# Supplementary material for: Comparative molecular analyses of select pH- and osmoregulatory genes in three freshwater crayfish Cherax quadricarinatus, C. destructor and C. cainii
Source: PeerJ. 2017 Aug 24;5:e3623. doi: 10.7717/peerj.3623 (PMC5572425; doi:10.7717/peerj.3623)
Supplement: File S2 — Annotated information of all the assembled contings obtained from Heart of freshwater crayfish Cherax quadricarinatus. Reads which met our quality criteria (Q > 30, N bases <1%) were accepted for assembly. The filtered reads were assembled with the Trinity short read de novo assembler using the stranded option for Illumina data (Version 2014-04-13p1) and the unstranded option for Ion Torrent data. Assembled data were used as BLASTx queries against the NCBI NR protein database using BLAST + (Version 2.2.29) with a stringency of 10 × e−5. First row contains information on: number of original contigs, sequence length (contig length bp), seq. description (gene names), number of HITs and mean e-values (stringency). [file peerj-05-3623-s004.xlsx]

## Sheet: sq_table_1-4
Contig#	Seq. Name	Seq. Description	Seq. Length	#Hits	min. eValue	mean Similarity
729	c794_g1_i1	10 kda heat shock mitochondrial-like	1034	20	9.10882e-41	0.804
730	c794_g1_i2	10 kda heat shock mitochondrial-like	706	20	5.23485e-42	0.804
18954	c12180_g1_i1	116 kda u5 small nuclear ribonucleoprotein component	303	20	8.23542e-59	0.98
11225	c37957_g1_i1	116 kda u5 small nuclear ribonucleoprotein component-like	208	20	1.42225e-31	0.92
16441	c9596_g1_i1	116 kda u5 small nuclear ribonucleoprotein component-like	360	20	5.04326e-71	0.9485
22859	c16145_g1_i1	116 kda u5 small nuclear ribonucleoprotein component-like	316	20	1.52431e-16	0.69
25381	c18739_g1_i1	116 kda u5 small nuclear ribonucleoprotein component-like	455	20	8.60429e-72	0.859
18679	c11907_g1_i1	14 kda phosphohistidine phosphatase	910	20	1.46842e-40	0.7145
4133	c4545_g1_i1	14-3-3 protein epsilon	4722	20	1.41679e-145	0.9505
4134	c4545_g1_i2	14-3-3 protein epsilon	4268	20	1.61114e-146	0.9505
1157	c1219_g1_i1	14-3-3 zeta	2519	20	5.29133e-172	0.958
24923	c18273_g1_i1	15 kda selenoprotein	1128	20	1.59863e-56	0.706
30172	c23664_g1_i1	150 kda dynein-associated polypeptide	237	20	3.65663e-18	0.7885
9957	c36649_g1_i1	15-hydroxyprostaglandin dehydrogenase	234	20	1.14817e-13	0.669
18663	c11891_g1_i1	15-hydroxyprostaglandin dehydrogenase	462	20	1.30452e-37	0.666
2403	c2585_g1_i1	16s rrna uridine-516 pseudouridylate synthase	1951	1	7.7783e-06	0.65
14113	c7238_g1_i1	1-acyl-sn-glycerol-3-phosphate acyltransferase epsilon	266	20	4.24884e-27	0.6275
24842	c18191_g1_i1	1-acyl-sn-glycerol-3-phosphate acyltransferase epsilon	654	20	9.55856e-46	0.7285
6280	c32905_g1_i1	1-acyl-sn-glycerol-3-phosphate acyltransferase epsilon-like	239	3	1.12675e-12	0.5667
34731	c28323_g1_i1	1-acyl-sn-glycerol-3-phosphate acyltransferase gamma-like	1341	20	2.29644e-130	0.6735
36881	c30498_g1_i1	1-aminocyclopropane-1-carboxylate synthase-like protein 1-like	357	1	4.86795e-06	0.63
25994	c19361_g1_i1	1-aminocyclopropane-1-carboxylate synthase-like protein 2	513	20	2.99401e-08	0.6135
7514	c34161_g1_i1	1-associated eps domain-containing	289	20	3.06617e-13	0.842
17618	c10808_g1_i1	1-associated eps domain-containing	493	8	7.27804e-13	0.635
34458	c28050_g1_i1	1-associated eps domain-containing	822	14	2.74214e-15	0.6179
38704	c32371_g1_i1	1-phosphatidylinositol- -bisphosphate phosphodiesterase classes i and ii	242	20	1.51332e-36	0.88
31204	c24702_g1_i1	1-phosphatidylinositol- -bisphosphate phosphodiesterase epsilon-1	241	20	1.02349e-15	0.739
16061	c9212_g1_i1	1-phosphatidylinositol -bisphosphate phosphodiesterase epsilon-1-like	300	20	3.22576e-07	0.626
11559	c38298_g1_i1	1-phosphatidylinositol- -bisphosphate phosphodiesterase gamma-1	235	20	1.24268e-11	0.6405
32680	c26211_g1_i1	1-phosphatidylinositol-3-phosphate 5-kinase-like	224	20	7.84875e-29	0.751
9361	c36039_g1_i1	2 -phosphodiesterase 12	234	20	2.79737e-27	0.749
22322	c15597_g1_i1	2 -phosphodiesterase 12	283	20	2.3997e-20	0.5965
23315	c16616_g1_i1	2 -phosphodiesterase 12-like	325	20	6.04027e-29	0.628
29610	c23098_g1_i1	26s protease regulatory subunit 4-like	1558	20	0	0.9705
7131	c33781_g1_i1	26s protease regulatory subunit 6a-like	1318	20	0	0.9315
13694	c6816_g1_i1	26s protease regulatory subunit 6b	1608	20	0	0.9335
559	c597_g1_i1	26s protease regulatory subunit 7	1575	20	0	0.958
35133	c28726_g1_i1	26s protease regulatory subunit 8-like	1324	20	0	0.96
3255	c3542_g1_i1	26s protease regulatory subunit s10b	1482	20	0	0.953
12757	c6396_g6_i3	26s proteasome non-atpase regulatory	1815	9	7.41563e-14	0.6956
13362	c6488_g1_i1	26s proteasome non-atpase regulatory subunit 10 isoform x1	1273	20	1.45322e-62	0.685
13363	c6488_g1_i2	26s proteasome non-atpase regulatory subunit 10 isoform x1	1484	20	8.03162e-62	0.685
36171	c29783_g1_i1	26s proteasome non-atpase regulatory subunit 10-like	1002	20	7.05456e-21	0.551
37916	c31559_g1_i1	26s proteasome non-atpase regulatory subunit 10-like	387	20	9.71049e-16	0.5385
14001	c7123_g1_i1	26s proteasome non-atpase regulatory subunit 11-like	1436	20	2.00409e-173	0.8145
23914	c17255_g1_i1	26s proteasome non-atpase regulatory subunit 12 isoform x1	1618	20	0	0.797
7379	c34026_g1_i1	26s proteasome non-atpase regulatory subunit 13-like	1484	20	3.09975e-139	0.7255
5048	c5431_g1_i1	26s proteasome non-atpase regulatory subunit 14	1335	20	0	0.9385
2631	c2807_g1_i1	26s proteasome non-atpase regulatory subunit 1-like	3241	20	0	0.7175
2632	c2807_g1_i2	26s proteasome non-atpase regulatory subunit 1-like	3136	20	0	0.745
374	c392_g1_i2	26s proteasome non-atpase regulatory subunit 2	2028	20	6.60138e-134	0.941
373	c392_g1_i1	26s proteasome non-atpase regulatory subunit 2-like	2998	20	0	0.829
35323	c28920_g1_i1	26s proteasome non-atpase regulatory subunit 4-like	1722	20	3.0488e-141	0.6835
21127	c14381_g1_i1	26s proteasome non-atpase regulatory subunit 5	522	20	1.75724e-22	0.5585
34567	c28158_g1_i1	26s proteasome non-atpase regulatory subunit 5	233	20	3.28928e-09	0.597
24184	c17528_g1_i1	26s proteasome non-atpase regulatory subunit 6-like	1450	20	0	0.829
34558	c28149_g1_i1	26s proteasome non-atpase regulatory subunit 7-like	1039	20	5.13056e-146	0.8815
1731	c1868_g1_i1	26s proteasome non-atpase regulatory subunit 8	1030	20	3.57773e-96	0.7485
1866	c1990_g1_i1	26s proteasome non-atpase regulatory subunit 9	901	20	1.04862e-60	0.6685
1867	c1990_g1_i2	26s proteasome non-atpase regulatory subunit 9	787	20	7.96773e-41	0.549
1738	c1875_g1_i1	28 kda heat- and acid-stable phosphoprotein	2350	20	3.24298e-14	0.731
6052	c32667_g1_i1	28s ribosomal protein mitochondrial	533	20	6.52359e-47	0.6485
6849	c33497_g1_i1	28s ribosomal protein mitochondrial	806	20	9.053e-41	0.783
7683	c34332_g1_i1	28s ribosomal protein mitochondrial	942	20	2.98393e-45	0.7345
35276	c28872_g1_i1	28s ribosomal protein mitochondrial	207	5	1.21775e-07	0.678
1018	c1086_g1_i1	28s ribosomal protein mitochondrial-like	691	20	1.62053e-24	0.823
1019	c1086_g1_i2	28s ribosomal protein mitochondrial-like	725	20	7.85263e-44	0.704
1794	c1921_g1_i1	28s ribosomal protein mitochondrial-like	1089	20	1.34217e-101	0.7825
2111	c2258_g1_i1	28s ribosomal protein mitochondrial-like	1554	20	1.88228e-112	0.6935
2178	c2345_g1_i1	28s ribosomal protein mitochondrial-like	1161	20	7.4333e-69	0.7455
2179	c2345_g1_i2	28s ribosomal protein mitochondrial-like	1239	20	8.89394e-63	0.6395
7237	c33886_g1_i1	28s ribosomal protein mitochondrial-like	1369	20	1.53387e-82	0.6615
12248	c6241_g2_i1	28s ribosomal protein mitochondrial-like	1347	20	2.86517e-42	0.6085
13425	c6545_g1_i1	28s ribosomal protein mitochondrial-like	1684	20	2.17448e-155	0.7295
14380	c7509_g1_i1	28s ribosomal protein mitochondrial-like	1058	20	1.63776e-78	0.701
15019	c8157_g1_i1	28s ribosomal protein mitochondrial-like	537	20	8.87931e-43	0.7735
19234	c12462_g1_i1	28s ribosomal protein mitochondrial-like	1205	20	1.70735e-104	0.658
19986	c13221_g1_i1	28s ribosomal protein mitochondrial-like	1843	20	3.10659e-110	0.519
22887	c16177_g1_i1	28s ribosomal protein mitochondrial-like	434	20	1.49521e-11	0.562
29630	c23119_g1_i1	28s ribosomal protein mitochondrial-like	1312	20	2.919e-111	0.629
32872	c26405_g1_i1	28s ribosomal protein mitochondrial-like	585	20	9.71844e-30	0.7465
30408	c23901_g1_i1	2-amino-3-carboxymuconate-6-semialdehyde decarboxylase	270	20	3.35488e-38	0.8375
2644	c2821_g1_i1	2-amino-3-ketobutyrate coenzyme a mitochondrial	1848	20	0	0.8275
2645	c2821_g1_i2	2-amino-3-ketobutyrate coenzyme a mitochondrial	1699	20	0	0.8275
20165	c13402_g1_i1	2-aminoethanethiol dioxygenase-like	1146	20	2.79218e-46	0.527
8124	c34780_g1_i1	2-deoxyglucose-6-phosphate phosphatase	254	20	2.56998e-29	0.7725
36137	c29749_g1_i1	2-hydroxyacid dehydrogenase	469	20	8.89747e-102	0.976
1407	c1516_g1_i1	2-hydroxyacyl- lyase 1	459	20	5.91073e-50	0.7635
27613	c21026_g1_i1	2-hydroxyacyl- lyase 1	444	20	6.10811e-10	0.808
22453	c15730_g1_i1	2-hydroxyacyl- lyase 1-like	217	20	1.68012e-25	0.7415
31452	c24956_g1_i1	2-hydroxyacyl- lyase 1-like	1012	20	7.62558e-48	0.752
11240	c37972_g1_i1	2-hydroxyacylsphingosine 1-beta-galactosyltransferase- partial	202	20	1.74218e-11	0.6615
8214	c34870_g1_i1	2-methoxy-6-polyprenyl- -benzoquinol mitochondrial	1075	20	3.70123e-114	0.703
3267	c3558_g1_i1	2-oxoglutarate and iron-dependent oxygenase domain-containing protein 1	1288	20	2.94813e-42	0.534
9555	c36239_g1_i1	2-oxoglutarate and iron-dependent oxygenase domain-containing protein 1	289	20	7.26142e-32	0.727
24281	c17625_g1_i1	2-oxoglutarate and iron-dependent oxygenase domain-containing protein 1-like	1973	20	1.39028e-48	0.693
15395	c8536_g1_i1	2-oxoglutarate and iron-dependent oxygenase domain-containing protein 2	450	20	4.0388e-33	0.609
30395	c23888_g1_i1	2-oxoglutarate and iron-dependent oxygenase domain-containing protein 2-like	272	20	1.4069e-31	0.7395
2757	c2968_g1_i1	2-oxoglutarate mitochondrial-like	4035	20	0	0.832
12509	c6338_g3_i1	2-oxoisovalerate dehydrogenase subunit mitochondrial-like	3573	20	1.33937e-171	0.869
12513	c6338_g3_i2	2-oxoisovalerate dehydrogenase subunit mitochondrial-like	3586	20	1.47286e-171	0.869
29180	c22660_g1_i1	2-oxoisovalerate dehydrogenase subunit mitochondrial-like	1435	20	0	0.818
35510	c29109_g1_i1	3 (2 ) -bisphosphate nucleotidase 1	230	20	5.64559e-30	0.835
24181	c17525_g1_i1	39s ribosomal protein l13	967	20	1.33912e-76	0.802
4565	c5022_g1_i1	39s ribosomal protein mitochondrial	1155	20	2.89366e-68	0.6735
4566	c5022_g1_i2	39s ribosomal protein mitochondrial	880	20	6.64927e-49	0.666
6930	c33579_g1_i1	39s ribosomal protein mitochondrial	406	20	2.20265e-53	0.806
8937	c35607_g1_i1	39s ribosomal protein mitochondrial	695	20	1.02797e-65	0.7365
9520	c36204_g1_i1	39s ribosomal protein mitochondrial	468	20	2.9983e-34	0.7505
10297	c36998_g1_i1	39s ribosomal protein mitochondrial	694	20	9.88034e-59	0.776
11983	c6128_g1_i1	39s ribosomal protein mitochondrial	1018	20	6.11793e-40	0.6555
12546	c6345_g2_i1	39s ribosomal protein mitochondrial	1378	20	3.82693e-111	0.7695
19059	c12286_g1_i1	39s ribosomal protein mitochondrial	1273	20	1.80978e-52	0.7225
24474	c17819_g1_i1	39s ribosomal protein mitochondrial	928	20	4.17661e-76	0.7095
433	c454_g1_i1	39s ribosomal protein mitochondrial-like	381	20	2.53419e-15	0.835
723	c789_g1_i1	39s ribosomal protein mitochondrial-like	1643	20	3.67235e-118	0.6585
1017	c1085_g1_i1	39s ribosomal protein mitochondrial-like	563	20	8.09478e-27	0.6995
1660	c1796_g1_i1	39s ribosomal protein mitochondrial-like	628	20	6.81562e-20	0.606
2146	c2301_g1_i1	39s ribosomal protein mitochondrial-like	940	20	1.87106e-32	0.6995
2147	c2301_g1_i2	39s ribosomal protein mitochondrial-like	902	20	1.09389e-32	0.698
2967	c3197_g1_i1	39s ribosomal protein mitochondrial-like	1427	20	1.33184e-119	0.6715
3141	c3403_g1_i1	39s ribosomal protein mitochondrial-like	818	20	2.76853e-46	0.663
4567	c5022_g1_i3	39s ribosomal protein mitochondrial-like	984	20	2.32805e-30	0.699
4568	c5022_g1_i4	39s ribosomal protein mitochondrial-like	954	20	8.3926e-27	0.596
8257	c34913_g1_i1	39s ribosomal protein mitochondrial-like	643	20	5.42435e-16	0.7995
12606	c6365_g5_i1	39s ribosomal protein mitochondrial-like	1940	20	4.00291e-79	0.604
12879	c6422_g1_i1	39s ribosomal protein mitochondrial-like	944	20	2.68031e-25	0.6775
12880	c6422_g1_i2	39s ribosomal protein mitochondrial-like	716	20	6.57255e-26	0.6775
13531	c6652_g1_i1	39s ribosomal protein mitochondrial-like	1160	20	9.13315e-111	0.7375
13787	c6909_g1_i1	39s ribosomal protein mitochondrial-like	1679	20	1.04538e-103	0.7485
14166	c7291_g1_i1	39s ribosomal protein mitochondrial-like	848	20	3.04624e-69	0.7265
14827	c7962_g1_i1	39s ribosomal protein mitochondrial-like	408	20	1.87311e-30	0.7735
21697	c14960_g1_i1	39s ribosomal protein mitochondrial-like	438	20	1.83144e-22	0.659
29233	c22713_g1_i1	39s ribosomal protein mitochondrial-like	643	20	3.755e-28	0.694
29579	c23067_g1_i1	39s ribosomal protein mitochondrial-like	1523	20	1.14934e-69	0.6655
34554	c28145_g1_i1	39s ribosomal protein mitochondrial-like	1495	20	7.43087e-108	0.6985
34907	c28499_g1_i1	39s ribosomal protein mitochondrial-like	1213	20	1.07477e-36	0.648
35311	c28908_g1_i1	39s ribosomal protein mitochondrial-like	1444	20	3.91493e-36	0.5465
35479	c29078_g1_i1	39s ribosomal protein mitochondrial-like	1076	20	5.96776e-40	0.6545
36111	c29721_g1_i1	39s ribosomal protein mitochondrial-like	1057	20	7.77796e-68	0.5995
4295	c4731_g1_i1	3-hydroxy-3-methylglutaryl-coenzyme a reductase	3143	20	0	0.7025
4296	c4731_g1_i2	3-hydroxy-3-methylglutaryl-coenzyme a reductase	3031	20	0	0.7095
2846	c3072_g1_i1	3-hydroxyisobutyrate mitochondrial	2014	20	9.27028e-149	0.7935
2847	c3072_g1_i2	3-hydroxyisobutyrate mitochondrial-like	1887	20	1.04592e-96	0.761
30705	c24201_g1_i1	3-hydroxyisobutyryl- mitochondrial	713	20	8.45118e-78	0.706
25129	c18484_g1_i1	3-hydroxyisobutyryl- mitochondrial-like	400	20	3.95062e-25	0.767
30116	c23607_g1_i1	3-ketoacyl- mitochondrial	1697	20	0	0.813
2327	c2505_g1_i1	3-ketodihydrosphingosine reductase	308	2	6.89648e-06	0.64
2199	c2367_g1_i1	3-ketodihydrosphingosine reductase-like	352	20	2.96643e-21	0.6395
699	c768_g1_i1	3-methyl-2-oxobutanoate dehydrogenase	1303	20	3.8157e-156	0.745
700	c768_g1_i2	3-methyl-2-oxobutanoate dehydrogenase	1583	20	8.80134e-165	0.749
24190	c17534_g1_i1	3-oxoacid transferase 1	2333	20	0	0.837
28388	c21822_g1_i1	3-oxoacyl-	296	12	1.17979e-09	0.6517
23335	c16638_g1_i1	3-oxoacyl-acp synthase	219	20	3.29448e-27	0.806
3381	c3698_g1_i1	3-oxoacyl-acyl-carrier-protein reductase	1059	20	3.92949e-95	0.7335
3382	c3698_g1_i2	3-oxoacyl-acyl-carrier-protein reductase	971	20	1.40751e-95	0.7335
4891	c5280_g1_i1	3-phosphoinositide-dependent protein kinase 1-like	1987	20	0	0.6705
2941	c3166_g1_i1	40s ribosomal protein mitochondrial-like isoform x2	1259	20	6.90883e-52	0.856
3300	c3599_g1_i2	40s ribosomal protein s11	506	20	7.47902e-96	0.868
35826	c29430_g1_i1	40s ribosomal protein s13	574	20	6.17906e-92	0.9385
6744	c33393_g1_i1	40s ribosomal protein s15	534	20	1.45833e-60	0.9
377	c395_g1_i1	40s ribosomal protein s15a	468	20	1.49821e-84	0.952
24129	c17472_g1_i1	40s ribosomal protein s16-like protein	522	20	4.26732e-84	0.917
24611	c17959_g1_i1	40s ribosomal protein s17-like	501	20	7.24506e-73	0.9475
30733	c24229_g1_i1	40s ribosomal protein s19a-like	571	20	1.18024e-101	0.843
14262	c7388_g1_i1	40s ribosomal protein s20	569	20	5.95689e-63	0.951
7210	c33860_g1_i1	40s ribosomal protein s21-like protein	351	20	2.49895e-49	0.8965
35610	c29212_g1_i1	40s ribosomal protein s23-like	514	20	5.01187e-95	0.972
775	c842_g1_i1	40s ribosomal protein s24-like isoform x3	500	20	1.33777e-58	0.889
690	c761_g1_i1	40s ribosomal protein s26	559	20	9.62621e-55	0.8835
691	c761_g1_i2	40s ribosomal protein s26	487	20	4.93645e-55	0.877
25005	c18358_g1_i1	40s ribosomal protein s27	440	20	8.67498e-53	0.9435
7026	c33675_g1_i1	40s ribosomal protein s28	336	20	9.29152e-27	0.945
26434	c19815_g1_i1	40s ribosomal protein s29-like	352	20	1.82622e-25	0.878
29200	c22680_g1_i1	40s ribosomal protein s3a	874	20	3.99219e-161	0.857
15007	c8145_g1_i1	40s ribosomal protein s5	716	20	3.93703e-131	0.9415
29787	c23276_g1_i1	40s ribosomal protein s7	644	20	3.61437e-130	0.8455
2706	c2890_g1_i1	40s ribosomal protein sa	1007	20	7.22895e-129	0.8855
25268	c18626_g1_i1	40s ribosomal protein sa-like	221	20	7.09584e-44	0.967
20741	c13986_g1_i1	45 kda immunophilin fkbp45	1317	20	1.40121e-39	0.7505
35034	c28627_g1_i1	45 kda immunophilin fkbp45	630	20	1.2736e-26	0.603
18625	c11852_g1_i1	4-aminobutyrate mitochondrial-like	1438	20	0	0.761
15542	c8685_g1_i1	4-coumarate- ligase	348	20	1.65192e-30	0.7405
2372	c2555_g1_i1	4-coumarate-- ligase	2141	20	1.92813e-169	0.6465
22462	c15739_g1_i1	4-hydroxyphenylpyruvate dioxygenase	243	20	9.34971e-23	0.85
24177	c17521_g1_i1	4-hydroxyphenylpyruvate dioxygenase	829	20	5.74855e-160	0.863
1406	c1514_g1_i1	4-hydroxyphenylpyruvate dioxygenase-like	1801	20	7.78434e-78	0.5265
14069	c7193_g1_i1	4-trimethylaminobutyraldehyde dehydrogenase	446	20	8.44476e-56	0.7305
38152	c31804_g1_i1	5 -3 exoribonuclease 1	314	20	2.40176e-18	0.7955
33385	c26933_g1_i1	5 -3 exoribonuclease 1-like isoform x1	215	2	2.42201e-07	0.69
18838	c12066_g1_i1	5 -3 exoribonuclease 2 homolog	2868	20	0	0.6785
2315	c2495_g1_i2	5 -amp-activated protein kinase catalytic subunit alpha-2	533	20	3.7737e-46	0.7245
2314	c2495_g1_i1	5 -amp-activated protein kinase catalytic subunit alpha-2-like	882	20	2.06203e-88	0.639
2316	c2495_g1_i3	5 -amp-activated protein kinase catalytic subunit alpha-2-like	846	20	4.8351e-92	0.664
10621	c37330_g1_i1	5 -amp-activated protein kinase catalytic subunit alpha-2-like	449	20	8.39445e-68	0.85
23999	c17341_g1_i1	5 -amp-activated protein kinase catalytic subunit alpha-2-like	480	20	1.08088e-108	0.9405
2003	c2130_g1_i1	5 -amp-activated protein kinase subunit beta-1-like	457	3	1.21086e-06	0.5267
16829	c9992_g1_i1	5 -nucleotidase domain-containing protein 1-like	250	20	1.46142e-21	0.655
23469	c16778_g1_i1	5 -nucleotidase domain-containing protein 1-like	315	15	9.06119e-17	0.58
11407	c38141_g1_i1	5 -nucleotidase domain-containing protein 3-like	269	20	4.12919e-18	0.771
13091	c6444_g4_i1	5 -nucleotidase domain-containing protein 3-like	707	20	4.99025e-85	0.6985
13100	c6444_g4_i3	5 -nucleotidase domain-containing protein 3-like	369	20	3.84283e-24	0.781
3131	c3392_g1_i1	50s ribosomal protein l1	1388	20	2.95304e-64	0.609
30644	c24138_g1_i1	52 kda repressor of the inhibitor of the protein kinase- partial	336	2	2.10704e-06	0.595
11257	c37990_g1_i1	52 kda repressor of the inhibitor of the protein kinase-like	403	2	5.50446e-07	0.52
11350	c38084_g1_i1	52 kda repressor of the inhibitor of the protein kinase-like	231	3	1.85769e-06	0.68
4145	c4560_g1_i1	5-aminolevulinate erythroid- mitochondrial-like	1194	20	4.26179e-151	0.716
4146	c4560_g1_i2	5-aminolevulinate erythroid- mitochondrial-like	1163	20	1.03261e-150	0.7155
19418	c12647_g1_i1	5-aminolevulinic acid synthase	1341	20	6.26047e-91	0.7435
20672	c13916_g1_i1	5-formyltetrahydrofolate cyclo-ligase	226	20	1.54431e-13	0.665
36587	c30201_g1_i1	5-ht1a	231	20	6.86434e-35	0.8545
34945	c28537_g1_i1	5-oxoprolinase isoform x1	291	20	1.24988e-41	0.7895
6729	c33379_g1_i1	60s acidic ribosomal protein p0	938	20	7.60373e-141	0.845
18753	c11982_g1_i1	60s acidic ribosomal protein p1	542	20	4.51645e-25	0.838
36748	c30363_g1_i1	60s acidic ribosomal protein p2	387	20	8.92388e-20	0.7825
14841	c7976_g1_i1	60s ribosomal export protein nmd3	326	20	1.96379e-33	0.752
15906	c9055_g1_i1	60s ribosomal export protein nmd3	1009	20	9.76017e-25	0.653
9575	c36261_g1_i1	60s ribosomal export protein nmd3-like	598	20	1.01228e-93	0.791
6867	c33515_g1_i1	60s ribosomal protein l12	653	20	4.54075e-79	0.8725
6833	c33481_g1_i1	60s ribosomal protein l13	717	20	3.09109e-103	0.776
23964	c17306_g1_i1	60s ribosomal protein l13a	722	20	5.96386e-121	0.805
29648	c23137_g1_i1	60s ribosomal protein l14	678	20	3.30449e-41	0.696
29730	c23219_g1_i1	60s ribosomal protein l18a-like	634	20	4.87305e-74	0.776
20318	c13556_g1_i1	60s ribosomal protein l19-like	653	20	2.63476e-75	0.885
24846	c18195_g1_i1	60s ribosomal protein l21	583	20	4.1644e-64	0.82
3449	c3773_g1_i1	60s ribosomal protein l22	628	20	4.52033e-37	0.7865
25494	c18852_g1_i1	60s ribosomal protein l23	506	20	1.92074e-86	0.9455
3285	c3577_g1_i2	60s ribosomal protein l23a	1053	20	2.34114e-60	0.8695
18832	c12060_g1_i1	60s ribosomal protein l27	849	20	4.83232e-57	0.796
24016	c17358_g1_i1	60s ribosomal protein l27a-like	689	20	1.04433e-58	0.8675
20258	c13496_g1_i1	60s ribosomal protein l29	362	20	7.53139e-20	0.919
25602	c18963_g1_i1	60s ribosomal protein l31	482	20	8.67836e-58	0.853
15299	c8440_g1_i1	60s ribosomal protein l34-like	441	20	2.17793e-40	0.8005
3089	c3337_g1_i1	60s ribosomal protein l36	431	20	2.0119e-62	0.871
31542	c25047_g1_i1	60s ribosomal protein l37a-like	400	20	4.4683e-43	0.8535
35170	c28763_g1_i1	60s ribosomal protein l38	349	20	6.02268e-36	0.9335
24960	c18311_g1_i1	60s ribosomal protein l5	1021	20	1.43486e-134	0.8175
24974	c18326_g1_i1	60s ribosomal protein l6	854	20	8.5366e-74	0.7385
3954	c4332_g1_i1	60s ribosomal protein l7 l12	860	20	9.26478e-42	0.697
30026	c23517_g1_i1	60s ribosomal protein l8	902	20	9.65187e-167	0.9155
24011	c17353_g1_i1	60s ribosomal protein l9	647	20	2.61311e-122	0.817
34772	c28364_g1_i1	60s ribosome subunit biogenesis protein nip7 homolog	922	20	3.87399e-85	0.772
2369	c2553_g1_i1	6-phosphofructo-2-kinase fructose- -bisphosphatase short form	4896	20	0	0.825
38416	c32077_g1_i1	6-phosphofructo-2-kinase fructose- -bisphosphatase short form	282	20	6.74788e-23	0.867
27436	c20845_g1_i1	6-phosphogluconate decarboxylating	278	20	2.76907e-36	0.9225
38182	c31834_g1_i1	6-phosphogluconate decarboxylating-like	203	20	6.68265e-22	0.896
37183	c30809_g1_i1	6-phosphogluconate dehydrogenase	334	20	6.12002e-41	0.933
8840	c35507_g1_i1	6-phosphogluconolactonase-like	657	20	1.22218e-75	0.6845
27506	c20917_g1_i1	72 kda inositol polyphosphate 5-phosphatase	301	20	2.01888e-38	0.732
30818	c24315_g1_i1	72 kda inositol polyphosphate 5-phosphatase	331	20	1.37002e-25	0.624
33195	c26737_g1_i1	72 kda inositol polyphosphate 5-phosphatase-like	211	7	3.50816e-07	0.7357
9069	c35741_g1_i1	7-dehydrocholesterol reductase	226	20	1.21432e-10	0.5715
29919	c23409_g1_i1	7sk snrna methylphosphate capping enzyme	355	20	1.10585e-19	0.709
34197	c27776_g1_i1	7sk snrna methylphosphate capping enzyme-like	246	20	5.03215e-33	0.7855
33376	c26924_g1_i1	80 kda mcm3-associated protein	258	20	2.89787e-21	0.7065
6982	c33630_g1_i1	85 88 kda calcium-independent phospholipase a2 isoform x2	248	20	5.7323e-13	0.621
31307	c24810_g1_i1	85 kda calcium-independent phospholipase a2	235	20	7.43993e-14	0.632
15349	c8490_g1_i1	85 kda calcium-independent phospholipase a2-like	633	20	1.53288e-50	0.5875
32657	c26187_g1_i1	85 kda calcium-independent phospholipase a2-like	265	20	1.00215e-30	0.8045
11562	c38301_g1_i1	a chain crystal structure of bace-1 in complex with 5-cyano-pyridine-2- carboxylic acid	435	20	6.81557e-30	0.601
13176	c6452_g1_i3	a chain l-ficolin complexed to n-acetyl-cystein	953	20	1.67705e-72	0.6625
18100	c11308_g1_i1	a chain structural studies of protein tyrosine phosphatase beta catalytic domain in complex with inhibitors	287	20	5.66624e-26	0.6535
22625	c15908_g1_i1	a disintegrin and metalloproteinase with thrombospondin motifs 17-like	211	20	2.2368e-16	0.634
29220	c22700_g1_i1	a disintegrin and metalloproteinase with thrombospondin motifs 3	930	20	1.22104e-58	0.512
30871	c24369_g1_i1	a disintegrin and metalloproteinase with thrombospondin motifs 3	366	20	1.81605e-08	0.5045
7344	c33991_g1_i1	a disintegrin and metalloproteinase with thrombospondin motifs 3-like	439	20	2.95183e-65	0.723
12721	c6393_g1_i1	a disintegrin and metalloproteinase with thrombospondin motifs 3-like	2397	20	1.24418e-16	0.5065
29692	c23181_g1_i1	a g-specific adenine dna glycosylase-like	327	20	8.53876e-40	0.748
33759	c27322_g1_i1	a g-specific adenine dna glycosylase-like	234	20	1.69047e-32	0.847
15227	c8367_g1_i1	a kinase anchor protein	263	2	2.84209e-07	0.785
1408	c1517_g1_i1	a2 protein	886	3	1.06103e-07	0.4033
33505	c27054_g1_i1	aaa atpase domain-containing protein	207	1	6.66062e-06	0.64
34850	c28441_g1_i1	AaceriAAL010Wp	598	2	3.69022e-06	0.445
30101	c23592_g1_i1	aael002100- partial	887	20	1.22342e-60	0.6535
3968	c4342_g1_i1	aael002251- partial	4021	20	3.21117e-120	0.6755
31181	c24679_g1_i1	aael002548- partial	567	4	4.58662e-09	0.505
9151	c35826_g1_i1	aael002829- partial	373	8	1.12871e-13	0.575
11897	c38658_g1_i1	aael002829- partial	442	20	1.05421e-65	0.8415
20646	c13890_g1_i1	aael002829- partial	381	20	1.87248e-20	0.595
22179	c15452_g1_i1	aael002829- partial	415	20	7.15919e-27	0.624
32733	c26264_g1_i1	aael002829- partial	217	7	3.0049e-08	0.7171
6004	c32619_g1_i1	aael005189- partial	357	20	5.59334e-13	0.554
9351	c36029_g1_i1	aael005189- partial	428	20	2.11382e-27	0.705
14735	c7869_g1_i1	aael005315- partial	1345	20	2.64248e-55	0.6965
15976	c9126_g1_i1	aael006472- partial	229	20	5.91696e-18	0.7105
34994	c28586_g1_i1	aael007538- partial	240	20	2.7753e-19	0.801
3107	c3362_g1_i1	aael008062- partial	308	20	5.3181e-61	0.878
25690	c19051_g1_i1	aael008062- partial	454	20	1.19148e-45	0.633
35949	c29555_g1_i1	aael008062- partial	262	20	5.41361e-20	0.846
16362	c9517_g1_i1	aael008845- partial	224	20	6.55099e-15	0.6995
22171	c15444_g1_i1	aael013398- partial	434	20	3.39996e-60	0.764
30718	c24214_g1_i1	aarf domain containing kinase 5	383	20	7.78092e-56	0.7805
30200	c23692_g1_i1	abc transporter	303	20	8.63648e-19	0.6185
9304	c35981_g1_i1	abc1 family protein	252	20	6.24208e-20	0.8005
9464	c36148_g1_i1	abcg4 protein	355	20	7.47631e-48	0.8265
3032	c3276_g1_i1	abhydrolase domain-containing protein 11-like	1312	20	4.79792e-80	0.62
30153	c23644_g1_i1	abhydrolase domain-containing protein 14a	816	20	1.28827e-47	0.5955
23028	c16321_g1_i1	abhydrolase domain-containing protein 16a	295	20	1.63823e-32	0.7275
16453	c9609_g1_i1	abhydrolase domain-containing protein 16a-like	467	20	1.17126e-11	0.6035
36617	c30231_g1_i1	abhydrolase domain-containing protein 16a-like	377	20	2.06008e-24	0.5705
24979	c18332_g1_i1	abhydrolase domain-containing protein 3-like	209	20	1.60918e-26	0.7845
26747	c20136_g1_i1	abhydrolase domain-containing protein 4	415	20	5.14167e-21	0.691
33842	c27407_g1_i1	abhydrolase domain-containing protein 4	460	20	3.61754e-62	0.7375
15914	c9063_g1_i1	abhydrolase domain-containing protein fam108c1-like	350	20	2.56882e-67	0.918
25190	c18546_g1_i1	abnormal long morphology	1485	20	2.05906e-52	0.559
29900	c23390_g1_i1	abnormal long morphology	1487	20	3.01207e-27	0.578
37288	c30920_g1_i1	abnormal long morphology	288	8	8.64659e-12	0.6175
3053	c3296_g1_i1	abnormal x	2129	20	6.62568e-103	0.618
15143	c8281_g1_i1	abnormal x	1153	20	1.66501e-92	0.5955
2725	c2921_g1_i1	ac transposable element-derived protein 4	241	4	8.49575e-09	0.7025
3618	c3980_g1_i1	ac transposable element-derived protein 4	236	20	2.50864e-17	0.6415
3715	c4113_g1_i1	ac transposable element-derived protein 4	328	20	8.98911e-25	0.698
13132	c6447_g1_i1	ac transposable element-derived protein 4	1404	20	9.57871e-86	0.598
13133	c6447_g2_i1	ac transposable element-derived protein 4	240	13	6.10018e-12	0.5669
13221	c6459_g1_i3	ac transposable element-derived protein 4	2180	20	3.43785e-116	0.5865
6725	c33375_g1_i1	ac1147-like partial	2994	20	6.29358e-57	0.7755
17239	c10415_g1_i1	accessory gland protein	358	20	1.29547e-10	0.6235
3237	c3516_g1_i1	ace-paralogous acetylcholinesterase	3407	20	0	0.826
26416	c19797_g1_i1	acetoacetyl- synthetase	205	20	9.10033e-20	0.718
26809	c20201_g1_i1	acetoacetyl- synthetase	464	20	1.5642e-56	0.785
33581	c27134_g1_i1	acetoacetyl- synthetase	202	20	6.52385e-22	0.798
38076	c31726_g1_i1	acetoacetyl- synthetase	287	20	4.37919e-40	0.7845
1833	c1958_g1_i1	acetolactate synthase-like	2602	20	0	0.798
1887	c2011_g1_i2	acetyl- carboxylase	485	20	7.60874e-41	0.8455
22057	c15329_g1_i1	acetyl- carboxylase	480	20	1.80904e-09	0.635
31104	c24602_g1_i1	acetyl- carboxylase	367	20	2.22831e-23	0.8425
36102	c29712_g1_i1	acetyl- carboxylase	673	20	1.89829e-10	0.645
7364	c34011_g1_i1	acetyl- carboxylase 2	268	20	1.66788e-35	0.851
9080	c35752_g1_i1	acetyl- carboxylase 2	219	20	5.73465e-08	0.845
38301	c31958_g1_i1	acetyl- carboxylase-like isoform 2	385	20	1.84367e-25	0.7995
13014	c6435_g1_i1	acetyl- mitochondrial	2116	20	0	0.813
13021	c6435_g1_i7	acetyl- mitochondrial	1899	20	0	0.813
1886	c2011_g1_i1	acetyl-coa carboxylase	630	20	3.05798e-22	0.849
28069	c21495_g1_i1	acetyl-coa carboxylase	304	20	2.76297e-11	0.9655
29472	c22960_g1_i1	acetyl-coenzyme a synthetase 2- mitochondrial	506	20	1.17831e-73	0.7935
31501	c25005_g1_i1	acetyl-coenzyme a synthetase 2- mitochondrial	337	20	8.67908e-48	0.7975
30898	c24396_g1_i1	acetyl-coenzyme a synthetase 2- mitochondrial-like	682	20	2.43832e-81	0.769
35394	c28991_g1_i1	acetyl-coenzyme a transporter 1-like	231	20	6.25694e-23	0.81
6813	c33462_g1_i1	achain crystal structure of a hairpin exchange variant of the targeting line-1 retrotransposon endonuclease	562	20	6.62514e-08	0.4725
13767	c6889_g1_i1	achain crystal structure of engineered northeast structural genomics consortium target	319	20	5.15019e-15	0.5885
13146	c6449_g1_i2	achain esterase domain of the zfl2-1 orf1 protein from the zebrafish zfl2-1 retrotransposon	1137	5	1.01241e-12	0.502
15689	c8834_g1_i1	achain structural determinants for improved thermal stability of designed ankyrin repeat proteins with a redesigned c- capping	274	20	7.08315e-08	0.6205
35606	c29208_g1_i1	acid phosphatase isoenzyme	654	20	5.29606e-61	0.7045
16044	c9195_g1_i1	acidic leucine-rich nuclear phosphoprotein 32 family member b	252	8	7.67767e-28	0.7525
14300	c7427_g1_i1	acidic mammalian chitinase-like	339	20	2.4399e-09	0.612
7335	c33982_g1_i1	aconitate mitochondrial-like	3205	20	0	0.873
12648	c6373_g1_i1	actin	1574	20	0	0.9645
12649	c6373_g1_i2	actin	849	20	8.91111e-158	0.9695
23989	c17331_g1_i1	actin	1020	20	0	0.9935
15198	c8338_g1_i1	actin binding protein	1353	20	3.64263e-65	0.7415
203	c200_g1_i1	actin binding protein abp-280	292	20	1.29046e-24	0.676
11959	c6116_g1_i3	actin partial	345	20	6.93799e-76	0.9695
30936	c24434_g1_i1	actin-binding protein ipp	321	20	4.7538e-28	0.7645
7856	c34508_g1_i1	actin-depolymerizing factor 1	929	20	8.53644e-52	0.769
23915	c17256_g1_i1	actin-depolymerizing factor 1	1374	20	2.08496e-60	0.796
27176	c20580_g1_i1	actin-like protein 6a	364	20	3.85734e-16	0.702
30086	c23577_g1_i1	actin-like protein 6b	1418	20	2.90679e-158	0.802
19218	c12446_g1_i1	actin-like protein 87c-like	334	20	1.03828e-55	0.931
14383	c7512_g1_i1	actin-related protein 10	640	20	5.84601e-68	0.6955
35317	c28914_g1_i1	actin-related protein 10	416	20	9.47148e-33	0.676
10835	c37554_g1_i1	actin-related protein 10-like	362	20	1.34414e-14	0.6665
14762	c7896_g1_i1	actin-related protein 2 3 complex subunit 3-like	1091	20	4.5229e-84	0.7825
36133	c29745_g1_i1	actin-related protein 2 3 complex subunit 4-like	637	20	4.36689e-101	0.9375
36665	c30279_g1_i1	actin-related protein 2 3 complex subunit 5	234	20	1.11339e-23	0.8175
13695	c6817_g1_i1	actin-related protein 2 isoform x2	1278	20	0	0.9275
14425	c7555_g1_i1	actin-related protein 3	540	20	3.21774e-25	0.8915
24605	c17952_g1_i1	actin-related protein 3	1149	20	0	0.9065
28254	c21682_g1_i1	actin-related protein 5	389	16	1.94247e-13	0.6056
33389	c26937_g1_i1	actin-related protein 5	225	20	1.76839e-21	0.7065
27640	c21054_g1_i1	actin-related protein 5-like	262	20	4.08937e-15	0.694
7801	c34453_g1_i1	actin-related protein 6	360	20	7.04655e-51	0.8055
11889	c38647_g1_i1	actin-related protein 8-like	214	20	1.32089e-17	0.683
19628	c12857_g1_i1	activating molecule in becn1-regulated autophagy protein 1	333	3	2.52752e-07	0.5767
13846	c6968_g1_i1	activating molecule in becn1-regulated autophagy protein 1 isoform x2	246	20	1.09194e-08	0.5805
22856	c16142_g1_i1	activating signal cointegrator 1	221	20	7.96596e-27	0.787
25942	c19307_g1_i1	activating signal cointegrator 1	372	20	4.53915e-23	0.6735
33485	c27034_g1_i1	activating signal cointegrator 1	293	14	1.58109e-06	0.6543
21672	c14935_g1_i1	activating signal cointegrator 1 complex subunit 1-like	216	20	4.93642e-13	0.6825
27948	c21367_g1_i1	activating signal cointegrator 1 complex subunit 2 isoform 1	499	20	9.33442e-23	0.522
522	c553_g1_i1	activating signal cointegrator 1 complex subunit 3	664	20	3.2339e-11	0.774
9966	c36659_g1_i1	activating signal cointegrator 1 complex subunit 3	215	20	1.27281e-22	0.7845
28225	c21653_g1_i1	activating signal cointegrator 1 complex subunit 3	360	20	1.57511e-51	0.8305
36015	c29622_g1_i1	activating signal cointegrator 1 complex subunit 3	1089	20	2.91296e-115	0.6535
36380	c29996_g1_i1	activating signal cointegrator 1 complex subunit 3	242	20	4.0919e-31	0.82
36562	c30176_g1_i1	activating signal cointegrator 1 complex subunit 3	312	20	1.66073e-19	0.743
24558	c17904_g1_i1	activating signal cointegrator 1 complex subunit 3-like	696	20	3.38833e-106	0.825
34356	c27943_g1_i1	activating signal cointegrator 1-like	232	20	2.87882e-23	0.836
19670	c12900_g1_i1	activating transcription factor 7-interacting protein 1	543	20	2.63808e-22	0.6455
29622	c23110_g1_i1	activating transcription factor of chaperone-like	1895	20	2.00164e-80	0.735
34739	c28331_g1_i1	activator of 90 kda heat shock protein atpase homolog 1-like	1329	20	4.42258e-115	0.673
35074	c28667_g1_i1	activator of basal	681	20	4.56879e-30	0.722
18228	c11438_g1_i1	activin receptor type-1	471	20	6.23626e-83	0.852
794	c861_g1_i1	acyl- -binding domain-containing protein 6	1614	20	4.65746e-66	0.6235
795	c861_g1_i2	acyl- -binding domain-containing protein 6	1616	20	4.76315e-66	0.6235
27204	c20608_g1_i1	acyl- -binding protein	529	20	1.91037e-40	0.835
29560	c23048_g1_i1	acyl- dehydrogenase	575	20	5.13801e-85	0.798
13551	c6672_g1_i1	acyl- dehydrogenase family member mitochondrial-like	2747	20	0	0.7235
34767	c28359_g1_i1	acyl- dehydrogenase -like	2168	20	0	0.6975
8407	c35064_g1_i1	acyl- oxidase	1356	20	0	0.6925
35750	c29353_g1_i1	acyl- oxidase	1235	20	2.50245e-145	0.712
38145	c31796_g1_i1	acyl- oxidase	225	20	1.13752e-31	0.7975
3405	c3724_g1_i1	acylamino-acid-releasing enzyme	718	20	9.29868e-32	0.518
4644	c5079_g2_i1	acylamino-acid-releasing enzyme	1120	20	8.3107e-56	0.615
34640	c28231_g1_i1	acylamino-acid-releasing enzyme	537	20	1.23599e-11	0.4965
34186	c27765_g1_i1	acylamino-acid-releasing enzyme-like	268	20	3.73052e-19	0.629
23757	c17088_g1_i1	acyl-coenzyme a amino acid n-acyltransferase 2-like	212	20	1.37877e-21	0.79
976	c1046_g1_i1	acyl-coenzyme a oxidase peroxisomal	795	20	4.54665e-95	0.8085
977	c1046_g1_i2	acyl-coenzyme a oxidase peroxisomal	818	20	9.23686e-95	0.807
38105	c31756_g1_i1	acyl-coenzyme a thioesterase 1	451	20	4.31006e-25	0.62
25035	c18389_g1_i1	acyl-coenzyme a thioesterase 13-like	207	20	9.97248e-21	0.692
12580	c6358_g1_i1	acyl-coenzyme a thioesterase 4-like isoform x1	1424	20	6.852e-32	0.509
12722	c6393_g1_i2	acyl-coenzyme a thioesterase 4-like isoform x1	1318	20	2.2369e-37	0.477
17221	c10397_g1_i1	acyl-coenzyme a thioesterase 4-like isoform x1	224	8	1.06169e-10	0.5675
21074	c14326_g1_i1	acyl-coenzyme a thioesterase 4-like isoform x1	377	20	5.53466e-13	0.5365
37998	c31647_g1_i1	acyl-coenzyme a thioesterase 4-like isoform x1	257	20	1.51035e-12	0.562
16937	c10106_g1_i1	acyl-coenzyme a thioesterase 9	413	20	8.03389e-16	0.6085
15122	c8260_g1_i1	acyl-coenzyme a thioesterase mitochondrial-like	476	20	2.50066e-31	0.6405
21788	c15052_g1_i1	acyl-coenzyme a thioesterase mitochondrial-like	298	20	8.61022e-24	0.7065
25080	c18434_g1_i1	acyl-coenzyme a thioesterase mitochondrial-like	847	20	2.45123e-71	0.717
18343	c11555_g1_i1	acylglycerol mitochondrial-like	578	20	1.20688e-38	0.5635
20039	c13274_g1_i1	acylglycerol mitochondrial-like	268	20	8.19249e-28	0.6775
29179	c22659_g1_i1	acylphosphatase-1-like	854	20	8.45895e-17	0.793
33319	c26865_g1_i1	acylphosphatase-2-like	624	20	5.37927e-31	0.717
35841	c29446_g1_i1	acyl-protein thioesterase 1-like	1763	20	2.93649e-103	0.787
12977	c6430_g9_i1	acylpyruvase mitochondrial-like	1267	20	6.94157e-91	0.7185
2635	c2810_g1_i1	ACYPI45536	731	20	1.88121e-35	0.76
18849	c12077_g1_i1	adam 10	452	20	1.15182e-57	0.8265
20723	c13967_g1_i1	adam 10	341	20	2.94207e-54	0.8375
16982	c10152_g1_i1	adam 12	202	3	1.0192e-06	0.5433
23799	c17130_g1_i1	adam 17-like protease-like	244	20	1.30485e-38	0.8995
25478	c18836_g1_i1	adamts-like protein 4	413	20	4.21638e-37	0.5915
49	c52_g1_i1	adamts-like protein 5-like	807	20	9.40683e-36	0.5735
14555	c7686_g1_i1	adapter molecule crk	553	20	2.76104e-22	0.889
18947	c12173_g1_i1	adapter molecule crk-like isoform 1	296	20	5.14784e-36	0.719
33789	c27354_g1_i1	adaptin ear-binding coat-associated protein 2	247	20	4.80204e-25	0.8605
21041	c14293_g1_i1	adenomatous polyposis coli	375	3	2.28757e-06	0.48
18290	c11501_g1_i1	adenosine deaminase	249	8	2.39893e-07	0.65
29508	c22996_g1_i1	adenosine deaminase	3218	20	1.43937e-104	0.6075
17345	c10524_g1_i1	adenosine deaminase-like protein	246	20	8.04219e-21	0.756
19836	c13070_g1_i1	adenosine deaminase-like protein	215	20	4.23134e-16	0.72
6172	c32790_g1_i1	adenosine kinase	220	12	1.8895e-10	0.7858
2898	c3127_g1_i1	adenosine kinase 2	280	20	2.16459e-18	0.786
2899	c3127_g1_i2	adenosine kinase 2-like	205	20	7.57827e-19	0.7885
23978	c17320_g1_i1	adenosine kinase 2-like	658	20	4.94557e-90	0.7425
8673	c35335_g1_i1	adenosylhomocysteinase	713	20	6.43392e-80	0.886
17809	c11007_g1_i1	adenosylhomocysteinase 3	248	3	6.04646e-10	0.84
21874	c15143_g1_i1	adenosylhomocysteinase 3-like isoform x1	253	20	4.90504e-49	0.93
1743	c1879_g1_i1	adenylate cyclase	1901	20	0	0.7115
4547	c5005_g1_i1	adenylate cyclase	1049	20	6.49533e-130	0.8385
1244	c1317_g1_i1	adenylate cyclase type	564	20	3.6111e-55	0.6625
8288	c34944_g1_i1	adenylate cyclase type 9	277	20	3.61564e-39	0.855
14516	c7647_g1_i1	adenylate cyclase type 9-like	213	20	1.39592e-34	0.8265
27196	c20600_g1_i1	adenylate cyclase type 9-like	580	20	2.75332e-18	0.633
31589	c25094_g1_i1	adenylate cyclase type 9-like	217	20	3.14054e-17	0.6715
19054	c12281_g1_i1	adenylate kinase 2	868	20	4.48332e-122	0.8295
24405	c17749_g1_i1	adenylate kinase 3	519	20	5.11293e-67	0.7125
20830	c14078_g1_i1	adenylate kinase isoenzyme 6-like	729	20	1.47895e-69	0.823
33486	c27035_g1_i1	adenylosuccinate lyase	221	20	7.88084e-37	0.87
14416	c7546_g1_i1	adenylosuccinate lyase isoform x2	313	20	5.11375e-20	0.7595
15031	c8169_g1_i1	adenylosuccinate lyase-like	289	20	1.49016e-47	0.904
14044	c7166_g1_i1	adenylosuccinate synthetase-like	1590	20	0	0.7795
6767	c33416_g1_i1	adenylyl cyclase-associated protein 1-like	1949	20	1.44532e-156	0.6375
33438	c26986_g1_i1	adenylyltransferase and sulfurtransferase mocs3	317	20	5.40904e-12	0.7295
37694	c31338_g1_i1	adenylyltransferase and sulfurtransferase mocs3-like	462	20	3.07134e-39	0.658
31761	c25269_g1_i1	adipocyte plasma membrane-associated	473	20	2.42321e-48	0.694
29343	c22827_g1_i1	adipor-like receptor cg5315-like	1906	20	2.62402e-170	0.78
136	c121_g1_i1	adp atp translocase	1419	20	0	0.9075
31151	c24649_g1_i1	adp-dependent glucokinase-like	223	20	1.31525e-15	0.7925
26220	c19595_g1_i1	adp-ribose mitochondrial	731	20	1.00315e-83	0.745
37621	c31261_g1_i1	adp-ribose mitochondrial	391	20	9.21221e-26	0.6195
11786	c38538_g1_i1	adp-ribosylation factor	222	20	6.97427e-16	0.8755
3731	c4129_g1_i1	adp-ribosylation factor 1	1938	20	4.03066e-121	0.98
3732	c4129_g1_i2	adp-ribosylation factor 1	1879	20	8.04289e-122	0.978
13904	c7025_g1_i1	adp-ribosylation factor 4	1526	20	2.82552e-120	0.9375
7053	c33703_g1_i1	adp-ribosylation factor gtpase-activating	1026	20	2.31947e-27	0.6515
36701	c30316_g1_i1	adp-ribosylation factor gtpase-activating protein	388	9	1.80422e-40	0.63
38180	c31832_g1_i1	adp-ribosylation factor gtpase-activating protein	232	1	2.83015e-09	0.71
32813	c26345_g1_i1	adp-ribosylation factor gtpase-activating protein 1-like	209	20	1.88991e-10	0.877
27247	c20652_g1_i1	adp-ribosylation factor-binding protein gga1	246	20	4.0121e-23	0.7765
24	c30_g1_i1	adp-ribosylation factor-like 2	726	20	4.31101e-90	0.8475
22346	c15621_g1_i1	adp-ribosylation factor-like protein 1-like	321	20	3.89145e-26	0.8835
24131	c17474_g1_i1	adp-ribosylation factor-like protein 1-like	429	20	2.24636e-83	0.948
10285	c36985_g1_i1	adp-ribosylation factor-like protein 2-binding protein	554	20	7.06949e-29	0.643
2602	c2781_g1_i1	adp-ribosylation factor-like protein 4a	671	1	9.75646e-06	0.69
19442	c12671_g1_i1	adp-ribosylation factor-like protein 4c-like	432	20	1.26479e-56	0.8295
27868	c21286_g1_i1	adp-ribosylation factor-like protein 4d	226	20	1.35616e-13	0.8015
25679	c19040_g1_i1	adp-ribosylation factor-like protein 6-interacting protein 4-like	558	20	8.87207e-27	0.814
4271	c4701_g1_i1	adp-ribosylation factor-like protein 8b	1366	20	7.39587e-126	0.9725
24361	c17704_g1_i1	adp-ribosylation factor-related protein 1-like	908	20	1.24208e-114	0.863
32861	c26393_g1_i1	adp-ribosylglycohydrolase superfamily	324	7	1.55241e-11	0.6329
10634	c37345_g1_i1	af091267_1axon-associated sh3 binding-like protein 168	277	20	6.18213e-13	0.509
15762	c8909_g1_i1	AF336805_1transglutaminase	229	1	1.53794e-06	0.76
10293	c36994_g1_i1	af355375_1 reverse transcriptase	495	20	1.71211e-09	0.5295
37870	c31512_g1_i1	af355752_1reverse transcriptase	304	3	2.70679e-07	0.7367
26119	c19489_g1_i1	af375602_1potassium channel protein shal	207	4	1.19086e-13	0.9325
2388	c2569_g1_i1	af4 fmr2 family member 3	1057	20	9.1143e-47	0.602
28154	c21581_g1_i1	af520716_1 mical-like protein	293	20	5.16898e-26	0.7025
330	c340_g1_i1	afadin	1106	20	3.23101e-136	0.7225
14408	c7538_g1_i1	afadin-like isoform x3	928	20	6.08746e-102	0.764
3130	c3391_g1_i1	afg3-like protein 2-like	3521	20	0	0.8105
30360	c23852_g1_i1	AGAP001296-PA	235	2	1.5576e-06	0.775
12116	c6192_g1_i1	AGAP006184-PA	3097	3	9.58364e-08	0.5133
12117	c6192_g1_i2	AGAP006184-PA	2621	3	7.61472e-08	0.5133
12119	c6192_g1_i4	AGAP006184-PA	3017	3	9.25964e-08	0.5133
12120	c6192_g1_i5	AGAP006184-PA	3145	3	9.78303e-08	0.5133
12121	c6192_g1_i6	AGAP006184-PA	3040	3	9.34687e-08	0.5133
12122	c6192_g1_i7	AGAP006184-PA	3076	5	1.64126e-07	0.464
3738	c4134_g1_i1	agap007532-pa isoform 2	3085	20	0	0.794
4677	c5102_g1_i1	AGAP007696-PA	2748	1	9.87045e-06	0.65
22810	c16095_g1_i1	AGAP008143-PA	219	3	8.7189e-06	0.57
15270	c8411_g1_i1	AGAP011530-PA	309	20	6.6087e-18	0.5635
12327	c6278_g1_i1	agmatinase	2108	20	2.31965e-156	0.7575
26615	c20000_g1_i1	agrn partial	355	20	7.58126e-29	0.6235
30461	c23954_g1_i1	a-kinase anchor protein 13-like	394	20	4.10099e-29	0.6755
30554	c24048_g1_i1	a-kinase anchor protein 7 isoform gamma	665	20	5.65214e-26	0.561
35196	c28789_g1_i1	akirin	699	2	2.82512e-11	0.955
2174	c2339_g1_i1	akirin-2 isoform 2	559	20	9.42656e-42	0.7
10453	c37157_g1_i1	akt-interacting protein	378	3	4.27805e-21	0.8467
14327	c7455_g1_i1	akt-interacting protein	519	20	2.38174e-71	0.761
13759	c6881_g1_i1	alanine aminotransferase	1902	20	0	0.795
6452	c33083_g1_i1	alanine racemase	232	20	1.15142e-31	0.619
24088	c17431_g1_i1	alanine--glyoxylate aminotransferase 2-like	2442	20	0	0.775
23289	c16588_g1_i1	alanine-glyoxylate transaminase	332	20	2.73125e-41	0.737
22241	c15514_g1_i1	alanyl-trna cytoplasmic	430	20	1.26233e-84	0.9125
24511	c17856_g1_i1	alanyl-trna cytoplasmic-like	370	20	1.29429e-48	0.846
21000	c14251_g1_i1	alanyl-trna editing protein aarsd1	372	20	6.92964e-38	0.7535
8959	c35629_g1_i1	alanyl-trna editing protein aarsd1-like	282	20	1.95446e-18	0.6755
22159	c15432_g1_i1	alanyl-trna synthetase	628	20	4.56598e-84	0.7605
26455	c19838_g1_i1	alanyl-trna synthetase	670	20	1.79689e-64	0.671
32775	c26307_g1_i1	alanyl-trna synthetase	412	20	1.87019e-59	0.7885
15480	c8622_g1_i1	alanyl-trna synthetase domain containing 1	281	20	5.42835e-25	0.666
35735	c29338_g1_i1	alcohol dehydrogenase class-3-like	1328	20	0	0.886
8026	c34681_g1_i1	aldehyde dehydrogenase 16 member a1	365	20	5.34933e-55	0.8035
20619	c13863_g1_i1	aldehyde dehydrogenase family 16 member a1	278	20	2.15051e-25	0.6405
9634	c36319_g1_i1	aldehyde dehydrogenase family 16 member a1-like	292	20	4.99445e-50	0.886
27561	c20973_g1_i1	aldehyde dehydrogenase family 8 member a1 isoform x1	364	20	1.56332e-51	0.788
20397	c13637_g1_i1	aldehyde dehydrogenase family 8 member a1 isoform x3	431	20	1.74349e-40	0.8195
26168	c19539_g1_i1	aldehyde dehydrogenase type isoform r	1238	20	1.55772e-168	0.7505
2397	c2579_g1_i1	aldehyde mitochondrial isoform x1	1968	20	0	0.827
12101	c6182_g1_i1	aldo-keto reductase	1303	20	9.57864e-148	0.7715
18719	c11948_g1_i1	aldo-keto reductase	1405	20	8.04743e-171	0.7715
30337	c23829_g1_i1	aldo-keto reductase family 1 member b10-like	236	20	1.0968e-15	0.646
35260	c28856_g1_i1	aldose 1-epimerase	895	20	4.04291e-80	0.643
19554	c12783_g1_i1	aliphatic nitrilase	1716	20	0	0.7915
34853	c28444_g1_i1	alk tyrosine kinase receptor-like	683	8	4.88656e-11	0.7263
37060	c30682_g1_i1	alkaline ceramidase	338	20	2.15363e-13	0.589
21797	c15061_g1_i1	alkaline ceramidase-like isoform 2	432	20	3.55794e-34	0.731
9229	c35905_g1_i1	alkaline phosphatase	319	20	1.12693e-41	0.754
9707	c36394_g1_i1	alkaline phosphatase	236	20	2.98603e-10	0.759
10272	c36972_g1_i1	alkaline phosphatase	273	20	3.88099e-18	0.6515
6935	c33584_g1_i1	alkaline tissue-nonspecific isozyme	2094	20	1.92384e-142	0.6195
10190	c36888_g1_i1	alkaline tissue-nonspecific isozyme	821	20	5.2444e-23	0.714
22424	c15701_g1_i1	alkaline tissue-nonspecific isozyme-like	370	20	3.23639e-58	0.776
16400	c9555_g1_i1	alkylated dna repair protein alkb homolog 1-like	614	20	1.73679e-52	0.591
10704	c37419_g1_i1	allene oxide synthase-lipoxygenase	260	20	5.44945e-20	0.656
20796	c14041_g1_i1	allene oxide synthase-lipoxygenase	1500	20	6.72232e-117	0.5885
38228	c31883_g1_i1	allene oxide synthase-lipoxygenase	655	20	2.05978e-61	0.665
14045	c7167_g1_i1	all-trans-retinol -reductase-like	2600	20	0	0.6685
3956	c4334_g1_i1	alpha 2 macroglobulin	4821	20	0	0.614
19815	c13047_g1_i1	alpha 2 macroglobulin	418	20	4.36571e-49	0.595
24327	c17670_g1_i1	alpha 2 macroglobulin	780	20	1.43999e-121	0.6425
24876	c18226_g1_i1	alpha 2 macroglobulin	269	11	2.62769e-39	0.7091
25881	c19245_g1_i1	alpha 2 macroglobulin	279	7	7.06094e-15	0.7
32489	c26015_g1_i1	alpha 2 macroglobulin	214	10	2.72754e-10	0.559
32959	c26494_g1_i1	alpha 2 macroglobulin	713	20	1.46111e-83	0.621
205	c202_g1_i1	alpha 2-macroglobulin	1877	20	0	0.7165
3251	c3535_g1_i1	alpha 2-macroglobulin	263	20	1.2778e-32	0.773
4068	c4445_g1_i1	alpha 2-macroglobulin	293	20	1.52667e-20	0.7375
7834	c34486_g1_i1	alpha 2-macroglobulin	538	18	1.77721e-56	0.5933
13482	c6603_g1_i1	alpha 2-macroglobulin	672	20	4.46612e-62	0.739
15771	c8918_g1_i1	alpha 2-macroglobulin	316	14	5.03241e-51	0.655
20298	c13536_g1_i1	alpha 2-macroglobulin	833	20	6.62156e-113	0.7195
27039	c20438_g1_i1	alpha 2-macroglobulin	209	15	2.20953e-27	0.6933
37168	c30793_g1_i1	alpha 2-macroglobulin	447	20	3.66034e-95	0.711
38827	c32500_g1_i1	alpha 2-macroglobulin	350	20	4.02736e-42	0.698
33149	c26690_g1_i1	alpha- and gamma-adaptin-binding protein p34 isoform 2	233	20	4.18257e-11	0.7135
14103	c7228_g1_i1	alpha beta fold family	1240	20	7.57457e-39	0.569
3033	c3276_g1_i2	alpha beta hydrolase domain-containing protein 11 isoform x4	1138	20	2.29145e-58	0.53
37077	c30700_g1_i1	alpha catalytic domain protein	223	20	8.47809e-08	0.777
14858	c7994_g1_i1	alpha catenin	644	20	1.73223e-44	0.866
25987	c19354_g1_i1	alpha gamma epsilon	243	20	3.88484e-39	0.8995
30674	c24168_g1_i1	alpha gamma epsilon	535	20	7.89806e-111	0.9585
18480	c11694_g1_i1	alpha- -mannosyl-glycoprotein 2-beta-n-acetylglucosaminyltransferase-like	210	20	1.38987e-26	0.8275
22984	c16276_g1_i1	alpha- -mannosyltransferase alg2-like	291	20	3.36363e-35	0.764
19207	c12435_g1_i1	alpha- -mannosyltransferase alg9	405	20	5.35646e-51	0.726
30960	c24458_g1_i1	alpha- partial	583	20	7.73693e-108	0.883
7248	c33897_g1_i1	alpha- sarcomeric-like isoform 1	4413	20	0	0.8975
13375	c6495_g1_i1	alpha tubulin	1586	20	0	0.96
29711	c23200_g1_i1	alpha tubulin	1499	20	0	0.982
35388	c28985_g1_i1	alpha tubulin	379	20	2.8748e-66	0.9605
1691	c1827_g1_i1	alpha tubulin partial	1637	20	0	0.9575
26648	c20034_g1_i1	alpha-( )-fucosyltransferase c	332	20	1.24535e-28	0.632
38422	c32083_g1_i1	alpha-( )-fucosyltransferase-like	440	20	1.12797e-10	0.527
24358	c17701_g1_i1	alpha\beta hydrolase	449	20	6.61726e-23	0.615
11693	c38437_g1_i1	alpha2 macroglobulin isoform 2	207	6	2.07908e-18	0.7133
26541	c19924_g1_i1	alpha-2-macroglobulin receptor-associated isoform x2	233	4	1.39583e-06	0.535
30841	c24339_g1_i1	alpha-2-macroglobulin receptor-associated protein	906	20	1.12161e-75	0.633
13085	c6442_g6_i1	alpha-aminoadipic semialdehyde dehydrogenase-like	2204	20	0	0.833
4848	c5235_g1_i1	alpha-aminoadipic semialdehyde mitochondrial-like	448	15	6.8564e-09	0.6667
12290	c6260_g1_i1	alpha-aminoadipic semialdehyde mitochondrial-like	3488	20	0	0.808
12291	c6260_g1_i2	alpha-aminoadipic semialdehyde mitochondrial-like	3174	20	0	0.8045
37651	c31293_g1_i1	alpha-amylase	283	20	2.49786e-21	0.6845
7166	c33816_g1_i1	alpha-aspartyl dipeptidase	495	20	7.93775e-13	0.6715
29485	c22973_g1_i1	alpha-aspartyl dipeptidase-like	420	20	9.42514e-67	0.833
25884	c19248_g1_i1	alpha-galactosidase alpha-n-acetylgalactosaminidase	739	20	2.04418e-88	0.8545
31369	c24873_g1_i1	alpha-galactosidase alpha-n-acetylgalactosaminidase	414	20	7.79072e-57	0.786
8179	c34835_g1_i1	alpha-ketoglutarate-dependent -dichlorophenoxyacetate dioxygenase- partial	650	20	2.90398e-74	0.7095
16327	c9482_g1_i1	alpha-ketoglutarate-dependent dioxygenase alkb homolog 6	433	20	7.0791e-57	0.8015
35445	c29044_g1_i1	alpha-ketoglutarate-dependent dioxygenase alkb homolog 7-like	484	20	7.11208e-31	0.738
25284	c18642_g1_i1	alpha-ketoglutarate-dependent sulfonate dioxygenase-like isoform x4	435	20	9.11445e-50	0.6785
13485	c6606_g1_i1	alpha-mannosidase	425	20	1.42975e-11	0.5315
29927	c23418_g1_i1	alpha-mannosidase 2	520	20	1.20203e-15	0.4935
38012	c31661_g1_i1	alpha-mannosidase 2	209	20	2.34883e-19	0.7575
19269	c12497_g1_i1	alpha-mannosidase 2c1	343	20	2.17308e-37	0.765
22254	c15528_g1_i1	alpha-mannosidase 2c1	235	20	7.44022e-14	0.6705
28537	c21980_g1_i1	alpha-mannosidase 2c1	270	20	1.83821e-24	0.6555
36839	c30456_g1_i1	alpha-mannosidase 2c1-like	305	20	2.11188e-27	0.666
23683	c17005_g1_i1	alpha-mannosidase 2x	204	20	8.28688e-14	0.706
27064	c20465_g1_i1	alpha-mannosidase 2x	236	20	1.51488e-32	0.7995
24784	c18133_g1_i1	alpha-methylacyl- racemase	247	20	5.04025e-37	0.855
26769	c20159_g1_i1	alpha-methylacyl- racemase	203	20	1.95311e-17	0.84
3076	c3320_g1_i1	alpha-n-acetylgalactosaminidase-like	341	20	8.30894e-64	0.865
3077	c3320_g1_i2	alpha-n-acetylgalactosaminidase-like	241	20	1.31737e-41	0.864
8916	c35585_g1_i1	alpha-taxilin isoform x3	344	20	4.05758e-30	0.7945
26072	c19439_g1_i1	alternative splicing factor srp20	365	20	1.23235e-09	0.659
6649	c33292_g1_i1	amine oxidase	202	20	1.09892e-12	0.6535
9524	c36208_g1_i1	amine oxidase	960	20	9.08555e-66	0.6265
25017	c18370_g1_i1	amine oxidase	372	20	2.17734e-25	0.665
10553	c37261_g1_i1	aminoacyl trna synthase complex-interacting multifunctional protein 1	666	20	2.56745e-32	0.5845
9175	c35850_g1_i1	aminoacyl trna synthase complex-interacting multifunctional protein 1-like	519	20	2.31442e-19	0.7325
2571	c2752_g1_i1	aminoacyl trna synthase complex-interacting multifunctional protein 2	1241	20	1.43407e-35	0.5185
2572	c2752_g1_i2	aminoacyl trna synthase complex-interacting multifunctional protein 2	1688	20	4.43351e-35	0.533
7744	c34394_g1_i1	aminoacyl trna synthase complex-interacting multifunctional protein 2-like isoform x1	232	4	1.55029e-08	0.5975
13332	c6481_g1_i1	aminoacylase-1 isoform x1	1456	20	3.18507e-172	0.7185
19458	c12687_g1_i1	aminoacylase-1 isoform x1	320	20	6.21589e-35	0.709
29879	c23368_g1_i1	aminoacylase-1 isoform x1	537	20	2.60021e-56	0.7305
13333	c6481_g2_i1	aminoacylase-1a-like	1536	20	5.45245e-172	0.736
25670	c19031_g1_i1	aminopeptidase -like	353	20	7.97466e-37	0.8515
38453	c32114_g1_i1	aminopeptidase -like	265	20	2.19481e-36	0.803
14623	c7754_g1_i1	aminopeptidase n	1116	20	4.08064e-68	0.6055
16130	c9284_g1_i1	aminopeptidase n	290	20	4.8074e-52	0.8745
34939	c28531_g1_i1	aminopeptidase n	2014	20	1.63787e-148	0.648
142	c126_g1_i1	amp deaminase 2	2816	20	0	0.7655
143	c126_g1_i2	amp deaminase 2	2789	20	0	0.7735
24525	c17871_g1_i1	amp dependent ligase	444	20	7.26901e-45	0.7695
26539	c19922_g1_i1	amp-activated protein kinase beta subunit	752	20	3.53375e-72	0.74
35600	c29202_g1_i1	amp-binding protein	290	20	2.18071e-11	0.7435
21449	c14707_g1_i1	amp-dependent synthetase	605	20	1.02018e-13	0.531
9274	c35951_g1_i1	amyloid beta protein-binding member 1interacting	387	20	2.72878e-53	0.7845
10520	c37224_g1_i1	amyloid protein-binding protein 2	318	20	1.43593e-15	0.6045
19024	c12250_g1_i1	amyloid protein-binding protein 2	588	20	1.89969e-82	0.8
22228	c15501_g1_i1	amyloid protein-binding protein 2	260	20	2.68916e-19	0.6715
34148	c27727_g1_i1	amyloid protein-binding protein 2	234	20	7.01583e-29	0.835
15023	c8161_g1_i1	an1-type zinc finger protein 1	2168	20	6.72476e-58	0.5645
3665	c4052_g1_i1	an1-type zinc finger protein 5-like	1868	20	2.19218e-34	0.6715
3666	c4052_g1_i2	an1-type zinc finger protein 5-like	1922	20	2.64732e-34	0.6715
36988	c30607_g1_i1	anaphase promoting complex subunit 1	235	20	1.1588e-12	0.6815
19756	c12986_g1_i1	anaphase-promoting complex subunit 1	229	8	5.65084e-08	0.665
25415	c18773_g1_i1	anaphase-promoting complex subunit 10-like	447	20	2.76422e-78	0.838
38073	c31723_g1_i1	anaphase-promoting complex subunit 4-like	302	4	5.97477e-08	0.555
35130	c28723_g1_i1	anaphase-promoting complex subunit 7	659	20	1.49953e-43	0.646
30605	c24099_g1_i1	ancient ubiquitous protein 1	683	20	4.6623e-23	0.513
37402	c31037_g1_i1	ancient ubiquitous protein 1-like	669	20	9.07915e-35	0.581
3485	c3824_g1_i2	and ph domain-containing protein 6	2550	20	2.45195e-129	0.61
3486	c3824_g1_i3	and ph domain-containing protein 6	1669	20	6.05361e-156	0.609
3484	c3824_g1_i1	and ph domain-containing protein 6-like	2190	20	8.33997e-131	0.61
29996	c23487_g1_i1	and pleckstrin domain-containing protein 1	691	20	1.98473e-87	0.6775
1117	c1181_g1_i1	and pleckstrin domain-containing protein 2	1928	20	0	0.7835
32603	c26131_g1_i1	and pleckstrin domain-containing protein 2	231	20	2.73546e-20	0.721
1118	c1181_g1_i2	and pleckstrin domain-containing protein 2-like	1697	20	0	0.8005
31159	c24657_g1_i1	and pleckstrin domain-containing protein 2-like isoform x4	1296	20	1.73329e-71	0.849
32249	c25768_g1_i1	androgen induced inhibitor of proliferation pds5	269	20	8.97457e-24	0.704
11610	c38349_g1_i1	androgen-induced inhibitor of proliferation-like protein	205	20	6.60354e-24	0.82
11872	c38628_g1_i1	androgen-induced proliferation inhibitor	235	20	3.78079e-31	0.8205
23368	c16673_g1_i1	angio-associated migratory cell	342	20	4.24911e-28	0.7235
28360	c21792_g1_i1	angio-associated migratory cell	456	20	7.20477e-42	0.6185
20433	c13675_g1_i1	angiomotin	976	12	1.29249e-13	0.4533
37171	c30797_g1_i1	angiomotin	341	20	1.76762e-32	0.736
7421	c34068_g1_i1	angiomotin-like protein 1-like	266	20	4.34717e-11	0.691
37554	c31194_g1_i1	angiomotin-like protein 1-like	454	19	3.12442e-08	0.7768
30475	c23967_g1_i1	angiopoietin-related protein 4	301	20	7.53689e-18	0.6095
31569	c25074_g1_i1	angiopoietin-related protein 7	455	20	8.96275e-27	0.562
24401	c17745_g1_i1	ank repeat-containing	328	20	2.1898e-39	0.599
2441	c2622_g1_i1	ankyrin	793	20	2.92519e-10	0.5235
29658	c23147_g1_i1	ankyrin repeat	344	20	5.59059e-17	0.5595
24587	c17933_g1_i1	ankyrin repeat and btb poz domain-containing protein 1	209	20	4.49986e-12	0.689
35820	c29424_g1_i1	ankyrin repeat and kh domain-containing protein mask- partial	1006	20	3.42358e-173	0.9095
16219	c9373_g1_i1	ankyrin repeat and mynd domain-containing protein 2	388	20	2.28167e-20	0.658
18398	c11610_g1_i1	ankyrin repeat and mynd domain-containing protein 2-like	220	20	2.04893e-15	0.6555
23203	c16499_g1_i1	ankyrin repeat and mynd domain-containing protein 2-like	246	20	7.6047e-10	0.5825
11825	c38579_g1_i1	ankyrin repeat and sam domain-containing protein 1a-like	225	20	1.44565e-32	0.821
24400	c17744_g1_i1	ankyrin repeat and sam domain-containing protein 3	227	20	2.54684e-14	0.639
11785	c38537_g1_i1	ankyrin repeat and zinc finger domain-containing protein 1-like	214	12	1.379e-10	0.7225
11499	c38236_g1_i1	ankyrin repeat domain protein	225	20	2.31555e-15	0.673
17544	c10731_g1_i1	ankyrin repeat domain protein	347	3	4.05969e-06	0.76
5191	c5575_g1_i1	ankyrin repeat domain-containing protein 13b-like	4046	20	0	0.712
715	c783_g1_i1	ankyrin repeat domain-containing protein 17	3830	20	6.8752e-49	0.88
716	c783_g1_i2	ankyrin repeat domain-containing protein 17	3683	20	6.07468e-49	0.88
12803	c6409_g4_i1	ankyrin repeat domain-containing protein 17	3315	20	0	0.748
12806	c6409_g4_i3	ankyrin repeat domain-containing protein 17	3393	20	0	0.707
38257	c31913_g1_i1	ankyrin repeat domain-containing protein 17	444	20	2.54992e-65	0.885
21732	c14996_g1_i1	ankyrin repeat domain-containing protein 27-like	299	20	2.85672e-16	0.604
36400	c30016_g1_i1	ankyrin repeat family a protein 2-like	569	20	3.19849e-17	0.5935
31398	c24902_g1_i1	ankyrin repeat ph and sec7 domain containing protein	228	20	7.42858e-11	0.634
4822	c5219_g1_i1	ankyrin repeat protein	4789	20	3.81634e-81	0.496
4824	c5219_g1_i2	ankyrin repeat protein	5596	20	8.49815e-81	0.496
8611	c35272_g1_i1	ankyrin repeat protein	605	20	7.39178e-16	0.5175
14645	c7776_g1_i1	ankyrin repeat protein	529	20	1.50917e-19	0.5135
18196	c11406_g1_i1	ankyrin repeat protein	222	20	6.38317e-08	0.66
2443	c2623_g1_i2	ankyrin repeat-containing	1291	20	1.23931e-34	0.6765
15507	c8650_g1_i1	ankyrin repeat-containing	415	5	1.83228e-07	0.512
20269	c13507_g1_i1	ankyrin repeat-containing	807	20	2.90386e-32	0.7455
33922	c27490_g1_i1	ankyrin repeat-rich membrane-spanning protein	263	20	6.41122e-08	0.574
35811	c29414_g1_i1	ankyrin repeat-rich membrane-spanning protein	364	20	1.86652e-13	0.5705
4298	c4733_g1_i1	ankyrin sam and basic leucine zipper domain-containing protein 1	2377	20	7.25271e-114	0.523
4299	c4733_g1_i2	ankyrin sam and basic leucine zipper domain-containing protein 1	2466	20	2.43914e-113	0.523
4907	c5295_g1_i1	ankyrin unc44	8721	20	0	0.8315
4908	c5295_g1_i2	ankyrin unc44	10368	20	0	0.8315
4909	c5295_g1_i3	ankyrin unc44	8577	20	0	0.8315
4910	c5295_g1_i4	ankyrin unc44	8790	20	0	0.8315
4911	c5295_g1_i5	ankyrin unc44	8646	20	0	0.8315
4912	c5295_g1_i6	ankyrin unc44	10501	20	0	0.8315
4913	c5295_g1_i7	ankyrin unc44	8779	20	0	0.8315
12666	c6381_g4_i1	ankyrin unc44	481	20	2.36308e-17	0.634
13321	c6480_g1_i1	ankyrin unc44	3429	20	4.8946e-92	0.565
13326	c6480_g1_i2	ankyrin unc44	3447	20	3.16911e-111	0.59
13342	c6481_g6_i2	ankyrin unc44	1484	20	1.87584e-37	0.467
34720	c28312_g1_i1	annexin b11 isoform a	1771	20	5.91365e-107	0.69
15666	c8811_g1_i1	annulin-like isoform 1	373	20	2.67964e-62	0.816
15634	c8779_g1_i1	anopheles gambiae pest agap012902-pa	560	20	5.1869e-30	0.642
18830	c12059_g1_i1	anopheles stephensi ubiquitin	485	20	7.66927e-88	0.9775
7958	c34611_g1_i1	anti-lipopolysaccharide factor	520	20	8.12654e-35	0.7915
37218	c30848_g1_i1	anti-lipopolysaccharide factor	392	20	2.34384e-44	0.753
37851	c31493_g1_i1	anti-lipopolysaccharide factor	207	20	4.84937e-22	0.629
21216	c14470_g1_i1	antimicrobial peptide type 2 precursor iic	572	3	1.85472e-08	0.59
34594	c28184_g1_i1	antiviral helicase	456	20	5.08965e-84	0.893
3641	c4015_g2_i1	antiviral protein	853	20	2.29908e-22	0.481
13455	c6575_g1_i1	aortic smooth muscle	229	2	7.36353e-07	0.7
13646	c6767_g1_i1	ap-1 complex subunit beta-1	899	20	1.50446e-168	0.9685
7306	c33955_g1_i1	ap-1 complex subunit gamma-1	1211	20	2.58204e-83	0.625
30501	c23993_g1_i1	ap-1 complex subunit gamma-1	217	16	2.82472e-08	0.7619
24439	c17783_g1_i1	ap-1 complex subunit mu-1-like	597	20	6.12129e-134	0.9655
35867	c29473_g1_i1	ap-1 complex subunit mu-1-like	511	20	1.41638e-73	0.8915
35914	c29520_g1_i1	ap-1 complex subunit mu-1-like	600	20	1.02358e-20	0.997
31646	c25152_g1_i1	ap-1 complex subunit sigma-2-like	577	20	9.87043e-64	0.939
34271	c27853_g1_i1	ap-2 complex subunit alpha	250	20	1.73589e-46	0.98
19806	c13038_g1_i1	ap-2 complex subunit alpha-like	1625	20	0	0.737
21471	c14729_g1_i1	ap-2 complex subunit alpha-like	297	20	6.74332e-33	1
25048	c18402_g1_i1	ap-2 complex subunit alpha-like	245	20	3.58189e-46	0.982
35551	c29151_g1_i1	ap-2 complex subunit beta-	1054	20	0	0.9615
34770	c28362_g1_i1	ap-2 complex subunit beta-like	1089	20	1.6097e-109	0.727
26277	c19653_g1_i1	ap-2 complex subunit sigma-like	973	20	4.98137e-93	0.958
7686	c34335_g1_i1	ap2-associated protein kinase 1	811	20	6.23756e-130	0.815
22471	c15748_g1_i1	ap-3 complex subunit beta-2	238	20	4.86998e-28	0.775
17027	c10198_g1_i1	ap-3 complex subunit delta-1	221	20	1.88585e-37	0.9445
17698	c10893_g1_i1	ap-3 complex subunit delta-1	308	20	1.8868e-17	0.6025
36515	c30130_g1_i1	ap-3 complex subunit delta-1	283	11	9.83829e-07	0.6936
20930	c14180_g1_i1	ap-3 complex subunit delta-1 isoform x2	219	20	3.31756e-43	0.914
18128	c11337_g1_i1	ap-3 complex subunit delta-1-like	252	20	9.93993e-16	0.717
28197	c21624_g1_i1	ap-3 complex subunit delta-1-like	436	20	2.2637e-81	0.965
2016	c2146_g1_i1	ap-3 complex subunit mu-1	324	20	6.89977e-32	0.851
30519	c24011_g1_i1	ap-3 complex subunit mu-1-like	1059	20	0	0.909
2760	c2971_g1_i1	ap-3 complex subunit sigma-2-like	232	20	1.09895e-37	0.993
2761	c2971_g1_i2	ap-3 complex subunit sigma-2-like	213	20	9.62751e-30	0.953
31595	c25100_g1_i1	ap-3 complex subunit sigma-2-like	562	20	4.11246e-73	0.951
834	c891_g1_i1	ap-4 complex subunit beta-1	398	20	8.16285e-25	0.655
1990	c2115_g1_i1	ap-4 complex subunit mu-1-like isoform x1	675	20	3.08528e-14	0.4595
7324	c33972_g1_i1	ap-4 complex subunit sigma-1	747	20	4.97373e-24	0.601
13239	c6465_g2_i1	ap-like endonuclease reverse transcriptase	2200	20	8.84354e-72	0.462
13242	c6465_g2_i2	ap-like endonuclease reverse transcriptase	1293	20	1.6104e-57	0.5195
9405	c36085_g1_i1	apolipoprotein d	571	20	4.28858e-47	0.556
17920	c11123_g1_i1	apolipoprotein d	207	20	1.67988e-10	0.582
948	c1020_g1_i1	apolipoprotein o-like	1445	20	1.78496e-31	0.5405
27156	c20559_g1_i1	apoptogenic protein mitochondrial	263	20	1.12409e-08	0.62
34965	c28557_g1_i1	apoptogenic protein mitochondrial-like	502	20	6.99188e-15	0.6985
35765	c29368_g1_i1	apoptosis inhibitor 5	543	20	3.54682e-31	0.6365
14825	c7960_g1_i1	apoptosis inhibitor 5-like	427	20	2.61523e-73	0.736
13407	c6527_g1_i1	apoptosis regulator r1-like	747	20	1.4343e-19	0.577
17513	c10699_g1_i1	apoptosis stimulating of	353	20	8.90316e-37	0.8295
14752	c7886_g1_i1	apoptosis stimulating of p53	607	20	8.39507e-40	0.647
34369	c27957_g1_i1	apoptosis-inducing factor 3-like isoform x2	283	20	3.11565e-20	0.692
19212	c12440_g1_i1	apoptosis-inducing factor mitochondrial-like	3000	20	0	0.774
29328	c22812_g1_i1	apoptosis-linked protein 2	1336	20	7.60517e-67	0.746
1814	c1938_g1_i1	apoptotic chromatin condensation inducer in the nucleus	3203	20	3.30316e-46	0.5785
15797	c8944_g1_i1	apoptotic chromatin condensation inducer in the nucleus-like	202	5	2.75748e-09	0.702
26665	c20051_g1_i1	aprataxin	655	20	1.00129e-67	0.6835
4709	c5120_g1_i1	apurinic apyrimidinic endonuclease 1	2507	20	8.31675e-119	0.7435
4710	c5120_g1_i2	apurinic apyrimidinic endonuclease 1	2316	20	1.69801e-119	0.7435
18988	c12214_g1_i1	aquaporin 1	514	2	1.82978e-14	0.865
33094	c26633_g1_i1	aquaporin 1	331	2	9.4303e-08	0.75
26686	c20072_g1_i1	aquaporin transporter	238	20	1.40571e-18	0.6615
24776	c18126_g1_i1	arc42	860	20	1.0801e-133	0.8535
14345	c7473_g1_i1	arf gtpase-activating protein git2-like	311	20	4.28482e-18	0.802
28623	c22070_g1_i1	arf-gap domain and fg repeats-containing protein 2-like	319	20	5.88781e-50	0.8435
27263	c20668_g1_i1	arf-gap with coiled- ank repeat and ph domain-containing protein 2-like	311	20	3.9226e-14	0.524
10460	c37164_g1_i1	arf-gap with dual ph domain-containing protein 1-like	286	20	4.0245e-44	0.7225
30393	c23886_g1_i1	arf-gap with dual ph domain-containing protein 1-like	302	20	5.91307e-55	0.7415
32932	c26466_g1_i1	arginase isoform cra_a	208	20	3.17266e-09	0.664
17974	c11178_g1_i1	arginase- mitochondrial	248	20	4.57473e-15	0.7425
6736	c33386_g1_i1	arginine kinase	1443	20	0	0.967
867	c927_g1_i1	arginine serine-rich coiled-coil protein 2	993	20	2.7482e-13	0.8595
868	c927_g1_i2	arginine serine-rich coiled-coil protein 2	1119	20	4.5591e-13	0.8485
1892	c2019_g1_i1	arginine serine-rich coiled-coil protein 2-like isoform x2	449	20	6.97418e-09	0.7625
1848	c1969_g1_i2	arginine--trna cytoplasmic	1810	20	0	0.769
1847	c1969_g1_i1	arginine--trna cytoplasmic-like	2037	20	0	0.7395
2373	c2556_g1_i1	argininosuccinate lyase	1887	20	0	0.744
34978	c28570_g1_i1	arginyl-trna synthetase	613	20	4.24377e-68	0.7
16884	c10050_g1_i1	arginyl-trna--protein transferase 1	303	20	1.70399e-48	0.8275
20497	c13739_g1_i1	argonaute 1	257	20	2.26779e-37	0.939
28969	c22434_g1_i1	argonaute 1	254	20	1.33924e-48	0.979
29956	c23447_g1_i1	argonaute 1	561	20	7.34482e-129	0.961
30754	c24250_g1_i1	argonaute 1	206	20	5.39532e-42	0.991
10779	c37495_g1_i1	argonaute 2	337	3	3.75722e-12	0.5867
34934	c28526_g1_i1	argonaute 2	484	20	1.38356e-62	0.746
21550	c14811_g1_i1	argonaute- partial	304	20	8.91813e-62	0.9665
37538	c31177_g1_i1	ariadne ubiquitin-conjugating enzyme e2 binding protein	347	20	1.31996e-69	0.9675
1066	c1125_g1_i1	armadillo segment polarity	3310	20	0	0.845
6467	c33099_g1_i1	armadillo-type fold containing protein	308	20	9.46622e-20	0.6195
4890	c5279_g1_i1	armet-like protein precursor	1233	20	5.04603e-55	0.791
21327	c14582_g1_i1	arp2 3 complex subunit arpc5	275	20	1.41603e-20	0.6765
12228	c6235_g1_i2	arsenical pump-driving atpase	1104	20	7.32802e-112	0.8755
18773	c12002_g1_i1	arsenite-resistance protein 2-like protein	1303	20	1.61354e-65	0.782
34943	c28535_g1_i1	arthrodial cuticle protein	1275	20	9.36558e-36	0.6935
10490	c37194_g1_i1	arylalkylamine n-acetyltransferase 4 isoform partial	420	9	6.88416e-07	0.5567
25191	c18547_g1_i1	arylsulfatase a	261	20	2.72672e-13	0.689
32176	c25693_g1_i1	arylsulfatase b	360	20	6.29071e-10	0.591
10174	c36872_g1_i1	arylsulfatase b-like	222	20	1.82479e-14	0.7185
28763	c22223_g1_i1	arylsulfatase j-like	208	1	5.65571e-06	0.61
20610	c13854_g1_i1	arylsulfatase partial	318	20	2.98138e-20	0.7415
7299	c33948_g1_i1	asialoglycoprotein receptor 2	606	20	1.04577e-49	0.5415
11524	c38262_g1_i1	asparagine synthetase domain-containing protein 1	232	20	2.58043e-20	0.8535
37467	c31103_g1_i1	asparagine synthetase domain-containing protein 1-like	327	20	1.48433e-18	0.593
25562	c18922_g1_i1	asparagine--trna cytoplasmic-like	302	20	3.1041e-17	0.8115
29800	c23289_g1_i1	asparaginyl-trna cytoplasmic-like	715	20	5.10647e-120	0.8455
16952	c10121_g1_i1	aspartate beta-hydroxylase domain-containing protein 2	231	20	4.36306e-10	0.501
22335	c15610_g1_i1	aspartate beta-hydroxylase domain-containing protein 2	220	20	9.8681e-17	0.612
13869	c6991_g1_i1	aspartate mitochondrial	2178	20	0	0.8375
13870	c6991_g1_i2	aspartate mitochondrial	3222	20	0	0.8375
30793	c24290_g1_i1	aspartate--trna cytoplasmic-like	2089	20	0	0.799
2945	c3174_g1_i1	aspartate--trna mitochondrial	517	20	6.59745e-66	0.7495
7939	c34591_g1_i1	aspartate--trna mitochondrial	238	20	2.47403e-13	0.5755
31817	c25326_g1_i1	aspartate--trna mitochondrial	429	20	8.65256e-33	0.7065
2946	c3174_g1_i2	aspartate--trna mitochondrial-like	259	20	1.47507e-18	0.745
13650	c6771_g1_i1	aspartyl asparaginyl beta-hydroxylase	2064	20	2.16462e-168	0.6585
35633	c29234_g1_i1	aspartyl-trna synthetase	999	20	1.71308e-121	0.8125
29899	c23389_g1_i1	astakine 2a	275	5	2.19009e-08	0.704
37595	c31235_g1_i1	astakine variant 2	500	20	2.21355e-19	0.5395
27693	c21108_g1_i1	asteroid cg4426-pa	291	2	1.75613e-07	0.555
9382	c36061_g1_i1	asx	202	20	1.39335e-20	0.818
38815	c32488_g1_i1	at4g01020-like partial	309	20	1.65153e-30	0.7185
9047	c35718_g1_i1	ataxin-2-like protein	1293	20	2.48611e-72	0.6265
7462	c34109_g1_i1	ataxin-7-like protein 3 isoform x1	400	20	4.63738e-18	0.6625
29805	c23294_g1_i1	atherin-like isoform x1	268	20	1.74971e-11	0.621
29119	c22599_g1_i1	atlastin-like isoform x1	2468	20	1.34932e-178	0.6915
19888	c13123_g1_i1	atp synthase	1101	20	1.33593e-97	0.736
36247	c29860_g1_i1	atp synthase	272	20	1.15674e-59	0.977
33423	c26971_g1_i1	atp synthase beta	341	20	2.59348e-58	0.8855
9040	c35711_g1_i1	atp synthase delta mitochondrial	1038	20	2.19191e-71	0.8035
24215	c17559_g1_i1	atp synthase e chain	501	20	7.92328e-27	0.701
24468	c17812_g1_i1	atp synthase lipid-binding mitochondrial	777	20	1.15878e-26	0.866
1282	c1368_g1_i1	atp synthase mitochondrial f1 complex assembly factor 1	1060	20	8.43631e-77	0.649
6421	c33051_g1_i1	atp synthase mitochondrial f1 complex assembly factor 2	211	20	1.25894e-10	0.692
26243	c19619_g1_i1	atp synthase mitochondrial f1 complex assembly factor 2-like	322	20	2.39015e-30	0.718
22220	c15493_g1_i1	atp synthase subunit mitochondrial	350	20	2.86327e-24	0.7305
34970	c28562_g1_i1	atp synthase subunit mitochondrial	2093	20	0	0.917
29380	c22865_g1_i1	atp synthase subunit mitochondrial-like	662	20	3.78301e-49	0.72
14591	c7722_g1_i1	atp synthase subunit s-like protein	977	20	1.04859e-39	0.5875
12227	c6235_g1_i1	atpase asna1 homolog	2161	20	1.84814e-173	0.8725
26098	c19465_g1_i1	atpase family aaa domain-containing protein 1-a-like	350	20	2.83201e-11	0.5765
10167	c36865_g1_i1	atpase family aaa domain-containing protein 1-b-like	414	20	1.17185e-23	0.736
34079	c27652_g1_i1	atpase family aaa domain-containing protein 3	216	20	4.87107e-20	0.738
34121	c27699_g1_i1	atpase family aaa domain-containing protein 3	215	20	2.32422e-16	0.847
13056	c6439_g1_i1	atpase family aaa domain-containing protein 3-like	790	3	1.65763e-07	0.5567
8938	c35608_g1_i1	atpase inhibitor mai- mitochondrial-like	544	20	1.58782e-20	0.798
534	c565_g1_i1	atpase inhibitor-like protein	616	20	8.63943e-24	0.702
38872	c32547_g1_i1	atpase n2b	229	20	2.86115e-23	0.8155
8585	c35246_g1_i1	atpase n2b-like	264	20	1.61066e-22	0.7095
25518	c18877_g1_i1	atp-binding cassette sub-family a member 1	240	20	6.90349e-23	0.717
839	c894_g1_i2	atp-binding cassette sub-family a member 3	1138	20	5.21143e-67	0.7005
8858	c35525_g1_i1	atp-binding cassette sub-family a member 3	561	20	1.46304e-67	0.707
37076	c30699_g1_i1	atp-binding cassette sub-family a member 3	302	20	1.95924e-34	0.787
9809	c36497_g1_i1	atp-binding cassette sub-family a member 3-like	530	20	5.30114e-55	0.691
25767	c19129_g1_i1	atp-binding cassette sub-family a member 3-like	411	20	2.35723e-64	0.842
32761	c26292_g1_i1	atp-binding cassette sub-family a member 3-like	696	20	4.33924e-21	0.548
23516	c16825_g1_i1	atp-binding cassette sub-family b member mitochondrial-like	357	20	1.93457e-35	0.827
9487	c36171_g1_i1	atp-binding cassette sub-family c member sur-like	363	20	2.36425e-10	0.727
14283	c7410_g1_i1	atp-binding cassette sub-family d member 1	404	20	2.9241e-66	0.854
27207	c20611_g1_i1	atp-binding cassette sub-family d member 1	237	20	1.09383e-37	0.8295
23630	c16948_g1_i1	atp-binding cassette sub-family d member 2-like	225	20	2.89522e-18	0.79
17525	c10711_g1_i1	atp-binding cassette sub-family d member 3	205	20	3.95849e-26	0.855
22637	c15921_g1_i1	atp-binding cassette sub-family d member 3	281	20	2.05374e-33	0.771
24535	c17881_g1_i1	atp-binding cassette sub-family d member 3-like	288	20	2.46746e-22	0.667
31294	c24796_g1_i1	atp-binding cassette sub-family d member 3-like	419	20	2.67806e-67	0.8565
31700	c25207_g1_i1	atp-binding cassette sub-family d member 3-like	657	20	3.76814e-83	0.8455
35042	c28635_g1_i1	atp-binding cassette sub-family e member 1	2358	20	0	0.8865
7025	c33674_g1_i1	atp-binding cassette sub-family f member 1-like	1658	20	0	0.873
26454	c19837_g1_i1	atp-binding cassette sub-family f member 1-like	1553	20	2.10897e-54	0.806
12285	c6256_g1_i1	atp-binding cassette sub-family f member 2-like	3182	20	0	0.886
14096	c7221_g1_i1	atp-binding cassette sub-family f member 3-like	706	20	1.15175e-94	0.822
15362	c8503_g1_i1	atp-binding cassette sub-family f member 3-like	493	20	1.71761e-23	0.8585
1089	c1149_g1_i1	atp-binding cassette sub-family g member 1-like	253	20	1.10779e-10	0.7475
15972	c9122_g1_i1	atp-binding cassette sub-family g member 4-like	238	20	7.12727e-34	0.871
25633	c18994_g1_i1	atp-binding cassette superfamily	250	20	4.90012e-32	0.821
6527	c33161_g1_i1	atp-citrate synthase	247	20	9.87758e-44	0.9415
10740	c37455_g1_i1	atp-citrate synthase	473	20	1.05168e-76	0.8975
26778	c20168_g1_i1	atp-citrate synthase	399	20	7.21551e-69	0.88
9613	c36299_g1_i1	atp-citrate synthase-like	353	20	2.24064e-64	0.9285
13513	c6634_g1_i1	atp-citrate synthase-like	1540	20	0	0.792
2758	c2969_g1_i1	atp-dependent clp protease atp-binding subunit clpx- mitochondrial-like	1323	20	6.98973e-149	0.8585
30109	c23600_g1_i1	atp-dependent clp protease atp-binding subunit clpx- mitochondrial-like	886	20	4.6204e-77	0.6795
5278	c5639_g1_i1	atp-dependent clp protease proteolytic mitochondrial-like	912	20	1.13505e-111	0.8525
22357	c15633_g1_i1	atpdependent dna helicase 70 kda subunit superfamily protein	203	10	6.02886e-08	0.675
16993	c10163_g1_i1	atp-dependent dna helicase q1	398	20	3.8306e-38	0.6615
1161	c1224_g1_i1	atp-dependent helicase brm-like	1182	20	2.2258e-135	0.7785
6654	c33297_g1_i1	atp-dependent helicase brm-like	212	20	2.51577e-18	0.8195
17113	c10285_g1_i1	atp-dependent helicase brm-like	333	20	9.70043e-62	0.902
29225	c22705_g1_i1	atp-dependent helicase brm-like	1413	20	3.80458e-14	0.5195
34963	c28555_g1_i1	atp-dependent helicase brm-like	302	20	2.71819e-47	0.858
36878	c30495_g1_i1	atp-dependent helicase brm-like	689	20	9.47043e-73	0.897
13909	c7030_g1_i1	atp-dependent -nad h-hydrate dehydratase-like isoform x2	1213	20	9.67798e-98	0.6625
10122	c36818_g1_i1	atp-dependent protease la	216	20	6.27322e-28	0.826
18837	c12065_g1_i1	atp-dependent protease la	1540	20	0	0.836
19416	c12645_g1_i1	atp-dependent rna	238	20	1.63872e-21	0.7465
32162	c25679_g1_i1	atp-dependent rna	224	20	3.40929e-11	0.6175
34217	c27797_g1_i1	atp-dependent rna helicase	232	20	2.80236e-36	0.8935
6543	c33177_g1_i1	atp-dependent rna helicase a	222	20	7.38777e-23	0.7865
30952	c24450_g1_i1	atp-dependent rna helicase a	233	20	1.15308e-20	0.773
33465	c27014_g1_i1	atp-dependent rna helicase a	285	20	1.6293e-43	0.915
31017	c24515_g1_i1	atp-dependent rna helicase abstrakt	842	20	1.09645e-37	0.7615
16471	c9627_g1_i1	atp-dependent rna helicase abstrakt-like	317	20	1.7554e-48	0.8325
19542	c12771_g1_i1	atp-dependent rna helicase abstrakt-like	788	20	7.30086e-143	0.86
30163	c23655_g1_i1	atp-dependent rna helicase abstrakt-like	809	20	6.04717e-17	0.9295
2756	c2964_g1_i1	atp-dependent rna helicase a-like	377	20	1.61905e-31	0.826
33813	c27378_g1_i1	atp-dependent rna helicase a-like	328	20	4.5457e-32	0.7115
36791	c30406_g1_i1	atp-dependent rna helicase a-like	237	20	1.13945e-26	0.791
19329	c12558_g1_i1	atp-dependent rna helicase ddx1-like	2074	20	0	0.81
13760	c6882_g1_i1	atp-dependent rna helicase ddx24	935	20	2.60286e-78	0.692
34855	c28446_g1_i1	atp-dependent rna helicase ddx24	374	20	4.61373e-15	0.744
23982	c17324_g1_i1	atp-dependent rna helicase ddx24-like	823	20	2.45364e-68	0.599
1783	c1911_g1_i1	atp-dependent rna helicase ddx3x isoform x2	5502	20	0	0.794
25352	c18710_g1_i1	atp-dependent rna helicase ddx42-like	1608	20	5.09256e-90	0.7125
26484	c19867_g1_i1	atp-dependent rna helicase ddx42-like	1470	20	0	0.8075
33528	c27079_g1_i1	atp-dependent rna helicase ddx46-like partial	241	20	3.02439e-35	0.92
22389	c15666_g1_i1	atp-dependent rna helicase ddx54	238	20	1.24388e-37	0.915
13929	c7050_g1_i1	atp-dependent rna helicase ddx54-like	2207	20	6.67591e-152	0.643
19398	c12627_g1_i1	atp-dependent rna helicase ddx55	2166	20	0	0.7175
19187	c12414_g1_i1	atp-dependent rna helicase dhx30	321	20	1.98174e-17	0.637
24497	c17842_g1_i1	atp-dependent rna helicase dhx30 isoform x2	344	2	4.62778e-08	0.5
33474	c27023_g1_i1	atp-dependent rna helicase dhx30 isoform x2	331	20	1.11464e-11	0.6445
21639	c14901_g1_i1	atp-dependent rna helicase dhx30-like	402	20	1.15186e-43	0.7595
27624	c21037_g1_i1	atp-dependent rna helicase dhx33	202	20	4.9679e-21	0.816
21169	c14423_g1_i1	atp-dependent rna helicase dhx8	285	20	1.12227e-34	0.96
16679	c9839_g1_i1	atp-dependent rna helicase has1	470	20	9.40327e-27	0.6385
2524	c2700_g1_i1	atp-dependent rna helicase me31b-like	1350	20	0	0.901
34918	c28510_g1_i1	atp-dependent rna helicase me31b-like	854	20	8.97447e-64	0.9125
1784	c1911_g1_i2	atp-dependent rna helicase pl10-like	5607	20	0	0.837
13478	c6598_g1_i1	atp-dependent rna helicase suv3 mitochondrial-like	710	20	1.48651e-100	0.815
19289	c12517_g1_i1	atp-dependent transporter	728	20	2.64444e-125	0.8435
27737	c21153_g1_i1	at-rich interactive domain-containing protein 2	341	20	3.05701e-24	0.696
36131	c29742_g1_i1	at-rich interactive domain-containing protein 2-like	483	20	6.68139e-46	0.693
25510	c18869_g1_i1	at-rich interactive domain-containing protein 4b	219	20	2.49457e-16	0.7435
34232	c27812_g1_i1	at-rich interactive domain-containing protein 4b	210	20	1.41265e-25	0.8205
38415	c32076_g1_i1	at-rich interactive domain-containing protein 4b	304	18	6.53596e-11	0.7494
19239	c12468_g1_i1	at-rich interactive domain-containing protein 4b isoform x4	268	5	5.55495e-06	0.794
9286	c35963_g1_i1	attractin-like protein 1-like	422	20	6.89372e-13	0.8925
8497	c35154_g1_i1	aurora kinase a	2396	20	8.2117e-132	0.761
33338	c26884_g1_i1	autophagy protein 5	286	20	1.72161e-44	0.7165
29493	c22981_g1_i1	autophagy related protein atg6	514	20	1.41362e-28	0.653
18788	c12017_g1_i1	autophagy-related protein 101-like	858	20	2.68232e-105	0.8095
8400	c35057_g1_i1	autophagy-related protein 13 homolog	316	20	4.46113e-27	0.698
32117	c25632_g1_i1	autophagy-related protein 13 homolog	468	20	1.10625e-17	0.6375
22643	c15928_g1_i1	autophagy-related protein 2 homolog a	333	20	2.09924e-21	0.6115
34696	c28287_g1_i1	autophagy-related protein 2 homolog a	758	20	6.66734e-47	0.549
8667	c35329_g1_i1	autophagy-related protein 2 homolog a-like	224	20	4.13357e-19	0.8565
16242	c9396_g1_i1	autophagy-related protein 2 homolog b	402	20	1.95779e-08	0.8625
20748	c13993_g1_i1	autophagy-related protein 2 homolog b	452	20	1.59885e-56	0.7715
22866	c16153_g1_i1	autophagy-related protein 2 homolog b-like	510	20	5.80839e-30	0.6775
33421	c26969_g1_i1	autophagy-related protein 2 homolog b-like	203	20	2.94381e-19	0.7585
6762	c33411_g1_i1	autophagy-related protein 2-like protein b	538	20	2.75852e-20	0.52
20825	c14070_g1_i1	autophagy-related protein 9a	298	20	1.7129e-35	0.7725
23956	c17298_g1_i1	autophagy-related protein 9a	1090	20	2.22875e-64	0.559
25331	c18689_g1_i1	autophagy-related protein 9a	368	20	3.52039e-58	0.8265
25807	c19170_g1_i1	autophagy-related protein 9a	239	20	1.69443e-16	0.784
35157	c28750_g1_i1	autophagy-related protein 9a	389	20	2.1764e-28	0.6355
23381	c16686_g1_i1	autophagy-specific gene 2	402	20	7.29731e-26	0.576
30716	c24212_g1_i1	autophagy-specific gene 6	871	20	1.36345e-111	0.7885
31239	c24738_g1_i1	axis inhibition protein	502	20	2.36476e-15	0.771
2233	c2409_g1_i1	b chain kynurenine aminotransferase ii inhibitors	608	20	1.8584e-63	0.6355
27002	c20400_g1_i1	b chain kynurenine aminotransferase ii inhibitors	579	20	5.47286e-46	0.5905
16292	c9447_g1_i1	b chain snapshots of the rna processing factor scaf8 bound to different phosphorylated forms of the carboxy-terminal domain of rna-polymerase ii	264	20	1.34996e-25	0.8995
18033	c11238_g1_i1	b( +)-type amino acid transporter 1-like	332	20	1.31844e-22	0.7265
13615	c6736_g1_i1	b9 domain-containing protein 1	232	20	8.68766e-14	0.76
1436	c1544_g1_i1	baculoviral iap repeat-containing protein 6	809	4	6.97075e-08	0.715
7697	c34346_g1_i1	baculoviral iap repeat-containing protein 6	744	20	1.19568e-24	0.4835
18010	c11214_g1_i1	baculoviral iap repeat-containing protein 6	206	10	1.10556e-08	0.643
20794	c14039_g1_i1	baculoviral iap repeat-containing protein 6	675	20	2.37564e-39	0.562
24909	c18259_g1_i1	baculoviral iap repeat-containing protein 6	474	20	2.24536e-16	0.4795
25068	c18422_g1_i1	baculoviral iap repeat-containing protein 6	534	20	1.09128e-11	0.56
26300	c19676_g1_i1	baculoviral iap repeat-containing protein 6	342	20	4.36634e-08	0.7065
31773	c25281_g1_i1	baculoviral iap repeat-containing protein 6	864	20	4.47698e-36	0.517
34849	c28440_g1_i1	baculoviral iap repeat-containing protein 6	237	20	2.56321e-08	0.74
37293	c30925_g1_i1	baculoviral iap repeat-containing protein 6	206	4	3.12477e-11	0.6525
38436	c32097_g1_i1	baculoviral iap repeat-containing protein 6	207	20	1.42831e-07	0.717
7733	c34383_g1_i1	baculoviral iap repeat-containing protein 6-like	386	20	5.03406e-12	0.6675
18835	c12063_g1_i1	baculoviral iap repeat-containing protein 6-like	644	20	9.72328e-29	0.675
22302	c15577_g1_i1	baculoviral iap repeat-containing protein 6-like	298	20	1.14061e-13	0.663
3772	c4163_g1_i1	bag family molecular chaperone regulator 3	2605	20	1.04015e-14	0.6625
3773	c4163_g1_i2	bag family molecular chaperone regulator 3	2393	20	9.18615e-15	0.6625
14340	c7468_g1_i1	bahcc1 partial	1044	20	2.54251e-57	0.792
37612	c31252_g1_i1	band -like protein 5	334	20	3.88671e-45	0.794
21484	c14742_g1_i1	band -like protein 5-like	464	20	8.82259e-39	0.7035
6658	c33301_g1_i1	bardet-biedl syndrome 1 protein	249	20	1.33855e-38	0.86
33853	c27418_g1_i1	bardet-biedl syndrome 1 protein	232	20	9.23999e-15	0.728
26799	c20190_g1_i1	bardet-biedl syndrome 4	221	20	3.48925e-22	0.7645
13937	c7058_g1_i1	barrier-to-autointegration factor	2574	20	8.9528e-56	0.8775
33035	c26571_g1_i1	barrier-to-autointegration factor	660	20	2.63758e-49	0.8785
14082	c7207_g1_i1	basement membrane-specific heparan sulfate proteoglycan core	276	20	1.05911e-14	0.596
30584	c24079_g1_i1	basement membrane-specific heparan sulfate proteoglycan core isoform x3	859	6	1.53951e-06	0.46
2997	c3235_g1_i2	basic helix-loop-helix protein	785	20	1.69798e-24	0.8955
17686	c10880_g1_i1	Basigin precursor, putative	405	2	1.33306e-13	0.53
1189	c1252_g1_i1	b-box type zinc finger protein ncl-1-like	845	20	7.88949e-29	0.559
1190	c1252_g1_i2	b-box type zinc finger protein ncl-1-like	777	20	4.67261e-29	0.5565
18743	c11972_g1_i1	b-box zinc finger family protein	538	20	5.03594e-10	0.5565
905	c965_g1_i2	bbsome-interacting protein 1-like	485	20	3.76337e-14	0.7725
35592	c29194_g1_i1	b-cell cll lymphoma 6 member b	424	20	7.95265e-33	0.677
23302	c16602_g1_i1	b-cell cll lymphoma 7 protein family member b-like	405	20	3.21408e-33	0.728
33296	c26841_g1_i1	b-cell lymphoma	210	20	2.0798e-14	0.9135
1040	c1104_g1_i1	bcl2 adenovirus e1b 19 kda protein-interacting protein 3-like	3439	20	2.08939e-51	0.721
2606	c2785_g1_i1	bcr-associated bap	1821	20	4.55613e-54	0.6525
20856	c14104_g1_i1	beat protein	1118	20	3.33463e-48	0.5615
38650	c32316_g1_i1	beat protein	418	20	3.11633e-09	0.687
21650	c14912_g1_i1	bestrophin 2	233	20	1.80152e-09	0.599
273	c280_g1_i1	bestrophin isoform a	1237	20	3.81468e-96	0.6625
8394	c35051_g1_i1	bestrophin isoform a	238	20	2.57515e-16	0.684
27998	c21419_g1_i1	beta 1	243	20	6.81198e-23	0.9045
11957	c6116_g1_i1	beta actin	357	20	6.60474e-80	0.9745
26354	c19730_g1_i1	beta carbonic anhydrase 1-like	229	20	1.82305e-28	0.795
29604	c23092_g1_i1	beta chain spectrin	450	20	6.23129e-51	0.73
25939	c19304_g1_i1	beta- -galactosyltransferase 1	259	20	1.77703e-09	0.5905
37840	c31482_g1_i1	beta- -galactosyltransferase 1	674	20	4.273e-46	0.569
30631	c24125_g1_i1	beta- -galactosyltransferase 1-like	554	12	4.80424e-08	0.6142
38226	c31881_g1_i1	beta- -galactosyltransferase 7-like	678	20	1.6478e-98	0.7795
20197	c13434_g1_i1	beta- -galactosyltransferase brn-like	280	20	5.35064e-24	0.5985
7839	c34491_g1_i1	beta- -glucosyltransferase-like	787	20	1.72948e-70	0.6015
19951	c13186_g1_i1	beta lysosomal	549	20	3.1026e-38	0.648
885	c943_g1_i1	beta- -n-acetylgalactosaminyltransferase bre-4-like	1484	20	2.53247e-82	0.6515
886	c943_g1_i2	beta- -n-acetylgalactosaminyltransferase bre-4-like	1662	20	1.22103e-81	0.6515
35492	c29091_g1_i1	beta- -n-acetylglucosaminyltransferase radical	475	20	3.39601e-85	0.8075
32211	c25729_g1_i1	beta-2-syntrophin	255	20	1.96271e-18	0.65
33502	c27051_g1_i1	beta-2-syntrophin	544	20	1.05397e-28	0.557
24218	c17562_g1_i1	beta-actin	223	20	4.79721e-45	0.9725
7747	c34397_g1_i1	beta-adrenergic receptor kinase	219	20	5.58593e-39	0.8785
9527	c36211_g1_i1	beta-arrestin 1	665	20	1.14709e-115	0.894
35063	c28656_g1_i1	beta-arrestin 1	647	20	2.55354e-93	0.915
28652	c22100_g1_i1	beta-catenin-like protein 1-like	227	20	3.87058e-18	0.757
25795	c19157_g1_i1	beta-centractin	902	20	3.77507e-176	0.93
16672	c9832_g1_i1	beta-hexosaminidase subunit beta	299	20	1.67707e-41	0.7625
20968	c14219_g1_i1	beta-hexosaminidase subunit beta-like	252	20	5.83844e-23	0.6755
24376	c17720_g1_i1	beta-hexosaminidase subunit beta-like	207	5	7.85058e-07	0.602
4732	c5141_g1_i1	beta-lactamase-like protein 2-like	791	20	7.10826e-62	0.6895
4733	c5141_g1_i2	beta-lactamase-like protein 2-like	1073	20	2.62482e-96	0.708
4734	c5141_g1_i3	beta-lactamase-like protein 2-like	892	20	7.05608e-83	0.7115
33590	c27143_g1_i1	beta-mannosidase	233	20	9.03737e-27	0.733
34931	c28523_g1_i1	beta-mannosidase	294	20	5.53624e-28	0.6835
34639	c28230_g1_i1	beta-parvin-like isoform x1	2027	20	6.22215e-147	0.8165
38130	c31781_g1_i1	beta-secretase 1 isoform x2	551	20	3.52517e-32	0.627
32411	c25933_g1_i1	beta-tubulin	218	20	2.03685e-44	0.989
7609	c34258_g1_i1	bhlh factor	521	20	4.47376e-37	0.84
3764	c4155_g2_i1	bhlhzip transcription factor max bigmax	951	20	1.17511e-48	0.8365
20056	c13292_g1_i1	bicoid stability factor	4107	20	0	0.5765
23371	c16676_g1_i1	bicoid stability factor	449	20	2.47568e-10	0.5405
10463	c37167_g1_i1	bifunctional 3 -phosphoadenosine 5 -phosphosulfate synthase 2	212	20	5.34516e-36	0.888
30687	c24182_g1_i1	bifunctional 3 -phosphoadenosine 5 -phosphosulfate synthase 2	359	20	2.30256e-47	0.787
34067	c27640_g1_i1	bifunctional 3 -phosphoadenosine 5 -phosphosulfate synthase 2	331	20	3.08123e-46	0.8275
29629	c23118_g1_i1	bifunctional arginine demethylase and lysyl-hydroxylase psr-like	388	20	2.5202e-16	0.698
26258	c19634_g1_i1	bifunctional coenzyme a synthase	230	20	9.13782e-13	0.756
13987	c7109_g1_i1	bifunctional glutamate proline--trna ligase	3490	20	0	0.663
29391	c22876_g1_i1	bifunctional glutamate proline--trna ligase	1115	20	5.02575e-178	0.804
36658	c30272_g1_i1	bifunctional glutamate proline--trna ligase-like isoform x2	222	20	5.78247e-10	0.6175
28934	c22399_g1_i1	bifunctional lysine-specific demethylase and histidyl-hydroxylase no66-like	305	20	6.34441e-46	0.798
9131	c35805_g1_i1	bifunctional methylenetetrahydrofolate dehydrogenase mitochondrial-like	323	20	2.22498e-44	0.781
8148	c34804_g1_i1	bifunctional polynucleotide phosphatase kinase	281	20	2.39004e-29	0.7025
29788	c23277_g1_i1	bifunctional polynucleotide phosphatase kinase-like	778	20	6.52184e-24	0.7425
32241	c25760_g1_i1	bifunctional polynucleotide phosphatase kinase-like	428	20	4.34946e-13	0.485
14225	c7351_g1_i1	bifunctional protein ncoat	1182	20	1.18194e-121	0.6835
22203	c15476_g1_i1	bifunctional protein ncoat	483	20	2.26635e-31	0.9025
33556	c27108_g1_i1	bifunctional protein ncoat	472	20	8.46768e-61	0.713
13534	c6655_g1_i1	bifunctional protein ncoat-like	893	20	2.71459e-32	0.5105
18834	c12062_g1_i1	bifunctional purine biosynthesis protein purh	821	20	9.91761e-101	0.813
24256	c17600_g1_i1	bifunctional purine biosynthesis protein purh-like	1207	20	0	0.8225
30465	c23958_g1_i1	biogenesis of lysosome-related organelles complex 1 subunit 1-like	722	20	2.07682e-41	0.82
25104	c18459_g1_i1	biogenesis of lysosome-related organelles complex 1 subunit 2-like	371	20	7.04876e-42	0.73
9913	c36603_g1_i1	biogenesis of lysosome-related organelles complex 1 subunit 4	570	20	4.61666e-16	0.541
30601	c24096_g1_i1	biotin carboxylase subunit of acetyl carboxylase	321	8	3.16844e-08	0.535
30602	c24096_g1_i2	biotin carboxylase subunit of acetyl carboxylase	303	2	1.20192e-06	0.505
15821	c8968_g1_i1	biotin--protein ligase	241	20	8.60155e-20	0.614
22260	c15534_g1_i1	bip2 cg2009-pa	338	20	4.07059e-28	0.775
15901	c9049_g1_i1	bis(5 -adenosyl)-triphosphatase	287	20	1.23341e-12	0.5275
26075	c19442_g1_i1	bis(5 -nucleosyl)-tetraphosphatase	311	20	8.5084e-28	0.7145
1666	c1801_g1_i1	bladder cancer-associated	1712	20	1.08637e-20	0.824
29505	c22993_g1_i1	blastula protease 10-like	468	20	3.04211e-22	0.493
26033	c19400_g1_i1	bmi1 polycomb ring finger oncogene	753	20	8.77968e-43	0.871
21274	c14529_g1_i1	bmp and activin membrane-bound inhibitor homolog	272	20	2.20542e-09	0.841
21759	c15023_g1_i1	bmp-binding endothelial regulator	239	20	2.05255e-14	0.567
8860	c35527_g1_i1	bmp-induced factor	241	20	2.60707e-14	0.7205
10287	c36988_g1_i1	bola-like protein 1	204	16	2.55864e-08	0.6294
17094	c10266_g1_i1	bola-like protein 2-like	238	20	9.22703e-11	0.837
32571	c26098_g1_i1	bola-like protein 2-like	310	20	3.79313e-18	0.76
6455	c33086_g1_i1	bola-like protein 3-like	270	20	5.66095e-22	0.7245
20131	c13368_g1_i1	bola-like protein ddb_g0274169-like	510	20	3.06714e-32	0.785
1791	c1918_g1_i1	bone morphogenetic protein	1650	20	0	0.839
24178	c17522_g1_i1	bone morphogenetic protein	382	14	4.55719e-09	0.7579
33251	c26796_g1_i1	bone morphogenetic protein	210	20	3.61161e-19	0.8635
16835	c9998_g1_i1	bone morphogenetic protein 1	445	20	4.63673e-30	0.5785
15584	c8727_g1_i1	bone morphogenetic protein receptor type-2	245	20	3.59147e-17	0.637
29392	c22877_g1_i1	bone morphogenetic protein receptor type-2	3090	20	2.21302e-100	0.644
2070	c2211_g1_i1	box c d snorna protein 1-like	458	20	2.87637e-20	0.541
2071	c2211_g1_i2	box c d snorna protein 1-like	508	20	1.40148e-26	0.532
16023	c9174_g1_i1	brahma-like protein	274	20	2.67411e-50	0.9675
33367	c26915_g1_i1	brahma-like protein	266	20	1.55475e-33	0.7965
26348	c19724_g1_i1	brain isoform a	264	20	4.15571e-48	0.929
6516	c33150_g1_i1	brain mitochondrial carrier protein 1 isoform x2	215	20	2.24296e-23	0.79
2025	c2156_g1_i1	brain protein 44	666	20	2.61159e-46	0.8015
13035	c6436_g3_i3	brain protein i3-like	3001	20	1.38173e-19	0.773
13037	c6436_g3_i4	brain protein i3-like	3345	20	1.65882e-19	0.773
32984	c26519_g1_i1	brain tumor	252	15	7.05443e-10	0.7613
2159	c2326_g1_i1	brain tumor protein	297	20	9.3245e-55	0.954
30638	c24132_g1_i1	brain tumor protein	893	20	3.35945e-81	0.6745
27249	c20654_g1_i1	brain-specific homeobox protein	204	4	3.67802e-06	0.5875
3580	c3939_g1_i1	branched chain aminotransferase isoform cra_e	4362	20	1.95891e-148	0.7415
13837	c6959_g1_i1	brca1-a complex subunit bre isoform 3	393	20	9.59254e-14	0.593
25059	c18413_g1_i1	brca1-associated protein	205	20	2.40728e-21	0.7485
10710	c37425_g1_i1	breakpoint cluster region protein	217	20	5.99339e-10	0.679
13979	c7101_g1_i1	breast cancer anti-estrogen resistance protein 1-like	524	20	9.14637e-43	0.7785
6105	c32722_g1_i1	breast carcinoma-amplified sequence 3-like protein	261	20	3.05026e-25	0.715
11607	c38346_g1_i1	brefeldin a-inhibited guanine nucleotide-exchange protein 1	216	20	1.11898e-26	0.75
19090	c12318_g1_i1	brefeldin a-inhibited guanine nucleotide-exchange protein 1-like	241	20	2.51141e-43	0.9435
15214	c8354_g1_i1	brefeldin a-inhibited guanine nucleotide-exchange protein 1-like isoform x2	228	20	2.84216e-07	0.5565
4650	c5083_g1_i3	bridging integrator	2414	20	1.84177e-134	0.7035
18754	c11983_g1_i1	brisc and brca1-a complex member 1-like	372	20	4.39912e-36	0.6455
33526	c27077_g1_i1	brisc and brca1-a complex member 1-like	381	10	4.68177e-09	0.605
27085	c20486_g1_i1	bro1 domain-containing protein brox isoform x3	222	20	7.58687e-17	0.7515
22773	c16058_g1_i1	bro1 domain-containing protein brox-like	217	20	2.47625e-19	0.7225
22140	c15413_g1_i1	broad-complex core protein isoform 6	212	9	1.53748e-09	0.8622
18749	c11978_g1_i1	broad-complex core protein isoforms 1 2 3 4 5	1361	20	6.3231e-43	0.732
33849	c27414_g1_i1	broad-complex core protein isoforms 1 2 3 4 5	217	20	9.87753e-22	0.7095
9124	c35797_g1_i1	broad-complex protein isoform 4	231	3	2.57851e-13	0.7467
15011	c8149_g1_i1	broad-complex protein isoform 4	456	8	6.89387e-08	0.61
18000	c11204_g1_i1	broad-complex protein isoform 4	434	20	8.62292e-20	0.717
23561	c16873_g1_i1	broad-complex protein isoform 4	254	1	4.68437e-28	0.91
25099	c18454_g1_i1	broad-complex protein isoform 4	1211	20	1.45297e-53	0.637
26273	c19649_g1_i1	broad-complex protein isoform 4	812	20	7.6811e-57	0.7025
13789	c6911_g1_i1	broad-complex protein isoform 6 variant 2	958	20	2.65291e-53	0.708
36811	c30427_g1_i1	bromo adjacent homology domain containing	615	20	3.01706e-73	0.756
16673	c9833_g1_i1	bromodomain adjacent to zinc finger domain protein 1a	220	20	1.63197e-19	0.862
27328	c20734_g1_i1	bromodomain adjacent to zinc finger domain protein 1a	291	20	4.02784e-09	0.6505
31244	c24743_g1_i1	bromodomain adjacent to zinc finger domain protein 1a	234	7	4.10894e-09	0.5986
34951	c28543_g1_i1	bromodomain adjacent to zinc finger domain protein 1a	684	20	2.25443e-14	0.732
26773	c20163_g1_i1	bromodomain adjacent to zinc finger domain protein 1a-like	250	20	3.42776e-12	0.602
25346	c18704_g1_i1	bromodomain adjacent to zinc finger domain protein 2b	781	20	7.0452e-75	0.5955
957	c1027_g1_i1	bromodomain adjacent to zinc finger domain protein 2b isoform x5	842	20	1.05604e-19	0.7895
10903	c37624_g1_i1	bromodomain adjacent to zinc finger domain protein 2b-like	445	20	7.67096e-44	0.816
14908	c8044_g1_i1	bromodomain adjacent to zinc finger domain protein 2b-like	456	20	4.65232e-29	0.5475
23082	c16375_g1_i1	bromodomain adjacent to zinc finger domain protein 2b-like	280	20	1.21758e-18	0.7265
15356	c8497_g1_i1	bromodomain and wd repeat-containing protein 1	372	20	6.49141e-43	0.725
958	c1027_g1_i2	bromodomain containing protein	794	20	1.1599e-19	0.779
23366	c16671_g1_i1	bromodomain-containing protein 7	595	20	9.81469e-52	0.6195
35056	c28649_g1_i1	bromodomain-containing protein 7	394	20	9.98081e-24	0.8075
22058	c15330_g1_i1	bromodomain-containing protein 7-like	373	20	3.43979e-12	0.6355
35477	c29076_g1_i1	bromodomain-containing protein 8	1794	20	1.66888e-31	0.6615
17876	c11078_g1_i1	bromodomain-containing protein 8-like isoform x2	246	20	2.8129e-26	0.798
33647	c27206_g1_i1	Bromodomain-containing protein, putative	272	2	6.48263e-09	0.71
6928	c33577_g1_i1	brother of tout-velu	440	20	6.12949e-26	0.6095
24114	c17457_g1_i1	bsd domain-containing protein 1 isoform 1	412	20	2.24105e-19	0.5925
20222	c13459_g1_i1	bsd domain-containing protein 1-like	1066	20	2.75988e-21	0.695
23025	c16318_g1_i1	btb domain containing isoform cra_c	338	2	2.52551e-09	0.72
32317	c25838_g1_i1	btb domain containing isoform cra_c	448	2	2.93896e-15	0.73
19183	c12410_g1_i1	btb poz domain containing protein	523	20	3.68912e-55	0.881
30887	c24385_g1_i1	btb poz domain containing protein	351	20	1.23111e-09	0.5665
29825	c23314_g1_i1	btb poz domain-containing adapter for cul3-mediated degradation protein 3-like	1574	20	5.20006e-154	0.8545
24949	c18300_g1_i1	btb poz domain-containing protein	256	20	3.40537e-25	0.7135
3042	c3286_g1_i1	btb poz domain-containing protein 10	609	20	5.88659e-15	0.861
3043	c3286_g1_i2	btb poz domain-containing protein 10	690	20	1.14625e-14	0.875
15805	c8952_g1_i1	btb poz domain-containing protein 10	302	20	4.2675e-45	0.9145
21761	c15025_g1_i1	btb poz domain-containing protein 10	318	20	2.10112e-27	0.8175
26262	c19638_g1_i1	btb poz domain-containing protein 17-like	210	15	3.09521e-08	0.662
5185	c5568_g1_i1	btb poz domain-containing protein 2-like	3602	20	1.39137e-18	0.463
5193	c5577_g1_i1	btb poz domain-containing protein 2-like	2596	20	1.46324e-71	0.773
5194	c5577_g1_i2	btb poz domain-containing protein 2-like	2620	20	2.69801e-101	0.7865
5195	c5577_g1_i3	btb poz domain-containing protein 2-like	2720	20	2.00317e-132	0.636
14831	c7966_g1_i1	btb poz domain-containing protein 3-like	661	20	4.39685e-119	0.8505
26333	c19709_g1_i1	btb poz domain-containing protein 3-like	337	9	1.76757e-07	0.58
35262	c28858_g1_i1	btb poz domain-containing protein 3-like	599	4	1.57917e-12	0.4425
29765	c23254_g1_i1	btb poz domain-containing protein 6	832	20	6.64553e-19	0.829
10358	c37059_g1_i1	btb poz domain-containing protein kctd16	364	20	9.83014e-45	0.8115
32216	c25735_g1_i1	btb poz domain-containing protein kctd3	383	20	1.86716e-68	0.905
30637	c24131_g1_i1	btb poz domain-containing protein kctd5-like	288	20	1.36562e-13	0.819
28467	c21905_g1_i1	btb poz domain-containing protein kctd9-like	293	20	1.06467e-15	0.732
30522	c24014_g1_i1	btb-protein- isoform e	1488	20	1.66258e-13	0.698
30850	c24348_g1_i1	btb-protein- isoform e	1171	20	1.32266e-54	0.6925
28838	c22299_g1_i1	btb-protein- isoform f	232	14	1.15865e-07	0.5414
19612	c12841_g1_i1	bud13 homolog	610	20	1.18397e-17	0.5555
24194	c17538_g1_i1	bud13 homolog	515	20	6.01886e-25	0.783
35230	c28825_g1_i1	bud13 homolog isoform x2	860	20	2.8534e-31	0.5135
8551	c35210_g1_i1	bullous pemphigoid antigen isoforms 6 9 10	320	20	5.12706e-20	0.689
8571	c35230_g1_i1	bullous pemphigoid antigen isoforms 6 9 10	295	20	1.74451e-15	0.6375
8709	c35372_g1_i1	bullous pemphigoid antigen isoforms 6 9 10	219	20	8.05643e-13	0.6035
14116	c7241_g1_i1	bullous pemphigoid antigen isoforms 6 9 10	735	20	6.73625e-71	0.671
25108	c18463_g1_i1	bullous pemphigoid antigen isoforms 6 9 10	1015	20	2.1739e-135	0.795
26993	c20390_g1_i1	bullous pemphigoid antigen isoforms 6 9 10	250	20	4.30979e-15	0.7285
29177	c22657_g1_i1	bullous pemphigoid antigen isoforms 6 9 10	230	20	3.71627e-18	0.667
29547	c23035_g1_i1	bullous pemphigoid antigen isoforms 6 9 10	358	20	2.4324e-34	0.738
32446	c25970_g1_i1	bullous pemphigoid antigen isoforms 6 9 10	526	20	1.27377e-41	0.661
33797	c27362_g1_i1	bullous pemphigoid antigen isoforms 6 9 10	414	20	3.22776e-38	0.7005
37592	c31232_g1_i1	bullous pemphigoid antigen isoforms 6 9 10	305	20	1.01495e-26	0.691
24506	c17851_g1_i1	bumetanide-sensitive na-k-cl cotransport protein	390	20	5.67136e-69	0.7785
4129	c4535_g1_i2	bumetanide-sensitive sodium- -chloride cotransporter-like	2427	20	0	0.7095
28210	c21637_g1_i1	butyrate induced	262	20	1.10125e-18	0.68
30839	c24337_g1_i1	butyrate induced	908	20	7.61245e-87	0.729
32952	c26487_g1_i1	butyrophilin subfamily 2 member a2-like	241	11	4.34866e-15	0.6564
18373	c11585_g1_i1	bv80 bb- partial	413	20	1.28885e-14	0.451
37071	c30694_g1_i1	bystin-like	1661	20	1.70374e-153	0.7185
6095	c32712_g1_i1	c10orf118 partial	428	20	7.13809e-20	0.691
37302	c30935_g1_i1	c12orf41 homolog	266	3	5.45642e-07	0.6333
8130	c34786_g1_i1	c-1-tetrahydrofolate cytoplasmic	1190	20	4.20835e-139	0.8405
13487	c6608_g1_i1	c-1-tetrahydrofolate cytoplasmic	1625	20	0	0.84
16402	c9557_g1_i1	c-1-tetrahydrofolate cytoplasmic-like	327	20	9.26934e-39	0.7615
36531	c30146_g1_i1	c20orf4 homolog	286	20	3.43177e-22	0.688
32612	c26140_g1_i1	c3orf19 homolog	284	16	7.58045e-12	0.6469
18735	c11964_g1_i1	ca	406	20	4.72811e-24	0.8445
23338	c16641_g1_i1	ca	248	20	1.84107e-35	0.919
27174	c20578_g1_i1	ca2+-modulated nonselective cation channel polycystin	646	7	1.7646e-15	0.4729
22464	c15741_g1_i1	ca-activated cl channel protein	348	11	5.11263e-07	0.4482
27612	c21025_g1_i1	caax prenyl partial	205	20	7.04694e-25	0.7315
11834	c38588_g1_i1	caax prenyl protease 1 homolog	225	20	1.56436e-10	0.6935
16069	c9220_g1_i1	caax prenyl protease 1 homolog	331	20	1.37242e-39	0.8095
8342	c34999_g1_i1	cactin cg1676-pa	230	20	1.87528e-14	0.8275
14359	c7487_g1_i1	cactin cg1676-pa	421	20	2.67212e-79	0.8865
5000	c5383_g1_i1	cactus protein	3981	20	1.53152e-160	0.616
5001	c5383_g1_i2	cactus protein	3958	20	1.30088e-160	0.616
25553	c18913_g1_i1	cad protein	1369	20	4.70776e-140	0.651
26979	c20376_g1_i1	cadherin 6	207	14	2.97448e-07	0.7586
17780	c10977_g1_i1	cadherin 88c	549	20	2.31305e-56	0.753
20339	c13578_g1_i1	cadherin 88c	222	20	3.86746e-21	0.748
22564	c15846_g1_i1	cadherin 88c	367	20	5.75876e-17	0.8035
35634	c29235_g1_i1	cadherin 88c	259	20	2.18188e-18	0.7085
21008	c14259_g1_i1	cadherin egf lag seven-pass g-type receptor 1	333	20	1.01102e-22	0.598
17957	c11161_g1_i1	cadherin- isoform a	245	20	3.02953e-45	0.908
18303	c11514_g1_i1	cadherin- isoform a	204	20	4.55029e-33	0.647
24628	c17976_g1_i1	cadherin- isoform b	369	20	1.22305e-70	0.874
36069	c29678_g1_i1	cadherin- isoform c	359	20	1.34182e-68	0.9515
33342	c26888_g1_i1	cadherin- isoform d	280	20	1.41478e-54	0.701
34885	c28477_g1_i1	cadherin- isoform d	548	20	2.78764e-100	0.776
30640	c24134_g1_i1	cadherin- isoform f	241	20	6.40047e-41	0.817
30375	c23868_g1_i1	cadherin- isoform g	476	20	3.57458e-93	0.923
26724	c20112_g1_i1	cadherin- isoform h	811	20	1.18728e-174	0.843
17758	c10955_g1_i1	cadherin- isoform i	406	20	6.28545e-86	0.8645
20837	c14085_g1_i1	cadherin- isoform i	488	20	1.15908e-98	0.936
27394	c20803_g1_i1	cadherin- isoform i	311	20	2.6964e-59	0.915
15476	c8618_g1_i1	cadherin-23-like isoform 1	384	20	2.7273e-30	0.658
35840	c29445_g1_i1	calcineurin subunit b type 2-like	1852	20	1.01475e-105	0.9805
9245	c35921_g1_i1	calcineurin-binding protein cabin-1	348	20	1.78022e-19	0.615
19144	c12371_g1_i1	calcipressin-1	307	20	2.10529e-24	0.6545
27715	c21130_g1_i1	calcipressin-2 isoform x2	332	20	1.16982e-20	0.6805
4594	c5039_g1_i1	calcium and integrin-binding protein 1	616	20	6.28586e-75	0.8145
4595	c5039_g1_i2	calcium and integrin-binding protein 1	723	20	1.99728e-85	0.7245
4596	c5039_g1_i3	calcium and integrin-binding protein 1	651	20	3.77744e-93	0.83
4597	c5039_g1_i4	calcium and integrin-binding protein 1	646	20	3.50233e-93	0.83
19816	c13048_g1_i1	calcium binding egf domain containing protein	204	20	4.46683e-18	0.6155
19917	c13152_g1_i1	calcium calmodulin-dependent protein kinase type ii alpha chain-like isoform 3	836	20	3.21765e-163	0.9305
9294	c35971_g1_i1	calcium channel flower-like isoform 1	297	20	4.04594e-31	0.7175
20188	c13425_g1_i1	calcium homeostasis endoplasmic reticulum protein	840	20	1.41684e-32	0.8935
29398	c22883_g1_i1	calcium homeostasis endoplasmic reticulum protein	1166	20	2.40763e-25	0.745
19413	c12642_g1_i1	calcium release-activated calcium channel protein 1-like	1076	20	3.81929e-30	0.658
24347	c17690_g1_i1	calcium uptake protein 1 mitochondrial-like	1280	20	0	0.8775
30099	c23590_g1_i1	calcium-activated chloride channel regulator 4	638	20	4.16349e-23	0.464
31961	c25473_g1_i1	calcium-activated potassium channel	267	9	5.17957e-26	0.7978
9249	c35925_g1_i1	calcium-activated potassium channel alpha chain	300	20	3.17923e-28	0.963
22949	c16240_g1_i1	calcium-activated potassium channel alpha chain	314	20	6.07031e-54	0.957
8944	c35614_g1_i1	calcium-binding mitochondrial carrier protein aralar1	489	20	4.57257e-85	0.855
17034	c10205_g1_i1	calcium-binding mitochondrial carrier protein aralar1	263	20	1.18941e-39	0.833
18028	c11233_g1_i1	calcium-binding mitochondrial carrier protein aralar1	279	20	1.51654e-51	0.933
15699	c8845_g1_i1	calcium-binding mitochondrial carrier protein aralar1-like	211	20	8.23013e-32	0.88
18101	c11309_g1_i1	calcium-binding mitochondrial carrier protein aralar1-like	233	20	5.24764e-24	0.7655
21996	c15269_g1_i1	calcium-binding mitochondrial carrier protein s -2-like	274	20	9.67449e-26	0.683
2232	c2408_g1_i1	calcium-binding mitochondrial carrier protein s -2-like isoform x1	761	20	4.49595e-18	0.8455
18717	c11946_g1_i1	calcium-binding protein p22-like	599	20	1.4588e-82	0.877
29808	c23297_g1_i1	calcium-independent phospholipase a2 isoform a	304	20	6.50575e-18	0.8345
1877	c2001_g1_i1	calcium-independent phospholipase a2-gamma	542	20	1.86822e-17	0.5945
2810	c3023_g1_i1	calcium-independent phospholipase a2-gamma-like	881	20	3.22957e-103	0.7125
2811	c3023_g1_i2	calcium-independent phospholipase a2-gamma-like	834	20	3.04388e-86	0.7115
37629	c31269_g1_i1	calcium-independent protein kinase c-like	372	20	3.61604e-31	0.6435
33014	c26550_g1_i1	calcium-transporting atpase sarcoplasmic endoplasmic reticulum type	283	20	4.22986e-43	0.784
32529	c26055_g1_i1	calcium-transporting atpase sarcoplasmic endoplasmic reticulum type (calcium pump)	290	20	2.4199e-54	0.9505
5079	c5470_g1_i1	calcium-transporting atpase sarcoplasmic endoplasmic reticulum type-like	5503	20	0	0.915
5080	c5470_g1_i2	calcium-transporting atpase sarcoplasmic endoplasmic reticulum type-like	6000	20	0	0.915
5081	c5470_g1_i3	calcium-transporting atpase sarcoplasmic endoplasmic reticulum type-like	4676	20	0	0.915
13748	c6870_g1_i1	calcium-transporting atpase type 2c member 1 isoform 1	299	20	6.23981e-28	0.756
20206	c13443_g1_i1	calcium-transporting atpase type 2c member 1-like	476	20	1.368e-38	0.628
21104	c14357_g1_i1	calcium-transporting atpase type 2c member 2	456	20	1.93541e-60	0.847
34475	c28066_g1_i1	calcyphosin-like protein	761	20	1.09364e-106	0.713
2198	c2366_g1_i1	calmodulin	3436	20	1.40355e-91	0.979
15229	c8369_g1_i1	calmodulin-like isoform 1	552	20	9.09467e-39	0.8235
32422	c25945_g1_i1	calmodulin-like protein 4-like	203	20	1.18664e-26	0.7995
19656	c12886_g1_i1	calnexin	1134	20	4.5184e-163	0.7865
24857	c18206_g1_i1	calnexin	738	2	6.46389e-24	0.78
7688	c34337_g1_i1	calnexin isoform b	316	20	6.70868e-54	0.829
13862	c6984_g1_i1	calpain 5	402	20	1.5946e-82	0.727
18410	c11622_g1_i1	calpain 5	217	20	1.06302e-38	0.8055
34634	c28225_g1_i1	calpain-5	1081	20	2.17384e-179	0.629
34618	c28208_g1_i1	calpain-5-like isoform x4	314	20	2.59172e-52	0.735
21457	c14715_g1_i1	calpain-7-like	237	20	8.72777e-31	0.811
15100	c8238_g1_i1	calpain-a-like isoform 1	1350	20	0	0.8025
624	c686_g1_i1	calpain-a-like isoform 3	1978	20	0	0.8325
4815	c5211_g1_i1	calponin transgelin	2068	20	1.37496e-83	0.822
36049	c29658_g1_i1	calponin transgelin	922	20	1.76112e-94	0.822
6154	c32772_g1_i1	calponin y domain protein	249	7	3.59765e-13	0.6029
23140	c16435_g1_i1	calponin y domain protein	373	5	8.42121e-10	0.706
4586	c5031_g1_i3	calponin-3	1491	20	1.62231e-102	0.6565
4585	c5031_g1_i2	calponin-3 isoform 1	1584	20	4.60436e-102	0.6665
24240	c17584_g1_i1	calreticulin	1686	20	0	0.8855
36201	c29813_g1_i1	calsenilin-like isoform x2	202	20	1.08723e-21	0.766
10755	c37470_g1_i1	calsyntenin-1 precursor	310	20	6.84374e-46	0.8145
31940	c25452_g1_i1	calsyntenin-1 precursor	732	20	1.93157e-118	0.764
36795	c30410_g1_i1	calsyntenin-1-like	1086	20	4.34461e-69	0.5505
36000	c29607_g1_i1	calsyntenin-1-like isoform 1	242	20	3.07195e-29	0.7535
4201	c4622_g1_i1	calumenin precursor	2112	20	9.05205e-140	0.769
4202	c4622_g1_i2	calumenin precursor	2104	20	8.28606e-140	0.769
23396	c16701_g1_i1	camp and camp-inhibited cgmp 3 -cyclic phosphodiesterase 10a	209	20	3.24007e-22	0.76
32358	c25880_g1_i1	camp and camp-inhibited cgmp 3 -cyclic phosphodiesterase 10a	277	20	1.73745e-16	0.7155
29171	c22651_g1_i1	camp response element-binding protein	551	20	3.64291e-15	0.6795
3361	c3664_g1_i1	camp-dependent protein kinase catalytic	553	20	2.65573e-31	0.7345
8650	c35312_g1_i1	camp-dependent protein kinase catalytic	399	20	4.76793e-80	0.9245
15755	c8902_g1_i1	camp-dependent protein kinase catalytic	203	20	4.75011e-28	0.8745
35854	c29460_g1_i1	camp-dependent protein kinase catalytic	916	20	9.07024e-170	0.8495
3917	c4302_g1_i1	camp-dependent protein kinase catalytic subunit	2597	20	0	0.9655
19298	c12526_g1_i1	camp-dependent protein kinase r2	1165	20	1.6526e-143	0.76
18980	c12206_g1_i1	camp-dependent protein kinase type i regulatory subunit-like	1813	20	0	0.8595
11964	c6119_g1_i1	camp-regulated phosphoprotein 19	1088	20	8.34616e-30	0.7115
18697	c11925_g1_i1	camp-response element binding	3674	20	4.14646e-34	0.6595
4444	c4909_g1_i1	camp-responsive element-binding 2-like	1319	20	1.09707e-22	0.902
4445	c4909_g1_i2	camp-responsive element-binding 2-like	1255	20	6.88986e-23	0.9035
4446	c4909_g1_i3	camp-responsive element-binding 2-like	1254	20	1.09311e-22	0.9035
13229	c6462_g1_i1	camp-specific 3 -cyclic phosphodiesterase	8865	20	0	0.7945
13231	c6462_g1_i2	camp-specific 3 -cyclic phosphodiesterase	4195	20	0	0.8
19479	c12708_g1_i1	canalicular multispecific organic anion transporter 1-like	333	20	3.94764e-41	0.743
28423	c21858_g1_i1	canalicular multispecific organic anion transporter 2	221	20	1.51975e-23	0.78
1927	c2047_g1_i1	cancer-related nucleoside-triphosphatase	931	20	1.04191e-62	0.7345
21995	c15268_g1_i1	canoe cg2534-pa	766	20	1.7301e-73	0.6195
29843	c23332_g1_i1	canoe cg2534-pa	904	20	1.41244e-26	0.6215
21862	c15131_g1_i1	cap-gly domain-containing linker protein 1	734	20	1.12587e-32	0.6535
16097	c9250_g1_i1	capicua protein	455	4	9.067e-09	0.4975
22885	c16175_g1_i1	capicua protein	290	20	6.74936e-12	0.5325
7920	c34572_g1_i1	capsid protein precursor	727	8	2.77435e-11	0.5013
547	c580_g1_i1	cap-specific mrna (nucleoside-2 -o-)-methyltransferase 1	358	20	2.10282e-16	0.6105
7785	c34436_g1_i1	cap-specific mrna (nucleoside-2 -o-)-methyltransferase 1	708	20	1.54926e-25	0.6515
9221	c35897_g1_i1	cap-specific mrna (nucleoside-2 -o-)-methyltransferase 1	896	20	3.19317e-65	0.626
38481	c32142_g1_i1	cap-specific mrna (nucleoside-2 -o-)-methyltransferase 1	271	20	1.21382e-32	0.736
26811	c20203_g1_i1	carbamoyl-phosphate synthase	227	20	2.943e-20	0.7545
1746	c1882_g1_i1	carbamoyl-phosphate synthase large	1757	20	3.03524e-93	0.866
32456	c25980_g1_i1	carbohydrate sulfotransferase 11-like	324	20	6.3315e-37	0.6735
23073	c16366_g1_i1	carbohydrate sulfotransferase 14-like	443	20	1.12341e-28	0.5875
24772	c18122_g1_i1	carbon catabolite repressor protein	439	20	2.046e-16	0.545
20200	c13437_g1_i1	carbonic anhydrase 2-like	1333	20	2.61087e-134	0.736
1322	c1413_g1_i1	carbonyl reductase	466	20	2.38368e-54	0.7675
1323	c1413_g1_i2	carbonyl reductase	487	20	5.16929e-54	0.7675
4037	c4407_g1_i1	carbonyl reductase	491	20	1.19589e-35	0.785
4038	c4407_g1_i2	carbonyl reductase	835	20	3.47923e-34	0.785
4799	c5196_g1_i1	carbonyl reductase	1028	20	3.26035e-66	0.695
4800	c5196_g2_i1	carbonyl reductase	680	20	1.95254e-72	0.6805
3505	c3846_g1_i1	carboxyl cholinesterase 5bs	895	20	1.67416e-37	0.496
30565	c24060_g1_i1	carboxylesterase 3 isoform x2	330	2	9.00209e-06	0.54
5145	c5532_g1_i1	carboxylesterase 6	298	20	2.91253e-22	0.6425
30683	c24178_g1_i1	carboxyl-terminal pdz ligand of neuronal nitric oxide synthase protein	229	20	5.74265e-38	0.929
22533	c15812_g1_i1	carboxypeptidase d	301	20	3.07728e-08	0.519
34499	c28090_g1_i1	carboxy-terminal domain rna polymerase ii polypeptide a small phosphatase 1-like	1746	20	1.156e-123	0.7905
7152	c33802_g1_i1	carcinin-like protein	572	20	1.12131e-34	0.572
12914	c6425_g2_i1	carnitine o-acetyltransferase	2294	20	0	0.664
6873	c33521_g1_i1	carnitine o-palmitoyltransferase liver isoform-like isoform 1	1060	20	4.26321e-172	0.772
29496	c22984_g1_i1	carnitine o-palmitoyltransferase liver isoform-like isoform 1	387	20	6.43546e-18	0.7445
9924	c36614_g1_i1	carnitine o-palmitoyltransferase liver isoform-like isoform x2	245	20	3.6449e-24	0.729
26000	c19367_g1_i1	carnitine o-palmitoyltransferase mitochondrial	545	20	1.45299e-47	0.7355
35315	c28912_g1_i1	carnitine o-palmitoyltransferase mitochondrial	1218	20	6.66431e-129	0.6945
22526	c15805_g1_i1	carnitine palmitoyltransferase	412	20	1.64656e-65	0.8565
7199	c33849_g1_i1	carnitine palmitoyltransferase family member cpt-2	487	20	3.48169e-63	0.7175
38784	c32457_g1_i1	carotenoid ester lipase precursor	308	17	3.12891e-12	0.5353
24530	c17876_g1_i1	cartilage oligomeric matrix protein	251	20	1.78677e-30	0.748
20605	c13849_g1_i1	cartilage oligomeric matrix protein partial	736	5	1.11366e-12	0.476
9868	c36558_g1_i1	cas1 domain-containing protein 1-like	244	20	5.69828e-25	0.745
16046	c9197_g1_i1	casein kinase	556	20	3.283e-108	0.9025
7410	c34057_g1_i1	casein kinase i isoform alpha isoform x3	1604	20	0	0.9505
24432	c17776_g1_i1	casein kinase ii subunit alpha	2570	20	0	0.9255
34842	c28433_g1_i1	casein kinase ii subunit beta	1215	20	4.57232e-139	0.9395
25950	c19315_g1_i1	caseinolytic peptidase b protein homolog	937	20	7.9324e-171	0.871
998	c1067_g1_i1	caskin-2- partial	2354	20	8.70528e-14	0.5385
24290	c17634_g1_i1	caskin-2-like isoform x1	732	10	4.46427e-11	0.718
10519	c37223_g1_i1	caskin-2-like isoform x4	525	19	5.77242e-11	0.5232
38048	c31697_g1_i1	caspase nc-like	338	20	2.12333e-11	0.5625
26010	c19377_g1_i1	casp-like transcription factor	505	20	7.91634e-21	0.5365
11354	c38088_g1_i1	cat eye syndrome critical region protein 2	466	20	1.79061e-34	0.7125
20354	c13593_g1_i1	cat eye syndrome critical region protein 2	318	20	2.35653e-24	0.8995
21401	c14658_g1_i1	cat eye syndrome critical region protein 2	483	20	1.81092e-19	0.7405
300	c303_g1_i2	cat eye syndrome critical region protein 5 homolog	287	20	2.06937e-14	0.7745
6790	c33439_g1_i1	cat eye syndrome critical region protein 5 homolog	336	20	1.18498e-31	0.626
299	c303_g1_i1	cat eye syndrome critical region protein 5-like	318	20	1.19627e-38	0.757
13893	c7014_g1_i1	catalase	2688	20	0	0.8495
6755	c33404_g1_i1	catenin alpha-like	1266	20	0	0.8845
17393	c10574_g1_i1	catenin alpha-like	267	20	6.93295e-40	0.9035
31923	c25435_g1_i1	catenin alpha-like	349	20	7.14405e-09	0.81
32361	c25883_g1_i1	catenin alpha-like	422	20	6.80641e-72	0.8795
3759	c4151_g1_i1	catenin delta-2-like	1090	20	1.87186e-48	0.805
3760	c4151_g1_i2	catenin delta-2-like	1114	20	8.33536e-49	0.8005
3761	c4151_g1_i3	catenin delta-2-like	1068	20	1.37501e-57	0.7235
13381	c6501_g1_i1	catenin delta-2-like	1307	20	1.28267e-137	0.744
20542	c13784_g1_i1	catenin delta-2-like	293	20	3.69765e-45	0.9575
4346	c4803_g1_i1	cathepsin b	2233	20	0	0.8115
35605	c29207_g1_i1	cathepsin c	410	20	2.83107e-68	0.675
19574	c12803_g1_i1	cathepsin d	2526	20	0	0.833
4825	c5220_g1_i1	cathepsin f	2589	20	9.99351e-143	0.7375
18599	c11826_g1_i1	cathepsin l	1782	20	0	0.8145
23529	c16839_g1_i1	cathepsin l	222	20	2.04761e-26	0.816
25858	c19222_g1_i1	cathepsin l	231	20	6.31924e-31	0.767
6463	c33094_g1_i1	cathepsin l-like	241	20	1.02944e-34	0.8045
10958	c37680_g1_i1	cathepsin l-like	216	20	4.34857e-25	0.847
11000	c37723_g1_i1	cation chloride cotransporter	279	20	4.69256e-46	0.8555
7735	c34385_g1_i1	cation transport regulator-like protein 2	707	20	2.30998e-72	0.7115
35067	c28660_g1_i1	cationic amino acid transporter	254	20	2.65691e-28	0.7715
18349	c11561_g1_i1	cation-independent mannose-6-phosphate partial	237	1	3.88945e-15	0.67
21988	c15261_g1_i1	cation-independent mannose-6-phosphate receptor	354	20	1.06016e-11	0.507
9936	c36626_g1_i1	cation-transporting atpase	290	20	7.70264e-33	0.76
16239	c9393_g1_i1	cation-transporting atpase	259	20	7.73579e-26	0.6525
27622	c21035_g1_i1	cation-transporting atpase	276	20	2.17963e-15	0.72
36630	c30244_g1_i1	cation-transporting atpase	313	20	9.16009e-48	0.87
12383	c6293_g1_i1	cb1 cannabinoid receptor-interacting protein 1	4027	20	7.82146e-32	0.5485
21562	c14823_g1_i1	cca trna nucleotidyltransferase mitochondrial-like	229	20	1.12216e-16	0.6755
35609	c29211_g1_i1	ccaat enhancer-binding protein	919	20	2.46715e-43	0.5525
21340	c14595_g1_i1	ccaat enhancer-binding protein zeta	573	20	2.37287e-24	0.5005
22199	c15472_g1_i1	ccaat enhancer-binding protein zeta	554	20	1.09661e-31	0.562
51	c54_g1_i1	cchc-type zinc finger protein cg3800-like	1629	20	2.46003e-59	0.658
52	c54_g1_i2	cchc-type zinc finger protein cg3800-like	1660	20	1.00966e-47	0.661
22251	c15524_g1_i1	ccr4-not transcription	304	20	3.77446e-31	0.7625
26908	c20305_g1_i1	ccr4-not transcription	305	20	9.37787e-41	0.8145
37149	c30774_g1_i1	ccr4-not transcription	201	20	1.92481e-14	0.916
8462	c35119_g1_i1	ccr4-not transcription complex	1784	20	7.31697e-21	0.6415
17822	c11020_g1_i1	ccr4-not transcription complex subunit 1	385	20	7.07835e-30	0.661
18741	c11970_g1_i1	ccr4-not transcription complex subunit 1	327	20	5.02253e-46	0.862
22683	c15970_g1_i1	ccr4-not transcription complex subunit 1	249	20	1.36612e-20	0.7365
29791	c23280_g1_i1	ccr4-not transcription complex subunit 1	714	20	8.13173e-103	0.841
32205	c25723_g1_i1	ccr4-not transcription complex subunit 1	521	20	3.74808e-70	0.7535
13779	c6901_g1_i1	ccr4-not transcription complex subunit 1 isoform 1	899	20	1.06215e-88	0.8555
17091	c10263_g1_i1	ccr4-not transcription complex subunit 1 isoform x2	236	20	6.00381e-11	0.657
29074	c22544_g1_i1	ccr4-not transcription complex subunit 10 isoform x1	299	20	9.11467e-20	0.649
35216	c28810_g1_i1	ccr4-not transcription complex subunit 11	574	20	1.30269e-35	0.5945
14955	c8092_g1_i1	ccr4-not transcription complex subunit 1-like isoform x2	574	20	2.73587e-22	0.5645
16796	c9957_g1_i1	ccr4-not transcription complex subunit 2	374	20	4.84871e-24	0.6575
24989	c18342_g1_i1	ccr4-not transcription complex subunit 2	758	20	7.95036e-85	0.683
21219	c14473_g1_i1	ccr4-not transcription complex subunit 2-like	404	20	1.6537e-24	0.84
19302	c12530_g1_i1	ccr4-not transcription complex subunit 3	1457	20	5.62211e-110	0.894
25299	c18657_g1_i1	ccr4-not transcription complex subunit 3	540	20	1.85361e-71	0.8795
23611	c16925_g1_i1	ccr4-not transcription complex subunit 4	302	20	8.69222e-49	0.8855
19970	c13205_g1_i1	ccr4-not transcription complex subunit 4 isoform 3	412	20	5.12447e-78	0.93
37988	c31637_g1_i1	ccr4-not transcription complex subunit 6 isoform x2	337	20	8.57778e-30	0.79
18271	c11482_g1_i1	ccr4-not transcription complex subunit 6-like	223	20	4.14285e-43	0.9575
30082	c23573_g1_i1	cd151 antigen	305	20	7.5586e-19	0.615
966	c1036_g1_i1	cd2 antigen cytoplasmic tail-binding protein 2	1358	20	1.06455e-68	0.606
3500	c3841_g1_i1	cd63 antigen	1947	20	3.27732e-81	0.5705
30381	c23874_g1_i1	cd63 antigen	1000	20	4.65027e-103	0.4675
34703	c28294_g1_i1	cd63 antigen	1663	20	2.23052e-59	0.624
13491	c6612_g1_i1	cd9 antigen-like	1878	20	9.36487e-55	0.5745
37023	c30645_g1_i1	cdc2-related kinase	493	20	1.93441e-40	0.856
24897	c18247_g1_i1	cdc37	1471	20	2.31972e-131	0.781
3868	c4258_g1_i1	cdc42 homolog	2047	20	5.17028e-125	0.971
29435	c22922_g1_i1	cdc42 small effector protein homolog	901	20	5.327e-19	0.7225
30824	c24321_g1_i1	cdc73 domain protein	1001	20	4.87673e-148	0.7445
24727	c18076_g1_i1	cdgsh iron sulfur domain-containing protein 1	644	20	1.70557e-28	0.651
5175	c5563_g1_i1	cdgsh iron-sulfur domain-containing protein mitochondrial	754	20	4.17509e-23	0.6365
5176	c5563_g1_i2	cdgsh iron-sulfur domain-containing protein mitochondrial	564	20	7.35623e-24	0.643
5177	c5563_g1_i3	cdgsh iron-sulfur domain-containing protein mitochondrial	591	20	8.89271e-24	0.6435
5178	c5563_g1_i4	cdgsh iron-sulfur domain-containing protein mitochondrial	705	20	2.59164e-23	0.6375
5179	c5563_g1_i5	cdgsh iron-sulfur domain-containing protein mitochondrial	895	20	7.27695e-23	0.637
2417	c2597_g1_i1	cdgsh iron-sulfur domain-containing protein mitochondrial-like	1200	20	4.0344e-32	0.73
2418	c2597_g1_i2	cdgsh iron-sulfur domain-containing protein mitochondrial-like	1020	20	2.10794e-15	0.7295
34870	c28461_g1_i1	cdk2-associated and cullin domain-containing protein 1	1120	20	9.13704e-52	0.5935
34319	c27904_g1_i1	cdk5 regulatory subunit-associated protein 1	371	20	2.22523e-46	0.7965
35368	c28965_g1_i1	cdk5 regulatory subunit-associated protein 1-like	415	20	6.02465e-60	0.7945
16502	c9659_g1_i1	cdk5 regulatory subunit-associated protein 3 isoform x2	1184	20	6.18864e-60	0.5465
16542	c9700_g1_i1	cdk5 regulatory subunit-associated protein 3-like	399	20	3.83333e-52	0.776
27763	c21179_g1_i1	cdna sequence isoform cra_b	418	20	3.05766e-13	0.5495
13429	c6549_g1_i1	cdp-diacylglycerol--glycerol-3-phosphate 3- mitochondrial-like	282	20	8.84662e-32	0.7435
31540	c25045_g1_i1	cdp-diacylglycerol--glycerol-3-phosphate 3- mitochondrial-like	492	20	1.55427e-13	0.589
36959	c30578_g1_i1	cdp-diacylglycerol--inositol 3-phosphatidyltransferase-like	415	20	2.60989e-55	0.8455
28873	c22334_g1_i1	cdw92 antigen	229	20	4.55713e-13	0.5795
32870	c26402_g1_i1	cell adhesion	492	20	2.61288e-10	0.476
7704	c34353_g1_i1	cell adhesion molecule	920	20	8.89236e-34	0.7505
34548	c28139_g1_i1	cell adhesion molecule	2068	20	0	0.725
34647	c28238_g1_i1	cell adhesion molecule	731	20	2.93937e-93	0.7205
38699	c32366_g1_i1	cell adhesion molecule 3- partial	233	20	1.28165e-13	0.6105
7657	c34306_g1_i1	cell cycle checkpoint protein rad1-like	666	20	1.31607e-48	0.7345
17040	c10211_g1_i1	cell cycle control protein 50a-like	252	20	2.28335e-17	0.798
25845	c19208_g1_i1	cell cycle control protein 50a-like	294	20	3.06932e-28	0.6375
8355	c35012_g1_i1	cell cycle control protein 50a-like isoform x2	335	20	6.68644e-40	0.7545
7596	c34245_g1_i1	cell cycle regulator mat89bb homolog	428	20	1.52842e-51	0.8235
14687	c7820_g1_i1	cell cycle regulator mat89bb homolog	318	20	3.79354e-21	0.774
31438	c24942_g1_i1	cell cycle regulator mat89bb homolog	325	20	2.15559e-29	0.6625
26776	c20166_g1_i1	cell death activator cide-b	261	20	4.80116e-15	0.6605
25106	c18461_g1_i1	cell death-regulatory protein grim19	744	20	1.21549e-44	0.6975
24212	c17556_g1_i1	cell division control protein	454	10	1.04747e-07	0.512
35848	c29453_g1_i1	cell division cycle 2-like protein kinase 5	937	20	3.14051e-67	0.7
22114	c15386_g1_i1	cell division cycle 5-like	247	20	4.45872e-13	0.7485
24926	c18276_g1_i1	cell division cycle 5-like	375	20	4.8398e-36	0.8055
20623	c13867_g1_i1	cell division cycle 5-like protein	336	20	4.84745e-31	0.6995
24521	c17867_g1_i1	cell division cycle 5-like protein	326	20	4.20094e-24	0.722
30890	c24388_g1_i1	cell division cycle 5-like protein	442	20	7.38565e-64	0.925
14409	c7539_g1_i1	cell division cycle and apoptosis regulator protein 1	212	20	5.54277e-21	0.841
30509	c24001_g1_i1	cell division cycle and apoptosis regulator protein 1	352	20	2.29378e-27	0.8375
34371	c27959_g1_i1	cell division cycle and apoptosis regulator protein 1-like	213	20	2.98894e-12	0.862
104	c95_g1_i1	cell division cycle protein 123 homolog	1632	20	1.33516e-87	0.5655
22821	c16106_g1_i1	cell division cycle protein 16 homolog	255	20	1.33248e-38	0.8625
36180	c29792_g1_i1	cell division cycle protein 16 homolog	421	20	3.47779e-28	0.5515
2617	c2794_g1_i1	cell division cycle protein 20 homolog	1369	20	6.32245e-179	0.718
2618	c2794_g1_i2	cell division cycle protein 20 homolog	1290	20	2.20476e-179	0.7175
19966	c13201_g1_i1	cell division cycle protein 23 homolog	254	20	6.55323e-27	0.782
9948	c36638_g1_i1	cell division cycle protein 27 homolog	259	20	2.30247e-15	0.97
24670	c18018_g1_i1	cell division cycle protein 27 homolog	848	20	9.95e-139	0.8025
28052	c21478_g1_i1	cell division protein	259	20	2.86085e-14	0.564
8592	c35253_g1_i1	cell division protein kinase 10	318	20	1.21722e-51	0.8455
11067	c37793_g1_i1	cell division protein kinase 9	281	20	2.59627e-19	0.725
17682	c10876_g1_i1	cell growth regulator with ring finger	288	1	1.09257e-06	0.51
11937	c38702_g1_i1	cell growth regulator with ring finger domain protein 1-like	203	16	4.43301e-09	0.6613
25603	c18964_g1_i1	cell growth regulator with ring finger domain protein 1-like	332	20	9.06586e-13	0.6775
13811	c6933_g1_i1	cell growth-regulating nucleolar protein	1197	20	2.41452e-57	0.5515
25808	c19171_g1_i1	centaurin beta	345	8	1.98327e-08	0.64
34942	c28534_g1_i1	centaurin-beta 2	496	12	2.743e-09	0.6433
19220	c12448_g1_i1	centaurin-gamma 1a	453	20	6.71656e-68	0.8095
26585	c19968_g1_i1	centaurin-gamma 1a	414	20	2.03793e-28	0.526
30851	c24349_g1_i1	centaurin-gamma 1a	415	20	2.14506e-29	0.7555
34176	c27755_g1_i1	centaurin-gamma 1a	206	18	1.78365e-10	0.5906
32113	c25628_g1_i1	centrin	271	20	7.37137e-40	0.879
10756	c37471_g1_i1	centromere kinetochore protein zw10 homolog	278	20	4.67908e-24	0.643
21786	c15050_g1_i1	centromere protein j-like	484	20	5.38504e-51	0.672
35329	c28926_g1_i1	centrosomal protein of 120 kda isoform x1	910	20	6.08542e-13	0.5385
653	c720_g1_i1	centrosomal protein of 19 kda	512	20	3.7395e-32	0.6255
654	c720_g1_i2	centrosomal protein of 19 kda	526	20	3.13171e-20	0.6485
35774	c29377_g1_i1	centrosomal protein of 290 kda	220	20	2.82235e-10	0.657
23545	c16856_g1_i1	centrosomal protein of 76 kda-like	202	1	3.13895e-07	0.58
24982	c18335_g1_i1	centrosome-associated zinc finger protein cp190	603	17	1.57741e-13	0.5494
12650	c6374_g1_i1	centrosomin-like protein	7845	20	1.54143e-19	0.633
12651	c6374_g1_i2	centrosomin-like protein	7123	20	1.36853e-19	0.633
12652	c6374_g1_i3	centrosomin-like protein	7861	20	1.54502e-19	0.633
3371	c3683_g1_i1	cg10174 protein	2389	20	1.51958e-50	0.798
30592	c24087_g1_i1	cg10225 cg10225-pa	1854	20	2.28073e-45	0.605
33114	c26654_g1_i1	cg10527-like methyltransferase	377	20	6.28742e-27	0.6105
8469	c35126_g1_i1	cg11044 cg11044-pa	232	20	2.06039e-21	0.6675
14108	c7233_g1_i1	cg11044 cg11044-pa	428	20	9.79909e-34	0.656
16191	c9345_g1_i1	cg11071-pa	434	20	1.51163e-22	0.6855
22272	c15547_g1_i1	cg1136 cg1136-pa	338	20	4.53101e-25	0.73
22963	c16254_g1_i1	cg12164 cg12164-pa	270	16	1.35804e-08	0.6106
15005	c8143_g1_i1	cg12283	239	20	7.49349e-15	0.647
17586	c10774_g1_i1	cg12948 cg12948-pa	351	4	3.16788e-06	0.665
34879	c28471_g1_i1	cg13185 cg13185-pb	2216	20	1.32687e-60	0.567
19681	c12910_g1_i1	cg13532 cg13532-pa	1203	20	9.57226e-42	0.5325
35959	c29565_g1_i1	cg13532 cg13532-pa	211	20	1.0146e-18	0.678
31635	c25140_g1_i1	cg1554	260	20	9.33719e-42	0.891
24109	c17452_g1_i1	cg16926 cg16926-pa	270	11	8.54261e-08	0.5136
7642	c34291_g1_i1	cg17119 cg17119-pa	507	8	1.12927e-11	0.5225
20273	c13511_g1_i1	cg1785-like protein	1031	20	1.3306e-16	0.5245
13096	c6444_g4_i2	cg2206-pb-like protein	3069	20	2.56504e-153	0.591
29499	c22987_g1_i1	cg2206-pb-like protein	540	20	5.97097e-55	0.66
26085	c19452_g1_i1	cg2446	382	20	1.93279e-14	0.594
11545	c38283_g1_i1	cg2446 cg2446-pc	301	20	2.53013e-35	0.765
26616	c20001_g1_i1	cg31772 cg31772-pa	816	20	1.78015e-16	0.5445
24631	c17979_g1_i1	cg32418 cg32418-pa	857	4	9.15232e-08	0.5925
25806	c19169_g1_i1	cg32604	351	20	1.29848e-59	0.9105
19402	c12631_g1_i1	cg33332 cg33332-pa	293	9	5.66462e-08	0.7967
37826	c31468_g1_i1	cg33691 cg33691-pb	267	20	3.0209e-22	0.748
24046	c17388_g1_i1	cg33993 cg33993-pa	983	4	1.69519e-17	0.695
10502	c37206_g1_i1	cg3556 cg3556-pa	332	20	2.11037e-18	0.614
1316	c1407_g1_i1	cg3568	365	20	7.43404e-28	0.663
27784	c21201_g1_i1	cg3652	258	20	2.18001e-27	0.7455
3183	c3458_g1_i1	cg3655 cg3655-pb	1727	20	4.8471e-44	0.4815
9357	c36035_g1_i1	cg3683	820	20	1.45913e-65	0.7275
35647	c29248_g1_i1	cg3706 cg3706-pa	1774	20	1.68094e-123	0.572
24389	c17733_g1_i1	cg4236	1607	20	0	0.9755
8996	c35666_g1_i1	cg4553 cg4553-pa	376	20	1.01511e-15	0.5505
29635	c23124_g1_i1	cg4593-pa	1342	20	2.53102e-81	0.8325
18844	c12072_g1_i1	cg5080 cg5080-pb	2651	20	3.30259e-56	0.641
11978	c6126_g1_i3	cg6094	1214	20	1.42517e-44	0.6825
11976	c6126_g1_i1	cg6094-pa	638	20	3.05361e-46	0.6905
11977	c6126_g1_i2	cg6094-pa	1157	20	1.15118e-38	0.711
17097	c10269_g1_i1	cg6379	202	20	1.48909e-30	0.8515
26623	c20008_g1_i1	cg6498	570	20	3.48473e-125	0.9545
31295	c24797_g1_i1	cg6734 cg6734-pa	374	4	5.35964e-07	0.5825
4021	c4397_g1_i1	cg7029 cg7029-pc	6374	20	1.75742e-107	0.485
20705	c13949_g1_i1	cg7029 cg7029-pc	784	20	4.36727e-19	0.5305
21885	c15154_g1_i1	cg7840	388	20	6.37702e-16	0.57
2913	c3138_g1_i2	cg7840-pa	238	20	2.95164e-09	0.754
34209	c27788_g1_i1	cg8334	228	20	9.72933e-16	0.786
26607	c19992_g1_i1	cg8675 cg8675-pa	581	20	5.63754e-26	0.677
25045	c18399_g1_i1	cg8844	770	20	3.16736e-76	0.7885
31714	c25221_g1_i1	cg8929 cg8929-pc	319	20	1.13894e-09	0.7865
33715	c27275_g1_i1	cg9004 cg9004-pa	312	2	8.11667e-08	0.57
25406	c18764_g1_i1	cg9380 cg9380-pb	551	2	1.38653e-08	0.44
444	c465_g1_i1	cg9383-pa	1717	20	6.39744e-91	0.801
24527	c17873_g1_i1	cgmp-dependent 3 -cyclic phosphodiesterase	280	20	1.22507e-36	0.7705
4244	c4666_g1_i1	cgmp-dependent protein isozyme 2 forms cd4 t1 t3a t3b-like	1058	20	1.8865e-131	0.793
4245	c4666_g1_i2	cgmp-dependent protein isozyme 2 forms cd4 t1 t3a t3b-like	711	20	1.66235e-110	0.882
18672	c11900_g1_i1	cgmp-dependent protein kinase	1066	20	8.69284e-28	0.863
23280	c16579_g1_i1	cgmp-inhibited 3 -cyclic phosphodiesterase a	219	20	1.76824e-26	0.825
37212	c30842_g1_i1	cgmp-specific 3 -cyclic phosphodiesterase-like	229	20	1.6325e-38	0.9255
4855	c5246_g1_i1	chaoptin-like	5911	20	0	0.538
30066	c23557_g1_i1	chaoptin-like	639	20	1.49329e-44	0.5715
13741	c6863_g1_i1	chaperone activity of bc1 complex- mitochondrial-like	1186	20	2.27533e-105	0.8055
21136	c14390_g1_i1	chaperone activity of bc1 complex- mitochondrial-like	1059	20	2.46117e-102	0.759
36432	c30048_g1_i1	chaperone protein	288	20	4.42982e-17	0.7965
3379	c3693_g1_i1	chaperonin subunit 6a zeta	1796	20	0	0.849
31627	c25132_g1_i1	charged multivesicular body protein 1a	255	20	1.81941e-20	0.841
561	c602_g1_i1	charged multivesicular body protein 1b-like	1477	20	2.50637e-83	0.845
24934	c18285_g1_i1	charged multivesicular body protein 2b	461	20	7.59105e-27	0.7485
26204	c19579_g1_i1	charged multivesicular body protein 2b	278	20	1.16215e-26	0.739
26479	c19862_g1_i1	charged multivesicular body protein 3	513	20	1.37293e-16	0.7505
27209	c20613_g1_i1	charged multivesicular body protein 3	278	20	3.61853e-31	0.862
19197	c12424_g1_i1	charged multivesicular body protein 4b	1945	20	1.5717e-77	0.857
14545	c7676_g1_i1	charged multivesicular body protein 5	1671	20	3.66262e-82	0.868
36679	c30293_g1_i1	charged multivesicular body protein 6-like	242	20	1.82945e-14	0.8065
32672	c26203_g1_i1	charged multivesicular body protein 7-like	552	20	8.76265e-10	0.4925
16220	c9374_g1_i1	che-1	249	20	2.35398e-13	0.6805
3164	c3436_g1_i2	checkpoint kinase 1	2641	20	1.01363e-101	0.804
31678	c25185_g1_i1	checkpoint kinase 1	462	20	3.32967e-37	0.827
36747	c30362_g1_i1	checkpoint protein hus1-like	333	20	2.59505e-16	0.647
33056	c26592_g1_i1	chitin binding peritrophin-	228	5	7.95609e-09	0.632
10364	c37066_g1_i1	chitinase 1 precursor	246	14	1.3994e-18	0.69
23843	c17178_g1_i1	chitinase 1 precursor	217	20	1.20344e-32	0.766
24386	c17730_g1_i1	chitinase 1 precursor	334	20	6.84118e-23	0.7545
13924	c7045_g1_i1	chitinase 2	265	20	1.10994e-48	0.8795
14592	c7723_g1_i1	chitinase 2	346	20	2.32737e-63	0.8665
17196	c10370_g1_i1	chitinase 2	255	20	7.31119e-33	0.811
20925	c14175_g1_i1	chitinase 2	212	20	1.5927e-37	0.915
21393	c14649_g1_i1	chitinase 2	242	20	4.22584e-45	0.8745
20907	c14156_g1_i1	chitinase 3-like 2	330	20	2.02404e-30	0.708
28030	c21453_g1_i1	chitinase domain-containing protein 1	326	20	5.64206e-12	0.6005
28671	c22122_g1_i1	chitinase domain-containing protein 1	262	20	5.15303e-40	0.6785
15571	c8714_g1_i1	chitinase partial	322	20	5.39242e-29	0.8425
17566	c10754_g1_i1	chitinase partial	234	20	7.57688e-34	0.7425
21792	c15056_g1_i1	chitinase partial	234	20	6.70502e-30	0.705
10809	c37526_g1_i1	chitinase-related protein 1	330	1	5.24462e-06	0.52
18644	c11872_g1_i1	chitooligosaccharidolytic beta-n-acetylglucosaminidase-like	2350	20	0	0.6315
30062	c23553_g1_i1	chloride channel accessory 2-like	1083	20	1.01484e-47	0.5485
16928	c10097_g1_i1	chloride channel calcium activated 2-like	305	20	1.29066e-16	0.5195
25209	c18567_g1_i1	chloride channel clic-like protein 1-like	366	20	1.15843e-12	0.518
1234	c1302_g1_i1	chloride channel- isoform a	212	20	1.27323e-21	0.795
20528	c13770_g1_i1	chloride channel protein 2-like	1710	20	1.62169e-96	0.812
2127	c2281_g1_i1	chloride intracellular channel	2548	20	7.74274e-150	0.883
31243	c24742_g1_i1	chloride intracellular channel exl-1	332	20	2.29902e-29	0.6395
22182	c15455_g1_i1	chloride intracellular channel protein 2-like	305	20	1.13328e-27	0.6535
22336	c15611_g1_i1	choline ethanolamine kinase-like	209	20	2.65629e-13	0.6635
3675	c4064_g1_i1	choline ethanolaminephosphotransferase 1-like isoform 3	2619	20	3.59861e-151	0.742
3676	c4064_g1_i2	choline ethanolaminephosphotransferase 1-like isoform x2	1522	20	1.08819e-50	0.6845
15276	c8417_g1_i1	choline-phosphate cytidylyltransferase b	1979	20	2.53717e-153	0.79
28728	c22184_g1_i1	cholinephosphotransferase 1	205	1	4.70511e-06	0.72
15665	c8810_g1_i1	chondroitin 6-sulfotransferase 3-like	694	2	8.39556e-06	0.445
34388	c27977_g1_i1	chondroitin beta- -n-acetyl galactosaminyl transferase 1	406	20	2.61206e-27	0.9275
20191	c13428_g1_i1	chondroitin sulfate proteoglycan 4	210	15	2.40954e-11	0.6093
30706	c24202_g1_i1	chondroitin sulfate proteoglycan 4	210	20	3.74093e-19	0.646
32590	c26118_g1_i1	chondroitin sulfate proteoglycan 4	201	20	2.77407e-15	0.6715
33899	c27467_g1_i1	chondroitin sulfate synthase 2-like	266	2	4.12682e-07	0.66
2569	c2749_g1_i1	chorion peroxidase-like	541	20	6.00047e-70	0.587
7840	c34492_g1_i1	chorion peroxidase-like	514	20	1.8007e-98	0.7625
30697	c24193_g1_i1	chromatin accessibility complex protein 1	454	20	4.98717e-22	0.654
13613	c6734_g1_i1	chromatin complexes subunit bap18 isoform x3	351	20	1.53571e-24	0.7175
25029	c18383_g1_i1	chromatin modification-related protein meaf6	722	20	1.89257e-54	0.8455
35794	c29397_g1_i1	chromatin target of prmt1 protein isoform 1	1552	12	1.46811e-07	0.6433
17352	c10531_g1_i1	chromatin-remodeling complex atpase chain iswi-like	329	20	3.13957e-34	0.933
9605	c36291_g1_i1	chromobox protein 5	298	20	1.85893e-14	0.512
5141	c5528_g1_i1	chromobox protein homolog 1	1696	20	6.70784e-33	0.9115
8323	c34980_g1_i1	chromodomain helicase dna binding protein	341	20	1.05056e-67	0.9465
16212	c9366_g1_i1	chromodomain helicase dna binding protein	207	20	1.72301e-18	0.795
29395	c22880_g1_i1	chromodomain helicase-dna-binding	1996	20	3.12092e-138	0.5815
1513	c1626_g1_i1	chromodomain y-like protein 2	249	20	1.0889e-14	0.6435
1514	c1626_g1_i2	chromodomain y-like protein 2	324	20	1.50319e-08	0.6305
18341	c11553_g1_i1	chromodomain-helicase-dna-binding protein 1-like	242	20	1.46353e-09	0.825
2790	c3007_g1_i1	chromodomain-helicase-dna-binding protein 5	571	20	5.91137e-11	0.646
935	c1006_g1_i1	chromodomain-helicase-dna-binding protein 7	1429	20	7.59003e-19	0.6865
8384	c35041_g1_i1	chromodomain-helicase-dna-binding protein 7	1234	8	1.64052e-15	0.6475
11719	c38466_g1_i1	chromodomain-helicase-dna-binding protein 7	297	20	5.6237e-17	0.6695
20836	c14084_g1_i1	chromodomain-helicase-dna-binding protein 7	696	20	1.14871e-28	0.7015
27929	c21348_g1_i1	chromodomain-helicase-dna-binding protein 7	362	20	7.75636e-35	0.8355
32125	c25640_g1_i1	chromodomain-helicase-dna-binding protein 7	670	20	1.88081e-101	0.7955
19608	c12837_g1_i1	chromodomain-helicase-dna-binding protein mi-2 homolog	267	20	1.10513e-17	0.688
21546	c14807_g1_i1	chromodomain-helicase-dna-binding protein mi-2 homolog	1060	20	0	0.892
21007	c14258_g1_i1	chromosome 6 open reading frame isoform	214	20	4.76504e-10	0.7315
11012	c37735_g1_i1	chromosome-associated kinesin kif4-like isoform x2	224	20	5.46127e-12	0.71
3283	c3576_g1_i1	cip1-interacting zinc finger	3619	20	5.10481e-12	0.43
23223	c16520_g1_i1	circadian isoform i	212	20	1.49584e-32	0.892
4278	c4716_g1_i1	circumsporozoite protein	1668	20	6.2281e-10	0.6555
17605	c10794_g1_i1	citrate lyase subunit beta-like mitochondrial	383	20	5.17464e-19	0.8065
8126	c34782_g1_i1	citrate lyase subunit beta-like mitochondrial-like	571	20	1.10684e-69	0.8065
19439	c12668_g1_i1	citrate synthase	2110	20	0	0.8595
8452	c35109_g1_i1	Cj-cadherin	267	5	1.11638e-31	0.66
414	c435_g1_i1	c-jun-amino-terminal kinase-interacting protein 4	1129	20	3.87699e-118	0.65
33411	c26959_g1_i1	cklf-like marvel transmembrane domain-containing protein 4	332	8	2.89852e-16	0.5475
24292	c17636_g1_i1	cklf-like marvel transmembrane domain-containing protein 4-like	1674	20	1.72131e-83	0.738
12014	c6139_g1_i2	cklf-like marvel transmembrane domain-containing protein 8-like isoform x1	1950	20	7.38502e-20	0.6385
12015	c6139_g1_i3	cklf-like marvel transmembrane domain-containing protein 8-like isoform x1	1935	20	9.84657e-20	0.639
28590	c22034_g1_i1	class a rhodopsin-like g-protein coupled receptor	275	20	2.19776e-21	0.677
30394	c23887_g1_i1	class i ii	309	7	3.70921e-07	0.55
24773	c18123_g1_i1	class type	283	1	4.3279e-07	0.77
1977	c2097_g1_i1	clathrin coat assembly protein	614	20	1.14338e-11	0.474
31432	c24936_g1_i1	clathrin interactor 1-like	755	20	1.01241e-88	0.8485
5121	c5513_g1_i1	clathrin light chain	581	20	2.41264e-34	0.7965
5122	c5513_g1_i2	clathrin light chain	711	4	1.39813e-30	0.6425
5123	c5513_g1_i3	clathrin light chain	620	20	5.05162e-35	0.7655
5124	c5513_g1_i4	clathrin light chain	921	20	1.15771e-60	0.6475
3110	c3370_g1_i1	clathrin-associated protein	1647	20	0	0.948
35380	c28977_g1_i1	cleavage and polyadenylation specificity	1470	20	6.68183e-38	0.9095
19407	c12636_g1_i1	cleavage and polyadenylation specificity factor subunit 1	768	20	6.00329e-35	0.609
34519	c28110_g1_i1	cleavage and polyadenylation specificity factor subunit 1	323	20	1.27292e-07	0.622
2510	c2689_g1_i1	cleavage and polyadenylation specificity factor subunit 1-like	329	20	2.9068e-22	0.7735
34174	c27753_g1_i1	cleavage and polyadenylation specificity factor subunit 1-like	335	20	7.29276e-39	0.734
37434	c31070_g1_i1	cleavage and polyadenylation specificity factor subunit 1-like	245	20	1.60763e-23	0.722
11679	c38422_g1_i1	cleavage and polyadenylation specificity factor subunit 3	325	20	6.88472e-57	0.8995
31945	c25457_g1_i1	cleavage and polyadenylation specificity factor subunit 3	367	20	1.20943e-37	0.745
10324	c37025_g1_i1	cleavage and polyadenylation specificity factor subunit 3-like	462	20	1.06317e-43	0.756
34141	c27720_g1_i1	cleavage and polyadenylation specificity factor subunit 3-like	215	20	1.2493e-32	0.8425
25279	c18637_g1_i1	cleavage and polyadenylation specificity factor subunit 4-like	296	20	3.76167e-20	0.772
33046	c26582_g1_i1	cleavage and polyadenylation specificity factor subunit 4-like	203	20	4.6698e-24	0.7525
725	c791_g1_i1	cleavage and polyadenylation specificity factor subunit 5-like	825	20	5.67669e-135	0.8765
30746	c24242_g1_i1	cleavage and polyadenylation specificity factor subunit cg7185-like isoform x2	646	20	1.02883e-46	0.7985
21147	c14401_g1_i1	cleavage stimulation factor 64 kda subunit	257	20	3.02793e-24	0.8285
7038	c33688_g1_i1	cleavage stimulation factor subunit 1-like	328	20	5.31415e-39	0.741
15825	c8972_g1_i1	cleavage stimulation factor subunit 1-like	206	20	2.33528e-26	0.829
35576	c29178_g1_i1	cleavage stimulation factor subunit 2-like	542	20	3.72481e-11	0.867
1393	c1499_g1_i1	cleft lip and palate transmembrane protein 1 homolog	1309	20	1.04854e-97	0.6855
1394	c1499_g1_i2	cleft lip and palate transmembrane protein 1 homolog	1753	20	0	0.759
10774	c37489_g1_i1	cleft lip and palate transmembrane protein 1 homolog	224	20	2.9388e-24	0.887
8308	c34965_g1_i1	clip-associating protein 1	795	20	2.17725e-73	0.722
28100	c21526_g1_i1	clip-associating protein 1	384	20	1.07166e-26	0.6155
37245	c30875_g1_i1	clip-associating protein 1 isoform x4	1065	20	6.82125e-100	0.6515
7899	c34551_g1_i1	clip-associating protein 1-a-like isoform 1	941	20	5.39745e-23	0.601
25184	c18540_g1_i1	clip-associating protein 1-a-like isoform 2	495	20	8.41159e-46	0.72
31682	c25189_g1_i1	clip-associating protein 1-a-like isoform 2	233	20	2.87377e-12	0.684
35680	c29282_g1_i1	clock 1-7	799	1	8.71854e-11	0.81
20541	c13783_g1_i1	clock-like protein	432	20	1.04967e-82	0.839
4849	c5236_g1_i1	clotting protein precursor	767	5	1.627e-55	0.522
5110	c5491_g1_i1	clotting protein precursor	2589	16	0	0.4425
24829	c18178_g1_i1	clusterin-associated protein 1	419	20	5.6425e-31	0.662
29492	c22980_g1_i1	clusterin-associated protein 1-like	796	20	1.41125e-11	0.5835
18866	c12091_g1_i1	cmgc dyrk protein kinase	3771	20	1.3979e-80	0.548
30368	c23861_g1_i1	cmp-sialic acid transporter	1328	20	4.43863e-131	0.718
30291	c23784_g1_i1	c-myc promoter-binding isoform x3	268	20	3.93151e-13	0.6465
18457	c11670_g1_i1	c-myc promoter-binding protein isoform x5	217	20	2.31038e-26	0.814
7021	c33670_g1_i1	c-myc-binding protein	488	20	1.05781e-14	0.6315
24092	c17435_g1_i1	cnot1 protein	929	20	0	0.897
24775	c18125_g1_i1	coagulation factor v-like	376	5	2.96928e-13	0.652
4940	c5326_g1_i1	coagulation factor x	3312	20	1.57497e-109	0.6255
35556	c29157_g1_i1	coatomer protein complex subunit delta	357	20	1.65955e-48	0.964
9121	c35794_g1_i1	coatomer subunit alpha	246	20	4.09246e-25	0.7395
35367	c28964_g1_i1	coatomer subunit alpha	659	20	4.4985e-58	0.649
6864	c33512_g1_i1	coatomer subunit alpha isoform x2	241	20	4.52665e-47	0.939
33680	c27240_g1_i1	coatomer subunit alpha-like	247	20	7.2648e-39	0.8755
9837	c36526_g1_i1	coatomer subunit beta	589	20	5.51736e-92	0.879
19242	c12471_g1_i1	coatomer subunit beta	1322	20	0	0.9195
25502	c18861_g1_i1	coatomer subunit beta	434	20	3.717e-74	0.947
29944	c23435_g1_i1	coatomer subunit beta	2575	20	0	0.8125
31057	c24555_g1_i1	coatomer subunit beta	540	20	4.27681e-65	0.786
38492	c32154_g1_i1	coatomer subunit beta	357	20	1.05619e-28	0.7435
35704	c29306_g1_i1	coatomer subunit delta	1724	20	1.14699e-148	0.695
15615	c8759_g1_i1	coatomer subunit epsilon	995	20	5.28753e-125	0.7865
14015	c7137_g1_i1	coatomer subunit gamma-2	2639	20	0	0.7985
8629	c35291_g1_i1	coatomer subunit partial	548	20	7.36953e-108	0.909
19166	c12393_g1_i1	coatomer subunit zeta-1-like isoform 1	713	20	1.24042e-94	0.866
25378	c18736_g1_i1	cobw domain-containing protein 1	244	20	4.1916e-34	0.8455
15792	c8939_g1_i1	cobw domain-containing protein 2-like isoform x1	204	20	1.00665e-06	0.5835
19672	c12902_g1_i1	coenzyme q-binding protein coq10 homolog mitochondrial-like	1564	20	1.80815e-72	0.751
30023	c23514_g1_i1	cohesin subunit sa-	329	20	8.74295e-23	0.619
9661	c36347_g1_i1	cohesin subunit sa-1-like	439	20	4.3691e-84	0.92
25770	c19132_g1_i1	cohesin subunit sa-1-like	234	20	3.61746e-21	0.8185
28247	c21675_g1_i1	cohesin subunit sa-1-like	397	20	2.29541e-57	0.8825
32543	c26070_g1_i1	cohesin subunit sa-1-like	436	20	1.11048e-77	0.9735
34071	c27644_g1_i1	cohesin subunit sa-1-like	322	20	4.69407e-50	0.8405
36884	c30501_g1_i1	cohesin subunit sa-1-like	531	20	4.47397e-14	0.892
7427	c34074_g1_i1	coiled-coil and c2 domain-containing protein 1b isoform x1	1234	20	6.72502e-35	0.47
32131	c25646_g1_i1	coiled-coil and c2 domain-containing protein 1-like	274	20	8.09061e-23	0.715
24517	c17863_g1_i1	coiled-coil domain-containing	302	5	4.53827e-08	0.582
34380	c27969_g1_i1	coiled-coil domain-containing protein 102a-like	235	20	1.77847e-20	0.8155
7288	c33937_g1_i1	coiled-coil domain-containing protein 115	701	20	5.29796e-14	0.4665
25552	c18912_g1_i1	coiled-coil domain-containing protein 124	641	20	4.67341e-39	0.677
10068	c36763_g1_i1	coiled-coil domain-containing protein 12-like	1052	20	3.16637e-15	0.6365
29833	c23322_g1_i1	coiled-coil domain-containing protein 130 homolog	266	20	1.55227e-46	0.873
24821	c18170_g1_i1	coiled-coil domain-containing protein 135-like	390	8	1.97976e-10	0.4988
485	c506_g1_i2	coiled-coil domain-containing protein 137-like isoform 1	1014	20	3.44492e-16	0.536
4628	c5065_g2_i1	coiled-coil domain-containing protein 43-like	881	20	5.26891e-28	0.603
1074	c1131_g1_i1	coiled-coil domain-containing protein 47	590	20	1.49805e-53	0.7315
36150	c29762_g1_i1	coiled-coil domain-containing protein 47-like	314	20	1.68819e-36	0.7555
4755	c5161_g1_i1	coiled-coil domain-containing protein 58	1244	20	1.53474e-28	0.6645
4756	c5161_g1_i2	coiled-coil domain-containing protein 58-like	1099	20	2.17391e-29	0.6415
31004	c24502_g1_i1	coiled-coil domain-containing protein 6-like	2002	20	3.6469e-113	0.8465
36374	c29990_g1_i1	coiled-coil domain-containing protein 94	1033	20	9.67381e-72	0.826
27851	c21269_g1_i1	coiled-coil domain-containing protein agap005037	351	3	1.81863e-10	0.5933
6836	c33484_g1_i1	coiled-coil domain-containing protein cg32809-like	597	7	3.56716e-08	0.6643
35155	c28748_g1_i1	coiled-coil-helix-coiled-coil-helix domain-containing protein 1-like	511	20	4.92491e-26	0.6845
2485	c2665_g1_i1	coiled-coil-helix-coiled-coil-helix domain-containing protein mitochondrial precursor	752	20	2.11015e-17	0.8595
2486	c2665_g1_i2	coiled-coil-helix-coiled-coil-helix domain-containing protein mitochondrial precursor	727	20	1.91322e-17	0.8595
7123	c33773_g1_i1	coiled-coil-helix-coiled-coil-helix domain-containing protein mitochondrial-like	1116	20	2.14049e-17	0.5735
10065	c36760_g1_i1	cold shock domain-containing protein cg9705-like	303	20	2.56827e-38	0.7585
30926	c24424_g1_i1	cold shock domain-containing protein e1-like	3034	20	0	0.765
15390	c8531_g1_i1	collagen alpha 1 chain	344	20	3.59774e-41	0.829
22717	c16001_g1_i1	collagen alpha 1 chain	271	20	1.25756e-22	0.655
34797	c28389_g1_i1	collagen alpha 1 chain	212	2	2.5991e-08	0.77
21254	c14509_g1_i1	collagen alpha- chain	411	20	1.26151e-71	0.845
19905	c13140_g1_i1	collagen alpha-1 chain	418	6	1.07763e-06	0.6683
26843	c20236_g1_i1	collagen alpha-1 chain	971	20	1.5372e-92	0.6515
29983	c23475_g1_i1	collagen alpha-1 chain	522	20	3.08298e-67	0.798
35139	c28732_g1_i1	collagen alpha-1 chain	508	20	9.26105e-21	0.561
6591	c33225_g1_i1	collagen alpha-1 chain-like	262	20	1.92525e-18	0.757
8154	c34810_g1_i1	collagen alpha-1 chain-like	351	5	2.42547e-08	0.554
12577	c6356_g1_i1	collagen alpha-1 chain-like	1729	20	9.14749e-106	0.758
12578	c6356_g1_i2	collagen alpha-1 chain-like	5906	20	2.43186e-109	0.754
22800	c16085_g1_i1	collagen alpha-1 chain-like	427	20	3.14597e-08	0.5645
22258	c15532_g1_i1	collagen alpha-2 chain	383	20	1.2803e-08	0.5895
24753	c18102_g1_i1	collagen alpha-2 chain	369	20	1.08911e-08	0.5115
6995	c33643_g1_i1	collagen alpha-2 chain-like	604	20	1.34316e-20	0.562
16326	c9481_g1_i1	collagen alpha-2 partial	328	6	1.38955e-08	0.5183
22582	c15864_g1_i1	collagen alpha-3 chain	203	20	7.79267e-09	0.683
6747	c33396_g1_i1	collagen alpha-5 chain	1564	4	1.40799e-07	0.495
8956	c35626_g1_i1	collagen alpha-5 chain	321	20	1.61803e-27	0.8785
36969	c30588_g1_i1	collagen alpha-6 chain	614	20	4.45915e-38	0.907
4672	c5099_g1_i1	collagen and calcium-binding egf domain-containing protein 1	1489	20	3.76486e-61	0.548
5197	c5579_g1_i1	collagen-like protein 1-like	514	4	6.31706e-09	0.595
33710	c27270_g1_i1	colmedin	318	20	1.21861e-41	0.797
37510	c31149_g1_i1	colorectal mutant cancer	283	10	7.38596e-11	0.729
3428	c3753_g1_i2	comm domain-containing protein 10-like	835	20	1.08801e-12	0.6305
2433	c2612_g1_i1	comm domain-containing protein 2	922	20	4.84611e-48	0.579
30217	c23709_g1_i1	comm domain-containing protein 5-like	891	20	7.47123e-39	0.5745
20451	c13693_g1_i1	comm domain-containing protein 7	1043	20	8.03589e-16	0.609
3182	c3457_g1_i1	complement component	1330	20	3.08391e-110	0.691
4056	c4430_g1_i1	complex iii assembly factor lyrm7-like	565	20	9.0631e-21	0.6615
4057	c4430_g1_i2	complex iii assembly factor lyrm7-like	583	20	2.50685e-24	0.677
35721	c29324_g1_i1	connectin-like	1015	20	4.43677e-52	0.614
16260	c9414_g1_i1	connector enhancer of kinase suppressor of ras 3	214	20	1.84417e-20	0.79
3586	c3945_g1_i1	conserved hypothetical protein	960	1	2.68121e-07	0.42
3684	c4072_g1_i2	conserved hypothetical protein	1597	3	2.92628e-08	0.6367
3981	c4356_g1_i1	conserved hypothetical protein	3236	20	0	0.623
4163	c4582_g1_i1	conserved hypothetical protein	831	12	4.62488e-08	0.4708
4954	c5343_g1_i1	conserved hypothetical protein	298	7	3.33352e-07	0.4686
6774	c33423_g1_i1	conserved hypothetical protein	820	20	1.33613e-81	0.584
7009	c33658_g1_i1	conserved hypothetical protein	955	1	5.41516e-10	0.5
7940	c34592_g1_i1	conserved hypothetical protein	482	1	1.08451e-06	0.58
9289	c35966_g1_i1	conserved hypothetical protein	512	1	7.36204e-07	0.5
16250	c9404_g1_i1	conserved hypothetical protein	440	1	5.35699e-08	0.62
18691	c11919_g1_i1	conserved hypothetical protein	1243	20	4.42673e-117	0.586
19754	c12984_g1_i1	conserved hypothetical protein	1494	2	6.3533e-08	0.545
20822	c14067_g1_i1	conserved hypothetical protein	695	1	7.15579e-06	0.67
21444	c14702_g1_i1	conserved hypothetical protein	725	7	6.06268e-15	0.5357
24205	c17549_g1_i1	conserved hypothetical protein	1232	20	5.60664e-121	0.655
24910	c18260_g1_i1	conserved hypothetical protein	507	1	1.73141e-07	0.47
25122	c18477_g1_i1	conserved hypothetical protein	236	4	7.01528e-14	0.7225
27173	c20577_g1_i1	conserved hypothetical protein	409	1	4.30388e-06	0.45
35566	c29168_g1_i1	conserved hypothetical protein	1532	2	7.86426e-10	0.535
1670	c1805_g1_i1	conserved hypothetical protein, partial	230	17	1.13587e-12	0.6124
12263	c6243_g3_i1	conserved hypothetical protein, partial	201	15	1.87757e-12	0.6367
932	c1001_g1_i1	conserved insect protein	2331	20	1.01487e-26	0.5725
13928	c7049_g1_i1	conserved oligomeric golgi complex subunit 2	542	20	1.89526e-24	0.5885
15323	c8464_g1_i1	conserved oligomeric golgi complex subunit 2	506	20	6.45237e-38	0.581
15885	c9033_g1_i1	conserved oligomeric golgi complex subunit 2	428	20	6.02285e-10	0.581
34048	c27620_g1_i1	conserved oligomeric golgi complex subunit 2-like	248	20	4.20251e-26	0.8135
28711	c22166_g1_i1	conserved oligomeric golgi complex subunit 3	268	20	6.82699e-17	0.6215
13817	c6939_g1_i1	conserved oligomeric golgi complex subunit 4	237	20	2.13447e-08	0.6315
9272	c35949_g1_i1	conserved oligomeric golgi complex subunit 4-like	272	20	3.47328e-23	0.661
6602	c33240_g1_i1	conserved oligomeric golgi complex subunit 6	255	20	1.11491e-20	0.699
30263	c23756_g1_i1	conserved oligomeric golgi complex subunit 6-like	470	20	9.49509e-33	0.581
32062	c25577_g1_i1	conserved oligomeric golgi complex subunit 6-like	545	20	3.93927e-36	0.583
31436	c24940_g1_i1	conserved oligomeric golgi complex subunit 7	215	20	2.86192e-16	0.6945
6826	c33474_g1_i1	conserved oligomeric golgi complex subunit 7-like	870	20	1.69427e-43	0.486
11346	c38080_g1_i1	conserved oligomeric golgi complex subunit 7-like	341	20	1.58179e-16	0.6205
23377	c16682_g1_i1	conserved oligomeric golgi complex subunit 8	254	20	5.31313e-12	0.6195
18188	c11398_g1_i1	conserved Plasmodium protein, unknown function	390	1	1.47818e-06	0.55
14633	c7764_g1_i1	conserved protein	612	20	2.31193e-11	0.605
26288	c19664_g1_i1	conserved protein	202	20	1.20974e-19	0.7505
28335	c21765_g1_i1	constitutive coactivator of peroxisome proliferator-activated receptor gamma	214	20	6.84625e-16	0.6685
31052	c24550_g1_i1	constitutive coactivator of peroxisome proliferator-activated receptor gamma	334	20	3.3223e-23	0.622
7241	c33890_g1_i1	constitutive coactivator of ppar-gamma-like protein 1 homolog	394	20	4.98653e-46	0.707
7494	c34141_g1_i1	constitutive coactivator of ppar-gamma-like protein 1 homolog	910	20	1.20348e-82	0.7045
32129	c25644_g1_i1	constitutive coactivator of ppar-gamma-like protein 1 homolog	391	20	1.01062e-58	0.7775
3865	c4253_g1_i1	cop9 complex subunit 7a	1252	20	1.05855e-87	0.6985
3866	c4253_g1_i2	cop9 complex subunit 7a	1193	20	6.0361e-88	0.698
341	c355_g1_i1	cop9 signalosome complex subunit 1	2260	20	0	0.806
24540	c17886_g1_i1	cop9 signalosome complex subunit 2 isoform x2	1674	20	0	0.929
2072	c2212_g1_i1	cop9 signalosome complex subunit 3	1443	20	1.09129e-176	0.74
13377	c6497_g1_i1	cop9 signalosome complex subunit 4	1766	20	0	0.854
1501	c1613_g1_i1	cop9 signalosome complex subunit 5	590	20	1.25369e-47	0.844
22816	c16101_g1_i1	cop9 signalosome complex subunit 5	373	20	1.07443e-83	0.943
14782	c7917_g1_i1	cop9 signalosome complex subunit 5-like	231	20	4.54031e-44	0.9345
34766	c28358_g1_i1	cop9 signalosome complex subunit 6	1995	20	0	0.843
24297	c17641_g1_i1	cop9 signalosome complex subunit 8	865	20	3.91972e-58	0.6505
24529	c17875_g1_i1	copine- partial	244	20	1.78366e-24	0.742
14098	c7223_g1_i1	copine-2 isoform x2	247	20	5.57378e-27	0.756
17936	c11139_g1_i1	copine-5	216	20	2.47794e-11	0.7565
26494	c19877_g1_i1	copine-5-like isoform x2	234	20	1.9229e-15	0.7065
871	c931_g1_i1	copine-8	331	20	3.61598e-39	0.829
872	c931_g1_i2	copine-8	683	20	5.13694e-32	0.816
18408	c11620_g1_i1	copine-8	279	20	9.51779e-31	0.741
36415	c30031_g1_i1	copine-8- partial	409	20	6.38501e-38	0.674
31664	c25170_g1_i1	copine-8-like isoform 2	275	20	1.29462e-37	0.8575
1617	c1741_g1_i1	copper homeostasis protein	383	20	1.65087e-12	0.57
1618	c1741_g1_i2	copper homeostasis protein cutc homolog	695	20	2.18183e-58	0.6495
36386	c30002_g1_i1	copper transport protein	294	20	6.65915e-27	0.7845
8829	c35496_g1_i1	copper zinc superoxide dismutase	905	20	2.89659e-59	0.622
32234	c25753_g1_i1	cordon-bleu 1 (cobl-related protein 1)	291	20	1.47321e-22	0.628
1955	c2073_g1_i1	corepressor interacting with rbpj 1-like	1866	20	1.6052e-60	0.7405
30794	c24291_g1_i1	corepressor interacting with rbpj 1-like	212	20	1.01362e-19	0.94
113	c102_g1_i2	coronin-1b-like isoform x1	1986	20	0	0.7665
112	c102_g1_i1	coronin-1b-like isoform x2	2058	20	0	0.7665
33560	c27112_g1_i1	coronin-2b-like isoform 1	327	20	3.22472e-27	0.805
6574	c33208_g1_i1	coronin-2b-like isoform 2	359	20	1.05518e-48	0.74
37856	c31498_g1_i1	cortactin-binding protein 2	373	1	1.34888e-09	0.6
21225	c14479_g1_i1	cortactin-binding protein 2-like isoform x2	308	3	1.99035e-07	0.5
3469	c3798_g1_i1	cox assembly mitochondrial protein 2 homolog	1001	20	1.31248e-20	0.718
27308	c20714_g1_i1	cox assembly mitochondrial protein homolog	439	20	3.85617e-44	0.7315
11333	c38067_g1_i1	cp2l1_panar ame: full=cytochrome p450 2l1 ame: full=cypiil1	236	4	1.10277e-08	0.615
3013	c3259_g1_i1	cpg binding protein	655	20	1.71941e-12	0.657
2906	c3133_g1_i1	cpg-binding protein isoform x2	502	20	1.1187e-08	0.6065
2907	c3133_g1_i2	cpg-binding protein isoform x2	487	20	1.20437e-08	0.5945
12289	c6259_g1_i1	craniofacial development protein 2-like	207	11	4.91574e-06	0.66
13273	c6471_g1_i2	craniofacial development protein 2-like	1220	20	2.27735e-25	0.496
9053	c35724_g1_i1	creb-binding protein	337	20	9.89764e-14	0.822
9746	c36433_g1_i1	creb-binding protein	220	20	1.14742e-39	0.927
20703	c13947_g1_i1	creb-binding protein	349	10	2.46388e-09	0.599
28053	c21479_g1_i1	creb-binding protein	211	20	8.87483e-26	0.748
35646	c29247_g1_i1	cre-dapk-1 protein	505	20	7.99717e-08	0.565
27628	c21042_g1_i1	cre-him-4 protein	237	20	1.07409e-09	0.596
19924	c13159_g1_i1	cre-tyr-3 protein	639	20	4.16933e-18	0.5375
34008	c27577_g1_i1	crooked neck	207	20	2.42659e-20	0.988
8515	c35173_g1_i1	crustacean hematopoietic factor	678	4	1.36865e-09	0.5575
17452	c10637_g1_i1	cryptochrome 2	233	20	8.54504e-34	0.805
9505	c36189_g1_i1	ctd small phosphatase-like protein 2	467	20	4.48117e-68	0.887
14771	c7905_g1_i1	ctd small phosphatase-like protein 2	1296	20	3.18861e-46	0.8505
1907	c2032_g1_i1	c-terminal kinesin	395	20	1.68669e-12	0.683
13269	c6470_g3_i2	c-terminal kinesin	1198	1	6.62598e-06	0.73
29557	c23045_g1_i1	c-terminal-binding	808	20	2.01033e-110	0.8715
31784	c25292_g1_i1	ctp synthase 1-like	215	20	5.58897e-31	0.878
11898	c38660_g1_i1	ctp synthase 2	213	20	3.5877e-33	0.8835
14650	c7781_g1_i1	cttnbp2 n-terminal-like protein	687	20	1.19124e-75	0.7315
13334	c6481_g3_i1	c-type lectin domain family 4 member e-like	516	20	2.05202e-11	0.461
13336	c6481_g3_i2	c-type lectin domain family 4 member e-like	595	19	3.57086e-08	0.4721
29476	c22964_g1_i1	c-type lectin domain family 4 member f-like	1265	20	8.33783e-09	0.4345
13647	c6768_g1_i1	c-type lectin partial	220	1	5.95789e-23	0.89
31674	c25181_g1_i1	c-type lectin partial	284	1	3.65223e-18	0.71
3640	c4015_g1_i1	c-type lectin-like domain-containing protein	258	1	4.85648e-06	0.53
7934	c34586_g1_i1	cubilin	1854	20	1.90412e-07	0.4855
15859	c9006_g1_i1	cue domain-containing protein 2-like	1037	20	1.18871e-53	0.575
27569	c20982_g1_i1	cullin 3-like	311	20	4.35494e-48	0.9355
15913	c9062_g1_i1	cullin 4b	530	20	2.67939e-56	0.725
30196	c23688_g1_i1	cullin 5	3073	20	0	0.8895
34960	c28552_g1_i1	cullin- isoform b	422	20	1.99433e-44	0.757
25877	c19241_g1_i1	cullin-1-like isoform 1	660	20	1.83065e-124	0.895
37518	c31157_g1_i1	cullin-1-like isoform 1	274	20	6.0221e-48	0.928
27376	c20785_g1_i1	cullin-1-like isoform x1	207	20	4.82082e-27	0.8425
19605	c12834_g1_i1	cullin-2 isoform x2	1220	20	9.98897e-149	0.721
34309	c27894_g1_i1	cullin-2 isoform x2	226	20	1.16166e-32	0.8945
9907	c36597_g1_i1	cullin-3	343	20	2.11294e-60	0.8725
22183	c15456_g1_i1	cullin-3	330	20	1.08427e-49	0.929
8304	c34960_g1_i1	cullin-3-like isoform 1	1165	20	8.19577e-125	0.7595
38108	c31759_g1_i1	cullin-3-like isoform x1	212	20	4.10838e-13	0.837
13549	c6670_g1_i1	cullin-4b-like	1402	20	0	0.8565
34678	c28269_g1_i1	cullin-4b-like	610	20	1.42237e-84	0.818
24320	c17664_g1_i1	cullin-5-like isoform x1	1146	20	2.93178e-151	0.8105
36499	c30115_g1_i1	cullin-associated and neddylation-dissociated partial	318	20	7.87485e-35	0.753
8726	c35389_g1_i1	cullin-associated and neddylation-dissociated protein 1	538	20	3.62158e-56	0.7575
9397	c36076_g1_i1	cullin-associated nedd8-dissociated protein 1	782	20	1.79927e-97	0.8265
19494	c12723_g1_i1	cullin-associated nedd8-dissociated protein 1 isoform x2	855	20	2.10806e-141	0.8425
17529	c10716_g1_i1	cullin-associated nedd8-dissociated protein 1-like	345	20	4.16546e-51	0.949
25508	c18867_g1_i1	cullin-associated nedd8-dissociated protein 1-like	947	20	1.25452e-156	0.879
593	c655_g1_i1	cuticular protein analogous to peritrophins 1-f precursor	642	20	1.24206e-33	0.629
594	c655_g1_i2	cuticular protein analogous to peritrophins 1-f precursor	535	20	9.62054e-33	0.6315
16234	c9388_g1_i1	cwf19-like protein 1	282	20	1.52725e-30	0.6995
16576	c9734_g1_i1	cwf19-like protein 1	243	20	1.7995e-26	0.796
9750	c36438_g1_i1	cwf19-like protein 2	202	20	1.18726e-24	0.7625
31261	c24761_g1_i1	cwf19-like protein 2	276	20	8.26549e-22	0.6565
406	c428_g1_i1	cyclase	1708	20	8.08035e-68	0.6185
407	c428_g1_i2	cyclase	1397	20	3.53929e-68	0.62
19886	c13121_g1_i1	cyclic amp-dependent transcription factor atf-2 isoform x2	853	20	6.87537e-08	0.713
20067	c13303_g1_i1	cyclic amp-dependent transcription factor atf-6 alpha	477	20	3.58988e-28	0.6715
1027	c1095_g1_i1	cyclic amp-regulated protein	1333	20	1.34924e-80	0.791
37131	c30756_g1_i1	cyclic amp-responsive element-binding protein 1-like isoform 1	346	20	2.84433e-13	0.5505
24381	c17725_g1_i1	cyclic nucleotide-gated cation channel 4	275	20	5.47744e-16	0.6825
8503	c35161_g1_i1	cyclic nucleotide-gated cation channel beta-1	258	20	4.26856e-14	0.658
24274	c17618_g1_i1	-cyclic-nucleotide 2-	306	20	1.98407e-13	0.644
16259	c9413_g1_i1	cyclin b	404	20	1.36734e-76	0.852
31328	c24831_g1_i1	cyclin fold	1020	20	1.75276e-169	0.853
18959	c12185_g1_i1	cyclin g	2068	20	1.86746e-54	0.5545
24539	c17885_g1_i1	cyclin h	635	20	6.44869e-65	0.652
35128	c28721_g1_i1	cyclin h	674	20	3.88794e-96	0.733
1697	c1833_g1_i1	cyclin i	988	20	8.82344e-25	0.557
24051	c17393_g1_i1	cyclin l1 variant 2	3177	20	1.69495e-83	0.827
10543	c37249_g1_i1	cyclin-c-like	391	20	7.07022e-32	0.8405
31767	c25275_g1_i1	cyclin-d1-binding protein 1 homolog	245	3	1.69878e-07	0.5633
35830	c29434_g1_i1	cyclin-d-binding myb-like transcription factor 1-like	2833	20	2.02798e-114	0.727
9104	c35776_g1_i1	cyclin-dependent kinase 12-like	513	20	5.37053e-82	0.848
3140	c3401_g1_i1	cyclin-dependent kinase 14-like	1604	20	0	0.798
[truncated: 36,939 more rows]
