# Supplementary material for: Comparative molecular analyses of select pH- and osmoregulatory genes in three freshwater crayfish Cherax quadricarinatus, C. destructor and C. cainii
Source: PeerJ. 2017 Aug 24;5:e3623. doi: 10.7717/peerj.3623 (PMC5572425; doi:10.7717/peerj.3623)
Supplement: File S5 — Annotated information of all the assembled contings obtained from nerves of freshwater crayfish Cherax quadricarinatus. Reads which met our quality criteria (Q > 30, N bases <1%) were accepted for assembly. The filtered reads were assembled with the Trinity short read de novo assembler using the stranded option for Illumina data (Version 2014-04-13p1) and the unstranded option for Ion Torrent data. Assembled data were used as BLASTx queries against the NCBI NR protein database using BLAST + (Version 2.2.29) with a stringency of 10 × e−5. First row contains information on: number of original contigs, sequence length (contig length bp), seq. description (gene names), number of HITs and mean e-values (stringency). [file peerj-05-3623-s007.xlsx]

## Sheet: seq_table_Nerve
Contig #	Original Contig	Seq. Description	Seq. Length	#Hits	min. eValue	mean Similarity
7930	c8253_g1_i1	1 cg31094-pe	1544	5	2.82038e-18	0.466
7179	c7524_g1_i1	10 kda heat shock mitochondrial-like	1011	20	3.82944e-41	0.801
60312	c57450_g1_i1	116 kda u5 small nuclear ribonucleoprotein component isoform x1	2115	20	0	0.889
37653	c34357_g1_i1	116 kda u5 small nuclear ribonucleoprotein component-like	723	20	3.79791e-86	0.799
14522	c14359_g2_i1	12 kda fk506-binding	207	6	4.32649e-09	0.6333
16222	c15250_g1_i2	12 kda fk506-binding	215	20	1.53149e-11	0.7805
7528	c7827_g1_i1	14 kda phosphohistidine phosphatase	922	20	1.62455e-40	0.7145
50949	c47925_g1_i1	14-3-3 protein epsilon	4273	20	9.53091e-147	0.9515
1556	c1673_g1_i1	14-3-3 zeta	2515	20	5.13719e-172	0.958
397	c392_g1_i1	15 kda selenoprotein	1095	20	1.19092e-56	0.706
17980	c15754_g1_i2	150 kda dynein-associated polypeptide	5440	20	0	0.609
15145	c14724_g1_i1	15-hydroxyprostaglandin dehydrogenase	889	20	4.79852e-59	0.591
15146	c14724_g1_i2	15-hydroxyprostaglandin dehydrogenase	942	20	6.43938e-59	0.591
60786	c57929_g1_i1	15-hydroxyprostaglandin dehydrogenase	379	20	3.69402e-12	0.6305
92	c99_g1_i1	1700123o20rik protein	1347	20	3.05701e-19	0.6165
56150	c53186_g1_i1	1-acylglycerophosphocholine o-acyltransferase 1-like	547	20	2.33279e-16	0.7295
59995	c57129_g1_i1	1-acyl-sn-glycerol-3-phosphate acyltransferase alpha-like	236	20	7.40797e-14	0.658
63441	c60629_g1_i1	1-acyl-sn-glycerol-3-phosphate acyltransferase alpha-like	425	20	4.51256e-46	0.705
7308	c7631_g1_i1	1-acyl-sn-glycerol-3-phosphate acyltransferase epsilon	2042	20	5.30945e-109	0.636
3789	c3942_g1_i1	1-acyl-sn-glycerol-3-phosphate acyltransferase gamma-like	1455	20	8.32352e-130	0.6735
2788	c2869_g1_i1	1-aminocyclopropane-1-carboxylate synthase-like protein 1-like	1745	20	1.10146e-87	0.5465
7448	c7752_g1_i1	1-associated eps domain-containing	2460	20	1.1743e-108	0.535
46243	c43104_g1_i1	1-o-acylceramide synthase	766	20	1.5922e-97	0.6855
31921	c28490_g1_i1	1-phosphatidylinositol 3-phosphate 5-kinase	217	20	4.63386e-17	0.752
58610	c55733_g1_i1	1-phosphatidylinositol 3-phosphate 5-kinase isoform x2	359	20	4.27915e-17	0.561
8935	c9419_g1_i1	1-phosphatidylinositol -bisphosphate phosphodiesterase beta-2	4196	20	0	0.626
24557	c20966_g1_i1	1-phosphatidylinositol- -bisphosphate phosphodiesterase epsilon-1	305	20	6.8958e-35	0.7015
28523	c25054_g1_i1	1-phosphatidylinositol- -bisphosphate phosphodiesterase epsilon-1	876	20	4.40024e-76	0.638
38175	c34885_g1_i1	1-phosphatidylinositol- -bisphosphate phosphodiesterase epsilon-1	350	20	1.21421e-63	0.894
40831	c37583_g1_i1	1-phosphatidylinositol- -bisphosphate phosphodiesterase epsilon-1	902	20	6.35631e-85	0.5805
43693	c40526_g1_i1	1-phosphatidylinositol- -bisphosphate phosphodiesterase epsilon-1	993	20	4.93716e-125	0.7005
38062	c34772_g1_i1	1-phosphatidylinositol -bisphosphate phosphodiesterase epsilon-1-like	706	20	7.17888e-25	0.546
23696	c20094_g1_i1	1-phosphatidylinositol- -bisphosphate phosphodiesterase gamma-1	817	20	2.85412e-79	0.63
32207	c28783_g1_i1	1-phosphatidylinositol -bisphosphate phosphodiesterase gamma-1 isoform x2	242	20	3.45139e-41	0.9095
39153	c35872_g1_i1	1-phosphatidylinositol -bisphosphate phosphodiesterase gamma-1-like	380	20	1.86926e-19	0.752
63751	c60942_g1_i1	1-phosphatidylinositol- -bisphosphate phosphodiesterase gamma-1-like	445	20	3.53801e-41	0.6615
30884	c27438_g1_i1	1-phosphatidylinositol-3-phosphate 5-kinase	498	20	1.54535e-47	0.747
53756	c50743_g1_i1	1-phosphatidylinositol-3-phosphate 5-kinase-like	653	20	3.73058e-23	0.557
3543	c3649_g1_i2	2 -cyclic-nucleotide 3 -phosphodiesterase	427	19	2.01564e-11	0.7053
53002	c49984_g1_i1	2 -cyclic-nucleotide 3 -phosphodiesterase	730	20	1.5223e-32	0.456
3542	c3649_g1_i1	2 -cyclic-nucleotide 3 -phosphodiesterase-like	472	20	4.71573e-18	0.697
32783	c29378_g1_i1	2 -cyclic-nucleotide 3 -phosphodiesterase-like	652	20	2.6817e-28	0.502
51936	c48911_g1_i1	2 -phosphodiesterase 12	335	20	2.93137e-17	0.537
48269	c45166_g1_i1	2 -phosphodiesterase 12-like	341	20	3.2622e-32	0.657
37576	c34279_g1_i1	23s ribosomal rna	205	19	1.60091e-10	0.7153
36503	c33199_g1_i1	24-dehydrocholesterol reductase	291	20	1.25913e-41	0.721
28488	c25019_g1_i1	26s protease regulatory subunit 4-like	1567	20	0	0.9705
20614	c16964_g1_i1	26s protease regulatory subunit 6a	1523	20	0	0.932
20235	c16580_g1_i1	26s protease regulatory subunit 6b	1626	20	0	0.9335
52871	c49853_g1_i1	26s protease regulatory subunit 7	1572	20	0	0.958
1290	c1371_g1_i1	26s protease regulatory subunit 8-like	1564	20	0	0.96
21398	c17758_g1_i1	26s protease regulatory subunit s10b	1503	20	0	0.9515
18645	c15862_g4_i1	26s proteasome non-atpase regulatory	1800	4	4.84565e-11	0.6
38058	c34768_g1_i1	26s proteasome non-atpase regulatory subunit 10 isoform x1	1243	20	1.11773e-62	0.685
10628	c11152_g1_i1	26s proteasome non-atpase regulatory subunit 11-like	1475	20	2.34951e-174	0.815
4695	c4942_g1_i1	26s proteasome non-atpase regulatory subunit 12 isoform x1	1649	20	0	0.797
4696	c4942_g1_i2	26s proteasome non-atpase regulatory subunit 12 isoform x1	1734	20	0	0.797
49431	c46349_g1_i1	26s proteasome non-atpase regulatory subunit 13	474	20	2.05886e-23	0.6505
54027	c51018_g1_i1	26s proteasome non-atpase regulatory subunit 13-like	1159	20	1.5579e-104	0.7725
19216	c15941_g5_i1	26s proteasome non-atpase regulatory subunit 14	1279	20	0	0.9385
10280	c10810_g1_i1	26s proteasome non-atpase regulatory subunit 1-like	3419	20	0	0.7445
10281	c10810_g1_i2	26s proteasome non-atpase regulatory subunit 1-like	3524	20	0	0.7175
59367	c56498_g1_i1	26s proteasome non-atpase regulatory subunit 2-like	2991	20	0	0.829
20190	c16535_g1_i1	26s proteasome non-atpase regulatory subunit 4-like	1742	20	5.64165e-141	0.6835
50963	c47939_g1_i1	26s proteasome non-atpase regulatory subunit 5	864	20	2.19014e-56	0.593
55993	c53029_g1_i1	26s proteasome non-atpase regulatory subunit 5 isoform x1	373	20	2.74325e-16	0.539
2804	c2886_g1_i1	26s proteasome non-atpase regulatory subunit 6-like	1456	20	0	0.829
43613	c40447_g1_i1	26s proteasome non-atpase regulatory subunit 7-like	1081	20	1.29274e-145	0.8815
1686	c1787_g1_i1	26s proteasome non-atpase regulatory subunit 8	1046	20	2.19466e-96	0.7485
3344	c3407_g1_i1	26s proteasome non-atpase regulatory subunit 9	1045	20	3.41304e-60	0.666
3345	c3407_g1_i2	26s proteasome non-atpase regulatory subunit 9	1022	20	4.46469e-60	0.6685
8095	c8414_g1_i1	28 kda heat- and acid-stable phosphoprotein	2591	20	3.73909e-14	0.731
46060	c42920_g1_i1	28s ribosomal protein mitochondrial	1545	20	7.16315e-62	0.5505
52759	c49741_g1_i1	28s ribosomal protein mitochondrial	1026	20	6.12344e-45	0.7345
2823	c2909_g1_i1	28s ribosomal protein mitochondrial-like	1211	20	2.2877e-87	0.6335
2824	c2909_g1_i2	28s ribosomal protein mitochondrial-like	1305	20	2.67371e-111	0.629
6037	c6256_g1_i1	28s ribosomal protein mitochondrial-like	1147	20	5.59256e-69	0.7455
6038	c6256_g1_i2	28s ribosomal protein mitochondrial-like	1225	20	7.70162e-63	0.639
6660	c6966_g1_i1	28s ribosomal protein mitochondrial-like	677	20	2.99427e-29	0.7465
8001	c8326_g1_i1	28s ribosomal protein mitochondrial-like	1010	20	3.35494e-102	0.78
12224	c12621_g1_i1	28s ribosomal protein mitochondrial-like	1532	20	4.19892e-156	0.7295
12225	c12621_g1_i2	28s ribosomal protein mitochondrial-like	1682	20	2.31781e-155	0.7295
18316	c15809_g1_i1	28s ribosomal protein mitochondrial-like	1649	20	1.01172e-41	0.609
18326	c15809_g1_i2	28s ribosomal protein mitochondrial-like	1650	20	1.01172e-41	0.609
19936	c16282_g1_i1	28s ribosomal protein mitochondrial-like	1775	20	1.64178e-110	0.519
20562	c16912_g1_i1	28s ribosomal protein mitochondrial-like	1371	20	1.51298e-82	0.6615
29469	c26004_g1_i1	28s ribosomal protein mitochondrial-like	1049	20	1.48873e-78	0.701
35407	c32101_g1_i1	28s ribosomal protein mitochondrial-like	729	20	3.52872e-41	0.778
45406	c42252_g1_i1	28s ribosomal protein mitochondrial-like	1559	20	2.16242e-112	0.6935
51657	c48632_g1_i1	28s ribosomal protein mitochondrial-like	562	20	1.19967e-42	0.7735
52643	c49624_g1_i1	28s ribosomal protein mitochondrial-like	1177	20	1.22314e-104	0.658
52681	c49662_g1_i1	28s ribosomal protein mitochondrial-like	637	20	3.28732e-44	0.704
53975	c50966_g1_i1	28s ribosomal protein mitochondrial-like	478	19	1.94466e-11	0.5632
53686	c50672_g1_i1	2-acylglycerol o-acyltransferase 1	249	20	5.93996e-29	0.7855
63354	c60541_g1_i1	2-acylglycerol o-acyltransferase 1	708	20	8.47596e-33	0.685
35181	c31879_g1_i1	2-acylglycerol o-acyltransferase 2-like	220	2	5.50399e-06	0.735
28753	c25285_g1_i1	2-amino-3-carboxymuconate-6-semialdehyde decarboxylase	741	20	6.47804e-112	0.7895
62454	c59625_g1_i1	2-amino-3-carboxymuconate-6-semialdehyde decarboxylase	380	20	8.90766e-47	0.8425
20796	c17145_g1_i1	2-amino-3-ketobutyrate coenzyme a mitochondrial	554	20	3.91505e-43	0.81
60461	c57597_g1_i1	2-amino-3-ketobutyrate coenzyme a mitochondrial	1033	20	1.73513e-134	0.848
65241	c62473_g1_i1	2-aminoethanethiol dioxygenase	331	20	6.6725e-12	0.5405
53655	c50641_g1_i1	2-aminoethanethiol dioxygenase-like	497	20	1.9229e-24	0.507
13071	c13315_g1_i1	2-hydroxyacid dehydrogenase	2453	20	0	0.891
13072	c13315_g1_i2	2-hydroxyacid dehydrogenase	2434	20	0	0.891
13073	c13315_g1_i3	2-hydroxyacid dehydrogenase	2476	20	0	0.8645
5984	c6192_g1_i1	2-hydroxyacyl- lyase 1	519	20	1.76301e-22	0.8425
5985	c6192_g1_i2	2-hydroxyacyl- lyase 1	533	20	1.93336e-22	0.8455
43311	c40145_g1_i1	2-hydroxyacyl- lyase 1-like	421	20	3.74316e-53	0.72
25891	c22331_g1_i1	2-hydroxyacylsphingosine 1-beta-galactosyltransferase-like	344	20	8.72818e-29	0.6355
59830	c56961_g1_i1	2-hydroxyphytanoyl- lyase	941	20	2.17451e-127	0.755
59545	c56675_g1_i1	2-hydroxyphytanoyl-coa lyase	725	20	3.72588e-11	0.738
52548	c49528_g1_i1	2-methoxy-6-polyprenyl- -benzoquinol mitochondrial	781	20	2.90997e-97	0.707
38424	c35133_g1_i1	2og-fe oxygenase	292	20	1.17596e-25	0.6525
56704	c53762_g1_i1	2og-fe oxygenase	351	20	1.80306e-19	0.5645
63508	c60697_g1_i1	2-oxo-4-hydroxy-4-carboxy-5-ureidoimidazoline decarboxylase	744	20	2.3782e-69	0.6915
4601	c4840_g1_i1	2-oxoglutarate and iron-dependent oxygenase domain-containing protein 1	3278	20	3.26788e-136	0.5975
21360	c17719_g1_i1	2-oxoglutarate and iron-dependent oxygenase domain-containing protein 2	282	20	1.16916e-16	0.6285
24269	c20674_g1_i1	2-oxoglutarate and iron-dependent oxygenase domain-containing protein 2	407	20	1.39138e-43	0.7
39833	c36567_g1_i1	2-oxoglutarate and iron-dependent oxygenase domain-containing protein 2-like	926	20	5.69242e-36	0.7215
14308	c14220_g1_i1	2-oxoglutarate mitochondrial-like	4037	20	0	0.832
259	c247_g1_i1	2-oxoisovalerate dehydrogenase subunit mitochondrial-like	1857	20	8.85546e-179	0.869
35497	c32190_g1_i1	2-oxoisovalerate dehydrogenase subunit mitochondrial-like	1648	20	0	0.818
52119	c49097_g1_i1	3 (2 ) -bisphosphate nucleotidase 1-like	800	20	5.00805e-57	0.7205
21461	c17821_g1_i1	3 -5 exoribonuclease 1	606	20	2.24064e-65	0.74
9044	c9528_g1_i1	3 beta-hydroxysteroid dehydrogenase delta 5--	2403	20	5.46301e-32	0.4205
6432	c6702_g1_i2	39s ribosomal protein l13	959	20	1.21438e-76	0.802
2491	c2587_g1_i1	39s ribosomal protein mitochondrial	1261	20	1.65104e-52	0.7225
3212	c3267_g1_i1	39s ribosomal protein mitochondrial	1117	20	4.56409e-69	0.7665
10433	c10980_g1_i1	39s ribosomal protein mitochondrial	812	20	2.38075e-67	0.7295
11834	c12281_g1_i1	39s ribosomal protein mitochondrial	907	20	1.60641e-40	0.6555
12852	c13132_g1_i2	39s ribosomal protein mitochondrial	4299	20	2.05238e-44	0.666
21497	c17857_g1_i1	39s ribosomal protein mitochondrial	933	20	4.86172e-76	0.7095
31032	c27587_g1_i1	39s ribosomal protein mitochondrial	651	20	5.87073e-59	0.78
41431	c38196_g1_i1	39s ribosomal protein mitochondrial	535	20	2.32007e-35	0.7595
43578	c40412_g1_i1	39s ribosomal protein mitochondrial	1212	20	6.007e-112	0.7695
54919	c51924_g1_i1	39s ribosomal protein mitochondrial	1734	20	9.45144e-39	0.652
61218	c58365_g1_i1	39s ribosomal protein mitochondrial	224	20	3.06855e-13	0.7745
839	c857_g1_i1	39s ribosomal protein mitochondrial-like	718	20	6.57255e-26	0.6775
840	c857_g1_i2	39s ribosomal protein mitochondrial-like	834	20	1.4716e-25	0.6775
2434	c2521_g1_i1	39s ribosomal protein mitochondrial-like	366	20	5.99e-20	0.678
2435	c2521_g1_i2	39s ribosomal protein mitochondrial-like	433	20	2.0242e-19	0.678
3367	c3434_g1_i1	39s ribosomal protein mitochondrial-like	769	20	8.5699e-16	0.7995
5862	c6082_g1_i1	39s ribosomal protein mitochondrial-like	1226	20	1.16624e-36	0.648
6431	c6702_g1_i1	39s ribosomal protein mitochondrial-like	804	20	5.4043e-16	0.746
6699	c7006_g1_i1	39s ribosomal protein mitochondrial-like	1385	20	8.38923e-120	0.6715
7842	c8167_g1_i1	39s ribosomal protein mitochondrial-like	528	20	5.85649e-27	0.6995
7857	c8185_g1_i1	39s ribosomal protein mitochondrial-like	386	20	2.433e-15	0.835
8908	c9392_g1_i1	39s ribosomal protein mitochondrial-like	743	20	1.00269e-46	0.663
13102	c13334_g1_i1	39s ribosomal protein mitochondrial-like	696	20	1.02695e-19	0.606
13846	c13909_g1_i1	39s ribosomal protein mitochondrial-like	1336	20	6.02301e-82	0.604
19308	c15953_g3_i1	39s ribosomal protein mitochondrial-like	1388	20	1.30688e-31	0.6995
20290	c16636_g1_i1	39s ribosomal protein mitochondrial-like	1709	20	1.60134e-103	0.7485
21169	c17524_g1_i1	39s ribosomal protein mitochondrial-like	762	20	2.24508e-10	0.717
22540	c18918_g1_i1	39s ribosomal protein mitochondrial-like	1043	20	6.54293e-68	0.5955
31542	c28104_g1_i1	39s ribosomal protein mitochondrial-like	469	20	2.28216e-22	0.659
32421	c29005_g1_i1	39s ribosomal protein mitochondrial-like	1127	20	3.41509e-69	0.654
35250	c31947_g1_i1	39s ribosomal protein mitochondrial-like	1163	20	2.0705e-41	0.6795
51798	c48771_g1_i1	39s ribosomal protein mitochondrial-like	868	20	3.8364e-69	0.7265
53491	c50477_g1_i1	39s ribosomal protein mitochondrial-like	1465	20	2.98815e-109	0.7375
54547	c51544_g1_i1	39s ribosomal protein mitochondrial-like	1443	20	3.91493e-36	0.5465
54988	c51997_g1_i1	39s ribosomal protein mitochondrial-like	1449	20	3.55377e-108	0.6985
55630	c52656_g1_i1	39s ribosomal protein mitochondrial-like	304	20	3.93104e-35	0.7965
61005	c58150_g1_i1	39s ribosomal protein mitochondrial-like	612	20	2.69195e-28	0.694
43262	c40096_g1_i1	3-deoxy-7-phosphoheptulonate synthase	332	1	7.69292e-14	0.75
5248	c5493_g2_i1	3-hydroxy-3-methylglutaryl-coenzyme a reductase	3016	20	0	0.702
9120	c9609_g1_i1	3-hydroxyanthranilate -dioxygenase	1375	20	9.57939e-107	0.6965
31676	c28239_g1_i1	3-hydroxyisobutyrate dehydrogenase	245	20	7.23748e-12	0.744
65954	c63210_g1_i1	3-hydroxyisobutyrate dehydrogenase	202	20	2.97011e-32	0.9155
58769	c55898_g1_i1	3-hydroxyisobutyrate mitochondrial-like	1790	20	2.46817e-130	0.8145
3056	c3125_g1_i1	3-hydroxyisobutyryl- mitochondrial-like	1352	20	1.33031e-144	0.729
13879	c13927_g1_i1	3-ketoacyl- mitochondrial	1701	20	0	0.813
10976	c11456_g1_i1	3-ketodihydrosphingosine reductase	1332	20	3.82761e-84	0.687
10752	c11252_g2_i1	3-methyl-2-oxobutanoate dehydrogenase	2316	20	2.49241e-161	0.749
52160	c49138_g1_i1	3-oxoacyl-	288	20	1.80569e-31	0.7005
62911	c60088_g1_i1	3-oxoacyl-	224	20	2.74517e-12	0.725
5324	c5565_g1_i1	3-oxoacyl-acyl-carrier-protein reductase	834	20	1.88531e-96	0.7335
5325	c5565_g1_i2	3-oxoacyl-acyl-carrier-protein reductase	1009	20	1.45735e-95	0.7335
15484	c14908_g1_i1	3-phosphoinositide-dependent protein kinase 1-like	3238	20	0	0.6725
15485	c14908_g1_i2	3-phosphoinositide-dependent protein kinase 1-like	3160	20	7.0542e-167	0.6335
5586	c5820_g1_i1	40s ribosomal protein mitochondrial-like isoform x2	1261	20	6.90883e-52	0.856
2734	c2817_g1_i1	40s ribosomal protein s11	533	20	1.38473e-95	0.868
44097	c40931_g1_i1	40s ribosomal protein s13	572	20	6.17906e-92	0.9385
35578	c32272_g1_i1	40s ribosomal protein s15	530	20	1.35554e-60	0.8995
7652	c7961_g1_i1	40s ribosomal protein s15a	468	20	1.49821e-84	0.952
59908	c57039_g1_i1	40s ribosomal protein s16-like protein	559	20	4.35165e-84	0.9165
43127	c39962_g1_i1	40s ribosomal protein s17-like	477	20	5.33181e-73	0.9475
19868	c16214_g1_i1	40s ribosomal protein s19a-like	556	20	7.71557e-102	0.842
51054	c48029_g1_i1	40s ribosomal protein s20	553	20	4.78927e-63	0.951
51137	c48112_g1_i1	40s ribosomal protein s21-like protein	343	20	2.2266e-49	0.8965
28218	c24745_g1_i1	40s ribosomal protein s23-like	510	20	8.35253e-95	0.972
1827	c1927_g1_i1	40s ribosomal protein s24-like isoform x3	492	20	8.83512e-59	0.889
9464	c9977_g1_i1	40s ribosomal protein s26	443	20	2.46031e-55	0.877
9465	c9977_g1_i2	40s ribosomal protein s26	506	20	4.43591e-55	0.881
52949	c49931_g1_i1	40s ribosomal protein s27-like	459	20	1.34572e-52	0.9435
60161	c57296_g1_i1	40s ribosomal protein s28	367	20	1.73302e-26	0.937
3786	c3939_g1_i1	40s ribosomal protein s29-like	354	20	1.88942e-25	0.878
21051	c17404_g1_i1	40s ribosomal protein s3a	876	20	6.24849e-161	0.8575
21313	c17671_g1_i1	40s ribosomal protein s7	651	20	6.19099e-130	0.8465
2807	c2889_g1_i1	40s ribosomal protein sa	978	20	3.28454e-129	0.8855
20722	c17072_g1_i1	40s ribosomal protein sa-like	221	20	7.09584e-44	0.967
45944	c42803_g1_i1	45 kda calcium-binding protein	266	20	8.04142e-31	0.73
6185	c6437_g1_i1	45 kda immunophilin fkbp45	647	20	1.45553e-26	0.603
57123	c54192_g1_i1	4930453n24rik protein	312	20	1.23103e-10	0.5905
33425	c30043_g1_i1	4-aminobutyrate aminotransferase and related aminotransferase	222	20	4.89474e-23	0.714
6750	c7060_g1_i2	4-aminobutyrate mitochondrial	1703	20	0	0.7585
6749	c7060_g1_i1	4-aminobutyrate mitochondrial-like	1721	20	0	0.759
6316	c6597_g1_i1	4-coumarate-- ligase	1969	20	2.85954e-170	0.6465
13686	c13788_g1_i1	4-hydroxybenzoate mitochondrial-like	641	20	1.85568e-33	0.7815
35863	c32560_g1_i1	4-hydroxybenzoate mitochondrial-like	963	20	3.34436e-72	0.768
32944	c29543_g1_i1	4-hydroxybutyrate coenzyme a transferase	573	20	1.85744e-89	0.853
59957	c57090_g1_i1	4-hydroxybutyrate coenzyme a transferase-like	617	20	9.86987e-96	0.793
20128	c16473_g1_i1	4-hydroxyphenylpyruvate dioxygenase	995	20	0	0.8585
5292	c5537_g1_i1	4-hydroxyphenylpyruvate dioxygenase-like	1672	20	4.46173e-70	0.5085
58462	c55574_g1_i1	4-hydroxyphenylpyruvate dioxygenase-like	233	20	1.43313e-17	0.801
2410	c2494_g1_i1	4-trimethylaminobutyraldehyde dehydrogenase	325	20	1.55632e-50	0.793
43764	c40597_g1_i1	4-trimethylaminobutyraldehyde dehydrogenase	664	20	1.65012e-89	0.7415
30010	c26550_g1_i1	5 -3 exoribonuclease 1	783	20	3.5923e-144	0.8535
44482	c41319_g1_i1	5 -3 exoribonuclease 1	1809	20	1.01506e-22	0.809
65329	c62562_g1_i1	5 -3 exoribonuclease 1	255	20	5.80399e-21	0.963
28304	c24833_g1_i1	5 -3 exoribonuclease 1 isoform x2	1410	20	9.37001e-108	0.5865
56719	c53777_g1_i1	5 -3 exoribonuclease 1-like	685	20	2.68588e-81	0.752
11039	c11517_g1_i1	5 -3 exoribonuclease 2 homolog	3585	20	0	0.735
44233	c41069_g1_i1	5 -amp-activated protein kinase catalytic subunit alpha-2-like	1861	20	0	0.794
258	c246_g1_i1	5 -amp-activated protein kinase subunit beta-1-like	1341	20	4.14894e-88	0.6415
28913	c25445_g1_i1	5 exonuclease apollo	231	20	1.08057e-18	0.7005
34897	c31569_g1_i1	5 exonuclease apollo	250	20	4.28639e-23	0.7145
21814	c18178_g1_i1	5 -nucleotidase domain-containing protein 3-like	275	20	5.25334e-23	0.667
21991	c18358_g1_i1	50s ribosomal protein l1	1156	20	3.45173e-65	0.609
28371	c24900_g1_i1	50s ribosomal protein l19	543	20	3.53609e-13	0.53
52691	c49672_g1_i1	52 kda repressor of the inhibitor of the protein kinase-like	418	2	1.87991e-08	0.52
14419	c14290_g1_i1	5-aminolevulinate erythroid- mitochondrial-like	2400	20	0	0.7595
14420	c14290_g1_i2	5-aminolevulinate erythroid- mitochondrial-like	2513	20	0	0.729
14421	c14290_g1_i3	5-aminolevulinate erythroid- mitochondrial-like	2487	20	0	0.7295
48361	c45259_g1_i1	5-formyltetrahydrofolate cyclo-ligase	213	20	3.69585e-17	0.754
55556	c52581_g1_i1	5-formyltetrahydrofolate cyclo-ligase	480	20	4.39619e-38	0.699
25716	c22150_g1_i1	5-hydroxytryptamine receptor 1	479	20	1.29403e-57	0.8125
45654	c42504_g1_i1	5-methylcytosine rrna methyltransferase nsun4-like	203	20	6.36803e-10	0.6475
29509	c26044_g1_i1	60 kda ss-a ro ribonucleoprotein	806	8	8.09972e-29	0.6313
35305	c32001_g1_i1	60s acidic ribosomal protein p0	938	20	7.60373e-141	0.845
43520	c40354_g2_i1	60s acidic ribosomal protein p1	528	20	3.76325e-25	0.8395
13839	c13905_g2_i1	60s acidic ribosomal protein p2	461	20	6.10608e-21	0.7215
31496	c28060_g1_i1	60s ribosomal export protein nmd3	349	20	6.47505e-35	0.751
36180	c32874_g1_i1	60s ribosomal export protein nmd3	907	20	3.79193e-80	0.6705
39832	c36566_g1_i1	60s ribosomal export protein nmd3-like	214	20	3.77697e-30	0.852
52121	c49099_g1_i1	60s ribosomal protein l13	724	20	3.33342e-103	0.776
4558	c4794_g1_i1	60s ribosomal protein l13a	715	20	5.02898e-121	0.805
51930	c48905_g1_i1	60s ribosomal protein l14	674	20	3.04326e-41	0.696
36891	c33589_g1_i1	60s ribosomal protein l18a-like	615	20	1.45671e-73	0.7765
51163	c48138_g1_i1	60s ribosomal protein l21	592	20	4.64081e-64	0.82
36796	c33492_g1_i1	60s ribosomal protein l22	617	20	3.98778e-37	0.7865
28956	c25489_g1_i1	60s ribosomal protein l23	480	20	1.57318e-86	0.9455
820	c836_g1_i1	60s ribosomal protein l23a	969	20	1.06624e-60	0.8695
50868	c47844_g1_i1	60s ribosomal protein l27	572	20	2.26311e-58	0.796
27743	c24264_g1_i1	60s ribosomal protein l27a-like	624	20	9.41195e-59	0.8615
60335	c57473_g1_i1	60s ribosomal protein l29	369	20	8.01485e-20	0.919
58745	c55874_g1_i1	60s ribosomal protein l31	504	20	9.85958e-58	0.8595
50881	c47857_g1_i1	60s ribosomal protein l34-like	448	20	2.25606e-40	0.8005
3414	c3491_g1_i1	60s ribosomal protein l36	433	20	2.09041e-62	0.871
53533	c50519_g1_i1	60s ribosomal protein l37a-like	395	20	2.2902e-42	0.857
23097	c19480_g1_i1	60s ribosomal protein l38	340	20	5.59601e-36	0.9335
51147	c48122_g1_i1	60s ribosomal protein l5	1029	20	1.81442e-134	0.8175
43545	c40379_g1_i1	60s ribosomal protein l6	834	20	5.91587e-74	0.7385
10030	c10595_g1_i1	60s ribosomal protein l7 l12	875	20	1.05924e-41	0.697
11530	c11976_g1_i1	60s ribosomal protein l7a	954	20	1.10258e-101	0.8515
35498	c32191_g1_i1	60s ribosomal protein l8	883	20	7.63533e-167	0.9155
19797	c16143_g1_i1	60s ribosomal protein l9	665	20	5.77141e-122	0.817
8479	c8884_g1_i1	60s ribosome subunit biogenesis protein nip7 homolog	917	20	3.61839e-85	0.772
37917	c34625_g1_i1	6-phosphofructo-2-kinase fructose- -biphosphatase 1	305	20	1.21833e-39	0.789
15764	c15046_g2_i1	6-phosphofructo-2-kinase fructose- -bisphosphatase short form	4889	20	0	0.825
61499	c58651_g1_i1	6-phosphofructo-2-kinase fructose- -bisphosphatase short form	450	20	1.08842e-80	0.845
14861	c14570_g1_i1	6-phosphofructokinase-like isoform x1	5569	20	0	0.7975
14862	c14570_g1_i2	6-phosphofructokinase-like isoform x1	5410	20	0	0.848
14863	c14570_g1_i3	6-phosphofructokinase-like isoform x1	5700	20	0	0.8355
14864	c14570_g1_i4	6-phosphofructokinase-like isoform x1	5455	20	0	0.8355
14865	c14570_g1_i5	6-phosphofructokinase-like isoform x1	5503	20	0	0.8355
1898	c1993_g1_i1	6-phosphogluconate decarboxylating	2477	20	0	0.8725
36532	c33228_g1_i1	6-phosphogluconolactonase-like	1355	20	2.0848e-88	0.6845
44534	c41370_g1_i1	6-pyruvoyl tetrahydrobiopterin synthase	538	20	7.53424e-57	0.8025
7885	c8215_g1_i1	70 kda heat shock partial	314	20	1.22237e-60	0.947
19460	c15973_g3_i2	71 kda protein	2019	20	5.27665e-50	0.479
27936	c24459_g1_i1	72 kda inositol polyphosphate 5-phosphatase	306	20	1.39037e-26	0.677
52448	c49429_g1_i1	7sk snrna methylphosphate capping enzyme	639	20	2.1946e-14	0.6
57365	c54443_g1_i1	7sk snrna methylphosphate capping enzyme	521	20	4.55135e-66	0.702
53796	c50783_g1_i1	7sk snrna methylphosphate capping enzyme-like	643	20	8.51442e-22	0.691
49241	c46158_g1_i1	80 kda mcm3-associated protein	232	20	4.91853e-20	0.725
59760	c56891_g1_i1	85 88 kda calcium-independent phospholipase a2	379	20	1.05245e-39	0.7305
43108	c39943_g1_i1	85 88 kda calcium-independent phospholipase a2 isoform x1	330	20	2.3514e-12	0.634
33067	c29671_g1_i1	85 kda calcium-independent phospholipase a2	239	20	7.36367e-14	0.6145
47103	c43981_g1_i1	85 kda calcium-independent phospholipase a2	348	10	2.03497e-09	0.584
63030	c60208_g1_i1	85 kda calcium-independent phospholipase a2	410	20	1.86215e-31	0.6185
50256	c47203_g1_i1	85 kda calcium-independent phospholipase a2-like	342	20	4.88057e-24	0.608
61540	c58695_g1_i1	85 kda calcium-independent phospholipase a2-like	225	20	6.38059e-29	0.8325
46037	c42897_g1_i1	8-oxo-dgdp phosphatase nudt18-like	272	20	1.55518e-35	0.71
13025	c13273_g1_i1	a chain crystal structure of arylalkylamine n-acetyltransferase 2 from aedes aegypti	821	5	1.77191e-07	0.514
61426	c58578_g1_i1	a chain crystal structure of bace-1 in complex with 5-cyano-pyridine-2- carboxylic acid	1040	20	2.27298e-61	0.534
44747	c41586_g1_i1	a chain human tankyrase 2 - catalytic parp domain in complex with an inhibitor	542	20	1.62972e-106	0.9045
23109	c19492_g1_i1	a chain protein tyrosine phosphatase 1b with sulfamic acid inhibitors	248	20	1.45731e-27	0.7335
35345	c32040_g1_i1	a chain structural studies of protein tyrosine phosphatase beta catalytic domain in complex with inhibitors	1680	20	2.01027e-12	0.586
43162	c39995_g1_i1	a disintegrin and metalloproteinase with thrombospondin motifs 18-like	596	20	8.3241e-41	0.5955
42631	c39451_g1_i1	a disintegrin and metalloproteinase with thrombospondin motifs 1-like	278	20	2.70818e-10	0.536
12144	c12553_g1_i1	a disintegrin and metalloproteinase with thrombospondin motifs 3	4703	20	0	0.566
1525	c1645_g1_i1	a disintegrin and metalloproteinase with thrombospondin motifs 7-like	460	20	1.06207e-20	0.492
6390	c6661_g1_i1	a disintegrin and metalloproteinase with thrombospondin motifs 7-like	3330	20	0	0.623
19945	c16291_g1_i1	a disintegrin and metalloproteinase with thrombospondin motifs 7-like	600	20	9.90382e-91	0.761
20220	c16565_g1_i1	a disintegrin and metalloproteinase with thrombospondin motifs 9	292	20	2.24461e-14	0.621
32768	c29363_g1_i1	a disintegrin and metalloproteinase with thrombospondin motifs 9	455	20	5.315e-54	0.6615
28919	c25451_g1_i1	a disintegrin and metalloproteinase with thrombospondin motifs 9-like	970	20	1.08519e-124	0.6695
36373	c33069_g1_i1	a disintegrin and metalloproteinase with thrombospondin motifs 9-like	248	18	4.87241e-15	0.5722
61259	c58406_g1_i1	a disintegrin and metalloproteinase with thrombospondin motifs 9-like	652	20	2.18281e-52	0.61
37342	c34045_g1_i1	a disintegrin and metalloproteinase with thrombospondin motifs partial	548	20	3.05805e-19	0.501
53417	c50400_g1_i1	a g-specific adenine dna glycosylase-like	421	20	1.04082e-40	0.78
29748	c26284_g1_i1	a g-specific adenine dna partial	465	20	1.23077e-24	0.574
64179	c61382_g1_i1	a2 protein	330	20	3.71331e-19	0.5655
46360	c43222_g1_i1	aaa family atpase 60s ribosome export protein	569	20	4.82007e-36	0.545
22378	c18753_g1_i1	aael001060- partial	505	16	4.11675e-11	0.6788
31585	c28148_g1_i1	aael001060- partial	876	20	2.05511e-76	0.703
14011	c14017_g1_i1	aael002100- partial	1442	20	1.2446e-74	0.664
14012	c14017_g1_i2	aael002100- partial	999	20	2.38725e-73	0.67
14499	c14350_g1_i1	aael002251- partial	5706	20	3.03275e-118	0.6755
14500	c14350_g1_i2	aael002251- partial	5766	20	5.89402e-118	0.686
20643	c16993_g1_i1	aael003267- partial	1082	20	1.98486e-116	0.585
55755	c52784_g1_i1	aael003425- partial	422	20	1.95419e-81	0.7195
22325	c18700_g1_i1	aael004946- partial	1642	20	1.26459e-102	0.7905
21385	c17745_g1_i1	aael005189- partial	2478	20	0	0.6105
61361	c58512_g1_i1	aael005315- partial	1009	20	7.5104e-57	0.6965
58872	c56001_g1_i1	aael005317- partial	1018	20	3.27e-93	0.581
7223	c7557_g1_i1	aael005685- partial	1478	20	0	0.7655
29731	c26267_g1_i1	aael007804- partial	809	20	1.9083e-88	0.635
36041	c32736_g1_i1	aael007847- partial	272	2	5.39872e-06	0.555
17297	c15606_g1_i1	aael008062- partial	4549	20	0	0.6835
47233	c44112_g1_i1	aael008845- partial	937	20	3.02434e-82	0.645
60978	c58122_g1_i1	aael008845- partial	899	20	5.39641e-114	0.7205
39484	c36210_g1_i1	aael009135- partial	321	1	5.39084e-06	0.53
6496	c6784_g1_i1	aael010198- partial	2859	17	8.93274e-14	0.4765
6497	c6784_g1_i2	aael010198- partial	3719	17	1.33082e-13	0.4765
23534	c19925_g1_i1	aael010828- partial	569	20	1.92766e-46	0.661
8212	c8531_g1_i3	aael011377- partial	485	20	1.09828e-32	0.747
2064	c2141_g1_i1	aael011417- partial	847	20	1.11705e-98	0.755
22102	c18472_g1_i1	aael012145- partial	773	20	7.95699e-73	0.6345
38656	c35366_g1_i1	aael012335- partial	248	20	6.43845e-27	0.801
42616	c39436_g1_i1	aael012861- partial	260	20	7.01858e-23	0.816
43084	c39920_g1_i1	aael013792- partial	1427	1	6.52988e-06	0.75
66328	c63595_g1_i1	aael014290- partial	238	20	1.0887e-16	0.6265
59697	c56828_g1_i1	aael014436- partial	287	20	3.84624e-08	0.55
3533	c3641_g1_i1	aael014486- partial	3125	20	1.02076e-54	0.554
12457	c12812_g1_i1	AAEL017164-PA	661	1	3.79755e-06	0.5
23340	c19727_g1_i1	a-agglutinin anchorage subunit-like isoform x1	695	7	2.69555e-16	0.56
31958	c28528_g1_i1	a-agglutinin anchorage subunit-like isoform x1	760	1	9.01828e-07	0.6
5935	c6149_g1_i1	aatf protein	624	20	3.53561e-39	0.569
26396	c22858_g1_i1	abc multidrug	224	20	1.69609e-18	0.732
46819	c43693_g1_i1	abc subfamily abca	263	8	5.1788e-09	0.5963
22724	c19104_g1_i1	abc subfamily abcc	348	20	4.67052e-30	0.723
40660	c37408_g1_i1	abc subfamily abcd	635	3	1.10268e-09	0.65
24780	c21194_g1_i1	abc transporter	762	20	1.24741e-96	0.7765
35092	c31779_g1_i1	abc transporter	232	18	1.15578e-09	0.65
40300	c37041_g1_i1	abc transporter	509	20	1.64157e-10	0.5815
44206	c41042_g1_i1	abc transporter	284	20	1.38142e-19	0.6175
58985	c56115_g1_i1	abc transporter	773	20	7.97201e-36	0.8645
63276	c60463_g1_i1	abc transporter	374	20	6.94068e-47	0.797
41584	c38353_g1_i1	abc transporter g family member 22-like	212	20	2.24035e-30	0.86
28930	c25463_g1_i1	abc1 family protein	217	20	3.61493e-16	0.8195
13582	c13700_g1_i2	abdominal a	4862	20	1.49308e-66	0.6745
31865	c28433_g1_i1	abhydrolase domain containing 11	811	20	1.8584e-39	0.6105
40124	c36863_g1_i1	abhydrolase domain containing 11	227	2	5.78644e-07	0.58
53076	c50058_g1_i1	abhydrolase domain-containing protein	202	20	1.50109e-15	0.7105
9441	c9955_g1_i1	abhydrolase domain-containing protein 14a	1148	20	3.13125e-46	0.596
9442	c9955_g1_i2	abhydrolase domain-containing protein 14a	1313	20	5.38646e-46	0.596
1273	c1353_g1_i1	abhydrolase domain-containing protein 16a	1496	20	2.9606e-143	0.6465
51456	c48430_g1_i1	abhydrolase domain-containing protein 16a-like	388	18	2.92329e-09	0.5789
10238	c10769_g1_i1	abhydrolase domain-containing protein 3-like	1820	20	6.8834e-144	0.688
13339	c13512_g1_i1	abhydrolase domain-containing protein 3-like	3725	20	9.30756e-124	0.6715
59606	c56736_g1_i1	abhydrolase domain-containing protein 4-like	1594	20	3.57614e-141	0.7165
53538	c50523_g1_i1	abhydrolase domain-containing protein 8-like	226	20	3.39824e-18	0.6615
51203	c48178_g1_i1	abhydrolase domain-containing protein fam108c1-like	2332	20	5.86213e-173	0.903
11796	c12251_g1_i1	abl interactor 2	1565	20	3.22441e-85	0.686
11797	c12251_g1_i2	abl interactor 2	1601	20	2.83349e-76	0.817
11798	c12251_g1_i3	abl interactor 2	1691	20	4.80179e-76	0.8175
4098	c4294_g1_i2	abrupt protein	756	20	1.06649e-38	0.7385
4417	c4637_g1_i1	ac transposable element-derived protein 4	245	5	1.22007e-07	0.594
6273	c6553_g1_i1	ac transposable element-derived protein 4	229	5	1.06894e-08	0.536
18881	c15903_g1_i1	ac transposable element-derived protein 4	1507	19	2.4287e-12	0.6089
19279	c15951_g3_i1	ac transposable element-derived protein 4	1060	20	6.14113e-58	0.563
19282	c15951_g2_i3	ac transposable element-derived protein 4	426	20	5.37596e-16	0.635
19284	c15951_g2_i4	ac transposable element-derived protein 4	358	20	2.35569e-16	0.618
19609	c15998_g1_i2	ac transposable element-derived protein 4	2322	20	1.03511e-100	0.578
21109	c17463_g1_i1	ac transposable element-derived protein 4	254	2	1.87242e-06	0.61
27564	c24084_g1_i1	ac1147-like partial	2898	20	6.05566e-57	0.7685
35463	c32156_g1_i1	accessory gland protein	534	20	4.25419e-24	0.628
63808	c61000_g1_i1	accessory gland protein	353	20	7.09109e-11	0.6235
20295	c16641_g1_i1	ace-orthologous acetylcholinesterase	1694	20	9.83191e-132	0.739
31647	c28210_g1_i1	ace-orthologous acetylcholinesterase	341	20	1.54376e-46	0.8105
37191	c33890_g1_i1	ace-orthologous acetylcholinesterase	650	20	4.38121e-32	0.7295
17302	c15608_g2_i1	ace-paralogous acetylcholinesterase	4397	20	0	0.8115
5513	c5745_g1_i1	acetoacetyl- synthetase	2696	20	0	0.764
7901	c8228_g1_i1	acetolactate synthase-like	2031	20	0	0.798
17634	c15687_g1_i3	acetyl- carboxylase 1-like isoform x3	3575	20	0	0.7955
16114	c15203_g2_i1	acetyl- mitochondrial	1675	20	0	0.813
39204	c35925_g1_i1	acetylcholine receptor protein alpha 4	320	20	1.66256e-64	0.949
43239	c40073_g1_i1	acetylcholine receptor protein alpha 4 invertebrate	325	20	9.44811e-52	0.956
24687	c21099_g1_i1	acetylcholine receptor subunit alpha-like	279	20	2.46081e-29	0.852
50840	c47816_g1_i1	acetylcholine receptor subunit alpha-like 1-like	361	20	1.04546e-30	0.7355
36573	c33269_g1_i1	acetylcholine receptor subunit beta-like 2-like	665	20	4.32565e-120	0.9155
17632	c15687_g1_i1	acetyl-coa carboxylase	7945	20	0	0.7805
17633	c15687_g1_i2	acetyl-coa carboxylase	7929	20	0	0.781
29657	c26192_g1_i1	acetyl-coenzyme a cytoplasmic isoform 3	1861	20	0	0.795
63155	c60339_g1_i1	acetyl-coenzyme a synthetase 2- mitochondrial	205	20	1.29246e-34	0.891
36770	c33466_g1_i1	acetyl-coenzyme a synthetase-like	370	20	8.09908e-35	0.727
5212	c5468_g1_i1	acetyl-coenzyme a transporter 1	509	20	6.10096e-38	0.7725
5213	c5468_g1_i2	acetyl-coenzyme a transporter 1	489	20	3.80983e-38	0.7745
26900	c23382_g1_i1	acetyl-coenzyme a transporter 1	213	20	1.1479e-19	0.64
45308	c42153_g1_i1	acetyl-coenzyme a transporter 1-like	1149	20	1.06842e-16	0.6115
58906	c56035_g1_i1	acetyl-coenzyme a transporter 1-like	610	20	3.47584e-80	0.7625
21706	c18067_g1_i1	achain a six finger zinc finger designed to recognize ann triplets	695	20	9.98057e-33	0.6125
28588	c25120_g1_i1	achain a six finger zinc finger designed to recognize ann triplets	385	20	1.91755e-40	0.6835
27979	c24502_g1_i1	achain crystal structure of a hairpin exchange variant of the targeting line-1 retrotransposon endonuclease	579	20	1.79291e-09	0.47
2860	c2939_g1_i1	achain crystal structure of engineered northeast structural genomics consortium target	3570	20	3.76287e-17	0.5715
29766	c26303_g1_i1	achain crystal structure of engineered northeast structural genomics consortium target	321	20	3.76423e-24	0.6475
16910	c15515_g1_i1	achain esterase domain of the zfl2-1 orf1 protein from the zebrafish zfl2-1 retrotransposon	332	8	2.17665e-15	0.5375
16911	c15515_g1_i2	achain esterase domain of the zfl2-1 orf1 protein from the zebrafish zfl2-1 retrotransposon	342	5	1.09319e-10	0.548
18309	c15808_g1_i1	achain esterase domain of the zfl2-1 orf1 protein from the zebrafish zfl2-1 retrotransposon	557	4	2.73965e-10	0.49
18311	c15808_g1_i2	achain esterase domain of the zfl2-1 orf1 protein from the zebrafish zfl2-1 retrotransposon	541	5	1.88018e-10	0.472
18314	c15808_g1_i3	achain esterase domain of the zfl2-1 orf1 protein from the zebrafish zfl2-1 retrotransposon	617	4	3.48298e-10	0.49
7198	c7538_g1_i1	achain structural determinants for improved thermal stability of designed ankyrin repeat proteins with a redesigned c- capping	1081	20	1.47141e-09	0.514
15518	c14926_g1_i1	acid ceramidase-like	2255	20	3.93657e-128	0.6755
28130	c24656_g1_i1	acid ceramidase-like	754	20	2.23411e-71	0.7055
59997	c57131_g1_i1	acid ceramidase-like	567	20	1.75701e-52	0.667
17318	c15611_g11_i1	acid phosphatase isoenzyme	682	20	7.23117e-61	0.7045
17319	c15611_g11_i2	acid phosphatase isoenzyme	654	20	5.29606e-61	0.7045
44373	c41210_g1_i1	acid phosphatase-like protein 2-like	788	20	4.31106e-56	0.559
51768	c48740_g1_i1	acid phosphatase-like protein 2-like	794	20	1.14781e-37	0.574
51164	c48139_g1_i1	acid sphingomyelinase-like phosphodiesterase 3b	2111	20	1.24921e-114	0.513
58498	c55610_g1_i1	acidic fibroblast growth factor intracellular binding protein	220	20	2.86926e-19	0.711
50392	c47341_g1_i1	acidic fibroblast growth factor intracellular-binding	293	20	1.16613e-38	0.8225
783	c791_g1_i1	acidic leucine-rich nuclear phosphoprotein 32 family member b	252	6	7.6001e-16	0.7217
784	c791_g1_i2	acidic leucine-rich nuclear phosphoprotein 32 family member b	252	6	1.68498e-13	0.725
25045	c21462_g1_i1	acidic leucine-rich nuclear phosphoprotein 32 family member b	282	7	1.2102e-16	0.6557
25930	c22372_g1_i1	acidic leucine-rich nuclear phosphoprotein 32 family member b	340	4	1.40794e-09	0.6775
37187	c33886_g1_i1	acidic leucine-rich nuclear phosphoprotein 32 family member b	286	5	3.75088e-08	0.664
60048	c57182_g1_i1	acidic leucine-rich nuclear phosphoprotein 32 family member b	270	5	9.40258e-08	0.616
32533	c29119_g1_i1	acidic mammalian chitinase-like	206	20	2.38593e-11	0.733
38275	c34986_g1_i1	acidic mammalian chitinase-like	1557	20	6.50045e-86	0.5595
38781	c35493_g1_i1	acid-sensitive two pore domain k+ channel dtask-	317	20	4.38462e-20	0.6535
7981	c8305_g1_i1	ac-like transposase	691	20	1.3736e-46	0.5965
28640	c25172_g1_i1	aconitate mitochondrial-like	3163	20	0	0.873
27788	c24309_g1_i1	actin	1418	20	0	0.992
6386	c6656_g1_i1	actin binding protein	2625	20	4.48505e-62	0.7415
17152	c15572_g1_i1	actin family protein	5613	20	1.81687e-139	0.562
17153	c15572_g1_i2	actin family protein	5568	20	1.53304e-138	0.568
17154	c15572_g1_i3	actin family protein	5408	20	1.09879e-138	0.568
49699	c46622_g1_i1	actin interacting protein 2	251	20	1.5112e-29	0.797
14887	c14582_g1_i1	actin-binding lim protein 1-like	4859	20	0	0.6715
14888	c14582_g1_i2	actin-binding lim protein 1-like	4900	20	0	0.672
34465	c31116_g1_i1	actin-binding protein anillin-like isoform x3	204	9	2.57883e-10	0.7689
2660	c2753_g1_i1	actin-binding protein ipp	743	20	9.2609e-33	0.577
2661	c2753_g1_i2	actin-binding protein ipp	814	20	1.47022e-24	0.632
48344	c45242_g1_i1	actin-binding protein ipp	373	20	6.33837e-40	0.777
34958	c31635_g1_i1	actin-binding protein ipp-like	347	20	3.12772e-32	0.673
60006	c57140_g1_i1	actin-binding protein ipp-like	607	20	1.15625e-77	0.7465
35600	c32295_g1_i1	actin-depolymerizing factor 1	1350	20	1.72239e-60	0.796
46159	c43019_g1_i1	actin-depolymerizing factor 1	1659	20	1.59825e-49	0.769
52089	c49067_g1_i1	actin-like protein 6b	2297	20	0	0.7705
201	c197_g1_i1	actin-related protein 10	2151	20	3.70947e-128	0.6695
35374	c32068_g1_i1	actin-related protein 2 3 complex subunit 3-like	1192	20	1.31718e-83	0.7825
1555	c1672_g1_i1	actin-related protein 2 3 complex subunit 4-like	2505	20	2.48449e-93	0.9335
12593	c12942_g1_i1	actin-related protein 2 isoform x1	3232	20	0	0.911
12594	c12942_g1_i2	actin-related protein 2 isoform x2	3214	20	0	0.928
7197	c7537_g1_i1	actin-related protein 3-like isoform x1	1705	20	0	0.9045
36091	c32786_g1_i1	actin-related protein 5-like	1506	20	3.73329e-103	0.6445
43669	c40503_g1_i1	actin-related protein 5-like	644	20	4.47999e-83	0.714
58110	c55212_g1_i1	actin-related protein 6	314	20	7.79481e-48	0.807
19450	c15971_g5_i1	actin-related protein 8-like	394	20	1.6463e-48	0.819
45362	c42208_g1_i1	actin-related protein 8-like	259	20	9.00145e-36	0.788
59083	c56213_g1_i1	actin-related protein 8-like	807	20	4.45962e-53	0.681
25919	c22361_g1_i1	activated cdc42 kinase 1	213	20	1.78341e-15	0.683
30562	c27107_g1_i1	activated cdc42 kinase 1	1045	20	1.32313e-37	0.6735
11187	c11651_g1_i1	activating molecule in becn1-regulated autophagy protein 1	5659	20	2.02691e-79	0.713
22622	c19001_g1_i1	activating signal cointegrator 1	396	20	2.11061e-50	0.792
40657	c37405_g1_i1	activating signal cointegrator 1	599	20	9.11031e-61	0.736
30369	c26913_g1_i1	activating signal cointegrator 1 complex subunit 1	804	20	1.60876e-59	0.6125
2297	c2386_g1_i1	activating signal cointegrator 1 complex subunit 1-like	948	20	4.25217e-19	0.708
50227	c47170_g1_i1	activating signal cointegrator 1 complex subunit 2	405	20	9.61652e-43	0.699
53145	c50127_g1_i1	activating signal cointegrator 1 complex subunit 2 isoform 1	328	3	3.01882e-06	0.64
58942	c56072_g1_i1	activating signal cointegrator 1 complex subunit 2 isoform 1	719	20	9.13593e-16	0.4995
32014	c28585_g1_i1	activating signal cointegrator 1 complex subunit 2 isoform x2	270	20	8.91723e-12	0.7105
18034	c15764_g1_i1	activating signal cointegrator 1 complex subunit 3	4310	20	0	0.775
29844	c26381_g1_i1	activating signal cointegrator 1 complex subunit 3	1494	20	1.70559e-114	0.603
31069	c27626_g1_i1	activating signal cointegrator 1 complex subunit 3-like	1203	20	0	0.8035
47355	c44234_g1_i1	activating signal cointegrator 1-like	279	16	1.67754e-08	0.6344
11613	c12084_g1_i1	activating transcription factor 7-interacting protein 1	747	20	2.10525e-41	0.697
11614	c12084_g1_i2	activating transcription factor 7-interacting protein 1	1896	20	2.89803e-40	0.628
12579	c12926_g2_i1	activating transcription factor 7-interacting protein 2	465	1	3.56599e-06	0.75
17569	c15672_g4_i2	activating transcription factor 7-interacting protein 2	228	1	1.76159e-06	0.84
59646	c56776_g1_i1	activating transcription factor of chaperone-like	1929	20	2.49899e-80	0.735
59227	c56358_g1_i1	activator of 90 kda heat shock protein atpase homolog 1-like	1561	20	5.43697e-114	0.673
37726	c34433_g1_i1	activator of basal transcription 1-like	1023	20	1.67293e-42	0.6715
22985	c19367_g1_i1	active breakpoint cluster region-related	370	20	8.96495e-22	0.765
66085	c63345_g1_i1	activin receptor type-1	209	20	1.30939e-34	0.883
29512	c26047_g1_i1	activin receptor type-1-like isoform x2	509	20	4.61631e-13	0.524
35636	c32331_g1_i1	activin receptor type-2b- partial	293	2	4.48313e-06	0.71
29081	c25615_g1_i1	activin receptor type-2b-like	643	20	2.71565e-21	0.537
29771	c26308_g1_i1	activin receptor type-2b-like	510	20	1.11454e-97	0.8785
30429	c26973_g1_i1	acyl- :lysophosphatidylglycerol acyltransferase 1	297	20	6.74421e-39	0.76
34377	c31026_g1_i1	acyl- :lysophosphatidylglycerol acyltransferase 1-like	246	20	1.81107e-13	0.6025
32735	c29328_g1_i1	acyl- -binding domain-containing protein 5-like	261	20	1.89032e-10	0.819
52796	c49777_g1_i1	acyl- -binding domain-containing protein 5-like	1048	20	1.09995e-22	0.7145
11242	c11711_g1_i1	acyl- -binding domain-containing protein 6	1496	20	1.87748e-66	0.6235
11243	c11711_g1_i2	acyl- -binding domain-containing protein 6	1557	20	3.08709e-66	0.6235
60789	c57932_g1_i1	acyl- -binding protein	529	20	1.91037e-40	0.835
20555	c16905_g1_i1	acyl- dehydrogenase	629	20	1.09904e-55	0.7425
38750	c35462_g1_i1	acyl- dehydrogenase	271	20	2.2334e-46	0.8465
1696	c1797_g1_i1	acyl- dehydrogenase family member mitochondrial-like	2729	20	0	0.7235
20017	c16362_g1_i1	acyl- dehydrogenase -like	685	20	2.07937e-53	0.6375
9255	c9750_g1_i1	acyl- oxidase	2194	20	0	0.7235
56641	c53697_g1_i1	acyl- synthetase	214	20	7.08462e-25	0.8685
47759	c44643_g1_i1	acyl- synthetase amp-acid ligase	203	20	9.68747e-25	0.8395
46534	c43399_g1_i1	acyl- thioesterase 3	352	20	1.37636e-21	0.581
39083	c35801_g1_i1	acylamino-acid-releasing enzyme	231	20	1.86439e-13	0.606
58590	c55711_g1_i1	acylamino-acid-releasing enzyme-like	201	20	7.79045e-14	0.647
61225	c58372_g1_i1	acylamino-acid-releasing enzyme-like	577	12	2.30762e-08	0.6667
22164	c18537_g1_i1	acyl-coenzyme a synthetase mitochondrial	703	20	1.19258e-20	0.552
31352	c27913_g1_i1	acyl-coenzyme a synthetase mitochondrial	472	20	2.84315e-46	0.6975
38329	c35040_g1_i1	acyl-coenzyme a synthetase mitochondrial	350	20	1.07979e-40	0.8575
61766	c58926_g1_i1	acyl-coenzyme a synthetase mitochondrial	266	20	3.15931e-27	0.73
9695	c10222_g1_i1	acyl-coenzyme a thioesterase 4-like isoform x1	546	20	1.47568e-23	0.5475
12074	c12499_g1_i1	acyl-coenzyme a thioesterase 4-like isoform x1	706	20	7.51332e-19	0.4675
13126	c13353_g1_i1	acyl-coenzyme a thioesterase 4-like isoform x1	901	20	7.83348e-33	0.559
13138	c13363_g1_i1	acyl-coenzyme a thioesterase 4-like isoform x1	669	20	1.0971e-31	0.526
15960	c15137_g1_i1	acyl-coenzyme a thioesterase 4-like isoform x1	943	10	2.07744e-10	0.576
19128	c15934_g1_i1	acyl-coenzyme a thioesterase 4-like isoform x1	4507	11	2.34122e-11	0.5927
19133	c15934_g1_i4	acyl-coenzyme a thioesterase 4-like isoform x1	4704	8	2.22757e-08	0.495
19522	c15986_g1_i1	acyl-coenzyme a thioesterase 4-like isoform x1	455	16	9.4246e-17	0.5506
19524	c15986_g1_i3	acyl-coenzyme a thioesterase 4-like isoform x1	519	16	4.33977e-17	0.5544
19527	c15986_g1_i4	acyl-coenzyme a thioesterase 4-like isoform x1	375	20	9.07018e-17	0.5545
46779	c43651_g1_i1	acyl-coenzyme a thioesterase 4-like isoform x1	357	20	3.92415e-20	0.5885
31397	c27960_g1_i1	acyl-coenzyme a thioesterase mitochondrial	984	20	6.64322e-84	0.628
60942	c58086_g1_i1	acyl-coenzyme a thioesterase mitochondrial	216	20	1.19852e-17	0.6845
43940	c40772_g1_i1	acyl-coenzyme a thioesterase mitochondrial-like	731	20	2.12437e-49	0.747
47366	c44245_g1_i1	acylglycerol mitochondrial	370	10	2.2133e-11	0.541
57318	c54394_g1_i1	acylglycerol mitochondrial-like	709	20	9.03015e-73	0.652
12178	c12582_g1_i1	acylphosphatase-1-like	1196	20	3.80977e-35	0.7725
9557	c10082_g2_i1	acyl-protein thioesterase 1-like	1871	20	3.51762e-103	0.787
12838	c13126_g1_i1	acylpyruvase mitochondrial-like	1280	20	7.85775e-91	0.7185
12840	c13126_g1_i3	acylpyruvase mitochondrial-like	937	20	1.63308e-82	0.721
51204	c48179_g1_i1	adam 11	751	20	2.09616e-73	0.6485
48760	c45669_g1_i1	adam 12	408	20	2.46001e-18	0.515
55597	c52622_g1_i1	adam 12	410	20	1.40117e-17	0.67
32697	c29288_g1_i1	adam 17-like protease-like	370	20	1.78252e-52	0.8435
55130	c52139_g1_i1	adam 17-like protease-like	589	20	2.52816e-62	0.64
62661	c59835_g1_i1	adam 17-like protease-like	282	20	1.04701e-38	0.794
23295	c19682_g1_i1	adam 19	326	20	9.48324e-53	0.791
53379	c50362_g1_i1	adam 19	255	20	1.91616e-26	0.6915
3033	c3106_g1_i1	adam 9	1188	20	1.22032e-93	0.604
45777	c42630_g1_i1	adam 9	427	14	2.77792e-19	0.5736
51978	c48954_g1_i1	adam 9	385	20	1.53399e-26	0.6705
16026	c15159_g1_i1	adamts-like protein 5-like	4158	20	6.50845e-60	0.5425
29906	c26444_g1_i1	adapter molecule crk	528	20	8.84996e-85	0.782
35710	c32405_g1_i1	adapter molecule crk	438	20	7.58717e-16	0.87
61440	c58591_g1_i1	adapter-related protein	515	20	1.09499e-16	0.5805
13597	c13709_g2_i1	adaptin ear-binding coat-associated protein 1	833	17	1.17787e-13	0.4582
54597	c51597_g1_i1	additional sex isoform a	1565	20	1.21368e-07	0.74
49319	c46237_g1_i1	ade3	223	20	1.77639e-18	0.7015
39056	c35772_g1_i1	adenine phosphoribosyltransferase	228	20	9.45434e-18	0.6895
13133	c13357_g1_i1	adenomatous polyposis coli protein	6154	20	6.64751e-20	0.611
15591	c14960_g1_i1	adenomatous polyposis coli protein	7811	20	0	0.712
15592	c14960_g1_i2	adenomatous polyposis coli protein	8051	20	0	0.7185
29101	c25635_g1_i1	adenosine 3 -phospho 5 -phosphosulfate transporter 1	353	20	2.14158e-31	0.669
4816	c5060_g1_i2	adenosine a2 receptor	1078	20	2.1853e-33	0.6895
1507	c1631_g1_i1	adenosine deaminase	2935	20	8.88711e-92	0.6025
1508	c1631_g1_i2	adenosine deaminase	2997	20	2.27739e-105	0.608
37601	c34304_g1_i1	adenosine deaminase cecr1-like	971	20	5.16579e-121	0.6965
26694	c23166_g1_i1	adenosine deaminase-like	249	20	1.80216e-13	0.6715
61069	c58215_g1_i1	adenosine deaminase-like protein	567	20	9.4235e-54	0.674
7532	c7830_g1_i1	adenosine kinase 2-like	1469	20	2.63798e-126	0.678
7533	c7830_g1_i2	adenosine kinase 2-like	1556	20	8.17048e-150	0.7505
19694	c16042_g1_i1	adenosine monophosphate-protein transferase ficd homolog	1355	20	5.57189e-158	0.741
33071	c29675_g1_i1	adenosine receptor a2b	516	20	7.01154e-15	0.7065
4815	c5060_g1_i1	adenosine receptor a2b-like	1372	20	2.72039e-78	0.614
65787	c63039_g1_i1	adenosine rna-specific	721	3	1.842e-12	0.5367
573	c564_g1_i1	adenosylhomocysteinase	1493	20	0	0.888
16211	c15244_g1_i1	adenosylhomocysteinase 3-like	4494	20	0	0.9415
16212	c15244_g1_i2	adenosylhomocysteinase 3-like	4923	20	0	0.942
2959	c3035_g1_i1	adenylate cyclase	719	20	4.53633e-84	0.7225
8676	c9112_g1_i1	adenylate cyclase	523	20	6.66138e-66	0.742
8677	c9112_g1_i2	adenylate cyclase	472	20	2.45064e-66	0.7445
27199	c23695_g1_i1	adenylate cyclase	295	20	1.9172e-21	0.683
35472	c32165_g1_i1	adenylate cyclase	1897	20	9.98547e-105	0.507
40705	c37454_g1_i1	adenylate cyclase	220	20	1.40544e-16	0.667
41514	c38280_g1_i1	adenylate cyclase	248	1	2.19337e-08	0.75
49430	c46348_g1_i1	adenylate cyclase	363	8	2.1023e-24	0.6588
65613	c62857_g1_i1	adenylate cyclase	294	20	4.95972e-45	0.8365
8678	c9112_g1_i3	adenylate cyclase type	496	20	2.42558e-69	0.786
38092	c34802_g1_i1	adenylate cyclase type	581	20	6.84565e-49	0.7235
40298	c37039_g1_i1	adenylate cyclase type	634	20	6.81594e-97	0.803
60246	c57383_g1_i1	adenylate cyclase type	254	12	4.91013e-12	0.7733
2793	c2877_g1_i1	adenylate cyclase type 2-like	2909	20	7.78001e-123	0.7565
2794	c2877_g1_i2	adenylate cyclase type 2-like	2784	20	6.6627e-69	0.756
51048	c48023_g1_i1	adenylate cyclase type 2-like	1977	20	4.39026e-141	0.7385
27606	c24126_g1_i1	adenylate cyclase type 5	966	20	3.68375e-176	0.8065
30474	c27019_g1_i1	adenylate cyclase type 5	667	20	6.85421e-24	0.4745
28743	c25275_g1_i1	adenylate cyclase type 5-like	579	20	2.73508e-98	0.9145
31385	c27948_g1_i1	adenylate cyclase type 6	600	20	6.627e-46	0.6325
49307	c46225_g1_i1	adenylate cyclase type 8-like	234	20	1.41875e-36	0.8415
45395	c42241_g1_i1	adenylate cyclase type 9	1552	20	7.60171e-144	0.772
47546	c44428_g1_i1	adenylate cyclase type 9	222	6	3.92792e-08	0.6183
44061	c40894_g1_i1	adenylate cyclase type 9-like	446	20	1.75474e-34	0.5995
11898	c12331_g1_i1	adenylate cyclase type ix	2068	20	6.36242e-158	0.6575
11899	c12331_g1_i2	adenylate cyclase type ix	2037	20	2.59595e-158	0.6575
11900	c12331_g1_i3	adenylate cyclase type ix	1905	20	3.15382e-132	0.6055
10002	c10573_g1_i1	adenylate kinase 2	1083	20	2.52745e-116	0.8455
10003	c10573_g1_i2	adenylate kinase 2	1116	20	8.85138e-121	0.8295
55253	c52266_g1_i1	adenylate kinase 3	344	20	2.04276e-38	0.733
7311	c7634_g1_i1	adenylate kinase isoenzyme 6-like	774	20	2.39469e-69	0.821
23865	c20265_g1_i1	adenylosuccinate lyase-like	1456	20	0	0.8435
21632	c17993_g1_i1	adenylosuccinate synthetase-like	1557	20	0	0.7795
18834	c15898_g5_i1	adenylyl cyclase-associated protein 1-like	7868	20	8.23919e-145	0.6405
18835	c15898_g5_i2	adenylyl cyclase-associated protein 1-like	7828	20	7.9808e-145	0.6405
18836	c15898_g5_i3	adenylyl cyclase-associated protein 1-like	6997	20	2.49549e-141	0.6605
18837	c15898_g5_i4	adenylyl cyclase-associated protein 1-like	7615	20	6.56582e-145	0.6405
18838	c15898_g5_i5	adenylyl cyclase-associated protein 1-like	5161	20	8.82363e-147	0.6405
14773	c14520_g1_i1	adhesive plaque matrix	371	5	7.95516e-08	0.556
62939	c60116_g1_i1	adhesive plaque matrix protein	307	20	1.71651e-12	0.578
5141	c5403_g1_i1	adipocyte plasma membrane-associated	1180	20	2.34013e-54	0.581
63049	c60228_g1_i1	adipocyte plasma membrane-associated	547	20	1.47192e-22	0.6315
21088	c17441_g1_i1	adipor-like receptor cg5315-like	1908	20	2.62402e-170	0.7795
3964	c4139_g1_i1	adp atp translocase	1367	20	0	0.9075
59548	c56678_g1_i1	adp-ribose mitochondrial	1095	20	8.28835e-111	0.7025
182	c178_g1_i1	adp-ribosylation factor 1	3110	20	4.025e-117	0.977
43910	c40742_g1_i1	adp-ribosylation factor 4	1626	20	7.96022e-120	0.9375
30820	c27373_g1_i1	adp-ribosylation factor 6	305	20	2.98378e-67	0.98
54803	c51807_g1_i1	adp-ribosylation factor gtpase-activating	406	20	1.12174e-55	0.8995
38503	c35213_g1_i1	adp-ribosylation factor gtpase-activating protein 1-like	205	20	1.98427e-10	0.8775
10252	c10786_g1_i1	adp-ribosylation factor gtpase-activating protein 2	1999	20	1.26933e-122	0.581
10253	c10786_g1_i2	adp-ribosylation factor gtpase-activating protein 2	1974	20	1.11255e-123	0.5835
55386	c52402_g1_i1	adp-ribosylation factor-binding protein gga1-like	488	20	1.90153e-52	0.7465
56307	c53351_g1_i1	adp-ribosylation factor-like 2	708	20	3.05286e-90	0.8475
51158	c48133_g1_i1	adp-ribosylation factor-like protein 16-like	840	20	2.32296e-25	0.643
37969	c34677_g1_i1	adp-ribosylation factor-like protein 1-like	946	20	2.52391e-116	0.9255
2602	c2702_g1_i1	adp-ribosylation factor-like protein 2-binding protein	551	20	4.79398e-29	0.6385
2603	c2702_g1_i2	adp-ribosylation factor-like protein 2-binding protein	536	20	5.90981e-29	0.643
14999	c14635_g1_i1	adp-ribosylation factor-like protein 4a	1620	20	3.13141e-33	0.591
21396	c17756_g1_i1	adp-ribosylation factor-like protein 4c-like	1333	20	2.6342e-96	0.8295
2584	c2685_g1_i1	adp-ribosylation factor-like protein 5b-like	1208	20	1.56652e-109	0.9265
61222	c58369_g1_i1	adp-ribosylation factor-like protein 6	636	20	2.30131e-45	0.838
45945	c42804_g1_i1	adp-ribosylation factor-like protein 6-interacting protein 1	810	20	8.94166e-30	0.5955
54698	c51699_g1_i1	adp-ribosylation factor-like protein 6-interacting protein 4-like	769	20	1.89318e-26	0.8045
45250	c42095_g1_i1	adp-ribosylation factor-like protein 6-like	1238	20	9.62462e-21	0.866
11139	c11615_g1_i1	adp-ribosylation factor-like protein 8b	2436	20	2.36454e-121	0.9725
8258	c8576_g1_i1	adp-ribosylation factor-related protein 1-like	871	20	7.69427e-115	0.863
50974	c47951_g1_i1	adrenodoxin-like mitochondrial-like	405	20	8.83778e-39	0.806
53845	c50833_g1_i1	af099908_1transposase homolog	512	2	8.1243e-06	0.485
10363	c10913_g1_i1	af134586_1reverse transcriptase-like protein	3179	1	2.0598e-06	0.59
58245	c55350_g1_i1	af188633_1 m protein	296	20	4.93925e-15	0.7485
36704	c33401_g1_i1	af263607_1cytochrome p450 cyp4	286	3	8.49743e-36	0.8967
42373	c39180_g1_i1	af355752_1reverse transcriptase	435	3	2.12547e-08	0.7367
56722	c53780_g1_i1	af355752_1reverse transcriptase	461	1	2.69884e-06	0.58
14194	c14135_g1_i1	af4 fmr2 family member 3	8905	20	3.28305e-44	0.603
14195	c14135_g1_i2	af4 fmr2 family member 3	8605	20	3.13421e-44	0.603
22694	c19074_g1_i1	afadin- and alpha-actinin-binding protein	376	20	4.42518e-13	0.6345
35248	c31945_g1_i1	afadin-like isoform x5	5182	20	0	0.6395
8837	c9312_g1_i1	afg3-like protein 2-like	3522	20	0	0.8105
32385	c28969_g1_i1	aftiphilin-like isoform x2	546	20	1.19012e-11	0.5035
12335	c12705_g1_i1	AGAP004169-PA	1217	2	5.49582e-08	0.54
45343	c42189_g1_i1	AGAP004983-PA	448	1	9.10019e-06	0.51
8492	c8902_g1_i1	AGAP006184-PA	2907	5	1.5212e-07	0.464
8493	c8902_g1_i2	AGAP006184-PA	2955	5	1.55551e-07	0.464
8494	c8902_g1_i3	AGAP006184-PA	2924	5	1.53407e-07	0.464
15055	c14672_g1_i1	agap007532-pa isoform 2	6453	20	0	0.794
8890	c9368_g1_i1	AGAP007696-PA	2661	1	9.47017e-06	0.65
35564	c32258_g1_i1	AGAP010005-PA	273	20	9.93664e-41	0.8355
48497	c45400_g1_i1	agap010969	435	20	2.20441e-25	0.575
52832	c49814_g1_i1	aggrecan core protein isoform x2	486	20	1.31721e-19	0.509
14210	c14146_g1_i1	agmatinase	1636	20	4.67599e-159	0.7645
33911	c30543_g1_i1	agrin	446	20	2.63601e-28	0.5325
50118	c47059_g1_i1	agrin-like	233	20	3.9902e-25	0.8135
30983	c27537_g1_i1	a-kinase anchor protein	210	1	1.26801e-06	0.6
2432	c2519_g1_i1	a-kinase anchor protein 13-like	873	20	2.22074e-48	0.657
41953	c38736_g1_i1	a-kinase anchor protein 13-like	222	20	8.67909e-21	0.742
44774	c41613_g1_i1	a-kinase anchor protein 7 isoform gamma-like	646	20	7.02615e-27	0.5775
32289	c28867_g1_i1	a-kinase anchor protein 9	485	20	2.23632e-13	0.548
43230	c40063_g1_i1	akt-interacting protein isoform x1	1744	20	1.77924e-89	0.7015
21413	c17773_g1_i1	aladin isoform x1	331	20	5.66381e-28	0.699
52091	c49069_g1_i1	aladin-like isoform x2	403	20	6.65381e-15	0.572
11380	c11837_g1_i1	alanine aminotransferase	2296	20	0	0.742
11381	c11837_g1_i2	alanine aminotransferase	1923	20	0	0.795
11382	c11837_g1_i3	alanine aminotransferase	2386	20	0	0.795
11519	c11966_g2_i1	alanine racemase	1120	20	4.30786e-151	0.51
11520	c11966_g2_i2	alanine racemase	1469	20	0	0.511
13242	c13443_g1_i2	alanine-glyoxylate aminotransferase	1843	20	4.94801e-177	0.787
10117	c10671_g1_i1	alanine--glyoxylate aminotransferase 2-like	2467	20	0	0.782
10118	c10671_g1_i2	alanine--glyoxylate aminotransferase 2-like	2453	20	0	0.775
13241	c13443_g1_i1	alanine--glyoxylate aminotransferase mitochondrial-like isoform x2	2029	20	0	0.7715
8839	c9314_g1_i1	alanine--trna mitochondrial-like	477	20	1.53341e-35	0.612
8840	c9314_g1_i2	alanine--trna mitochondrial-like	649	20	7.14038e-46	0.599
8841	c9314_g1_i3	alanyl trna partial	208	20	8.01225e-09	0.7255
47284	c44163_g1_i1	alanyl-trna cytoplasmic	308	20	9.60377e-14	0.7465
50668	c47632_g1_i1	alanyl-trna cytoplasmic	269	20	8.54554e-22	0.8035
5216	c5471_g1_i1	alanyl-trna editing protein aarsd1	1142	20	9.95182e-108	0.6975
5217	c5471_g1_i2	alanyl-trna editing protein aarsd1	1300	20	3.24156e-137	0.665
6256	c6528_g1_i1	alanyl-trna synthetase	2166	20	0	0.7555
40151	c36890_g1_i1	alanyl-trna synthetase	248	20	7.79629e-45	0.8525
62126	c59291_g1_i1	alba-like protein c9orf23-like	1084	20	8.20426e-35	0.604
19752	c16101_g1_i1	alcohol dehydrogenase	1068	20	6.59987e-105	0.713
22196	c18570_g1_i1	alcohol dehydrogenase	540	20	8.81324e-52	0.6685
40866	c37618_g1_i1	alcohol dehydrogenase	432	20	7.18147e-38	0.7085
64052	c61250_g1_i1	alcohol dehydrogenase	280	20	4.58878e-16	0.63
44507	c41344_g1_i1	alcohol dehydrogenase class-3-like	1342	20	0	0.886
44294	c41130_g1_i1	aldehyde dehydrogenase	340	20	1.99438e-45	0.7785
41219	c37979_g1_i1	aldehyde dehydrogenase 16 member a1	329	20	1.92462e-44	0.763
54228	c51222_g1_i1	aldehyde dehydrogenase 16 member a1	531	20	2.16922e-81	0.916
26608	c23077_g1_i1	aldehyde dehydrogenase family 1 member a3 isoform x1	313	20	4.9239e-42	0.826
29846	c26383_g1_i1	aldehyde dehydrogenase family 16 member a1	433	20	1.28782e-56	0.7365
30466	c27011_g1_i1	aldehyde dehydrogenase family 16 member a1	413	20	3.52834e-49	0.6755
61397	c58548_g1_i1	aldehyde dehydrogenase family 16 member a1-like	308	20	3.3141e-49	0.8395
12189	c12592_g1_i1	aldehyde dehydrogenase family 8 member a1	453	20	2.27124e-26	0.8025
36554	c33249_g1_i1	aldehyde dehydrogenase family 8 member a1 isoform x1	477	20	4.06322e-68	0.793
58237	c55342_g1_i1	aldehyde dehydrogenase family 8 member a1 isoform x1	315	20	7.09395e-41	0.7415
17518	c15662_g1_i1	aldehyde dimeric nadp-preferring-like isoform 1	3887	20	0	0.7285
17519	c15662_g1_i2	aldehyde dimeric nadp-preferring-like isoform 1	3884	20	0	0.7385
28359	c24888_g1_i1	aldehyde mitochondrial isoform x1	1948	20	0	0.827
13836	c13904_g1_i1	aldehyde oxidase	5089	20	0	0.587
13837	c13904_g1_i2	aldehyde oxidase	5051	20	0	0.587
26746	c23220_g1_i1	aldehyde oxidase	311	20	7.03166e-23	0.634
43960	c40792_g1_i1	aldehyde oxidase	229	12	2.426e-11	0.6225
42847	c39675_g1_i1	aldehyde oxidase 2	213	20	9.54689e-12	0.6305
18407	c15824_g1_i1	aldo-keto reductase	1313	20	1.16609e-147	0.772
18408	c15824_g1_i2	aldo-keto reductase	674	20	2.95246e-92	0.761
26089	c22538_g1_i1	aldo-keto reductase	290	20	3.02086e-19	0.7365
36481	c33177_g1_i1	aldo-keto reductase	1391	20	6.96436e-171	0.7715
9166	c9650_g1_i1	aldose 1-epimerase	676	20	2.63429e-59	0.6475
21558	c17919_g1_i1	aldose 1-epimerase	938	20	1.15232e-36	0.6315
5877	c6095_g1_i1	aliphatic nitrilase	1678	20	0	0.7915
61615	c58772_g1_i1	alk tyrosine kinase receptor	463	20	6.90106e-22	0.5655
20642	c16992_g1_i1	alk tyrosine kinase receptor-like	594	20	3.81728e-26	0.4785
36000	c32695_g1_i1	alkaline ceramidase	1102	20	3.3392e-68	0.6445
30409	c26953_g1_i1	alkaline phosphatase	253	20	3.00209e-08	0.74
1942	c2032_g1_i1	alkaline tissue-nonspecific isozyme	729	20	4.38206e-39	0.6585
11703	c12165_g1_i1	alkaline tissue-nonspecific isozyme	866	20	3.29934e-91	0.6005
17978	c15753_g2_i1	alkaline tissue-nonspecific isozyme	3055	20	9.44045e-134	0.636
43138	c39972_g1_i1	alkaline tissue-nonspecific isozyme-like	352	20	8.58496e-36	0.6945
51882	c48856_g1_i1	alkaline tissue-nonspecific isozyme-like	712	20	4.22082e-113	0.7385
859	c885_g1_i1	alkylated dna repair protein alkb homolog 1-like	838	20	1.62357e-43	0.646
56253	c53293_g1_i1	alkylated dna repair protein alkb homolog 1-like	268	20	6.99878e-16	0.555
26245	c22700_g1_i1	alkylated dna repair protein alkb homolog 8	295	20	1.17024e-18	0.723
25928	c22370_g1_i1	alkylated dna repair protein alkb homolog 8-like	220	20	1.39191e-08	0.674
27205	c23701_g1_i1	alkylated dna repair protein alkb homolog 8-like	206	20	9.18532e-18	0.669
52444	c49425_g1_i1	alkylated dna repair protein alkb homolog 8-like	629	20	7.11439e-34	0.549
31140	c27698_g1_i1	alkyldihydroxyacetonephosphate peroxisomal	287	20	1.55229e-41	0.81
33689	c30314_g1_i1	alkyldihydroxyacetonephosphate peroxisomal	242	20	4.0945e-29	0.8435
44952	c41793_g1_i1	alkyldihydroxyacetonephosphate peroxisomal-like	267	20	6.92814e-28	0.7595
58823	c55952_g1_i1	allatostatin c preprohormone	1546	16	1.4355e-21	0.8275
6408	c6677_g2_i1	allatostatin neuropeptide precursor	958	20	7.4958e-76	0.516
35027	c31711_g1_i1	allatostatin neuropeptide precursor	203	20	2.1927e-27	0.719
6407	c6677_g1_i1	allatostatin precursor protein	513	11	4.30179e-43	0.5573
62114	c59279_g1_i1	allatostatin precursor protein	868	4	7.39466e-20	0.71
12575	c12923_g1_i1	allatostatin-a receptor-like	3042	20	1.51369e-100	0.7395
10931	c11419_g1_i1	allatostatin-cc	1884	5	1.70385e-09	0.562
10932	c11419_g1_i2	allatostatin-cc	1952	5	1.81415e-09	0.562
14434	c14299_g3_i1	allene oxide synthase-lipoxygenase	2721	20	0	0.5845
14435	c14299_g3_i2	allene oxide synthase-lipoxygenase	2648	20	0	0.5975
61640	c58800_g1_i1	allergen ale o 13	538	11	3.81245e-13	0.5291
11264	c11730_g1_i1	all-trans-retinol -reductase-like	2482	20	1.08529e-141	0.6625
11265	c11730_g1_i2	all-trans-retinol -reductase-like	2597	20	0	0.6685
6975	c7301_g1_i1	alpha 2 macroglobulin	5313	20	0	0.609
57671	c54762_g1_i1	alpha 2 macroglobulin	261	20	5.53846e-36	0.694
1063	c1097_g1_i1	alpha 2-macroglobulin	761	20	2.77661e-117	0.746
10739	c11244_g1_i1	alpha 2-macroglobulin	315	20	5.84236e-34	0.682
10740	c11244_g1_i2	alpha 2-macroglobulin	203	6	3.64788e-13	0.8183
12061	c12489_g1_i1	alpha 2-macroglobulin	4976	20	0	0.6105
12062	c12489_g1_i2	alpha 2-macroglobulin	4961	20	0	0.6105
33879	c30510_g1_i1	alpha 2-macroglobulin	274	20	1.75165e-37	0.747
39388	c36112_g1_i1	alpha 2-macroglobulin	208	14	1.56764e-26	0.7193
49972	c46903_g1_i1	alpha 2-macroglobulin	215	20	1.20094e-35	0.8095
25640	c22071_g1_i1	alpha amylase	230	20	1.45001e-23	0.7325
62104	c59269_g1_i1	alpha amylase	241	13	1.05359e-12	0.64
64752	c61966_g1_i1	alpha- and gamma-adaptin-binding protein p34	512	20	4.13959e-10	0.7395
60007	c57141_g1_i1	alpha- and gamma-adaptin-binding protein p34-like	683	20	5.04221e-31	0.567
21808	c18172_g1_i1	alpha beta hydrolase	512	19	5.82168e-11	0.65
24852	c21267_g1_i1	alpha beta hydrolase	232	20	3.35175e-10	0.589
43381	c40216_g1_i1	alpha beta hydrolase	737	20	4.75902e-23	0.593
16370	c15308_g1_i1	alpha isoform cra_b	2933	20	6.40254e-121	0.951
38354	c35064_g1_i1	alpha mannosidase isoform k	428	20	2.01582e-60	0.806
60292	c57430_g1_i1	alpha- -mannosyl-glycoprotein 2-beta-n-acetylglucosaminyltransferase	481	20	2.40317e-49	0.7475
20464	c16812_g1_i1	alpha- -mannosyl-glycoprotein 2-beta-n-acetylglucosaminyltransferase-like	528	20	5.26394e-88	0.822
35005	c31688_g1_i1	alpha- -mannosyl-glycoprotein 2-beta-n-acetylglucosaminyltransferase-like	263	20	1.30497e-40	0.8765
43991	c40823_g1_i1	alpha- -mannosyl-glycoprotein 4-beta-n-acetylglucosaminyltransferase b-like	379	20	2.05207e-68	0.86
52947	c49929_g1_i1	alpha- -mannosyl-glycoprotein 4-beta-n-acetylglucosaminyltransferase b-like	626	20	2.56059e-30	0.5815
36851	c33547_g1_i1	alpha- -mannosyl-glycoprotein 4-beta-n-acetylglucosaminyltransferase c	495	20	1.72755e-07	0.584
39711	c36441_g1_i1	alpha- -mannosyl-glycoprotein 4-beta-n-acetylglucosaminyltransferase c	748	20	6.35979e-23	0.552
59415	c56546_g1_i1	alpha- -mannosyltransferase alg2	508	20	1.25838e-61	0.7465
21930	c18296_g1_i1	alpha- -mannosyltransferase alg2-like	318	20	6.733e-26	0.8435
21017	c17369_g1_i1	alpha- -mannosyltransferase alg2-like isoform x2	387	20	2.88102e-49	0.756
37588	c34291_g1_i1	alpha- -mannosyltransferase alg9	1169	20	2.95669e-143	0.683
53817	c50805_g1_i1	alpha- -mannosyltransferase alg9	432	20	7.58994e-61	0.7905
35404	c32098_g1_i1	alpha partial	591	20	1.86735e-34	0.735
10046	c10606_g1_i1	alpha- partial	350	20	2.04575e-77	0.977
12925	c13189_g1_i1	alpha- sarcomeric-like isoform 1	4404	20	0	0.8975
9953	c10530_g2_i1	alpha tubulin	2119	20	0	0.9695
15048	c14667_g2_i1	alpha tubulin	380	20	2.8748e-66	0.9605
30859	c27413_g1_i1	alpha tubulin	782	20	1.39123e-100	0.8965
63574	c60763_g1_i1	alpha tubulin	242	20	2.06664e-38	0.976
26779	c23255_g1_i1	alpha-( )-fucosyltransferase c	370	20	4.97933e-35	0.6555
29082	c25616_g1_i1	alpha-( )-fucosyltransferase- partial	322	20	2.69771e-43	0.7785
24098	c20499_g1_i1	alpha-( )-fucosyltransferase-like	284	20	7.29944e-39	0.7955
33941	c30575_g1_i1	alpha-( )-fucosyltransferase-like	222	20	2.99456e-32	0.8515
27824	c24345_g1_i1	alpha-2-macroglobulin receptor-associated	1693	20	4.11914e-92	0.6085
59009	c56139_g1_i1	alpha-aminoadipic semialdehyde dehydrogenase-like	2072	20	0	0.833
6624	c6927_g1_i1	alpha-aminoadipic semialdehyde mitochondrial-like	1513	20	2.30341e-180	0.7715
7789	c8113_g1_i1	alpha-aminoadipic semialdehyde mitochondrial-like	768	20	2.87738e-115	0.8405
7790	c8113_g1_i2	alpha-aminoadipic semialdehyde mitochondrial-like	896	20	2.45982e-164	0.8595
13503	c13640_g1_i1	alpha-aminoadipic semialdehyde mitochondrial-like	657	20	6.96203e-22	0.6915
16674	c15430_g1_i1	alpha-aminoadipic semialdehyde mitochondrial-like	718	20	2.54942e-55	0.8515
16675	c15430_g1_i2	alpha-aminoadipic semialdehyde mitochondrial-like	412	20	5.64472e-33	0.8575
30864	c27418_g1_i1	alpha-aminoadipic semialdehyde mitochondrial-like	204	20	7.7385e-16	0.744
32349	c28929_g1_i1	alpha-amylase	323	20	3.04587e-41	0.716
46112	c42971_g1_i1	alpha-amylase	234	20	1.65832e-26	0.7625
43870	c40702_g1_i1	alpha-aspartyl dipeptidase	1090	20	5.70423e-108	0.7645
13368	c13529_g1_i2	alpha-cardiac actin	303	20	6.2998e-53	0.955
11829	c12277_g1_i1	alpha-galactosidase alpha-n-acetylgalactosaminidase	1995	20	0	0.8275
11830	c12277_g1_i2	alpha-galactosidase alpha-n-acetylgalactosaminidase	2024	20	0	0.8275
5402	c5647_g1_i1	alpha-glucosidase 1	223	20	2.54506e-23	0.79
4189	c4404_g1_i1	alpha-ketoglutarate-dependent dioxygenase alkb homolog 2	548	20	8.09957e-62	0.738
59629	c56759_g1_i1	alpha-ketoglutarate-dependent dioxygenase alkb homolog 3	232	3	2.63413e-07	0.5167
2948	c3022_g1_i1	alpha-ketoglutarate-dependent dioxygenase alkb homolog 6	668	20	4.89777e-54	0.63
61712	c58873_g1_i1	alpha-ketoglutarate-dependent sulfonate dioxygenase-like isoform x4	1051	20	6.6265e-130	0.707
25183	c21603_g1_i1	alpha-l- plasma	239	20	4.31878e-13	0.5965
13672	c13770_g1_i1	alpha-l-iduronidase-like	2656	20	2.3908e-134	0.5085
13673	c13770_g1_i2	alpha-l-iduronidase-like	2752	20	2.31147e-156	0.548
4123	c4329_g1_i1	alpha-mannosidase 2	787	20	7.48941e-43	0.55
21067	c17420_g1_i1	alpha-mannosidase 2	584	13	6.0555e-07	0.4723
32713	c29306_g1_i1	alpha-mannosidase 2c1	214	13	1.28067e-10	0.5862
64279	c61483_g1_i1	alpha-mannosidase 2c1-like	325	20	9.78754e-18	0.597
44722	c41561_g1_i1	alpha-mannosidase 2x	627	20	2.03455e-82	0.7945
54195	c51187_g1_i1	alpha-mannosidase 2x isoform x3	383	20	2.41319e-42	0.795
53315	c50297_g1_i1	alpha-mannosidase 2x-like	643	20	7.57437e-103	0.808
64011	c61208_g1_i1	alpha-methylacyl- racemase	343	20	3.12561e-31	0.628
58290	c55398_g1_i1	alpha-methylacyl- racemase-like	232	20	2.13296e-25	0.8395
17821	c15726_g1_i1	alpha-n-acetylglucosaminidase	2764	20	0	0.6695
19774	c16123_g1_i1	alpha-taxilin isoform x3	758	20	7.21912e-41	0.7485
55787	c52820_g1_i1	alpha-tocopherol transfer protein	340	20	7.49402e-29	0.638
12387	c12747_g1_i1	alpha-tubulin n-acetyltransferase-like	3043	20	6.15944e-54	0.6325
12388	c12747_g1_i2	alpha-tubulin n-acetyltransferase-like	3079	20	7.27177e-54	0.6325
55270	c52283_g1_i1	alternative splicing factor srp20	356	20	1.07677e-09	0.659
12393	c12755_g1_i1	amine oxidase	2516	20	8.55315e-156	0.591
12394	c12755_g1_i2	amine oxidase	2580	20	5.43937e-155	0.5925
37689	c34396_g1_i1	amine oxidase	410	20	1.0766e-21	0.6845
28927	c25460_g1_i1	amino acid	590	20	1.255e-29	0.6235
35410	c32104_g1_i1	amino acid auxin permease family	237	20	2.62509e-23	0.6585
29972	c26512_g1_i1	amino acid kinase	282	20	5.37293e-18	0.6055
49792	c46718_g1_i1	amino acid kinase family protein isoform 1	230	20	1.13656e-21	0.7105
1163	c1225_g1_i1	amino acid transporter	479	20	2.4488e-50	0.7395
50308	c47256_g1_i1	amino acid transporter ag_aat8	239	20	1.74379e-30	0.823
51891	c48865_g1_i1	aminoacyl trna synthase complex-interacting multifunctional protein 1	852	20	3.93498e-65	0.6275
22094	c18464_g1_i1	aminoacyl trna synthase complex-interacting multifunctional protein 2	1254	20	1.51917e-35	0.5185
60078	c57213_g1_i1	aminoacyl trna synthase complex-interacting multifunctional protein 2	342	20	9.98821e-15	0.544
37338	c34041_g1_i1	aminoacylase-1	1033	20	1.11112e-126	0.717
40357	c37101_g1_i1	aminoacylase-1 isoform 1	213	20	6.17011e-30	0.8225
18066	c15769_g4_i1	aminoacylase-1 isoform x1	1409	20	4.227e-172	0.717
18069	c15769_g4_i2	aminoacylase-1 isoform x1	1460	20	7.79865e-172	0.7165
61060	c58205_g1_i1	aminoacylase-1a-like	762	20	1.32933e-100	0.734
23775	c20173_g1_i1	aminoacylase-1a-like isoform x4	302	20	1.14272e-24	0.747
2978	c3052_g1_i1	aminopeptidase -like	977	20	5.57983e-88	0.674
5483	c5718_g1_i1	aminopeptidase -like	312	20	6.29887e-40	0.7955
5484	c5718_g1_i2	aminopeptidase -like	563	20	7.23525e-48	0.79
30264	c26805_g1_i1	aminopeptidase -like	368	20	2.23363e-63	0.8915
921	c945_g1_i2	aminopeptidase n	646	20	1.63645e-50	0.6255
922	c945_g1_i3	aminopeptidase n	479	20	1.20962e-40	0.688
4260	c4479_g1_i1	aminopeptidase n	429	20	2.49505e-31	0.5855
17761	c15709_g1_i1	aminopeptidase n	5483	20	0	0.6535
17762	c15709_g1_i2	aminopeptidase n	3674	20	0	0.644
17763	c15709_g1_i3	aminopeptidase n	5305	20	0	0.671
33457	c30076_g1_i1	aminopeptidase n	334	20	4.66946e-34	0.716
55921	c52957_g1_i1	aminopeptidase n	742	20	1.5322e-07	0.5795
60118	c57253_g1_i1	aminopeptidase n	678	20	7.08047e-66	0.63
64629	c61841_g1_i1	aminopeptidase n	250	20	3.40417e-20	0.6545
920	c945_g1_i1	aminopeptidase n-like	259	20	2.44676e-17	0.7695
35229	c31927_g1_i1	aminopeptidase n-like	355	20	1.8705e-37	0.718
65721	c62970_g1_i1	aminopeptidase n-like	240	20	1.11052e-12	0.5885
25556	c21983_g1_i1	aminopeptidase o-like	391	20	1.18836e-30	0.6575
34471	c31122_g1_i1	aminopeptidase o-like	356	4	2.14564e-09	0.5125
3447	c3532_g1_i1	amp deaminase 2	1724	20	0	0.8435
53151	c50133_g1_i1	amp deaminase 2	515	20	7.39889e-18	0.596
16775	c15468_g1_i2	amp-activated protein gamma regulatory subunit	4338	20	0	0.7585
29994	c26534_g1_i1	amp-dependent synthetase	665	20	5.19224e-14	0.5185
53468	c50454_g1_i1	amp-dependent synthetase	330	20	3.45694e-09	0.544
29784	c26321_g1_i1	amphoterin-induced protein 1-like	1281	7	1.03842e-08	0.4514
47342	c44221_g1_i1	amphoterin-induced protein 2	311	20	3.71053e-16	0.634
63910	c61104_g1_i1	amphoterin-induced protein 2	595	20	3.35787e-67	0.7205
11354	c11807_g1_i1	amplified in osteosarcoma	1826	1	1.16638e-07	0.67
11355	c11807_g1_i2	amplified in osteosarcoma	1436	1	6.61895e-08	0.67
14614	c14415_g1_i1	amyloid beta a4 precursor protein-binding family b member 2-like	5662	20	0	0.6675
14616	c14415_g1_i3	amyloid beta a4 precursor protein-binding family b member 2-like	5791	20	0	0.6675
15476	c14903_g1_i2	amyloid beta protein-binding member 1interacting	6607	20	2.61703e-135	0.763
6214	c6479_g1_i1	amyloid protein-binding protein 2	837	20	3.09431e-70	0.6185
56186	c53224_g1_i1	amyloid protein-binding protein 2	483	20	1.11313e-72	0.8235
62108	c59273_g1_i1	amyloid protein-binding protein 2	351	20	5.47543e-44	0.783
300	c281_g1_i1	an1-type zinc finger protein 1	2170	20	6.79244e-58	0.5645
46333	c43195_g1_i1	an1-type zinc finger protein 2b-like	243	20	3.95938e-18	0.732
11959	c12402_g1_i1	an1-type zinc finger protein 5-like	2757	20	1.52923e-33	0.6715
11960	c12402_g1_i2	an1-type zinc finger protein 5-like	2856	20	1.6994e-33	0.6715
21364	c17723_g1_i1	anaphase promoting complex subunit 1	765	20	1.13561e-26	0.629
30123	c26662_g1_i1	anaphase-promoting complex	797	20	7.39622e-44	0.5375
57720	c54811_g1_i1	anaphase-promoting complex	210	4	6.78186e-07	0.52
21579	c17939_g1_i1	anaphase-promoting complex subunit 1	282	20	6.52247e-26	0.687
33516	c30137_g1_i1	anaphase-promoting complex subunit 1	363	20	1.04272e-50	0.826
34987	c31669_g1_i1	anaphase-promoting complex subunit 1	235	20	1.13744e-13	0.6315
43879	c40711_g1_i1	anaphase-promoting complex subunit 1	470	20	1.16382e-18	0.693
50291	c47239_g1_i1	anaphase-promoting complex subunit 1	258	9	7.61673e-09	0.6733
51318	c48293_g1_i1	anaphase-promoting complex subunit 1	329	20	3.15477e-41	0.817
62249	c59417_g1_i1	anaphase-promoting complex subunit 1	600	20	7.5917e-80	0.811
65310	c62543_g1_i1	anaphase-promoting complex subunit 1	269	20	1.87426e-21	0.705
25357	c21779_g1_i1	anaphase-promoting complex subunit 2	315	20	3.52999e-32	0.762
39661	c36389_g1_i1	anaphase-promoting complex subunit 2	297	20	2.1178e-28	0.7905
50595	c47555_g1_i1	anaphase-promoting complex subunit 2	290	20	4.12008e-17	0.701
32872	c29469_g1_i1	anaphase-promoting complex subunit 2-like	379	20	1.31071e-33	0.7495
41741	c38518_g1_i1	anaphase-promoting complex subunit 2-like	228	20	7.16679e-11	0.656
50584	c47542_g1_i1	anaphase-promoting complex subunit 4	233	20	7.47645e-10	0.5935
56730	c53788_g1_i1	anaphase-promoting complex subunit 4-like	210	20	7.76241e-15	0.7015
28600	c25132_g1_i1	anaphase-promoting complex subunit 5	1058	20	1.47368e-31	0.459
38667	c35377_g1_i1	anaphase-promoting complex subunit 5-like	543	20	1.37288e-23	0.641
45836	c42693_g1_i1	anaphase-promoting complex subunit 5-like	242	15	1.12071e-09	0.5633
63784	c60976_g1_i1	anaphase-promoting complex subunit 7	625	20	1.03561e-61	0.656
4779	c5025_g1_i1	anaphase-promoting complex subunit 7-like	461	15	7.4465e-14	0.6687
23423	c19811_g1_i1	anaphase-promoting complex subunit 7-like	234	20	1.279e-22	0.784
63898	c61091_g1_i1	anaphase-promoting complex subunit 7-like	221	20	5.52646e-14	0.6455
59587	c56717_g1_i1	ancient ubiquitous protein 1	2165	20	5.06756e-67	0.51
50989	c47966_g1_i1	and ph domain-containing protein 4-like	2890	20	0	0.6465
16220	c15248_g1_i1	and ph domain-containing protein 6	5719	20	1.95111e-169	0.6125
15990	c15146_g1_i1	and pleckstrin domain-containing protein 2	5439	20	0	0.6395
15991	c15146_g1_i2	and pleckstrin domain-containing protein 2-like isoform x1	5340	20	0	0.6585
7187	c7530_g1_i1	androgen induced inhibitor of proliferation pds5	347	20	2.34105e-26	0.904
7188	c7530_g1_i2	androgen induced inhibitor of proliferation pds5	332	20	1.77825e-26	0.9025
23121	c19504_g1_i1	androgen induced inhibitor of proliferation pds5	2699	20	0	0.7485
46419	c43281_g1_i1	androgen induced inhibitor of proliferation pds5	683	20	3.19552e-126	0.8725
27622	c24142_g1_i1	androgen-induced gene 1	354	20	5.00044e-25	0.602
3955	c4127_g1_i2	angio-associated migratory cell	898	20	1.26215e-63	0.657
28120	c24645_g1_i1	angio-associated migratory cell	269	20	2.10218e-14	0.658
42182	c38976_g1_i1	angio-associated migratory cell	300	20	3.07058e-18	0.624
25559	c21986_g1_i1	angiogenic factor with g patch and fha domains 1	520	20	1.015e-16	0.645
49795	c46721_g1_i1	angiogenic factor with g patch and fha domains 1-like	210	20	4.12978e-11	0.602
7330	c7648_g1_i1	angiomotin	4390	20	5.56935e-105	0.5475
7331	c7648_g1_i2	angiomotin	4525	20	1.43078e-131	0.5965
32181	c28757_g1_i1	angiopoietin-1 receptor	691	20	2.96258e-31	0.4825
46483	c43345_g1_i1	angiopoietin-1-like isoform x1	1370	20	1.98822e-52	0.5775
37115	c33814_g1_i1	angiopoietin-2-like isoform x1	550	20	1.69565e-18	0.543
36508	c33204_g1_i1	angiopoietin-2-like isoform x2	543	20	9.501e-20	0.623
27986	c24509_g1_i1	angiopoietin-related protein 2	4323	20	1.19858e-40	0.5155
44250	c41086_g1_i1	angiopoietin-related protein 7	1275	20	1.80399e-30	0.541
20622	c16972_g1_i1	angiotensin-converting enzyme	834	20	9.41916e-45	0.5695
29379	c25915_g1_i1	angiotensin-converting enzyme	486	20	6.65763e-65	0.707
10716	c11228_g1_i1	angiotensin-converting enzyme-like	2556	20	0	0.6885
38257	c34968_g1_i1	angiotensin-converting enzyme-like	544	20	1.03423e-41	0.6455
53784	c50771_g1_i1	anion exchange protein 2	2355	20	4.60495e-106	0.596
13748	c13839_g1_i1	ankyrin	1021	20	8.38807e-10	0.5285
3570	c3684_g1_i1	ankyrin domain protein	451	20	7.50055e-08	0.5575
22239	c18613_g1_i1	ankyrin isoform n	580	10	4.10453e-09	0.849
37104	c33802_g1_i1	ankyrin repeat	864	20	4.43508e-22	0.5155
58316	c55424_g1_i1	ankyrin repeat	205	20	2.603e-10	0.632
33448	c30066_g1_i1	ankyrin repeat and btb poz domain-containing protein 1	598	20	3.28642e-60	0.7055
60931	c58075_g1_i1	ankyrin repeat and btb poz domain-containing protein 1	352	20	5.24528e-13	0.499
61906	c59071_g1_i1	ankyrin repeat and btb poz domain-containing protein 1-like	572	20	7.84036e-68	0.7635
20089	c16434_g1_i1	ankyrin repeat and fyve domain-containing protein 1	254	20	4.49928e-23	0.802
50283	c47230_g1_i1	ankyrin repeat and fyve domain-containing protein 1	373	20	3.38387e-31	0.669
49687	c46609_g1_i1	ankyrin repeat and fyve domain-containing protein 1 isoform 1	240	10	2.06445e-06	0.593
6870	c7179_g1_i1	ankyrin repeat and mynd domain-containing protein 2-like	1440	20	1.26735e-92	0.596
117	c122_g1_i1	ankyrin repeat and sam domain-containing protein 1a-like	449	20	1.89277e-49	0.822
17459	c15650_g1_i1	ankyrin repeat and sam domain-containing protein 1a-like	4611	20	3.64055e-123	0.5745
17460	c15650_g1_i2	ankyrin repeat and sam domain-containing protein 1a-like	4990	20	1.40434e-122	0.5765
17461	c15650_g1_i3	ankyrin repeat and sam domain-containing protein 1a-like	5116	20	7.11937e-123	0.5765
27187	c23683_g1_i1	ankyrin repeat and sam domain-containing protein 3-like	296	20	3.23533e-22	0.742
23375	c19763_g1_i1	ankyrin repeat and socs box protein 13	662	20	1.90315e-36	0.596
52872	c49854_g1_i1	ankyrin repeat and socs box protein 13	344	20	4.37147e-25	0.6155
4259	c4478_g1_i1	ankyrin repeat and sterile alpha motif domain-containing protein 1b	1098	20	1.50253e-39	0.664
42573	c39390_g1_i1	ankyrin repeat and zinc finger domain-containing protein 1 isoform x2	371	20	9.61477e-23	0.666
28145	c24672_g1_i1	ankyrin repeat and zinc finger domain-containing protein 1-like	204	20	2.53516e-14	0.641
58748	c55877_g1_i1	ankyrin repeat and zinc finger domain-containing protein 1-like	299	20	7.22521e-09	0.6765
64945	c62163_g1_i1	ankyrin repeat containing	253	2	4.50742e-08	0.85
51239	c48214_g1_i1	ankyrin repeat domain-containing protein 10-like	934	20	2.87028e-50	0.666
1470	c1599_g1_i1	ankyrin repeat domain-containing protein 11-like	1380	20	2.18838e-25	0.759
1471	c1599_g1_i2	ankyrin repeat domain-containing protein 11-like	1392	20	2.26996e-25	0.759
32302	c28880_g1_i1	ankyrin repeat domain-containing protein 12	307	20	1.40573e-43	0.8035
52648	c49629_g1_i1	ankyrin repeat domain-containing protein 12	672	20	6.04e-82	0.918
16032	c15161_g1_i1	ankyrin repeat domain-containing protein 13b-like	4207	20	0	0.712
16033	c15161_g1_i2	ankyrin repeat domain-containing protein 13b-like	4067	20	0	0.712
28972	c25505_g1_i1	ankyrin repeat domain-containing protein 13c	1067	20	5.99038e-90	0.571
5337	c5578_g1_i1	ankyrin repeat domain-containing protein 16-like	1194	20	4.95805e-90	0.617
5338	c5578_g1_i2	ankyrin repeat domain-containing protein 16-like	1072	20	8.23752e-77	0.6515
17839	c15729_g1_i1	ankyrin repeat domain-containing protein 17	9879	20	0	0.8705
17840	c15729_g1_i2	ankyrin repeat domain-containing protein 17	9899	20	0	0.8705
51672	c48647_g1_i1	ankyrin repeat domain-containing protein 27	665	20	3.37896e-31	0.5285
22471	c18847_g1_i1	ankyrin repeat domain-containing protein 27-like	264	13	1.02262e-13	0.6208
37005	c33703_g1_i1	ankyrin repeat domain-containing protein 27-like	490	20	1.2973e-16	0.5595
5612	c5841_g1_i1	ankyrin repeat domain-containing protein 29-like	1146	20	7.63064e-32	0.6925
44098	c40932_g1_i1	ankyrin repeat domain-containing protein 29-like	703	20	3.482e-74	0.736
15748	c15040_g1_i2	ankyrin repeat domain-containing protein 50	5409	20	0	0.7775
15747	c15040_g1_i1	ankyrin repeat domain-containing protein 50 isoform 2	5427	20	0	0.7775
26859	c23339_g1_i1	ankyrin repeat domain-containing protein 50-like	219	2	5.07326e-06	0.66
3509	c3611_g1_i1	ankyrin repeat family a protein 2-like	582	20	8.92051e-21	0.585
3510	c3611_g1_i2	ankyrin repeat family a protein 2-like	439	20	2.45927e-21	0.587
29247	c25780_g1_i1	ankyrin repeat protein	269	20	1.44018e-09	0.599
31569	c28131_g1_i1	ankyrin repeat protein	847	20	1.90805e-17	0.466
39511	c36237_g1_i1	ankyrin repeat protein	805	20	2.89725e-31	0.519
42258	c39060_g1_i1	ankyrin repeat protein	253	20	2.08333e-16	0.658
46650	c43518_g1_i1	ankyrin repeat protein	364	10	1.35359e-07	0.514
48380	c45280_g1_i1	ankyrin repeat protein	207	20	1.84751e-10	0.691
53914	c50903_g1_i1	ankyrin repeat protein	228	20	3.48063e-10	0.649
54469	c51467_g1_i1	ankyrin repeat protein	1000	20	5.11752e-43	0.534
8583	c8999_g1_i1	ankyrin repeat-containing	5005	20	7.70523e-59	0.681
8584	c8999_g1_i2	ankyrin repeat-containing	4801	20	1.22326e-57	0.702
12657	c12994_g2_i1	ankyrin repeat-containing	2535	20	1.67284e-51	0.5945
22432	c18808_g1_i1	ankyrin repeat-containing	1259	20	5.90937e-44	0.4875
28779	c25311_g1_i1	ankyrin repeat-containing	907	13	1.98513e-08	0.7008
29293	c25826_g1_i1	ankyrin repeat-containing	442	3	3.12527e-08	0.4933
22716	c19096_g1_i1	ankyrin repeat-containing protein	299	2	5.89321e-09	0.575
36201	c32895_g1_i1	ankyrin repeat-containing protein	593	20	5.72183e-13	0.6235
60618	c57755_g1_i1	ankyrin sam and basic leucine zipper domain-containing protein 1	921	20	1.48533e-83	0.541
15797	c15061_g1_i1	ankyrin unc44	16546	20	0	0.8415
15798	c15061_g1_i2	ankyrin unc44	15052	20	0	0.8325
15799	c15061_g1_i3	ankyrin unc44	16612	20	0	0.8315
15800	c15061_g1_i4	ankyrin unc44	16630	20	0	0.8325
15801	c15061_g1_i5	ankyrin unc44	16570	20	0	0.831
19306	c15953_g1_i1	ankyrin unc44	566	20	5.30373e-51	0.571
19309	c15953_g1_i2	ankyrin unc44	567	20	5.94734e-24	0.533
19486	c15978_g1_i3	ankyrin unc44	561	20	1.69471e-13	0.6315
27820	c24341_g1_i1	ankyrin unc44	3054	20	3.3106e-41	0.551
54080	c51071_g1_i1	ankyrin unc44	642	20	5.495e-28	0.6145
11379	c11835_g1_i4	annexin a11	546	20	3.28341e-14	0.7575
11376	c11835_g1_i1	annexin b11 isoform a	1721	20	3.61308e-107	0.69
11377	c11835_g1_i2	annexin b11 isoform a	1757	20	4.11145e-102	0.6665
11378	c11835_g1_i3	annexin b11 isoform a	1265	20	2.55248e-101	0.6615
28172	c24699_g1_i1	annulin-like isoform 1	457	20	5.87329e-73	0.802
40283	c37024_g1_i1	annulin-like isoform 1	236	20	2.0256e-13	0.5985
22149	c18519_g1_i1	annulin-like isoform 2	893	20	1.48542e-43	0.602
31422	c27985_g1_i1	annulin-like isoform 2	583	20	1.00619e-15	0.554
1468	c1597_g1_i1	anoctamin-7-like	4395	20	0	0.757
12841	c13127_g1_i1	anoctamin-8-like isoform 1	4205	20	0	0.6845
12842	c13127_g1_i2	anoctamin-8-like isoform 2	4127	20	0	0.68
7734	c8056_g1_i1	anopheles gambiae pest agap012477-pa	1624	20	4.38554e-114	0.601
7735	c8056_g1_i2	anopheles gambiae pest agap012477-pa	1979	20	1.30191e-114	0.5995
7736	c8056_g1_i3	anopheles gambiae pest agap012477-pa	1634	20	8.87273e-114	0.6015
4711	c4956_g1_i1	anopheles gambiae pest agap012507-pa	1037	20	3.34217e-34	0.553
59983	c57117_g1_i1	anopheles gambiae pest agap012622-pa	511	20	1.63416e-15	0.68
36172	c32866_g1_i1	anopheles stephensi ubiquitin	517	20	2.29411e-87	0.9745
41922	c38703_g1_i1	another transcription unit	500	20	9.72658e-54	0.9105
28569	c25101_g1_i1	antigen ki-67	1196	20	1.09543e-28	0.6065
822	c838_g1_i1	anti-lipopolysaccharide factor	631	20	3.46278e-22	0.644
3866	c4031_g1_i1	anti-lipopolysaccharide factor	1204	20	1.3412e-28	0.6055
4534	c4770_g1_i1	anti-lipopolysaccharide factor	1087	20	4.62402e-42	0.7535
19320	c15956_g2_i1	anti-lipopolysaccharide factor	1301	9	9.46924e-08	0.8833
36271	c32967_g1_i1	anti-lipopolysaccharide factor	795	20	1.64448e-44	0.7765
42347	c39153_g1_i1	anti-lipopolysaccharide factor	227	20	2.77447e-22	0.5975
43961	c40793_g1_i1	anti-lipopolysaccharide factor	272	20	6.03983e-23	0.7315
44951	c41792_g1_i1	anti-lipopolysaccharide factor	469	20	7.94611e-44	0.759
51606	c48580_g1_i1	anti-lipopolysaccharide factor	771	20	4.04831e-46	0.7775
53690	c50676_g1_i1	anti-lipopolysaccharide factor	319	20	7.88556e-36	0.7915
58151	c55255_g1_i1	anti-lipopolysaccharide factor	232	20	1.89698e-35	0.819
28184	c24711_g1_i1	antimicrobial peptide type 2 precursor iic	550	3	1.72643e-08	0.59
13765	c13851_g3_i1	antiviral protein	967	20	4.52645e-22	0.481
15062	c14674_g1_i1	antiviral protein	907	20	1.4867e-36	0.57
15063	c14674_g2_i1	antiviral protein	775	20	2.29335e-36	0.557
12597	c12944_g1_i1	ap-1 complex subunit gamma-1	5201	20	0	0.7365
12598	c12944_g1_i2	ap-1 complex subunit gamma-1	5061	20	0	0.7385
6896	c7209_g1_i1	ap-1 complex subunit mu-1-like	2110	20	0	0.9405
7586	c7875_g1_i1	ap-1 complex subunit sigma-2-like	527	20	2.45241e-103	0.9515
7587	c7875_g1_i2	ap-1 complex subunit sigma-2-like	1086	20	3.35724e-98	0.9485
16493	c15356_g1_i1	ap-2 complex subunit alpha-like	5695	20	0	0.856
16494	c15356_g1_i2	ap-2 complex subunit alpha-like	5740	20	0	0.848
10341	c10886_g1_i1	ap-2 complex subunit beta-like	1367	20	3.83246e-108	0.727
10342	c10886_g1_i2	ap-2 complex subunit beta-like	1385	20	1.2383e-106	0.7125
52466	c49447_g1_i1	ap-2 complex subunit beta-like	1971	20	0	0.957
46388	c43250_g1_i1	ap-2 complex subunit sigma-like	1467	20	7.38897e-91	0.9535
8144	c8463_g1_i2	ap2 erf domain-containing protein pfd0985w-like isoform x4	1809	20	1.91579e-91	0.566
21150	c17504_g1_i1	ap2-associated protein kinase 1	929	20	2.75585e-14	0.5585
34529	c31184_g1_i1	ap2-associated protein kinase 1	308	17	1.71742e-15	0.7641
25462	c21888_g1_i1	ap-3 complex subunit beta-1-like	249	20	1.69566e-35	0.8685
20840	c17189_g1_i1	ap-3 complex subunit beta-2	261	20	3.3388e-36	0.867
53985	c50976_g1_i1	ap-3 complex subunit beta-2	385	20	1.20643e-48	0.803
29259	c25792_g1_i1	ap-3 complex subunit beta-2 isoform x3	744	20	1.53002e-62	0.6895
59013	c56143_g1_i1	ap-3 complex subunit delta-1	1029	20	0	0.951
43977	c40809_g1_i1	ap-3 complex subunit delta-1-like isoform x2	3118	20	2.0212e-165	0.7395
7640	c7937_g1_i1	ap-3 complex subunit mu-1	1420	20	0	0.897
11466	c11914_g1_i1	ap-3 complex subunit sigma-2-like	743	20	2.51599e-77	0.953
11467	c11914_g1_i2	ap-3 complex subunit sigma-2-like	835	20	8.2939e-120	0.955
11468	c11914_g1_i3	ap-3 complex subunit sigma-2-like	914	20	1.32608e-104	0.9575
41127	c37882_g1_i1	ap-4 complex accessory subunit tepsin	533	20	2.01713e-24	0.6105
29733	c26269_g1_i1	ap-4 complex subunit beta-1	1078	20	4.17277e-41	0.552
31846	c28414_g1_i1	ap-4 complex subunit epsilon-1	616	20	2.34902e-17	0.5145
2054	c2130_g1_i1	ap-4 complex subunit mu-1-like	1544	20	3.24316e-42	0.474
2055	c2130_g1_i2	ap-4 complex subunit mu-1-like	1623	20	4.518e-42	0.474
28288	c24817_g1_i1	ap-4 complex subunit sigma-1	963	20	1.49833e-23	0.601
43647	c40481_g1_i1	apical endosomal glycoprotein	415	20	1.10183e-14	0.4845
1126	c1169_g1_i1	ap-like endonuclease reverse transcriptase	339	20	7.98648e-13	0.522
17365	c15621_g1_i1	ap-like endonuclease reverse transcriptase	1619	20	3.61137e-34	0.423
18966	c15913_g1_i1	ap-like endonuclease reverse transcriptase	2233	20	6.11529e-33	0.473
18967	c15913_g1_i2	ap-like endonuclease reverse transcriptase	2426	20	5.03054e-46	0.4625
18968	c15913_g1_i3	ap-like endonuclease reverse transcriptase	348	13	3.21434e-09	0.5346
19455	c15972_g2_i1	ap-like endonuclease reverse transcriptase	4003	20	7.88702e-33	0.5465
2810	c2892_g1_i1	aplp_manse ame: full=apolipophorins contains: ame: full=apolipophorin-2 ame: full=apolipophorin ii ame: full=apolp-2 contains: ame: full=apolipophorin-1 ame: full=apolipophorin i ame: full=apolp-1 flags: precursor	4800	20	1.6611e-22	0.4055
2586	c2687_g1_i1	apolipophorins isoform 1	5954	20	1.79867e-21	0.448
54374	c51370_g1_i1	apolipophorins- partial	780	20	3.37902e-41	0.519
46637	c43504_g1_i1	apolipophorins-like isoform x3	1003	20	3.05507e-44	0.4825
3473	c3565_g1_i1	apolipoprotein d	884	20	1.01631e-26	0.573
3474	c3565_g1_i2	apolipoprotein d	991	20	1.37336e-26	0.5725
4331	c4545_g1_i1	apolipoprotein d	3231	20	7.01421e-22	0.495
4332	c4545_g1_i2	apolipoprotein d	3120	20	4.90269e-20	0.494
7677	c7987_g1_i1	apolipoprotein d	1758	20	2.68399e-42	0.5465
15853	c15085_g1_i1	apolipoprotein d	1246	20	8.75108e-47	0.531
15854	c15085_g1_i2	apolipoprotein d	1264	20	9.63388e-47	0.544
25790	c22226_g1_i1	apolipoprotein d	328	20	4.27775e-13	0.5515
156	c156_g1_i1	apolipoprotein d-like	1063	20	1.46096e-33	0.5495
63818	c61010_g1_i1	apolipoprotein d-like	222	18	9.07405e-09	0.6039
28141	c24669_g1_i1	apolipoprotein of lipid transfer particle-i ii	741	20	6.96036e-22	0.4775
28860	c25392_g1_i1	apolipoprotein of lipid transfer particle-i ii	487	20	5.60562e-18	0.4985
51222	c48197_g1_i1	apolipoprotein of lipid transfer particle-i ii	375	20	2.17373e-16	0.6275
9647	c10168_g2_i1	apolipoprotein o-like	1471	20	1.79355e-31	0.539
8066	c8381_g1_i1	apoptogenic protein mitochondrial	865	20	3.08885e-32	0.6035
8068	c8381_g1_i3	apoptogenic protein mitochondrial	907	20	2.92048e-32	0.639
8067	c8381_g1_i2	apoptogenic protein mitochondrial-like	578	20	1.68013e-14	0.697
24280	c20685_g1_i1	apoptosis inhibitor 5	346	20	6.31679e-35	0.658
27350	c23851_g1_i1	apoptosis inhibitor 5 isoform x3	240	20	2.74551e-33	0.717
56970	c54031_g1_i1	apoptosis regulator bax	213	1	1.42605e-07	0.77
60216	c57353_g1_i1	apoptosis regulator r1-like	721	20	1.19406e-19	0.5745
9637	c10163_g1_i1	apoptosis stimulating of	776	20	5.91531e-67	0.867
9639	c10163_g1_i3	apoptosis stimulating of	480	20	4.10589e-65	0.858
37600	c34303_g1_i1	apoptosis stimulating of	2214	20	6.20915e-44	0.629
54222	c51216_g1_i1	apoptosis stimulating of p53	335	20	1.71132e-15	0.9275
4493	c4724_g1_i2	apoptosis-inducing factor 3-like	519	20	4.02173e-16	0.6945
26774	c23250_g1_i1	apoptosis-inducing factor 3-like isoform x2	383	20	4.22632e-47	0.7495
61283	c58431_g1_i1	apoptosis-inducing factor 3-like isoform x2	371	20	2.14586e-21	0.651
51091	c48066_g1_i1	apoptosis-inducing factor mitochondrial-like	2344	20	0	0.7715
43752	c40584_g1_i1	apoptosis-linked protein 2	1520	20	5.81684e-66	0.744
16724	c15449_g1_i1	apoptotic chromatin condensation inducer in the nucleus	9026	20	2.70174e-45	0.578
4661	c4907_g1_i1	apoptotic chromatin condensation inducer in the nucleus-like	1844	20	3.82033e-14	0.5995
30751	c27303_g1_i1	apoptotic cysteine	424	20	5.12111e-31	0.6235
49526	c46446_g1_i1	aprataxin and pnk-like factor	230	20	3.1467e-07	0.658
3327	c3390_g1_i1	aprataxin isoform x1	545	20	5.62648e-26	0.682
3328	c3390_g1_i2	aprataxin isoform x4	679	20	5.96419e-68	0.6855
11415	c11873_g1_i1	apurinic apyrimidinic endonuclease 1	2434	20	4.63896e-119	0.7435
7651	c7959_g1_i1	aquaporin 3-like	1126	20	7.20244e-58	0.6335
624	c618_g1_i1	aquaporin transporter	5732	20	1.73316e-65	0.569
60053	c57187_g1_i1	aquaporin-9 isoform x2	668	20	4.05649e-17	0.7045
10131	c10680_g1_i1	arf gtpase-activating protein git2 isoform 7	1393	20	3.73134e-34	0.853
10133	c10680_g1_i3	arf gtpase-activating protein git2 isoform 7	1336	20	2.99584e-34	0.853
47502	c44383_g1_i1	arf gtpase-activating protein git2-like	300	20	8.68618e-39	0.7755
43383	c40218_g1_i1	arf gtpase-activating protein git2-like isoform x5	518	20	9.56168e-32	0.727
36107	c32802_g1_i1	arfaptin-2- partial	747	20	1.02598e-51	0.862
7218	c7551_g1_i1	arfaptin-2-like protein	1234	20	1.93776e-93	0.8725
28108	c24632_g1_i1	arf-gap with coiled- ank repeat and ph domain-containing protein 2	1107	20	2.60116e-46	0.559
59846	c56977_g1_i1	arf-gap with coiled- ank repeat and ph domain-containing protein 2-like	1594	20	1.33149e-153	0.6635
28771	c25303_g1_i1	arf-gap with dual ph domain-containing protein 1-like	1396	20	0	0.706
1715	c1820_g1_i1	arf-gap with sh3 ank repeat and ph domain-containing protein 1-like	400	20	1.87653e-37	0.7165
29223	c25756_g1_i1	arf-gap with sh3 ank repeat and ph domain-containing protein 1-like	298	20	2.92637e-18	0.776
31341	c27902_g1_i1	arf-gap with sh3 ank repeat and ph domain-containing protein 1-like	371	20	3.04773e-21	0.699
34127	c30768_g1_i1	arf-gap with sh3 ank repeat and ph domain-containing protein 1-like	216	20	1.92798e-23	0.7555
59444	c56575_g1_i1	arf-gap with sh3 ank repeat and ph domain-containing protein 1-like	2188	20	9.17074e-108	0.6085
49647	c46568_g1_i1	arginase- mitochondrial-like	339	20	6.43414e-31	0.677
52841	c49823_g1_i1	arginase- mitochondrial-like	329	20	1.20717e-30	0.692
20415	c16761_g1_i1	arginine kinase	1412	20	0	0.967
41638	c38411_g1_i1	arginine methyltransferase 8	287	9	1.06194e-09	0.6533
11998	c12438_g1_i1	arginine serine-rich	4694	20	1.68319e-20	0.7525
44961	c41802_g1_i1	arginine serine-rich coiled-coil 1	1059	10	5.30895e-09	0.55
31920	c28489_g1_i1	arginine serine-rich coiled-coil protein 2	1151	20	5.04914e-13	0.8485
43605	c40439_g1_i1	arginine serine-rich coiled-coil protein 2-like	704	20	4.747e-13	0.4855
21055	c17408_g1_i1	arginine serine-rich splicing	311	20	4.28868e-20	0.898
230	c221_g1_i1	arginine serine-rich-splicing factor	749	20	1.84786e-12	0.582
7718	c8038_g1_i2	arginine-glutamic acid dipeptide repeats protein	553	20	1.40627e-16	0.9355
7719	c8038_g1_i3	arginine-glutamic acid dipeptide repeats protein	241	20	1.41174e-17	0.9355
21024	c17376_g1_i1	arginine-glutamic acid dipeptide repeats protein	492	20	1.39253e-69	0.8615
46609	c43476_g1_i1	arginine-glutamic acid dipeptide repeats protein	742	20	4.20475e-68	0.775
4561	c4796_g1_i1	arginine--trna cytoplasmic-like	2084	20	0	0.7395
14672	c14451_g3_i1	argininosuccinate lyase	4373	20	0	0.744
62446	c59617_g1_i1	arginyl-trna synthetase	1549	20	2.36459e-84	0.671
58107	c55209_g1_i1	arginyl-trna--protein transferase 1	368	20	2.6691e-45	0.7915
39995	c36733_g1_i1	arginyl-trna--protein transferase 1 isoform x2	286	20	9.76291e-15	0.646
1321	c1410_g1_i1	argonaute 1	817	20	7.56521e-93	0.949
35216	c31914_g1_i1	argonaute 1	928	20	0	0.968
41727	c38504_g1_i1	argonaute 1	452	20	2.11677e-104	0.9845
35268	c31965_g1_i1	argonaute-1	843	20	0	0.9205
18356	c15817_g1_i2	arl14 effector protein	952	20	1.42657e-27	0.6055
31757	c28321_g1_i1	arm repeat-containing protein	520	20	9.00625e-47	0.621
62730	c59905_g1_i1	armadillo repeat-containing	649	7	2.90009e-33	0.5857
32598	c29186_g1_i1	armadillo repeat-containing protein 1	402	20	5.96038e-25	0.582
55502	c52525_g1_i1	armadillo repeat-containing protein 5	396	20	2.17128e-09	0.4885
21717	c18078_g1_i1	armadillo repeat-containing protein 6	1640	20	1.39828e-97	0.574
52620	c49601_g1_i1	armadillo repeat-containing protein 7	579	20	4.71671e-58	0.707
22453	c18829_g1_i1	armadillo repeat-containing protein 8	379	8	1.88583e-08	0.5075
51804	c48777_g1_i1	armadillo repeat-containing protein 8	375	20	1.11857e-54	0.809
28657	c25189_g1_i1	armadillo repeat-containing protein 8 isoform x2	474	20	4.73384e-69	0.8195
7687	c8004_g1_i1	armadillo segment polarity	4809	20	0	0.845
21003	c17355_g1_i1	armadillo type fold	1389	20	7.86657e-173	0.6105
12750	c13071_g1_i1	armet-like protein precursor	1209	20	4.24735e-55	0.791
13290	c13471_g1_i1	arp2 3 complex 16 kd	2161	20	1.77123e-50	0.7235
20484	c16832_g1_i1	arp6 actin-related protein 6 homolog	341	20	2.08287e-45	0.7695
30808	c27361_g1_i1	arrestin domain containing protein	811	20	3.74291e-17	0.455
44656	c41493_g1_i1	arrestin domain-containing protein 3	475	20	1.70759e-18	0.4865
60447	c57583_g1_i1	arrestin domain-containing protein 3	375	20	2.6559e-10	0.636
60541	c57678_g1_i1	arrestin domain-containing protein 3-like	569	20	5.74521e-43	0.552
57415	c54497_g1_i1	artemis	238	20	1.02896e-21	0.754
29815	c26352_g1_i1	arthrodial cuticle protein	1026	20	8.78135e-35	0.6335
30622	c27170_g1_i1	arthrodial cuticle protein	633	7	8.84561e-17	0.72
11965	c12405_g1_i2	arylalkylamine n-acetyltransferase 3	2204	20	3.38067e-15	0.487
7580	c7867_g1_i1	arylsulfatase b	1983	20	3.93259e-46	0.695
26290	c22745_g1_i1	arylsulfatase b	389	20	2.17161e-46	0.859
20575	c16925_g1_i1	arylsulfatase d-like	1638	20	7.85775e-52	0.514
39252	c35974_g1_i1	arylsulfatase e	647	20	1.19069e-29	0.8455
20858	c17207_g1_i1	arylsulfatase i-like	846	20	1.52866e-19	0.5005
18841	c15898_g8_i1	arylsulfatase j-like	1841	20	4.3565e-156	0.6605
2243	c2333_g1_i1	asialoglycoprotein receptor 2	828	20	7.59691e-49	0.5375
10344	c10892_g1_i1	asparaginase	1391	20	1.33905e-40	0.602
62768	c59943_g1_i1	asparagine synthetase domain-containing partial	245	20	6.17571e-14	0.636
6287	c6575_g1_i1	asparagine synthetase domain-containing protein 1	953	20	9.55418e-71	0.7495
6288	c6575_g1_i2	asparagine synthetase domain-containing protein 1	691	20	1.11227e-76	0.747
10141	c10689_g1_i1	asparaginyl-trna cytoplasmic-like	1373	20	0	0.844
1897	c1992_g1_i1	aspartate beta-hydroxylase domain-containing protein 2	638	20	9.59204e-32	0.605
37322	c34023_g1_i1	aspartate beta-hydroxylase domain-containing protein 2	895	20	6.80823e-17	0.448
19775	c16124_g1_i1	aspartate mitochondrial	2166	20	0	0.839
19776	c16124_g1_i2	aspartate mitochondrial	3198	20	0	0.839
64706	c61918_g1_i1	aspartate--trna cytoplasmic-like	395	3	4.37089e-07	0.63
22490	c18867_g1_i1	aspartate--trna mitochondrial	373	20	3.15005e-10	0.7675
44919	c41760_g1_i1	aspartate--trna mitochondrial	628	20	2.80535e-74	0.7135
35650	c32345_g1_i1	aspartate--trna mitochondrial isoform x2	297	20	3.46433e-13	0.6735
12157	c12566_g1_i1	aspartyl asparaginyl beta-hydroxylase	5149	20	5.71494e-158	0.658
12158	c12566_g1_i2	aspartyl asparaginyl beta-hydroxylase	5081	20	1.48187e-157	0.675
35115	c31803_g1_i1	aspartyl-trna synthetase	203	20	4.68749e-21	0.7955
45038	c41879_g1_i1	aspartyl-trna synthetase	1365	20	0	0.8365
20296	c16642_g1_i1	astakine variant 1	1132	12	1.53973e-18	0.6158
32039	c28610_g1_i1	astakine variant 2	532	20	2.83771e-19	0.5395
36256	c32952_g1_i1	asx	703	20	2.14477e-57	0.7085
57723	c54814_g1_i1	atad3a protein	380	20	1.30344e-46	0.747
22439	c18815_g1_i1	ataxin-1 isoform x2	421	20	2.61859e-25	0.673
31627	c28190_g1_i1	ataxin-10	349	20	2.73704e-18	0.694
43219	c40052_g1_i1	ataxin-2-like protein	1707	20	2.92826e-70	0.627
2059	c2135_g1_i1	ataxin-3 isoform x2	868	20	6.67053e-87	0.676
36049	c32744_g1_i1	ataxin-7-like protein 3 isoform x1	1597	20	1.05088e-15	0.662
5892	c6110_g1_i1	ataxin-7-like protein 3-like	1040	20	1.51426e-31	0.7055
5893	c6110_g1_i2	ataxin-7-like protein 3-like	907	20	2.944e-27	0.752
5492	c5725_g1_i1	atlastin-like isoform x1	1244	20	2.97049e-131	0.695
43541	c40375_g1_i1	atlastin-like isoform x1	1024	20	3.32019e-36	0.7145
30744	c27296_g1_i1	atp synthase	1100	20	1.33593e-97	0.736
58744	c55873_g1_i1	atp synthase	2112	20	0	0.9165
40023	c36761_g1_i1	atp synthase beta	621	20	3.57281e-67	0.889
2611	c2710_g1_i1	atp synthase delta mitochondrial	1020	20	2.30797e-71	0.8035
1677	c1778_g1_i1	atp synthase e chain	406	20	2.60648e-27	0.701
31560	c28122_g1_i1	atp synthase lipid-binding mitochondrial	793	20	1.10975e-26	0.862
24717	c21131_g1_i1	atp synthase mitochondrial f1 complex assembly factor 1	1067	20	9.6829e-77	0.6485
8007	c8333_g1_i1	atp synthase mitochondrial f1 complex assembly factor 2	243	20	1.01593e-10	0.692
8008	c8333_g1_i2	atp synthase mitochondrial f1 complex assembly factor 2	305	20	1.93263e-10	0.6865
8009	c8333_g1_i3	atp synthase mitochondrial f1 complex assembly factor 2	231	20	8.90445e-11	0.6895
43045	c39881_g1_i1	atp synthase mitochondrial f1 complex assembly factor 2-like	630	20	3.93192e-54	0.654
57934	c55031_g1_i1	atp synthase subunit d	247	20	2.59803e-22	0.834
6162	c6408_g1_i1	atp synthase subunit mitochondrial	386	20	2.69614e-35	0.71
46274	c43136_g1_i1	atp synthase subunit mitochondrial	342	20	2.22911e-24	0.731
39267	c35989_g1_i1	atp synthase subunit mitochondrial-like	601	20	1.88716e-49	0.72
39258	c35980_g1_i1	atp synthase subunit s-like protein	1210	20	5.52609e-39	0.5875
2369	c2458_g1_i1	atpase asna1	323	20	1.11959e-11	0.7965
2370	c2458_g1_i2	atpase asna1	254	20	5.68305e-12	0.7965
2371	c2458_g1_i3	atpase asna1	296	20	8.69623e-12	0.7965
18217	c15797_g5_i1	atpase asna1 homolog	1823	20	4.51904e-175	0.8725
18223	c15797_g5_i5	atpase asna1 homolog	2198	20	2.70392e-173	0.8725
6525	c6816_g1_i1	atpase family aaa domain-containing protein 1-a-like	1832	20	5.92255e-138	0.738
6526	c6816_g1_i2	atpase family aaa domain-containing protein 1-a-like	1794	20	4.0606e-138	0.738
31239	c27797_g1_i1	atpase family aaa domain-containing protein 1-a-like	291	20	1.20098e-43	0.782
39734	c36465_g1_i1	atpase family aaa domain-containing protein 2	956	20	4.93984e-28	0.585
22817	c19197_g1_i1	atpase family aaa domain-containing protein 2b	404	20	1.3874e-21	0.7725
38166	c34876_g1_i1	atpase family aaa domain-containing protein 2b	290	20	2.53246e-41	0.83
63663	c60853_g1_i1	atpase family aaa domain-containing protein 2b	372	20	1.16671e-22	0.501
5919	c6136_g1_i1	atpase family aaa domain-containing protein 3	646	20	7.61179e-73	0.756
31195	c27753_g1_i1	atpase family aaa domain-containing protein 5	307	20	6.90682e-15	0.6575
23961	c20361_g1_i1	atpase inhibitor mai- mitochondrial-like	518	20	1.61426e-20	0.798
8108	c8429_g1_i1	atpase inhibitor-like	690	17	1.24939e-23	0.7018
42135	c38926_g1_i1	atpase n2b	326	20	1.673e-38	0.785
46603	c43470_g1_i1	atpase n2b	367	20	8.83578e-50	0.7955
49395	c46313_g1_i1	atpase n2b-like	502	20	1.42502e-26	0.607
65478	c62718_g1_i1	atpase n2b-like	229	20	1.40477e-09	0.569
49419	c46337_g1_i1	atpase swsap1-like	287	7	5.3812e-10	0.5271
59581	c56711_g1_i1	atp-binding cassette	268	3	2.3567e-09	0.59
34416	c31067_g1_i1	atp-binding cassette sub-family a member 2-like	230	20	4.49886e-20	0.766
50605	c47565_g1_i1	atp-binding cassette sub-family a member 2-like	204	17	3.00242e-07	0.6071
64487	c61697_g1_i1	atp-binding cassette sub-family a member 2-like	590	20	3.85407e-27	0.6155
44079	c40913_g1_i1	atp-binding cassette sub-family a member 3	2007	20	7.50671e-141	0.634
6751	c7061_g1_i1	atp-binding cassette sub-family a member 3-like	2570	20	0	0.63
6752	c7061_g1_i2	atp-binding cassette sub-family a member 3-like	2507	20	0	0.6435
43797	c40629_g1_i1	atp-binding cassette sub-family a member 3-like	1159	20	1.63119e-60	0.552
60388	c57524_g1_i1	atp-binding cassette sub-family a member 3-like	524	20	4.79099e-58	0.72
2523	c2620_g1_i1	atp-binding cassette sub-family a member 5-like isoform 1	443	2	7.09958e-06	0.78
33271	c29880_g1_i1	atp-binding cassette sub-family b member 7	227	20	3.97262e-16	0.839
43582	c40416_g1_i1	atp-binding cassette sub-family b member 7	625	20	5.39446e-78	0.8355
50677	c47641_g1_i1	atp-binding cassette sub-family b member mitochondrial	204	20	3.64004e-19	0.765
20390	c16736_g1_i1	atp-binding cassette sub-family b member mitochondrial-like	648	20	7.92291e-94	0.8645
42466	c39275_g1_i1	atp-binding cassette sub-family b member mitochondrial-like	215	20	3.79038e-24	0.8255
51515	c48489_g1_i1	atp-binding cassette sub-family b member mitochondrial-like	367	20	1.0452e-28	0.8165
62986	c60164_g1_i1	atp-binding cassette sub-family b member mitochondrial-like	420	20	3.4959e-55	0.8225
25911	c22352_g1_i1	atp-binding cassette sub-family c member 9-like	395	20	4.53204e-15	0.6525
63285	c60472_g1_i1	atp-binding cassette sub-family c member 9-like	533	20	4.47346e-47	0.726
35765	c32461_g1_i1	atp-binding cassette sub-family c member sur-like	620	20	1.14782e-43	0.7115
64000	c61195_g1_i1	atp-binding cassette sub-family c member sur-like	214	20	2.38482e-14	0.6975
15994	c15148_g1_i2	atp-binding cassette sub-family d member 2 isoform x1	3232	20	0	0.7225
29029	c25563_g1_i1	atp-binding cassette sub-family d member 3 isoform x1	2576	20	0	0.779
19884	c16230_g1_i1	atp-binding cassette sub-family d member 4	451	20	8.53738e-25	0.635
64558	c61768_g1_i1	atp-binding cassette sub-family d member 4	395	20	2.75152e-51	0.775
43649	c40483_g1_i1	atp-binding cassette sub-family e member 1	2361	20	0	0.8865
21361	c17720_g1_i1	atp-binding cassette sub-family f member 1-like	2099	20	0	0.858
17018	c15545_g1_i1	atp-binding cassette sub-family f member 2-like	3138	20	0	0.886
17019	c15545_g1_i2	atp-binding cassette sub-family f member 2-like	3182	20	0	0.886
2604	c2703_g1_i1	atp-binding cassette sub-family f member 3-like	2503	20	0	0.777
13891	c13942_g1_i1	atp-binding cassette sub-family g member 4	2790	20	0	0.742
13892	c13942_g1_i2	atp-binding cassette sub-family g member 4	3744	20	0	0.7405
13893	c13942_g1_i3	atp-binding cassette sub-family g member 4	3719	20	0	0.7405
59209	c56340_g1_i1	atp-binding cassette sub-family g member 5-like	382	20	3.06236e-50	0.73
35403	c32097_g1_i1	atp-binding cassette transporter sub-family c member 9	262	20	9.25328e-11	0.606
15892	c15104_g1_i1	atp-citrate synthase	5415	20	0	0.8345
15893	c15104_g1_i2	atp-citrate synthase	5380	20	0	0.8345
60929	c58073_g1_i1	atp-dependent clp protease atp-binding subunit	225	20	2.15059e-34	0.942
51032	c48008_g1_i1	atp-dependent clp protease atp-binding subunit clpx- mitochondrial isoform x2	1307	20	2.54701e-107	0.7265
31115	c27673_g1_i1	atp-dependent clp protease atp-binding subunit clpx- mitochondrial-like	1006	20	3.04531e-70	0.821
14200	c14140_g1_i1	atp-dependent clp protease proteolytic mitochondrial-like	999	20	3.23129e-111	0.8565
25110	c21528_g1_i1	atp-dependent dna helicase pif1	237	20	8.67943e-17	0.634
50363	c47312_g1_i1	atp-dependent dna helicase pif1	241	20	1.95999e-22	0.72
42576	c39393_g1_i1	atp-dependent dna helicase pif1-like	220	20	8.58384e-32	0.8995
64355	c61560_g1_i1	atp-dependent dna helicase q1	242	20	2.7508e-14	0.6835
29195	c25728_g1_i1	atp-dependent dna helicase q1-like	459	20	1.20829e-56	0.735
53852	c50840_g1_i1	atp-dependent dna helicase q4	379	20	3.47668e-46	0.7555
27171	c23664_g1_i1	atp-dependent dna helicase q4-like	433	20	1.0515e-62	0.781
48553	c45456_g1_i1	atp-dependent dna helicase q4-like	252	20	5.68345e-24	0.6965
38081	c34791_g1_i1	atp-dependent dna helicase q5	360	20	3.59857e-16	0.567
15135	c14720_g2_i1	atp-dependent helicase brm	3159	20	0	0.8285
15136	c14720_g2_i2	atp-dependent helicase brm	3144	20	0	0.8315
15137	c14720_g3_i1	atp-dependent helicase brm	1805	20	0	0.793
28271	c24800_g1_i1	atp-dependent helicase brm	848	20	3.15455e-80	0.74
5071	c5335_g1_i1	atp-dependent helicase brm-like	2417	20	5.42991e-104	0.744
15138	c14720_g3_i2	atp-dependent helicase brm-like	1662	20	0	0.795
21487	c17847_g1_i1	atp-dependent helicase brm-like	655	20	3.66632e-130	0.914
43237	c40071_g1_i1	atp-dependent -nad h-hydrate dehydratase-like isoform x2	1362	20	4.608e-97	0.6625
2881	c2959_g1_i2	atp-dependent protease la	1570	20	0	0.836
52056	c49033_g1_i1	atp-dependent protease la	471	20	1.47958e-21	0.826
40067	c36805_g1_i1	atp-dependent rna	241	1	4.80255e-08	0.67
20178	c16523_g1_i1	atpdependent rna helicase	396	20	8.43723e-50	0.7335
51998	c48974_g1_i1	atp-dependent rna helicase	540	8	1.04512e-06	0.6475
31773	c28338_g1_i1	atp-dependent rna helicase a	335	20	5.28408e-42	0.8065
58897	c56027_g1_i1	atp-dependent rna helicase a	340	20	5.00263e-39	0.752
3059	c3129_g1_i1	atp-dependent rna helicase abstrakt	932	20	9.35112e-48	0.7665
14652	c14437_g1_i1	atp-dependent rna helicase abstrakt-like	2102	20	0	0.851
50265	c47212_g1_i1	atp-dependent rna helicase a-like	229	20	5.55463e-17	0.842
51788	c48761_g1_i1	atp-dependent rna helicase a-like protein	674	20	2.13436e-48	0.667
51879	c48853_g1_i1	atp-dependent rna helicase dbp6	226	20	1.00179e-19	0.807
11639	c12103_g1_i1	atp-dependent rna helicase ddx1-like	2868	20	0	0.8065
6174	c6422_g1_i1	atp-dependent rna helicase ddx24-like	2384	20	0	0.637
1936	c2027_g1_i2	atp-dependent rna helicase ddx39a	1738	20	5.94218e-132	0.944
1935	c2027_g1_i1	atp-dependent rna helicase ddx39a-like	1758	20	0	0.955
16663	c15424_g1_i5	atp-dependent rna helicase ddx3x	5592	20	0	0.7925
5031	c5289_g1_i1	atp-dependent rna helicase ddx42-like	3047	20	0	0.765
5032	c5289_g1_i2	atp-dependent rna helicase ddx42-like	3131	20	0	0.765
1671	c1772_g1_i1	atp-dependent rna helicase ddx46-like partial	269	20	2.53713e-43	0.94
1704	c1808_g1_i1	atp-dependent rna helicase ddx51-like	475	20	1.46291e-33	0.664
43196	c40029_g1_i1	atp-dependent rna helicase ddx54	437	20	7.6807e-48	0.866
7406	c7716_g1_i1	atp-dependent rna helicase ddx54-like	1642	20	1.0695e-44	0.5545
33063	c29667_g1_i1	atp-dependent rna helicase ddx54-like	810	20	4.49339e-134	0.827
39097	c35815_g1_i1	atp-dependent rna helicase ddx55	325	20	3.22727e-48	0.8265
35593	c32288_g1_i1	atp-dependent rna helicase ddx55 isoform x1	468	20	3.84898e-52	0.7485
454	c457_g1_i2	atp-dependent rna helicase ddx55-like	557	20	4.27276e-37	0.76
51424	c48398_g1_i1	atp-dependent rna helicase dhx30	1392	20	9.26094e-91	0.655
21174	c17529_g1_i1	atp-dependent rna helicase dhx30-like	835	20	1.33819e-49	0.5665
40869	c37621_g1_i1	atp-dependent rna helicase dhx33	263	20	5.14318e-27	0.734
51178	c48153_g1_i1	atp-dependent rna helicase dhx33	543	20	4.90287e-63	0.7715
56161	c53198_g1_i1	atp-dependent rna helicase dhx33-like	323	20	8.85414e-46	0.8335
20700	c17050_g1_i1	atp-dependent rna helicase dhx8	769	20	1.03852e-164	0.9655
35421	c32115_g1_i1	atp-dependent rna helicase dhx8	1178	20	6.41184e-159	0.8285
39617	c36345_g1_i1	atp-dependent rna helicase dhx8	965	20	0	0.9305
62513	c59687_g1_i1	atp-dependent rna helicase dhx8	990	20	5.46034e-19	0.648
12094	c12519_g1_i1	atp-dependent rna helicase me31b-like	2157	20	0	0.903
12095	c12519_g1_i2	atp-dependent rna helicase me31b-like	1869	20	0	0.903
16659	c15424_g1_i1	atp-dependent rna helicase pl10-like	5685	20	0	0.8305
16660	c15424_g1_i2	atp-dependent rna helicase pl10-like	5697	20	0	0.8305
16661	c15424_g1_i3	atp-dependent rna helicase pl10-like	5658	20	0	0.837
16662	c15424_g1_i4	atp-dependent rna helicase pl10-like	5571	20	0	0.822
15526	c14929_g2_i2	atp-dependent rna helicase suv3 mitochondrial-like	3647	20	0	0.772
14767	c14517_g1_i1	atrial natriuretic peptide receptor 1-like	1814	20	0	0.873
40924	c37677_g1_i1	atrial natriuretic peptide receptor 1-like	291	20	5.02589e-39	0.7925
52403	c49384_g1_i1	atrial natriuretic peptide receptor 1-like	344	20	1.39227e-20	0.5595
42007	c38792_g1_i1	atrial natriuretic peptide-converting enzyme-like	730	20	6.11002e-37	0.51
64270	c61473_g1_i1	atrial natriuretic peptide-converting enzyme-like	342	20	1.63739e-10	0.5025
236	c227_g1_i1	at-rich interactive domain-containing protein	1367	1	2.40469e-06	0.87
10615	c11138_g1_i1	at-rich interactive domain-containing protein 2	880	11	3.30522e-12	0.46
10617	c11138_g1_i3	at-rich interactive domain-containing protein 2	1018	10	3.34883e-12	0.457
52844	c49826_g1_i1	at-rich interactive domain-containing protein 2	1015	20	1.97595e-60	0.6605
4716	c4962_g1_i1	at-rich interactive domain-containing protein 2-like	983	20	5.43903e-80	0.6545
10616	c11138_g1_i2	at-rich interactive domain-containing protein 2-like	763	7	2.47913e-10	0.4557
59370	c56501_g1_i1	at-rich interactive domain-containing protein 2-like	2874	20	4.36248e-60	0.664
29615	c26149_g1_i1	at-rich interactive domain-containing protein 4b	301	10	9.95239e-08	0.826
36404	c33100_g1_i1	at-rich interactive domain-containing protein 4b	2387	19	2.50839e-10	0.7347
36458	c33154_g1_i1	at-rich interactive domain-containing protein 4b	811	20	9.27987e-68	0.7415
59162	c56293_g1_i1	at-rich interactive domain-containing protein 4b	529	20	3.36218e-62	0.7655
1853	c1951_g1_i1	at-rich interactive domain-containing protein 5b	2960	20	6.5166e-46	0.537
6758	c7065_g1_i1	at-rich interactive domain-containing protein 5b isoform x1	352	20	1.27176e-37	0.7715
2724	c2810_g1_i1	attractin-like protein 1-like	2694	20	2.6204e-165	0.5085
3548	c3655_g1_i1	attractin-like protein 1-like	1902	20	1.46879e-110	0.6755
6953	c7277_g1_i2	atypical protein kinase c	2037	20	0	0.8225
7899	c8227_g1_i1	autophagy protein 5	438	20	4.87213e-56	0.75
7900	c8227_g1_i2	autophagy protein 5	220	20	9.86218e-12	0.8385
20835	c17184_g1_i1	autophagy protein 5	377	20	4.30926e-77	0.773
51625	c48599_g1_i1	autophagy-related protein 101-like	1434	20	2.5494e-102	0.81
61541	c58696_g1_i1	autophagy-related protein 13 homolog	485	20	7.90715e-37	0.742
20514	c16862_g1_i1	autophagy-related protein 13 isoform x8	299	20	1.34774e-13	0.6425
30764	c27317_g1_i1	autophagy-related protein 2 homolog a	403	8	6.80567e-09	0.6513
30886	c27440_g1_i1	autophagy-related protein 2 homolog a	1157	20	1.09611e-42	0.4895
62414	c59585_g1_i1	autophagy-related protein 2 homolog b	1516	20	1.19046e-107	0.5985
54514	c51511_g1_i1	autophagy-related protein 2 homolog b isoform x2	755	20	4.02557e-45	0.5445
21030	c17382_g1_i1	autophagy-related protein 9a	3065	20	0	0.6545
8915	c9399_g1_i1	autophagy-specific gene 2	5587	20	0	0.595
8916	c9399_g1_i2	autophagy-specific gene 2	5674	20	0	0.595
63386	c60574_g1_i1	autophagy-specific gene 6	1207	20	4.63173e-119	0.734
60948	c58092_g1_i1	axin dorsalization-associated protein	249	20	1.85119e-09	0.6
7610	c7899_g1_i1	axin-1 isoform x2	3118	20	1.53429e-60	0.5085
7611	c7899_g1_i2	axin-1 isoform x2	2956	20	6.83834e-41	0.471
7612	c7899_g1_i3	axin-1 isoform x2	2971	20	1.14927e-60	0.5085
51600	c48574_g1_i1	axis inhibition protein	2649	20	7.33377e-12	0.827
52423	c49404_g1_i1	axoneme-associated protein	1471	20	6.57426e-49	0.6225
39791	c36523_g1_i1	azf1p	823	20	3.02192e-09	0.635
2196	c2287_g1_i1	b chain crystal structure of parp catalytic domain in complex with novel inhibitors	896	20	5.99208e-134	0.8205
5920	c6137_g1_i1	b chain kynurenine aminotransferase ii inhibitors	1076	20	3.56084e-116	0.6425
5921	c6137_g1_i2	b chain kynurenine aminotransferase ii inhibitors	1015	20	2.67455e-83	0.6765
45136	c41979_g1_i1	b chain snapshots of the rna processing factor scaf8 bound to different phosphorylated forms of the carboxy-terminal domain of rna-polymerase ii	713	20	3.9312e-80	0.864
46546	c43412_g1_i1	b lymphoma mo-mlv insertion region	239	20	6.63224e-10	0.691
43050	c39886_g1_i1	b( +)-type amino acid transporter 1-like	4053	20	0	0.7325
58512	c55625_g1_i1	b12-dependent methionine synthase	258	20	5.54254e-11	0.834
53147	c50129_g1_i1	b9 domain-containing protein 1	588	20	5.36787e-75	0.7105
5187	c5444_g1_i1	bab-i protein	728	20	6.50914e-13	0.7115
5188	c5444_g1_i2	bab-i protein	746	20	6.34561e-13	0.8415
18193	c15792_g1_i1	baculoviral iap repeat-containing protein 3-like	3002	20	0	0.5105
7329	c7647_g1_i1	baculoviral iap repeat-containing protein 6	3943	20	1.97527e-99	0.5085
10925	c11413_g1_i1	baculoviral iap repeat-containing protein 6	4863	20	0	0.545
10926	c11413_g1_i2	baculoviral iap repeat-containing protein 6	4875	20	0	0.5465
23931	c20331_g1_i1	baculoviral iap repeat-containing protein 6	735	20	6.0678e-36	0.574
36022	c32717_g1_i1	baculoviral iap repeat-containing protein 6	1351	20	1.46922e-84	0.5775
36463	c33159_g1_i1	baculoviral iap repeat-containing protein 6	1396	20	2.44644e-54	0.491
57263	c54337_g1_i1	baculoviral iap repeat-containing protein 6	487	20	7.50837e-24	0.575
2568	c2669_g1_i1	baculoviral iap repeat-containing protein 6-like isoform x2	1595	20	1.60722e-46	0.727
10143	c10692_g1_i1	bag family molecular chaperone regulator 3	2397	20	9.22039e-15	0.6625
12848	c13130_g1_i1	bahcc1 partial	2410	20	1.71284e-82	0.7255
12849	c13130_g1_i2	bahcc1 partial	2722	20	1.0559e-63	0.7315
10611	c11134_g1_i1	bai1-associated protein 3-like	3969	20	8.96559e-54	0.445
36682	c33378_g1_i1	band 7 protein aael010189-like	239	20	2.58239e-16	0.8965
432	c438_g1_i1	band 7 protein cg42540-like	977	20	2.04519e-66	0.902
433	c438_g1_i2	band 7 protein cg42540-like	1096	20	1.14698e-65	0.8865
21519	c17879_g1_i1	band -like protein 4a (nbl4 protein)	467	20	2.64735e-32	0.6105
46515	c43379_g1_i1	band -like protein 4a-like	833	20	4.74721e-28	0.7865
56056	c53092_g1_i1	band -like protein 4a-like isoform x2	409	6	9.80136e-09	0.6667
46113	c42973_g1_i1	band -like protein 5	425	20	8.19483e-08	0.8725
52169	c49147_g1_i1	band -like protein 5-like	1192	20	0	0.8025
63433	c60621_g1_i1	bardet-biedl syndrome 1	586	20	1.05859e-72	0.7595
61052	c58197_g1_i1	bardet-biedl syndrome 1 protein	322	20	2.03127e-33	0.7285
23101	c19484_g1_i1	bardet-biedl syndrome 2 protein	212	20	3.56708e-29	0.9055
51918	c48893_g1_i1	bardet-biedl syndrome 2 protein homolog	439	20	2.86584e-50	0.796
51757	c48729_g1_i1	bardet-biedl syndrome 4 protein	245	20	1.48743e-46	0.9145
28327	c24856_g1_i1	bardet-biedl syndrome 7	277	20	1.17842e-35	0.854
33312	c29923_g1_i1	bardet-biedl syndrome 7 protein	269	20	6.7474e-26	0.748
60958	c58102_g1_i1	bardet-biedl syndrome 7 protein	459	20	1.40949e-50	0.7155
2691	c2785_g1_i2	bardet-biedl syndrome 7 protein isoform x1	610	20	6.71265e-98	0.8535
2690	c2785_g1_i1	bardet-biedl syndrome 7 protein isoform x2	494	20	2.09266e-80	0.877
5727	c5953_g1_i1	barrier-to-autointegration factor	2577	20	8.9528e-56	0.8775
38002	c34711_g1_i1	barrier-to-autointegration factor	649	20	2.31488e-49	0.8785
57159	c54228_g1_i1	basement membrane-specific heparan sulfate proteoglycan core partial	213	20	3.83688e-18	0.6865
52605	c49586_g1_i1	basic helix-loop-helix zip transcription factor	623	20	1.88954e-28	0.7205
22088	c18458_g1_i1	basic leucine zipper nuclear factor 1	330	20	2.52591e-15	0.6985
54461	c51459_g1_i1	basonuclin 2	256	20	1.86786e-16	0.709
17936	c15743_g2_i3	b-box zinc finger family protein	7808	3	5.24605e-08	0.57
7516	c7817_g1_i1	bbsome-interacting protein 1-like	1190	20	6.9809e-13	0.7725
10567	c11092_g1_i1	b-cell cll lymphoma 6 member b	5193	20	1.45929e-28	0.674
8634	c9061_g1_i1	b-cell cll lymphoma 7 protein family member b-like	865	20	1.07985e-34	0.7095
30824	c27377_g1_i1	b-cell lymphoma 6 protein isoform 2	791	20	7.71177e-08	0.442
23782	c20180_g1_i1	bchain guanine nucleotide exchange region of intersectin in complex with cdc42	877	20	4.05955e-77	0.617
9219	c9712_g1_i1	bcl2 adenovirus e1b 19 kda protein-interacting protein 3-like	1535	20	6.36044e-53	0.719
9220	c9712_g1_i2	bcl2 adenovirus e1b 19 kda protein-interacting protein 3-like	1513	20	1.5619e-53	0.722
11112	c11588_g1_i1	bcl2 adenovirus e1b 19-kd protein-interacting	2189	20	1.57786e-99	0.763
11113	c11588_g1_i2	bcl2 adenovirus e1b 19-kd protein-interacting	2844	20	1.23756e-97	0.763
59046	c56176_g1_i1	bcl2 adenovirus e1b 19-kd protein-interacting	380	20	2.13596e-61	0.8035
22075	c18445_g1_i1	bcl-2-related ovarian killer	1398	20	2.77847e-74	0.6225
13177	c13395_g1_i1	bcl-6 corepressor	5043	20	6.76441e-56	0.649
6941	c7265_g1_i1	bcr-associated bap	3474	20	2.18382e-52	0.6525
27289	c23788_g1_i1	beadex dlmo protein	241	20	5.6993e-46	0.953
61113	c58260_g1_i1	beat- isoform a	615	20	1.65105e-23	0.545
20198	c16543_g1_i1	beat- isoform b	2236	20	7.28882e-28	0.521
54781	c51784_g1_i1	beat- isoform b	663	20	4.26071e-29	0.6025
2894	c2970_g1_i1	beat protein	1410	20	6.47531e-48	0.5585
3110	c3167_g1_i1	beat protein	1146	20	1.94032e-28	0.506
3894	c4060_g1_i1	beat protein	1242	20	3.77259e-36	0.5565
4528	c4761_g1_i1	beat protein	999	20	1.66963e-46	0.5895
4529	c4761_g1_i2	beat protein	1265	20	2.06846e-45	0.5925
8226	c8543_g1_i3	beat protein	1065	20	1.91519e-45	0.5595
9809	c10377_g1_i1	beat protein	1045	20	2.2181e-34	0.5455
10595	c11122_g1_i1	beat protein	2168	20	4.25781e-26	0.4745
10596	c11122_g1_i2	beat protein	2096	20	3.79958e-26	0.474
11916	c12353_g1_i1	beat protein	1281	20	1.73995e-57	0.571
11917	c12353_g1_i2	beat protein	897	20	8.71574e-24	0.5885
11918	c12353_g1_i3	beat protein	1255	20	1.42556e-57	0.571
25180	c21600_g1_i1	beat protein	865	20	1.7387e-23	0.557
26941	c23424_g1_i1	beat protein	217	20	3.92632e-10	0.612
30825	c27378_g1_i1	beat protein	511	20	1.07908e-17	0.6435
43818	c40650_g1_i1	beat protein	1794	20	2.39528e-52	0.587
51467	c48441_g1_i1	beat protein	752	20	6.97782e-60	0.594
53461	c50447_g1_i1	beat protein	1142	20	2.30697e-58	0.63
57111	c54179_g1_i1	beat protein	416	20	3.16136e-27	0.621
60935	c58079_g1_i1	beat protein	642	20	3.12679e-34	0.581
63123	c60304_g1_i1	beat protein	218	20	1.80428e-17	0.6525
38932	c35646_g1_i1	beaten path ia	445	20	9.43708e-13	0.5325
22771	c19151_g1_i1	beclin-1-like protein	340	20	1.04608e-19	0.643
7629	c7915_g1_i1	bestrophin isoform a	1242	20	1.75216e-94	0.6585
10168	c10719_g1_i1	bestrophin partial	1495	20	6.44779e-51	0.482
10169	c10719_g1_i2	bestrophin partial	1356	20	1.34417e-48	0.485
60431	c57567_g1_i1	bestrophin-1	300	20	1.88886e-51	0.8645
51907	c48881_g1_i1	bet1 homolog	403	20	9.83092e-25	0.648
5527	c5760_g1_i1	bet1-like protein	420	20	5.89314e-19	0.6585
29847	c26384_g1_i1	beta 1	230	20	3.1052e-10	0.682
41540	c38307_g1_i1	beta 1	275	20	1.78919e-19	0.693
16191	c15235_g1_i1	beta actin	406	20	2.53097e-86	0.963
32847	c29444_g1_i1	beta and beta-prime subunits of dna dependent rna-polymerase	297	20	8.53548e-38	0.805
38508	c35218_g1_i1	beta carbonic anhydrase 1-like	395	20	5.07142e-55	0.796
18743	c15877_g2_i1	beta esterase 6	401	20	2.48185e-47	0.6975
52725	c49707_g1_i1	beta- -galactosyltransferase 1	954	20	3.53598e-17	0.4635
59297	c56428_g1_i1	beta- -galactosyltransferase 1	1100	20	1.02199e-56	0.5505
4404	c4620_g1_i1	beta- -galactosyltransferase 1-like	1410	20	1.01392e-79	0.56
11855	c12299_g1_i1	beta- -galactosyltransferase 1-like	1410	20	1.47722e-94	0.688
11856	c12299_g1_i2	beta- -galactosyltransferase 1-like	2100	20	3.20349e-92	0.687
11857	c12299_g1_i3	beta- -galactosyltransferase 1-like	2142	20	5.35411e-92	0.687
56449	c53498_g1_i1	beta- -galactosyltransferase 3-like	248	20	1.39532e-31	0.754
30682	c27230_g1_i1	beta- -galactosyltransferase 5	274	20	9.52745e-22	0.6695
51948	c48924_g1_i1	beta- -galactosyltransferase 7	2700	20	1.39345e-106	0.7115
35379	c32073_g1_i1	beta- -galactosyltransferase brn	915	20	2.27422e-55	0.655
59718	c56849_g1_i1	beta- -galactosyltransferase brn-like	862	20	7.93654e-46	0.7575
8561	c8975_g1_i1	beta- -glucan-binding protein	15107	20	0	0.5905
8562	c8975_g1_i2	beta- -glucan-binding protein	15126	20	0	0.5905
17410	c15634_g1_i1	beta- -glucosyltransferase-like	3607	20	2.01679e-106	0.6185
17411	c15634_g1_i2	beta- -glucosyltransferase-like	3420	20	9.4599e-118	0.5985
17412	c15634_g1_i3	beta- -glucosyltransferase-like	3659	20	3.40245e-117	0.5985
17413	c15634_g1_i4	beta- -glucosyltransferase-like	2456	20	1.05187e-120	0.5985
17414	c15634_g1_i5	beta- -glucosyltransferase-like	3681	20	3.83953e-117	0.5985
17416	c15634_g1_i7	beta- -glucosyltransferase-like	3572	20	2.16579e-117	0.5985
29540	c26074_g1_i1	beta- -glucuronyltransferase p	277	20	3.82292e-34	0.764
58794	c55923_g1_i1	beta lysosomal	366	5	1.35955e-06	0.56
48757	c45665_g1_i1	beta- -mannosyl-glycoprotein 4-beta-n-acetylglucosaminyltransferase	381	20	3.89909e-12	0.534
12950	c13209_g2_i1	beta- -mannosyltransferase egh-like	3021	20	0	0.7835
12951	c13209_g2_i2	beta- -mannosyltransferase egh-like	2973	20	0	0.7835
12952	c13209_g2_i3	beta- -mannosyltransferase egh-like	3069	20	0	0.7835
10817	c11321_g1_i1	beta- -n-acetylgalactosaminyltransferase bre-4-like	1691	20	4.69838e-81	0.6515
16514	c15364_g1_i1	beta- partial	372	20	4.1872e-81	0.946
16515	c15364_g1_i2	beta- partial	247	20	2.93297e-51	0.9715
50429	c47378_g1_i1	beta- partial	222	20	4.14184e-30	0.804
66320	c63587_g1_i1	beta- partial	307	20	9.68821e-68	0.99
51579	c48553_g1_i1	beta-1 adrenergic receptor	2034	20	4.16733e-45	0.4865
36026	c32721_g1_i1	beta-1-syntrophin-like	1216	20	1.10795e-24	0.6475
30646	c27194_g1_i1	beta-2 adrenergic receptor-like	1299	20	1.64683e-105	0.75
36363	c33059_g1_i1	beta3 protein	1022	20	3.38153e-74	0.6195
16098	c15198_g1_i1	beta-arrestin 1	1714	20	0	0.839
43234	c40067_g1_i1	beta-arrestin-1-like isoform 1	290	20	1.06829e-19	0.596
23216	c19601_g1_i1	beta-catenin-like protein 1	722	20	1.3546e-122	0.8615
15550	c14939_g1_i1	beta-centractin	1640	20	0	0.9255
53704	c50690_g1_i1	beta-chimaerin isoform x2	291	7	8.4713e-07	0.5857
7708	c8029_g1_i1	beta-galactosidase precursor	2329	20	0	0.6325
7709	c8029_g1_i2	beta-galactosidase precursor	2181	20	0	0.6325
36723	c33420_g1_i1	beta-glu	224	20	6.56069e-36	0.9295
8460	c8862_g1_i1	beta-glucuronidase-like	993	20	1.04934e-69	0.6955
59566	c56696_g1_i1	beta-glucuronidase-like	1199	20	1.60271e-119	0.653
8527	c8940_g1_i1	beta-hexosaminidase subunit alpha-like	982	20	1.65289e-83	0.6995
17601	c15681_g6_i1	beta-hexosaminidase subunit beta	4361	20	8.82105e-175	0.6005
52550	c49530_g1_i1	beta-hexosaminidase subunit beta-like	884	20	7.38683e-100	0.6435
27608	c24128_g1_i1	beta-ig-h3 fasciclin	1010	20	4.47812e-18	0.457
39000	c35715_g1_i1	beta-lactamase-like protein 2-like	1068	20	1.93604e-96	0.708
61667	c58827_g1_i1	beta-mannosidase	342	20	3.73515e-36	0.72
41925	c38706_g1_i1	beta-mannosidase-like	244	20	4.22485e-20	0.689
2042	c2117_g1_i2	beta-parvin isoform 2	2007	20	1.35718e-139	0.82
2041	c2117_g1_i1	beta-parvin-like isoform x1	2095	20	1.98549e-145	0.8185
17393	c15632_g3_i1	beta-sarcoglycan	1040	20	8.01197e-65	0.59
17396	c15632_g3_i3	beta-sarcoglycan	1134	20	2.25926e-64	0.5905
19968	c16313_g1_i1	beta-secretase 2 isoform x1	428	20	4.00872e-22	0.6655
15859	c15088_g2_i1	beta-tubulin	2611	20	0	0.96
15860	c15088_g2_i2	beta-tubulin	2687	20	0	0.98
28421	c24951_g1_i1	bf-death-nacht- -3p	548	20	5.65662e-16	0.52
59310	c56441_g1_i1	bhlh factor	1790	20	1.98878e-33	0.839
13299	c13479_g1_i1	bhlhzip transcription factor max bigmax	754	20	1.76071e-49	0.8365
12434	c12794_g1_i1	bicoid stability factor	5342	20	0	0.5765
12435	c12794_g1_i2	bicoid stability factor	5272	20	0	0.5765
25822	c22260_g1_i1	bicoid stability factor	637	20	1.56545e-16	0.482
9984	c10553_g1_i1	bifunctional 3 -phosphoadenosine 5 -phosphosulfate synthase 2	1168	20	0	0.8235
35905	c32601_g1_i1	bifunctional 3 -phosphoadenosine 5 -phosphosulfate synthase 2	828	20	1.56155e-138	0.872
41092	c37846_g1_i1	bifunctional arginine demethylase and lysyl-hydroxylase jmjd6	291	20	2.25865e-17	0.896
66256	c63522_g1_i1	bifunctional coenzyme a synthase	331	20	2.1873e-22	0.669
12092	c12516_g1_i1	bifunctional glutamate proline--trna ligase isoform x1	4941	20	0	0.681
9943	c10523_g1_i1	bifunctional heparan sulfate n-deacetylase n-sulfotransferase-like	2535	20	0	0.801
22315	c18690_g1_i1	bifunctional heparan sulfate n-deacetylase n-sulfotransferase-like	741	20	1.17962e-70	0.6705
61572	c58727_g1_i1	bifunctional polynucleotide phosphatase kinase	328	20	1.66331e-37	0.717
27902	c24425_g1_i1	bifunctional polynucleotide phosphatase kinase-like	272	20	4.92572e-27	0.6835
32850	c29447_g1_i1	bifunctional polynucleotide phosphatase kinase-like isoform 1	340	7	2.61093e-08	0.4943
5195	c5453_g1_i1	bifunctional protein ncoat	3329	20	0	0.6345
5196	c5453_g1_i2	bifunctional protein ncoat	3383	20	0	0.6345
2695	c2789_g1_i1	bifunctional purine biosynthesis protein purh	1893	20	0	0.821
625	c618_g1_i2	big brain	5911	20	2.59557e-58	0.6285
24988	c21404_g1_i1	bile acid- :amino acid n-acyltransferase	224	20	1.65062e-10	0.6655
34351	c30999_g1_i1	bile acid- :amino acid n-acyltransferase	202	20	1.64849e-18	0.7455
56524	c53575_g1_i1	bile salt-activated lipase	363	20	5.64568e-23	0.5205
38010	c34719_g1_i1	biogenesis of lysosome-related organelles complex 1 subunit 1-like	1010	20	2.57849e-40	0.82
30105	c26644_g1_i1	biogenesis of lysosome-related organelles complex 1 subunit 2-like	630	20	2.92867e-62	0.7615
63244	c60430_g1_i1	biogenesis of lysosome-related organelles complex 1 subunit 4-like	682	20	5.04217e-19	0.5355
36821	c33517_g1_i1	biotin carboxylase subunit of acetyl carboxylase	504	6	2.57697e-08	0.4917
6086	c6321_g1_i1	biotin--protein ligase	1360	20	9.43501e-105	0.5805
6087	c6321_g1_i2	biotin--protein ligase	1040	20	2.12308e-78	0.5845
31120	c27678_g1_i1	biotin--protein ligase	308	20	1.07104e-27	0.6435
47279	c44158_g1_i1	biotin--protein ligase	355	20	2.95235e-16	0.6655
1614	c1720_g1_i1	biotin--protein ligase-like	1131	1	7.1843e-07	0.45
46000	c42859_g1_i1	bis(5 -adenosyl)-triphosphatase enpp4	379	20	2.52223e-16	0.618
56075	c53111_g1_i1	bis(5 -adenosyl)-triphosphatase enpp4	211	20	3.23277e-12	0.6485
60692	c57830_g1_i1	bis(5 -nucleosyl)-tetraphosphatase	246	20	4.94362e-11	0.79
93	c100_g1_i1	bladder cancer-associated	3273	20	4.71726e-20	0.824
55335	c52351_g1_i1	blastoderm specific protein	330	20	8.35729e-11	0.6415
16845	c15491_g1_i1	blastula protease 10-like	3618	20	8.90964e-29	0.5245
54169	c51161_g1_i1	bleomycin hydrolase	491	20	6.10485e-75	0.8085
9475	c9987_g1_i1	blood vessel epicardial substance	1546	20	3.90142e-114	0.8025
47250	c44129_g1_i1	blood vessel epicardial substance-like	490	20	8.24964e-42	0.682
9476	c9987_g1_i2	blood vessel epicardial substance-like isoform 3	1688	20	1.70127e-133	0.7555
4793	c5035_g1_i2	bloom syndrome protein	226	20	1.14058e-29	0.83
4792	c5035_g1_i1	bloom syndrome protein homolog	272	20	1.47253e-41	0.8275
58802	c55931_g1_i1	bloom syndrome protein homolog	230	20	4.16974e-21	0.6795
66073	c63333_g1_i1	bloom syndrome protein homolog	252	20	1.09665e-16	0.6985
24657	c21069_g1_i1	bm8 interacting protein 2d-4	399	20	3.22065e-35	0.6145
36352	c33048_g1_i1	bm8 interacting protein 2d-4	234	20	2.11911e-16	0.5905
26426	c22890_g1_i1	bmh2p	265	20	1.069e-43	0.8975
7575	c7863_g1_i1	bmp and activin membrane-bound inhibitor homolog	1797	20	1.79978e-24	0.503
11269	c11734_g1_i1	bmp-binding endothelial regulator	3344	20	3.73487e-144	0.525
54472	c51470_g1_i1	bms1l protein	1080	20	1.18568e-123	0.718
9086	c9571_g1_i3	bola-like protein 2-like	303	20	3.73546e-17	0.7555
45359	c42205_g1_i1	bola-like protein 3-like	287	20	5.62855e-27	0.7355
10242	c10775_g1_i1	bola-like protein ddb_g0274169-like	734	20	1.98308e-43	0.765
10243	c10775_g1_i2	bola-like protein ddb_g0274169-like	919	20	2.04118e-42	0.764
15462	c14895_g1_i1	bone morphogenetic protein	3456	20	0	0.8255
15463	c14895_g1_i2	bone morphogenetic protein	2864	20	0	0.8255
24782	c21196_g1_i1	bone morphogenetic protein 3	651	20	1.13336e-37	0.7285
28492	c25023_g1_i1	bone morphogenetic protein 6	444	20	1.45445e-30	0.6825
30777	c27330_g1_i1	bone morphogenetic protein receptor type-1a	338	20	9.01825e-56	0.8835
51180	c48155_g1_i1	bone morphogenetic protein receptor type-1b	224	20	7.72624e-34	0.8635
23005	c19387_g1_i1	bone morphogenetic protein receptor type-1b-like	232	20	1.01662e-07	0.583
59785	c56916_g1_i1	bone morphogenetic protein receptor type-1b-like	497	20	2.77856e-40	0.6125
19145	c15935_g8_i1	bone morphogenetic protein receptor type-2	9219	20	1.58302e-126	0.5975
24975	c21390_g1_i1	box c d snorna protein 1-like	491	20	1.29725e-19	0.541
51172	c48147_g1_i1	box c d snorna protein 1-like	587	20	3.44805e-31	0.5735
6064	c6293_g1_i1	br serine threonine-protein	2489	20	0	0.905
38198	c34908_g1_i1	brahma-like protein	264	20	1.91874e-32	0.792
65336	c62569_g1_i1	brahma-like protein	203	20	8.77036e-32	0.924
27133	c23626_g1_i1	brain chitinase and chia	240	20	7.05322e-32	0.824
39045	c35761_g1_i1	brain chitinase and chia	230	20	6.25069e-35	0.772
9812	c10381_g1_i1	brain mitochondrial carrier protein 1-like	1492	20	3.53514e-136	0.7295
10147	c10702_g1_i1	brain protein 44	666	20	2.61159e-46	0.8015
10457	c11000_g1_i1	brain protein i3-like	2750	20	1.17934e-19	0.773
44124	c40959_g1_i1	brain tumor	1175	20	5.52191e-107	0.6235
20650	c17000_g1_i1	brain tumor protein	1111	20	5.84269e-157	0.942
35766	c32462_g1_i1	brain tumor protein	445	20	1.49262e-45	0.7275
7526	c7826_g1_i1	brain-specific angiogenesis inhibitor 1-associated protein 2	1116	20	1.6009e-20	0.7895
7527	c7826_g1_i2	brain-specific angiogenesis inhibitor 1-associated protein 2	1015	20	1.16167e-20	0.791
21803	c18167_g1_i1	branched-chain-amino-acid aminotransferase	524	20	2.97854e-20	0.7775
62238	c59406_g1_i1	branched-chain-amino-acid aminotransferase-like	602	20	2.06039e-62	0.749
55179	c52189_g1_i1	branched-chain-amino-acid cytosolic	334	20	2.08857e-40	0.7385
63050	c60229_g1_i1	branched-chain-amino-acid cytosolic-like	305	20	1.80205e-41	0.77
24018	c20418_g1_i1	brca1 domain protein	253	20	2.98026e-26	0.708
13555	c13683_g1_i1	brca1-a complex subunit bre	1438	20	1.86182e-19	0.5565
9987	c10558_g1_i1	brca1-a complex subunit bre isoform 3	1001	20	1.16069e-23	0.5475
20763	c17112_g1_i1	brca1-associated protein	449	20	1.26861e-51	0.709
35898	c32594_g1_i1	brca1-associated protein	214	20	1.59758e-13	0.715
63138	c60321_g1_i1	brca1-associated ring domain protein 1	272	20	1.42089e-30	0.748
45366	c42212_g1_i1	breakpoint cluster region protein	1032	20	2.11957e-124	0.7195
61735	c58896_g1_i1	breakpoint cluster region protein	2390	20	7.13414e-155	0.6475
28004	c24527_g1_i1	breast cancer anti-estrogen resistance protein 1-like	1435	20	2.80836e-35	0.5945
52098	c49076_g1_i1	breast cancer anti-estrogen resistance protein 1-like	1676	20	4.82258e-103	0.549
16266	c15268_g1_i1	breast cancer anti-estrogen resistance protein 3-like	3806	20	2.10301e-121	0.709
16268	c15268_g1_i2	breast cancer anti-estrogen resistance protein 3-like	3741	20	1.3611e-121	0.7095
57497	c54581_g1_i1	breast cancer metastasis-suppressor 1-like protein	260	20	2.04778e-17	0.816
63020	c60198_g1_i1	breast carcinoma-amplified sequence 3	412	20	3.94826e-49	0.68
35742	c32438_g1_i1	breast carcinoma-amplified sequence 3 homolog isoform 1	388	9	2.12334e-06	0.58
29306	c25839_g1_i1	breast carcinoma-amplified sequence 3-like protein	1136	20	1.27634e-99	0.698
36560	c33255_g1_i1	brefeldin a-inhibited guanine nucleotide-exchange	1008	20	0	0.8605
47396	c44275_g1_i1	brefeldin a-inhibited guanine nucleotide-exchange protein 1	656	20	1.50357e-73	0.769
61589	c58745_g1_i1	brefeldin a-inhibited guanine nucleotide-exchange protein 1	573	20	5.00368e-29	0.8375
28690	c25223_g1_i1	brefeldin a-inhibited guanine nucleotide-exchange protein 1 isoform x2	1354	20	0	0.7325
27772	c24294_g1_i1	brefeldin a-inhibited guanine nucleotide-exchange protein 1-like	489	20	2.65184e-21	0.819
39678	c36407_g1_i1	brefeldin a-inhibited guanine nucleotide-exchange protein 1-like	352	20	2.47165e-66	0.95
48987	c45900_g1_i1	brefeldin a-inhibited guanine nucleotide-exchange protein 1-like	315	20	1.81303e-41	0.919
54130	c51121_g1_i1	brefeldin a-inhibited guanine nucleotide-exchange protein 1-like	1089	20	9.35076e-27	0.5705
46294	c43156_g1_i1	brefeldin a-inhibited guanine nucleotide-exchange protein 2	266	20	5.0921e-34	0.809
59964	c57097_g1_i1	brefeldin a-inhibited guanine nucleotide-exchange protein 2	622	20	7.90163e-13	0.6195
25227	c21647_g1_i1	brefeldin a-inhibited guanine nucleotide-exchange protein 3-like	252	20	6.87366e-15	0.6715
31880	c28448_g1_i1	brefeldin a-inhibited guanine nucleotide-exchange protein 3-like	364	19	8.90569e-14	0.5432
43172	c40005_g1_i1	brefeldin a-inhibited guanine nucleotide-exchange protein 3-like	480	9	7.41627e-12	0.4911
14915	c14593_g2_i1	bridging integrator	2311	20	7.99252e-89	0.6995
14916	c14593_g2_i2	bridging integrator	2374	20	7.9244e-122	0.6905
14917	c14593_g2_i3	bridging integrator	2281	20	1.51802e-115	0.691
20285	c16631_g1_i1	bridging integrator 3 homolog	943	2	2.27547e-13	0.475
35513	c32207_g1_i1	brisc and brca1-a complex member 1-like	1078	20	5.39314e-70	0.598
5490	c5724_g1_i1	bro1 domain-containing protein brox-like	2517	20	1.92737e-143	0.6655
5491	c5724_g1_i2	bro1 domain-containing protein brox-like	3444	20	3.18518e-140	0.6655
49839	c46765_g1_i1	broad-complex	208	20	1.36413e-22	0.8135
58608	c55731_g1_i1	broad-complex core protein	221	20	8.68239e-09	0.634
2679	c2775_g1_i1	broad-complex core protein isoform 6	420	20	2.46035e-37	0.7715
14712	c14476_g1_i1	broad-complex core protein isoform 6	6184	20	1.29729e-48	0.68
51702	c48676_g1_i1	broad-complex core protein isoform 6	976	20	3.05569e-53	0.708
59821	c56952_g1_i1	broad-complex core protein isoform 6	940	12	1.52189e-37	0.735
62836	c60012_g1_i1	broad-complex core protein isoform 6	1030	20	2.57874e-51	0.823
36921	c33619_g1_i1	broad-complex core protein isoforms 1 2 3 4 5	416	20	3.22754e-22	0.741
45345	c42191_g1_i1	broad-complex core protein isoforms 1 2 3 4 5	1124	20	1.30868e-43	0.7335
56458	c53507_g1_i1	broad-complex core protein isoforms 1 2 3 4 5	208	20	1.54106e-24	0.6795
57392	c54471_g1_i1	broad-complex core protein isoforms 1 2 3 4 5-like	280	20	1.5604e-07	0.63
39063	c35779_g1_i1	broad-complex isoform z4	240	2	4.31176e-06	0.56
5138	c5398_g1_i1	broad-complex protein isoform 4	245	1	2.5204e-28	0.93
7257	c7587_g1_i1	broad-complex protein isoform 4	1384	20	5.76763e-53	0.6375
7258	c7587_g1_i2	broad-complex protein isoform 4	1274	20	2.44122e-53	0.6375
12215	c12616_g1_i1	broad-complex protein isoform 4	1232	20	3.28678e-55	0.667
12216	c12616_g1_i2	broad-complex protein isoform 4	1194	20	2.83819e-55	0.667
12217	c12616_g1_i3	broad-complex protein isoform 4	743	20	3.33333e-45	0.685
19864	c16210_g1_i1	broad-complex protein isoform 4	1133	20	1.54653e-56	0.6655
33703	c30329_g1_i1	broad-complex protein isoform 4	343	2	2.82762e-06	0.625
42755	c39579_g1_i1	broad-complex protein isoform 4	229	20	2.9845e-09	0.6335
51852	c48825_g1_i1	broad-complex protein isoform 4	1070	20	3.22785e-57	0.6885
30118	c26657_g1_i1	bromo adjacent homology domain-containing protein	433	20	1.34691e-57	0.7595
53924	c50914_g1_i1	bromo adjacent-like proteiny domain-containing 1 protein	645	20	6.21477e-17	0.778
12984	c13231_g1_i1	bromodomain adjacent to zinc finger domain protein 1a-like isoform 1	5474	20	4.20043e-107	0.5055
18387	c15822_g1_i1	bromodomain adjacent to zinc finger domain protein 2b	1733	20	7.06946e-29	0.7915
18388	c15822_g2_i1	bromodomain adjacent to zinc finger domain protein 2b-like	8578	20	3.61786e-134	0.5465
18389	c15822_g2_i2	bromodomain adjacent to zinc finger domain protein 2b-like	8659	20	4.97279e-134	0.5465
18390	c15822_g2_i3	bromodomain adjacent to zinc finger domain protein 2b-like	7757	20	2.21832e-89	0.597
18393	c15822_g2_i6	bromodomain adjacent to zinc finger domain protein 2b-like	8611	20	3.66369e-134	0.5465
18394	c15822_g2_i7	bromodomain adjacent to zinc finger domain protein 2b-like	8629	20	3.68877e-134	0.5465
18395	c15822_g2_i8	bromodomain adjacent to zinc finger domain protein 2b-like	8536	20	2.92532e-132	0.5605
18397	c15822_g2_i10	bromodomain adjacent to zinc finger domain protein 2b-like	8742	20	1.52175e-133	0.5485
25667	c22101_g1_i1	bromodomain and phd finger-containing protein	222	20	1.51057e-36	0.8825
31456	c28019_g1_i1	bromodomain and phd finger-containing protein	310	20	4.85552e-51	0.817
33412	c30030_g1_i1	bromodomain and phd finger-containing protein	505	2	9.5143e-10	0.885
57454	c54538_g1_i1	bromodomain and wd repeat-containing protein 1	396	20	2.64566e-19	0.672
61959	c59124_g1_i1	bromodomain and wd repeat-containing protein 1-like	213	20	3.85102e-25	0.7825
31344	c27905_g1_i1	bromodomain and wd repeat-containing protein 3	359	9	3.8527e-08	0.7544
51272	c48247_g1_i1	bromodomain testis-specific protein	1179	20	3.37546e-29	0.583
10858	c11358_g1_i1	bromodomain-containing protein	2264	20	1.16804e-153	0.7435
10859	c11358_g1_i2	bromodomain-containing protein	2288	20	5.08702e-161	0.7295
56705	c53763_g1_i1	bromodomain-containing protein 1 isoform x3	393	20	3.39533e-44	0.7425
9096	c9580_g1_i1	bromodomain-containing protein 7	1339	20	1.902e-81	0.658
9097	c9580_g1_i2	bromodomain-containing protein 7	1322	20	8.37995e-82	0.658
35537	c32231_g1_i1	bromodomain-containing protein 7-like	907	20	2.42472e-45	0.6295
43508	c40343_g1_i1	bromodomain-containing protein 8	852	20	1.63839e-28	0.6655
63475	c60664_g1_i1	bromodomain-containing protein 8	277	20	5.15574e-32	0.8035
7560	c7851_g1_i1	bromodomain-containing protein 8-like	1379	20	4.80356e-13	0.6415
28003	c24526_g1_i1	brother of cdo	502	3	1.4563e-06	0.44
8933	c9418_g1_i1	brother of tout-velu	1986	20	0	0.6775
8934	c9418_g1_i2	brother of tout-velu	2511	20	0	0.6715
43510	c40345_g1_i1	bruno-3 transcript variant 28	368	20	2.34008e-47	0.997
5332	c5572_g1_i1	bsd domain-containing protein 1-like	1625	20	2.22853e-37	0.615
5333	c5572_g1_i2	bsd domain-containing protein 1-like	1934	20	2.09502e-46	0.613
3553	c3665_g1_i1	btb domain containing isoform cra_c	418	1	1.95575e-09	0.76
10748	c11250_g1_i1	btb domain containing isoform cra_c	365	2	2.32672e-15	0.725
34569	c31225_g1_i1	btb domain containing isoform cra_c	225	1	7.33203e-07	0.7
26134	c22587_g1_i1	btb poz and kelch domain-containing protein	213	20	1.83077e-17	0.7065
4250	c4469_g1_i1	btb poz domain containing protein	2438	20	0	0.8485
4251	c4469_g1_i2	btb poz domain containing protein	2259	20	0	0.8485
11820	c12264_g1_i1	btb poz domain-containing adapter for cul3-mediated degradation protein 3-like	2468	20	1.03732e-110	0.8455
11821	c12264_g1_i2	btb poz domain-containing adapter for cul3-mediated degradation protein 3-like	2613	20	2.1022e-149	0.8545
9367	c9875_g1_i1	btb poz domain-containing protein 10	1708	20	1.04989e-166	0.8775
9368	c9875_g1_i2	btb poz domain-containing protein 10	1627	20	1.96041e-167	0.8775
21036	c17388_g1_i1	btb poz domain-containing protein 17-like	1467	20	2.08197e-29	0.496
31391	c27954_g1_i1	btb poz domain-containing protein 17-like	224	19	3.60388e-15	0.6768
44280	c41116_g1_i1	btb poz domain-containing protein 1-like isoform x1	1448	20	5.41623e-31	0.452
2010	c2089_g1_i1	btb poz domain-containing protein 2-like	1359	20	1.25824e-22	0.4955
10097	c10652_g1_i1	btb poz domain-containing protein 2-like	2526	20	9.06355e-71	0.768
10098	c10652_g1_i2	btb poz domain-containing protein 2-like	2650	20	1.15046e-131	0.6375
10099	c10652_g1_i3	btb poz domain-containing protein 2-like	2267	20	9.95586e-112	0.607
29751	c26288_g1_i1	btb poz domain-containing protein 2-like	213	20	1.32899e-32	0.8785
41017	c37770_g1_i1	btb poz domain-containing protein 2-like	292	20	5.73384e-15	0.598
55306	c52321_g1_i1	btb poz domain-containing protein 2-like	350	6	6.02003e-07	0.5983
27186	c23682_g1_i1	btb poz domain-containing protein 7	255	20	5.23752e-27	0.7675
64159	c61362_g1_i1	btb poz domain-containing protein 7	290	20	3.91855e-41	0.8315
14055	c14047_g1_i1	btb poz domain-containing protein 8	2857	20	1.49633e-91	0.6485
14056	c14047_g1_i2	btb poz domain-containing protein 8	2746	20	5.86776e-92	0.6485
45012	c41853_g1_i1	btb poz domain-containing protein 9	829	20	2.34772e-99	0.723
50583	c47541_g1_i1	btb poz domain-containing protein 9	346	20	1.52727e-57	0.815
36240	c32935_g1_i1	btb poz domain-containing protein kctd15-like	518	20	3.05689e-22	0.85
42575	c39392_g1_i1	btb poz domain-containing protein kctd15-like	219	20	7.96854e-20	0.8495
6083	c6318_g1_i1	btb poz domain-containing protein kctd16-like	2401	20	7.83661e-110	0.773
5760	c5980_g1_i2	btb poz domain-containing protein kctd3	1164	20	2.92125e-102	0.832
60326	c57464_g1_i1	btb poz domain-containing protein kctd3	1269	20	0	0.865
5759	c5980_g1_i1	btb poz domain-containing protein kctd3-like	1125	20	4.6291e-110	0.6435
55377	c52393_g1_i1	btb poz domain-containing protein kctd5-like	250	20	2.25118e-15	0.874
28887	c25419_g1_i1	btb poz domain-containing protein kctd9	535	20	8.72496e-76	0.8575
8917	c9400_g1_i1	btb poz domain-containing protein kctd9-like	946	20	3.47866e-82	0.6515
34718	c31383_g1_i1	btbd2 partial	240	20	1.6282e-33	0.7885
12507	c12862_g1_i1	btb-ii protein partial	1508	20	4.62771e-49	0.8255
12509	c12862_g1_i3	btb-ii protein partial	1343	20	1.67926e-49	0.8255
10083	c10643_g1_i1	btb-protein- isoform e	1904	20	4.67333e-17	0.692
10084	c10643_g1_i2	btb-protein- isoform e	1941	20	4.86068e-17	0.692
14811	c14540_g1_i3	btb-protein- isoform e	1169	20	1.31038e-54	0.6935
42118	c38907_g1_i1	btb-protein- isoform e	327	20	9.75543e-37	0.6445
45786	c42639_g1_i1	btb-protein- isoform f	1277	20	2.30914e-28	0.727
14809	c14540_g1_i1	btb-protein- isoform g	1756	20	1.34766e-52	0.696
14810	c14540_g1_i2	btb-protein- isoform g	1765	20	1.34466e-52	0.6945
45769	c42622_g1_i1	b-type preproallatostatin ii	312	1	6.33642e-31	0.78
20054	c16399_g1_i1	b-type preproallatostatin partial	209	5	5.99671e-10	0.698
10161	c10714_g1_i1	bud13 homolog isoform x1	3230	20	8.66435e-55	0.5105
18556	c15846_g1_i1	bullous pemphigoid antigen isoforms 6 9 10	20121	20	0	0.6685
18557	c15846_g1_i2	bullous pemphigoid antigen isoforms 6 9 10	18754	20	0	0.6685
43359	c40194_g1_i1	bumetanide-sensitive na-k-cl cotransport protein	1028	20	2.21929e-131	0.759
13883	c13933_g1_i1	bumetanide-sensitive sodium- -chloride cotransporter-like	3982	20	0	0.7085
28251	c24779_g1_i1	bumetanide-sensitive sodium- -chloride cotransporter-like	1310	20	7.70185e-105	0.6
38524	c35234_g1_i1	bumetanide-sensitive sodium- -chloride cotransporter-like	273	20	2.00814e-41	0.8735
7413	c7724_g1_i1	bursicon alpha	1117	20	7.68955e-89	0.7945
44029	c40861_g1_i1	bursicon beta	1556	20	1.75183e-62	0.7675
1766	c1873_g1_i1	butyrate induced	1360	20	2.22596e-140	0.6915
52397	c49378_g1_i1	butyrophilin subfamily 2 member a2-like	334	20	3.89455e-28	0.5845
6897	c7211_g1_i1	bystin-like	1674	20	1.949e-153	0.7185
21950	c18316_g1_i1	c type lectin containing domain protein	436	3	8.71347e-23	0.6333
10921	c11409_g1_i1	c-1-tetrahydrofolate cytoplasmic	3279	20	0	0.823
10922	c11409_g1_i2	c-1-tetrahydrofolate cytoplasmic	2593	20	0	0.818
10923	c11409_g1_i3	c-1-tetrahydrofolate cytoplasmic	3369	20	0	0.7985
1702	c1805_g1_i1	c2 domain-containing protein 3-like	417	1	3.18427e-06	0.65
25959	c22401_g1_i1	c4b-binding protein beta	246	1	8.71181e-06	0.66
27652	c24172_g1_i1	c4b-binding protein beta	978	20	9.45358e-38	0.7615
63953	c61147_g1_i1	c4b-binding protein beta	211	16	5.19117e-07	0.6275
28527	c25058_g1_i1	c4b-binding protein beta chain	594	20	3.76668e-45	0.7155
47753	c44637_g1_i1	c4b-binding protein beta chain	349	20	3.32482e-38	0.667
60511	c57648_g1_i1	c4b-binding protein beta chain	1099	20	6.13856e-94	0.6015
66286	c63553_g1_i1	c4b-binding protein beta chain	213	20	2.24574e-15	0.6155
63493	c60682_g1_i1	ca	524	20	1.21205e-49	0.82
38167	c34877_g1_i1	ca2+-modulated nonselective cation channel polycystin	545	9	3.92555e-15	0.48
908	c936_g1_i1	ca-activated cl channel	395	4	2.43286e-07	0.525
16688	c15438_g1_i1	ca-activated cl channel protein	4895	20	3.07838e-88	0.4175
52885	c49867_g1_i1	ca-activated cl channel protein	1077	20	7.6315e-47	0.484
61418	c58570_g1_i1	ca-activated cl channel protein	241	4	4.44706e-10	0.66
63363	c60550_g1_i1	ca-activated cl channel protein	466	20	3.3742e-25	0.4955
51055	c48030_g1_i1	caax prenyl partial	1027	20	9.8849e-62	0.7855
21153	c17507_g1_i1	caax prenyl protease 1 homolog	1026	20	4.50768e-104	0.706
30939	c27493_g1_i1	caax prenyl protease 2-like	241	20	7.74027e-21	0.6895
30386	c26930_g1_i1	cactin cg1676-pa	854	20	2.42537e-22	0.8255
42384	c39191_g1_i1	cactin cg1676-pa	253	20	2.28388e-12	0.9225
45911	c42769_g1_i1	cactin cg1676-pa	664	20	2.43522e-97	0.827
9333	c9823_g1_i1	cactus protein	1711	20	1.58708e-169	0.616
15451	c14891_g1_i1	cad protein	3168	20	0	0.6825
15452	c14891_g1_i2	cad protein	3851	20	0	0.7255
15453	c14891_g1_i3	cad protein	3842	20	0	0.727
15454	c14891_g1_i4	cad protein	3875	20	0	0.721
3737	c3879_g1_i1	cad88c cg3389-pa	344	20	2.30592e-22	0.8055
27661	c24181_g1_i1	cadherin 88c	656	20	3.75678e-75	0.7015
34162	c30804_g1_i1	cadherin 88c	249	20	5.43558e-24	0.8005
36150	c32844_g1_i1	cadherin 88c	358	20	1.3987e-19	0.6585
40125	c36864_g1_i1	cadherin 88c	373	20	1.74487e-27	0.6135
53048	c50030_g1_i1	cadherin 88c	897	20	2.18682e-99	0.72
55845	c52879_g1_i1	cadherin 88c	317	20	1.50657e-34	0.7475
36737	c33434_g1_i1	cadherin domain protein	1937	20	4.08833e-25	0.518
56951	c54011_g1_i1	cadherin- isoform a	695	20	4.16393e-33	0.557
21269	c17625_g1_i1	cadherin- isoform b	476	20	3.95017e-25	0.574
29511	c26046_g1_i1	cadherin- isoform b	284	20	1.51969e-44	0.755
33452	c30070_g1_i1	cadherin- isoform c	224	20	2.81103e-08	0.5275
56821	c53880_g1_i1	cadherin- isoform e	203	20	3.89151e-07	0.71
15604	c14965_g1_i1	cadherin- isoform f	11021	20	0	0.812
49062	c45976_g1_i1	cadherin- isoform l	216	20	5.47142e-31	0.885
11294	c11753_g1_i2	cadherin-23-like isoform 1	1864	20	2.77261e-08	0.5015
23732	c20130_g1_i1	cadherin-23-like isoform 1	395	20	6.46718e-43	0.746
3738	c3879_g1_i2	cadherin-23-like isoform 2	871	20	1.12425e-102	0.711
11293	c11753_g1_i1	cadherin-23-like isoform 2	1915	20	3.33606e-08	0.5015
7745	c8066_g1_i1	cadherin-like and pc-esterase domain-containing protein 1	2163	20	1.05709e-33	0.5235
7746	c8066_g1_i2	cadherin-like and pc-esterase domain-containing protein 1 isoform x1	2521	20	1.33798e-125	0.545
16984	c15535_g1_i1	caffeoyl- o-methyltransferase	1111	20	7.09947e-96	0.6895
12339	c12707_g1_i1	calbindin 53e	3489	20	4.91332e-168	0.8975
17764	c15710_g1_i1	calbindin 53e	442	20	2.8157e-59	0.9
54897	c51902_g1_i1	calbindin 53e	291	20	4.51328e-52	0.947
52852	c49834_g1_i1	calbindin-32-like isoform x2	516	20	2.57722e-54	0.8755
9118	c9603_g1_i2	calcineurin b	3400	20	1.68888e-99	0.931
9117	c9603_g1_i1	calcineurin subunit b type 2-like	3373	20	2.61832e-102	0.9805
59081	c56211_g1_i1	calcineurin-binding protein cabin-1	867	20	3.91482e-43	0.5845
9991	c10561_g1_i1	calcineurin-binding protein cabin-1-like	1383	20	3.41272e-43	0.5045
45547	c42396_g1_i1	calcineurin-binding protein cabin-1-like	864	20	2.86901e-38	0.5265
51629	c48603_g1_i1	calcineurin-binding protein cabin-1-like	2742	20	1.13388e-42	0.681
64794	c62008_g1_i1	calcineurin-binding protein cabin-1-like	376	20	2.10314e-11	0.551
51932	c48907_g1_i1	calcineurin-like phosphoesterase domain-containing protein 1	1677	20	4.30184e-113	0.663
60832	c57975_g1_i1	calcipressin-2 isoform x1	892	20	1.61622e-56	0.647
49500	c46419_g1_i1	calcitonin receptor	314	20	8.12853e-42	0.744
66310	c63577_g1_i1	calcitonin receptor	214	20	2.55482e-19	0.7355
31750	c28314_g1_i1	calcium activated chlorine	476	6	3.05996e-06	0.4867
65091	c62317_g1_i1	calcium activated chlorine	275	6	1.19311e-09	0.4967
12069	c12496_g1_i1	calcium and integrin-binding protein 1	1619	20	1.27115e-88	0.83
12070	c12496_g1_i2	calcium and integrin-binding protein 1	1624	20	1.34151e-88	0.83
12071	c12496_g1_i3	calcium and integrin-binding protein 1	1589	20	1.07242e-70	0.8145
51280	c48255_g1_i1	calcium binding egf domain protein	379	20	3.53049e-32	0.598
21262	c17618_g1_i1	calcium calmodulin-dependent 3 -cyclic nucleotide phosphodiesterase 1c	901	20	7.0505e-150	0.8785
28125	c24650_g1_i1	calcium calmodulin-dependent 3 -cyclic nucleotide phosphodiesterase 1c-like	1323	18	7.04453e-19	0.6839
55202	c52212_g1_i1	calcium calmodulin-dependent 3 -cyclic nucleotide phosphodiesterase 1c-like	519	20	1.15235e-34	0.635
37359	c34062_g1_i1	calcium calmodulin-dependent protein kinase	717	20	8.23122e-95	0.9145
18159	c15785_g1_i1	calcium calmodulin-dependent protein kinase kinase	3670	20	1.3508e-149	0.691
18165	c15785_g1_i2	calcium calmodulin-dependent protein kinase kinase	3645	20	1.12562e-145	0.7035
18173	c15785_g1_i3	calcium calmodulin-dependent protein kinase kinase	3568	20	1.68974e-154	0.748
9513	c10027_g1_i2	calcium calmodulin-dependent protein kinase type 1	2407	20	0	0.863
9512	c10027_g1_i1	calcium calmodulin-dependent protein kinase type 1-like	2407	20	0	0.872
16951	c15526_g1_i5	calcium calmodulin-dependent protein kinase type ii alpha chain-like	2487	20	0	0.904
16952	c15526_g1_i6	calcium calmodulin-dependent protein kinase type ii alpha chain-like isoform 1	2514	20	0	0.9045
16947	c15526_g1_i1	calcium calmodulin-dependent protein kinase type ii alpha chain-like isoform 3	2676	20	0	0.866
16948	c15526_g1_i2	calcium calmodulin-dependent protein kinase type ii alpha chain-like isoform 3	2544	20	0	0.907
16949	c15526_g1_i3	calcium calmodulin-dependent protein kinase type ii alpha chain-like isoform 3	2637	20	0	0.8865
16950	c15526_g1_i4	calcium calmodulin-dependent protein kinase type ii alpha chain-like isoform 3	2571	20	0	0.901
8481	c8891_g1_i1	calcium calmodulin-dependent serine protein kinase membrane-associated guanylate kinase	952	20	1.08188e-72	0.667
8482	c8891_g1_i2	calcium calmodulin-dependent serine protein kinase membrane-associated guanylate kinase	991	20	1.64854e-75	0.676
6557	c6854_g1_i2	calcium channel flower-like isoform 1	730	20	3.75208e-42	0.6725
6556	c6854_g1_i1	calcium channel flower-like isoform 2	894	20	1.12434e-45	0.67
4536	c4772_g1_i1	calcium homeostasis endoplasmic reticulum protein	1737	20	1.32545e-24	0.745
44091	c40925_g1_i1	calcium homeostasis endoplasmic reticulum protein	560	20	1.5014e-38	0.657
55602	c52627_g1_i1	calcium homeostasis endoplasmic reticulum protein	1026	20	6.61483e-32	0.8935
16192	c15236_g1_i1	calcium release-activated calcium channel protein 1-like	1389	20	2.55347e-50	0.6605
11274	c11736_g1_i1	calcium uptake protein 1 mitochondrial-like	3068	20	0	0.7775
61131	c58279_g1_i1	calcium voltage- alpha 2 delta subunit 1	548	20	3.82e-38	0.52
16570	c15388_g1_i1	calcium-activated chloride channel regulator 1	2280	20	1.75621e-16	0.529
44420	c41257_g1_i1	calcium-activated chloride channel regulator 1	473	20	5.77904e-08	0.5435
45455	c42302_g1_i1	calcium-activated chloride channel regulator 1-like	1064	20	5.02845e-63	0.5125
54354	c51350_g1_i1	calcium-activated chloride channel regulator 1-like	464	20	2.97229e-15	0.5345
59410	c56541_g1_i1	calcium-activated chloride channel regulator 1-like	1472	20	1.51592e-15	0.4325
27538	c24057_g1_i1	calcium-activated chloride channel regulator 2	579	20	5.94856e-19	0.513
62672	c59846_g1_i1	calcium-activated chloride channel regulator 2	347	1	5.62211e-06	0.49
53715	c50701_g1_i1	calcium-activated chloride channel regulator 4	698	20	6.44229e-09	0.52
48476	c45378_g1_i1	calcium-activated chloride channel regulator 4-like	398	20	2.60656e-21	0.568
16451	c15337_g1_i1	calcium-activated potassium channel slowpoke-like isoform 2	8218	20	0	0.877
16452	c15337_g1_i2	calcium-activated potassium channel slowpoke-like isoform 2	8107	20	0	0.886
56202	c53241_g1_i1	calcium-binding mitochondrial carrier	404	20	7.47109e-76	0.9175
20228	c16573_g1_i1	calcium-binding mitochondrial carrier protein aralar1	500	20	7.78177e-86	0.849
2694	c2788_g1_i1	calcium-binding mitochondrial carrier protein aralar1-like	553	20	1.504e-70	0.8465
6977	c7305_g1_i1	calcium-binding mitochondrial carrier protein s -2-like	492	20	3.4053e-36	0.702
8558	c8974_g1_i1	calcium-binding protein p22	1474	20	2.75007e-96	0.88
16392	c15313_g1_i1	calcium-dependent secretion activator	6078	20	0	0.782
16393	c15313_g1_i2	calcium-dependent secretion activator	6045	20	0	0.7905
16395	c15313_g1_i3	calcium-dependent secretion activator	6027	20	0	0.791
16396	c15313_g1_i4	calcium-dependent secretion activator	6072	20	0	0.783
16397	c15313_g1_i5	calcium-dependent secretion activator	6078	20	0	0.7905
16398	c15313_g1_i6	calcium-dependent secretion activator	6012	20	0	0.793
16399	c15313_g1_i7	calcium-dependent secretion activator	6042	20	0	0.7885
16400	c15313_g1_i8	calcium-dependent secretion activator	3509	20	0	0.793
47116	c43994_g1_i1	calcium-independent phospholipase a2 isoform b	355	20	4.43723e-11	0.546
9453	c9965_g1_i1	calcium-independent phospholipase a2-gamma	1326	20	2.65114e-137	0.6745
46762	c43633_g1_i1	calcium-responsive transcription factor	763	20	1.2904e-14	0.5025
49433	c46351_g1_i1	calcium-responsive transcription factor	229	20	1.98558e-07	0.5855
45213	c42058_g1_i1	calcium-transporting atpase sarcoplasmic endoplasmic reticulum type (calcium pump)	242	20	3.45979e-40	0.9645
15368	c14850_g2_i1	calcium-transporting atpase sarcoplasmic endoplasmic reticulum type-like	3892	20	0	0.9175
15369	c14850_g2_i2	calcium-transporting atpase sarcoplasmic endoplasmic reticulum type-like	3342	20	0	0.9175
4278	c4498_g1_i1	calcium-transporting atpase type 2c member 1-like	3012	20	0	0.735
4456	c4686_g1_i1	calcyclin-binding protein	1371	20	5.071e-53	0.633
4457	c4686_g1_i2	calcyclin-binding protein	1395	20	4.38216e-56	0.636
13174	c13393_g1_i1	calcyphosin-like protein	4559	20	1.88359e-81	0.768
13175	c13393_g1_i2	calcyphosin-like protein	4453	20	1.62149e-81	0.7695
59024	c56154_g1_i1	calcyphosin-like protein	877	20	3.55846e-106	0.713
7507	c7807_g1_i1	calmodulin	3659	20	1.52302e-91	0.9585
63913	c61107_g1_i1	calmodulin-binding transcription	256	20	2.0963e-26	0.58
37612	c34315_g1_i1	calmodulin-binding transcription activator	416	20	3.18342e-22	0.5965
44011	c40843_g1_i1	calmodulin-binding transcription activator	614	20	1.03451e-41	0.69
55671	c52699_g1_i1	calmodulin-binding transcription activator	227	20	8.27523e-41	0.9005
53802	c50790_g1_i1	calmodulin-binding transcription activator 1	677	20	2.19712e-32	0.679
10735	c11242_g1_i1	calmodulin-binding transcription activator 1-like	436	20	4.73068e-46	0.9345
10737	c11242_g1_i3	calmodulin-binding transcription activator 1-like	575	20	9.34185e-46	0.9245
49572	c46493_g1_i1	calmodulin-binding transcription activator 1-like	408	20	2.56373e-11	0.6265
39418	c36143_g1_i1	calmodulin-like isoform 1	965	20	2.33068e-72	0.7945
5706	c5928_g1_i1	calmodulin-like protein 4-like	523	20	2.2582e-79	0.833
14204	c14142_g1_i1	calnexin	1832	20	4.9419e-89	0.722
21265	c17621_g1_i1	calnexin	1135	20	4.14275e-163	0.7865
37292	c33992_g1_i1	calpain (mu i) large subunit a	399	20	1.02101e-46	0.6835
29700	c26236_g1_i1	calpain 7	553	20	3.44478e-61	0.673
45112	c41954_g1_i1	calpain 9- partial	1217	20	1.5789e-16	0.6455
14639	c14429_g1_i1	calpain-5	3188	20	0	0.662
14640	c14429_g1_i2	calpain-5	3131	20	0	0.681
46517	c43382_g1_i1	calpain-7 isoform x1	282	20	2.16545e-36	0.82
5311	c5553_g1_i2	calpain-7-like isoform 1	701	20	3.90673e-118	0.8225
5310	c5553_g1_i1	calpain-7-like isoform x1	615	20	7.63053e-96	0.819
15470	c14901_g1_i1	calpain-a-like isoform 3	4386	20	0	0.824
15471	c14901_g1_i2	calpain-a-like isoform 3	4265	20	0	0.827
15473	c14901_g1_i3	calpain-a-like isoform 3	4415	20	0	0.827
15474	c14901_g1_i4	calpain-a-like isoform 3	4220	20	0	0.818
22984	c19366_g1_i1	calpain-c	475	20	2.85228e-81	0.847
57634	c54722_g1_i1	calpain-c	388	20	4.43609e-58	0.8065
9711	c10247_g1_i1	calponin transgelin	2087	20	1.55931e-83	0.822
59184	c56315_g1_i1	calponin transgelin	965	20	2.86591e-94	0.822
12768	c13081_g1_i3	calponin-3	2846	20	6.8634e-98	0.6565
12766	c13081_g1_i1	calponin-3 isoform 1	2789	20	3.90299e-98	0.6665
12767	c13081_g1_i2	calponin-3 isoform 1	1856	20	5.88994e-101	0.6665
19672	c16020_g1_i1	calreticulin	1684	20	0	0.8855
35420	c32114_g1_i1	calsyntenin- isoform c	3705	20	0	0.6745
11149	c11623_g1_i1	calumenin precursor	2101	20	7.46026e-140	0.769
11150	c11623_g1_i2	calumenin precursor	2107	20	8.53409e-140	0.769
11151	c11623_g1_i3	calumenin precursor	2116	20	9.32239e-140	0.769
20284	c16630_g1_i1	camp and camp-inhibited cgmp 3 -cyclic phosphodiesterase 10a	925	20	3.6751e-48	0.52
52854	c49836_g1_i1	camp and camp-inhibited cgmp -cyclic	398	20	2.54242e-53	0.757
31200	c27758_g1_i1	camp cgmp cyclic nucleotide	258	1	3.54474e-06	0.91
15149	c14726_g1_i1	camp-dependent protein kinase catalytic subunit	4777	20	0	0.9655
15150	c14726_g1_i2	camp-dependent protein kinase catalytic subunit	5274	20	0	0.965
15151	c14726_g1_i3	camp-dependent protein kinase catalytic subunit	4515	20	0	0.944
15152	c14726_g1_i4	camp-dependent protein kinase catalytic subunit	5022	20	0	0.9655
17492	c15657_g2_i1	camp-dependent protein kinase r2	6744	20	4.55939e-137	0.809
17494	c15657_g2_i3	camp-dependent protein kinase r2	6891	20	5.76068e-137	0.809
12204	c12610_g1_i1	camp-dependent protein kinase type i regulatory subunit	6508	20	1.79923e-166	0.8735
12205	c12610_g1_i2	camp-dependent protein kinase type i regulatory subunit	6520	20	1.83836e-166	0.8735
12206	c12610_g1_i3	camp-dependent protein kinase type i regulatory subunit-like	6400	20	0	0.8495
17496	c15657_g2_i4	camp-dependent protein kinase type ii regulatory subunit-like	5996	20	1.15573e-142	0.763
384	c374_g1_i1	camp-dependent protein kinase type ii-beta regulatory subunit	1130	1	1.50861e-07	0.62
27948	c24471_g1_i1	camp-dependent protein kinase type ii-beta regulatory subunit	236	1	5.1216e-06	0.61
1590	c1701_g1_i1	c-amp-dependent rap1 guanine-nucleotide exchange factor	2226	20	6.90142e-161	0.658
1591	c1701_g1_i2	c-amp-dependent rap1 guanine-nucleotide exchange factor	2776	20	0	0.7065
51124	c48099_g1_i1	camp-regulated phosphoprotein 19	1098	20	8.67604e-30	0.7115
[truncated: 64,565 more rows]
