# Supplementary material for: Comparative molecular analyses of select pH- and osmoregulatory genes in three freshwater crayfish Cherax quadricarinatus, C. destructor and C. cainii
Source: PeerJ. 2017 Aug 24;5:e3623. doi: 10.7717/peerj.3623 (PMC5572425; doi:10.7717/peerj.3623)
Supplement: File S6 — Annotated information of all the assembled contings obtained from Testes of freshwater crayfish Cherax quadricarinatus. Reads which met our quality criteria (Q > 30, N bases <1%) were accepted for assembly. The filtered reads were assembled with the Trinity short read de novo assembler using the stranded option for Illumina data (Version 2014-04-13p1) and the unstranded option for Ion Torrent data. Assembled data were used as BLASTx queries against the NCBI NR protein database using BLAST+ (Version 2.2.29) with a stringency of 10 × e−5. First row contains information on: number of original contigs, sequence length (contig length bp), seq. description (gene names), number of HITs and mean e-values (stringency). [file peerj-05-3623-s008.xlsx]

## Sheet: se_tab_1-15
Contig #	Original contig	Seq. Description	Seq. Length	#Hits	min. eValue	mean Similarity
1	c0_g1_i1	---NA---	599	0
2	c0_g1_i2	---NA---	1359	0
3	c1_g1_i1	---NA---	380	0
4	c1_g1_i2	---NA---	261	0
838	c1000_g1_i1	---NA---	634	0
9042	c10000_g1_i1	nf-kappa-b-repressing factor	757	20	2.84825e-37	0.7705
9043	c10003_g1_i1	ninjurin-1-like	1565	20	6.05857e-26	0.7415
9044	c10003_g1_i2	ninjurin-1-like	1664	20	9.94322e-26	0.7415
9045	c10004_g1_i1	---NA---	392	0
9046	c10005_g1_i1	cg5080 cg5080-pb	2599	20	1.7999e-62	0.642
9047	c10006_g1_i1	protein jagunal-like	1532	20	7.27302e-48	0.6265
9048	c10006_g1_i2	protein jagunal-like	1502	20	7.12518e-51	0.658
9049	c10007_g1_i1	subolesin	2377	20	2.51187e-77	0.5795
9050	c10008_g1_i1	---NA---	939	0
9051	c10008_g2_i1	wd repeat and socs box-containing protein 1 isoform 1	1765	20	2.91214e-140	0.6005
9052	c10009_g1_i1	polyprotein of retroviral	481	20	1.39855e-14	0.546
9053	c10010_g1_i1	potassium channel subfamily u member 1	2296	20	1.23923e-09	0.418
9054	c10011_g1_i1	---NA---	1424	0
9055	c10011_g2_i1	patj-like protein	1039	20	6.04354e-56	0.857
9056	c10011_g2_i2	patj-like protein	886	20	2.23681e-56	0.8515
9057	c10013_g1_i1	---NA---	435	0
9058	c10013_g1_i2	---NA---	455	0
9059	c10014_g1_i1	---NA---	508	0
9060	c10016_g1_i1	---NA---	237	0
9061	c10018_g1_i1	---NA---	301	0
9062	c10019_g1_i1	broad-complex core protein isoforms 1 2 3 4 5	2020	20	4.44132e-42	0.734
9063	c10019_g1_i2	broad-complex core protein isoforms 1 2 3 4 5	1349	20	5.86082e-43	0.734
9064	c10019_g1_i3	broad-complex core protein isoforms 1 2 3 4 5	1398	20	7.67941e-43	0.731
839	c1002_g1_i1	c4b-binding protein beta chain	266	20	8.09161e-18	0.657
9065	c10020_g1_i1	---NA---	2156	0
9066	c10021_g1_i1	---NA---	640	0
9067	c10022_g1_i1	---NA---	364	0
9068	c10023_g1_i1	---NA---	303	0
9069	c10023_g1_i2	---NA---	324	0
9070	c10023_g1_i3	---NA---	403	0
9071	c10024_g1_i1	di-n-acetylchitobiase precursor	1858	20	6.52954e-94	0.5795
9072	c10025_g1_i1	---NA---	1576	0
9073	c10026_g1_i1	---NA---	1897	0
9074	c10027_g1_i1	btb poz domain-containing protein kctd3	1952	20	0	0.8595
9075	c10028_g1_i1	---NA---	293	0
9076	c10029_g1_i1	---NA---	1625	0
9077	c10029_g1_i2	---NA---	1435	0
840	c1003_g1_i1	---NA---	246	0
9078	c10030_g1_i1	---NA---	702	0
9079	c10031_g1_i1	---NA---	260	0
9080	c10031_g1_i2	---NA---	255	0
9081	c10032_g1_i1	adenylosuccinate lyase	681	20	1.07695e-72	0.8325
9082	c10033_g1_i1	---NA---	683	0
9083	c10034_g1_i1	---NA---	292	0
9084	c10035_g1_i1	bromodomain-containing protein 7	1451	20	1.1722e-103	0.6835
9085	c10037_g1_i1	---NA---	229	0
9086	c10037_g2_i1	---NA---	204	0
9087	c10039_g1_i1	nucleosome assembly protein 1-like 4	2854	20	1.38904e-93	0.7425
9088	c10039_g1_i2	nucleosome assembly protein 1-like 4	2797	20	2.96314e-93	0.748
9089	c10040_g1_i1	---NA---	206	0
9090	c10040_g2_i1	---NA---	205	0
9091	c10041_g1_i1	---NA---	474	0
9092	c10043_g1_i1	---NA---	219	0
9093	c10044_g1_i1	n-acetylneuraminate lyase	1157	20	1.24545e-62	0.5505
9094	c10044_g1_i2	n-acetylneuraminate lyase	776	20	7.08758e-37	0.536
9095	c10045_g1_i1	---NA---	561	0
9096	c10045_g1_i2	---NA---	456	0
9097	c10048_g1_i1	uncharacterized transmembrane protein ddb_g0289901-like	255	5	8.21029e-10	0.57
841	c1005_g1_i1	---NA---	1748	0
9098	c10050_g1_i1	---NA---	301	0
9099	c10050_g2_i1	---NA---	213	0
9100	c10051_g1_i1	---NA---	1120	0
9101	c10052_g1_i1	---NA---	536	0
9102	c10053_g1_i1	---NA---	892	0
9103	c10054_g1_i1	rho-associated protein	1439	17	2.59954e-23	0.5412
9104	c10056_g1_i1	serine threonine-protein kinase wnk1	2525	20	2.14369e-23	0.59
9105	c10056_g1_i2	serine threonine-protein kinase wnk1	2666	20	3.74198e-23	0.5955
9106	c10056_g2_i1	---NA---	459	0
9107	c10058_g1_i1	tp53rk-binding isoform x1	563	20	5.14832e-36	0.6785
9108	c10058_g1_i2	tp53rk-binding protein	650	20	1.3716e-42	0.6745
842	c1006_g1_i1	---NA---	233	0
9109	c10061_g1_i1	lpxtg-domain-containing protein cell wall anchor domain	417	7	3.31515e-06	0.6114
9110	c10062_g1_i1	---NA---	803	0
9111	c10063_g1_i1	---NA---	1151	0
9112	c10063_g1_i2	---NA---	859	0
9113	c10064_g1_i1	vascular endothelial growth factor receptor 1-like	420	20	2.07933e-53	0.844
9114	c10064_g1_i2	vascular endothelial growth factor receptor 1	1135	20	4.52045e-102	0.6275
9115	c10065_g1_i1	transcriptional regulatory protein pho23	867	20	5.82166e-20	0.803
9116	c10066_g1_i1	wd repeat-containing protein 3	1153	20	1.09554e-70	0.588
9117	c10067_g1_i1	---NA---	1577	0
9118	c10068_g1_i1	---NA---	543	0
9119	c10069_g1_i1	---NA---	206	0
843	c1007_g1_i1	---NA---	759	0
9120	c10070_g1_i1	---NA---	341	0
9121	c10071_g1_i1	---NA---	417	0
9122	c10071_g1_i2	---NA---	628	0
9123	c10072_g1_i1	---NA---	1023	0
9124	c10073_g1_i1	---NA---	268	0
9125	c10074_g1_i1	protein strawberry notch	1176	20	9.95119e-62	0.882
9126	c10074_g1_i2	protein strawberry notch	1242	20	3.15392e-61	0.9
9127	c10075_g1_i1	ubiquitin-like modifier-activating enzyme 5	1923	20	1.92925e-165	0.838
9128	c10075_g1_i2	ubiquitin-like modifier-activating enzyme 5	1948	20	4.23357e-175	0.7965
9129	c10078_g1_i1	---NA---	1556	0
9130	c10080_g1_i1	---NA---	368	0
9131	c10081_g1_i1	---NA---	620	0
9132	c10082_g1_i1	endophilin b	909	20	2.22365e-113	0.741
9133	c10082_g1_i2	endophilin b	1160	20	1.24234e-125	0.6785
9134	c10083_g1_i1	---NA---	437	0
9135	c10084_g1_i1	---NA---	401	0
9136	c10085_g1_i1	---NA---	337	0
9137	c10088_g1_i1	---NA---	233	0
9138	c10088_g2_i1	---NA---	911	0
844	c1009_g1_i1	---NA---	243	0
845	c1009_g1_i2	rna polymerase ii-associated protein 3	502	20	3.26447e-16	0.514
9139	c10090_g1_i1	---NA---	496	0
9140	c10095_g1_i1	---NA---	454	0
9141	c10096_g1_i1	set domain protein	724	20	1.69884e-60	0.645
9142	c10096_g1_i2	set domain protein	618	20	3.6112e-38	0.582
9143	c10096_g1_i3	set domain protein	706	20	6.16426e-61	0.637
846	c1010_g1_i1	---NA---	229	0
9144	c10100_g1_i1	---NA---	965	0
9145	c10100_g1_i2	---NA---	778	0
9146	c10100_g1_i3	---NA---	471	0
9147	c10101_g1_i1	---NA---	620	0
9148	c10101_g1_i2	---NA---	376	0
9149	c10102_g1_i1	---NA---	533	0
9150	c10102_g1_i2	---NA---	491	0
9151	c10105_g1_i1	---NA---	361	0
9152	c10105_g1_i2	---NA---	333	0
9153	c10106_g1_i1	---NA---	296	0
9154	c10106_g1_i2	---NA---	512	0
9155	c10107_g1_i1	---NA---	415	0
9156	c10108_g1_i1	---NA---	588	0
9157	c10109_g1_i1	---NA---	509	0
847	c1011_g1_i1	unc93a protein	596	20	8.48266e-61	0.685
9158	c10110_g1_i1	---NA---	284	0
9159	c10111_g1_i1	serine threonine-protein kinase d3	2772	20	0	0.7735
9160	c10111_g1_i2	serine threonine-protein kinase d3	2684	20	0	0.733
9161	c10111_g1_i3	serine threonine-protein kinase d3	2789	20	0	0.744
9162	c10112_g1_i1	---NA---	386	0
9163	c10112_g1_i2	---NA---	483	0
9164	c10113_g1_i1	---NA---	1532	0
9165	c10115_g1_i1	reverse transcriptase	391	20	1.75214e-10	0.5335
9166	c10116_g1_i1	---NA---	308	0
9167	c10117_g1_i1	---NA---	669	0
9168	c10119_g1_i1	myosin heavy chain	439	20	3.70217e-74	0.8795
9169	c10119_g1_i2	myosin heavy chain type 2	585	20	2.33239e-95	0.838
848	c1012_g1_i1	---NA---	823	0
849	c1012_g2_i1	PREDICTED: uncharacterized protein LOC101236010	280	1	7.09404e-07	0.65
9170	c10120_g1_i1	---NA---	1406	0
9171	c10120_g1_i2	---NA---	1367	0
9172	c10121_g1_i1	---NA---	238	0
9173	c10121_g2_i1	---NA---	301	0
9174	c10122_g1_i1	---NA---	1589	0
9175	c10123_g1_i1	---NA---	262	0
9176	c10124_g1_i1	sex combs partial	1645	1	1.20441e-06	0.58
9177	c10125_g1_i1	---NA---	875	0
9178	c10127_g1_i1	rna-directed dna polymerase from mobile element jockey-like	208	20	8.35341e-17	0.706
850	c1013_g1_i1	---NA---	1718	0
9179	c10130_g1_i1	---NA---	202	0
9180	c10132_g1_i1	protein tamozhennic	1374	20	1.05698e-47	0.6015
9181	c10132_g1_i2	protein tamozhennic	1379	20	1.10174e-47	0.6015
9182	c10133_g1_i1	---NA---	1177	0
9183	c10134_g1_i1	---NA---	237	0
9184	c10135_g1_i1	---NA---	743	0
9185	c10137_g1_i1	---NA---	903	0
9186	c10138_g1_i1	---NA---	1782	0
9187	c10139_g1_i1	---NA---	2387	0
9188	c10139_g1_i2	---NA---	2414	0
851	c1014_g1_i1	---NA---	509	0
9189	c10141_g1_i1	---NA---	205	0
9190	c10142_g1_i1	---NA---	633	0
9191	c10143_g1_i1	---NA---	1170	0
9192	c10143_g1_i2	---NA---	467	0
9193	c10143_g1_i3	---NA---	796	0
9194	c10146_g1_i1	---NA---	214	0
9195	c10148_g1_i1	---NA---	215	0
9196	c10149_g1_i1	---NA---	809	0
9197	c10150_g1_i1	---NA---	202	0
9198	c10151_g1_i1	tigger transposable element-derived protein 1-like isoform 1	551	1	1.53953e-06	0.51
9199	c10152_g1_i1	---NA---	784	0
9200	c10152_g2_i1	---NA---	969	0
9201	c10153_g1_i1	---NA---	587	0
9202	c10154_g1_i1	---NA---	577	0
9203	c10155_g1_i1	cg4593-pa	915	20	2.82393e-83	0.8325
9204	c10159_g1_i1	dph3 homolog	1179	20	1.24288e-17	0.8235
9205	c10159_g1_i2	dna-directed rna polymerase iii subunit rpc7-like	994	20	4.04693e-15	0.6005
9206	c10159_g1_i3	dph3 homolog	1032	20	4.20194e-18	0.8355
852	c1016_g1_i1	---NA---	739	0
853	c1016_g1_i2	---NA---	459	0
9207	c10160_g1_i1	vesicle transport protein sft2a-like	1435	20	8.6601e-58	0.7505
9208	c10160_g1_i2	vesicle transport protein sft2a-like	1544	20	1.89115e-57	0.7505
9209	c10161_g1_i1	hypothetical protein BRAFLDRAFT_125531	371	4	1.07106e-10	0.64
9210	c10161_g1_i2	prion protein	395	14	7.45702e-14	0.6264
9211	c10163_g1_i1	---NA---	281	0
9212	c10165_g1_i1	---NA---	676	0
9213	c10166_g1_i1	---NA---	757	0
9214	c10167_g1_i1	signal recognition particle 54 kda protein isoform x1	1715	20	0	0.9015
9215	c10169_g1_i1	---NA---	225	0
854	c1017_g1_i1	---NA---	317	0
855	c1017_g1_i2	---NA---	335	0
9216	c10170_g1_i1	serine arginine repetitive matrix protein 5-like isoform x1	285	20	8.01561e-14	0.705
9217	c10170_g1_i2	serine arginine repetitive matrix protein 5-like isoform x1	551	20	1.83117e-16	0.5465
9218	c10171_g1_i1	---NA---	339	0
9219	c10172_g1_i1	---NA---	481	0
9220	c10172_g1_i2	---NA---	1457	0
9221	c10173_g1_i1	---NA---	204	0
9222	c10173_g2_i1	reverse partial	816	20	3.98164e-15	0.4685
9223	c10174_g1_i1	netrin receptor unc5b-like	680	20	5.85909e-45	0.638
9224	c10174_g1_i2	netrin receptor unc5b	398	20	8.20003e-30	0.584
9225	c10175_g1_i1	barrier-to-autointegration factor	661	20	2.63758e-49	0.8785
9226	c10176_g1_i1	tbc1 domain family member cg11727-like	2423	20	0	0.7755
9227	c10176_g1_i2	tbc1 domain family member cg11727-like	2381	20	0	0.7565
9228	c10177_g1_i1	dnaj homolog subfamily a member 1	2593	20	0	0.83
9229	c10177_g1_i2	dnaj homolog subfamily a member 1	2619	20	0	0.8305
9230	c10179_g1_i1	dcn1-like protein 2	1490	20	4.42321e-134	0.8685
9231	c10179_g2_i1	---NA---	984	0
856	c1018_g1_i1	---NA---	247	0
9232	c10182_g1_i1	---NA---	1247	0
9233	c10183_g1_i1	protein phosphatase 1 regulatory subunit 12a	1390	20	1.13946e-137	0.7805
9234	c10183_g1_i2	protein phosphatase 1 regulatory subunit 12a	1318	20	2.13509e-137	0.7915
9235	c10183_g1_i3	protein phosphatase 1 regulatory subunit 12a	1351	20	3.89236e-137	0.793
9236	c10184_g1_i1	chitobiosyldiphosphodolichol beta-mannosyltransferase-like	1792	20	9.08063e-150	0.6255
9237	c10186_g1_i1	---NA---	1349	0
9238	c10188_g1_i1	bsd domain-containing protein 1-like	1465	20	6.20478e-38	0.614
9239	c10188_g1_i2	bsd domain-containing protein 1-like	1774	20	8.90909e-47	0.6125
9240	c10189_g1_i1	l _3-like	218	20	4.99582e-17	0.6965
9241	c10190_g1_i1	calcium and integrin-binding protein 1-like	895	20	1.16337e-50	0.66
9242	c10190_g1_i2	calcium and integrin-binding protein 1-like	1068	20	5.65602e-50	0.66
9243	c10192_g1_i1	---NA---	790	0
9244	c10194_g1_i1	---NA---	336	0
9245	c10195_g1_i1	---NA---	232	0
9246	c10196_g1_i1	zinc finger ccch domain-containing protein 15-like protein	3348	20	3.53948e-73	0.74
9247	c10197_g1_i1	cytoplasmic trna 2-thiolation protein 2-like	1703	20	9.46602e-70	0.4895
9248	c10198_g1_i1	---NA---	1129	0
9249	c10199_g1_i1	---NA---	304	0
98	c102_g1_i1	---NA---	225	0
857	c1020_g1_i1	---NA---	841	0
9250	c10201_g1_i1	uncharacterized fam18-like protein cg5021-like	658	20	6.62496e-61	0.6255
9251	c10201_g1_i2	uncharacterized fam18-like protein cg5021-like	772	20	1.11293e-75	0.736
9252	c10201_g1_i3	uncharacterized fam18-like protein cg5021-like	784	20	3.88435e-78	0.7335
9253	c10202_g1_i1	---NA---	558	0
9254	c10205_g1_i1	---NA---	1934	0
9255	c10208_g1_i1	---NA---	221	0
9256	c10209_g1_i1	---NA---	900	0
9257	c10209_g2_i1	---NA---	210	0
858	c1021_g1_i1	---NA---	458	0
9258	c10210_g1_i1	probable dynactin subunit 2-like	1447	20	2.41867e-98	0.601
9259	c10211_g1_i1	general transcription factor iif subunit 2-like	1671	20	1.45593e-76	0.6975
9260	c10214_g1_i1	---NA---	1116	0
9261	c10215_g1_i1	zinc finger protein 132	226	20	2.80447e-27	0.807
9262	c10215_g1_i2	zinc finger protein 132	306	20	1.6023e-37	0.7845
9263	c10215_g2_i1	partial	264	20	1.09857e-31	0.734
9264	c10216_g1_i1	---NA---	513	0
9265	c10216_g1_i2	---NA---	638	0
9266	c10217_g1_i1	---NA---	709	0
859	c1022_g1_i1	---NA---	343	0
9267	c10220_g1_i1	---NA---	229	0
9268	c10220_g2_i1	---NA---	695	0
9269	c10222_g1_i1	---NA---	472	0
9270	c10223_g1_i1	---NA---	285	0
9271	c10224_g1_i1	atp-dependent clp protease atp-binding subunit clpx- mitochondrial-like	1242	20	3.98962e-114	0.84
9272	c10225_g1_i1	---NA---	222	0
9273	c10229_g1_i1	polyprotein of retroviral	744	20	1.91225e-74	0.619
860	c1023_g1_i1	---NA---	262	0
9274	c10230_g1_i1	---NA---	399	0
9275	c10230_g1_i2	---NA---	549	0
9276	c10230_g1_i3	---NA---	592	0
9277	c10232_g1_i1	---NA---	574	0
9278	c10233_g1_i1	myosin heavy chain	257	20	6.30431e-39	0.898
9279	c10234_g1_i1	---NA---	268	0
9280	c10236_g1_i1	---NA---	508	0
9281	c10237_g1_i1	dnaj homolog subfamily c member 7-like	4614	20	5.10661e-155	0.718
9282	c10237_g1_i2	dnaj homolog subfamily c member 7-like	3457	20	2.7196e-158	0.7215
9283	c10238_g1_i1	---NA---	677	0
9284	c10239_g1_i1	slit homolog 2	1674	20	6.65581e-97	0.5445
861	c1024_g1_i1	---NA---	337	0
9285	c10240_g1_i1	---NA---	914	0
9286	c10241_g1_i1	---NA---	1125	0
9287	c10242_g1_i1	---NA---	283	0
9288	c10243_g1_i1	---NA---	394	0
9289	c10243_g2_i1	---NA---	673	0
9290	c10244_g1_i1	glycosyltransferase-like protein large1	998	20	7.8826e-158	0.8365
9291	c10245_g1_i1	netrin receptor unc5c-like	241	11	1.56402e-07	0.5364
9292	c10246_g1_i1	protein isoforms d e-like	2416	20	0	0.691
9293	c10247_g1_i1	---NA---	1220	0
9294	c10248_g1_i1	---NA---	642	0
9295	c10248_g2_i1	---NA---	207	0
9296	c10249_g1_i1	---NA---	2029	0
862	c1025_g1_i1	---NA---	516	0
9297	c10250_g1_i1	---NA---	228	0
9298	c10250_g1_i2	---NA---	253	0
9299	c10251_g1_i1	---NA---	1218	0
9300	c10251_g2_i1	---NA---	953	0
9301	c10252_g1_i1	---NA---	905	0
9302	c10253_g1_i1	---NA---	922	0
9303	c10255_g1_i1	serine threonine protein kinase	1263	3	3.3125e-09	0.4133
9304	c10256_g1_i1	---NA---	263	0
9305	c10258_g1_i1	---NA---	245	0
863	c1026_g1_i1	---NA---	225	0
9306	c10260_g1_i1	---NA---	1802	0
9307	c10260_g1_i2	---NA---	1964	0
9308	c10261_g1_i1	endophilin a	490	20	7.75868e-44	0.705
9309	c10262_g1_i1	---NA---	744	0
9310	c10263_g1_i1	probable peroxisomal acyl-coenzyme a oxidase 1-like	1870	20	0	0.6645
9311	c10263_g1_i2	probable peroxisomal acyl-coenzyme a oxidase 1-like	1411	20	0	0.7335
9312	c10265_g1_i1	---NA---	1553	0
9313	c10266_g1_i1	---NA---	323	0
9314	c10267_g1_i1	---NA---	1175	0
9315	c10268_g1_i1	eri1 exoribonuclease 3 isoform x2	380	20	6.32878e-26	0.7455
9316	c10269_g1_i1	---NA---	302	0
9317	c10269_g2_i1	---NA---	485	0
864	c1027_g1_i1	receptor-type tyrosine-protein phosphatase delta- partial	923	20	0	0.874
9318	c10270_g1_i1	---NA---	321	0
9319	c10271_g1_i1	rna-directed dna polymerase from mobile element jockey-like	276	20	3.03165e-14	0.6875
9320	c10273_g1_i1	dna polymerase epsilon subunit 3	756	20	1.95952e-28	0.884
9321	c10273_g1_i2	dna polymerase epsilon subunit 3	768	20	3.00069e-28	0.884
9322	c10275_g1_i1	---NA---	565	0
9323	c10277_g1_i1	---NA---	519	0
865	c1028_g1_i1	---NA---	762	0
9324	c10286_g1_i1	---NA---	296	0
866	c1029_g1_i1	---NA---	938	0
9325	c10290_g1_i1	---NA---	266	0
9326	c10290_g2_i1	---NA---	479	0
9327	c10292_g1_i1	---NA---	678	0
9328	c10295_g1_i1	---NA---	863	0
9329	c10297_g1_i1	rna-directed dna polymerase from mobile element jockey-like	336	20	7.1219e-09	0.545
9330	c10297_g1_i2	---NA---	318	0
9331	c10298_g1_i1	---NA---	392	0
867	c1030_g1_i1	---NA---	582	0
868	c1030_g1_i2	---NA---	691	0
9332	c10307_g1_i1	---NA---	250	0
9333	c10309_g1_i1	PREDICTED: hypothetical protein LOC100570169, partial	215	2	2.45074e-07	0.6
869	c1031_g1_i1	---NA---	292	0
9334	c10310_g1_i1	---NA---	451	0
9335	c10311_g1_i1	---NA---	537	0
9336	c10312_g1_i1	cysteine-rich motor neuron 1 protein precursor	2341	2	2.24525e-11	0.4
9337	c10312_g1_i2	hypothetical protein DAPPUDRAFT_313009	2137	1	1.86999e-10	0.44
9338	c10319_g1_i1	---NA---	355	0
870	c1032_g1_i1	---NA---	338	0
9339	c10321_g1_i1	serine threonine-protein kinase lmtk1	752	20	5.78247e-26	0.466
9340	c10321_g1_i2	serine threonine-protein kinase lmtk1	677	20	1.50613e-25	0.517
9341	c10322_g1_i1	---NA---	674	0
9342	c10324_g1_i1	---NA---	219	0
9343	c10327_g1_i1	---NA---	249	0
9344	c10328_g1_i1	---NA---	331	0
9345	c10330_g1_i1	---NA---	496	0
9346	c10332_g1_i1	---NA---	320	0
9347	c10334_g1_i1	---NA---	300	0
9348	c10336_g1_i1	---NA---	287	0
9349	c10337_g1_i1	---NA---	277	0
9350	c10338_g1_i1	---NA---	226	0
9351	c10340_g1_i1	---NA---	251	0
9352	c10340_g1_i2	---NA---	503	0
9353	c10340_g1_i3	nucleoredoxin	2183	20	2.20643e-123	0.6095
9354	c10341_g1_i1	---NA---	415	0
9355	c10342_g1_i1	integrin beta-5	1224	20	9.44893e-15	0.5385
9356	c10342_g1_i2	integrin beta-3	1229	20	1.37903e-13	0.5305
9357	c10343_g1_i1	voltage-dependent calcium channel subunit alpha-2 delta-1	489	18	8.48794e-08	0.4744
9358	c10343_g1_i2	---NA---	425	0
9359	c10343_g1_i3	---NA---	289	0
9360	c10344_g1_i1	tyrosine-protein kinase src64b-like	1551	20	3.41618e-112	0.715
9361	c10344_g1_i2	tyrosine-protein kinase src64b-like	956	20	3.97908e-113	0.716
9362	c10344_g1_i3	---NA---	664	0
9363	c10345_g1_i1	endonuclease-reverse transcriptase	1460	20	2.73671e-21	0.5685
9364	c10346_g1_i1	---NA---	306	0
9365	c10346_g1_i2	---NA---	289	0
9366	c10347_g1_i1	---NA---	526	0
9367	c10348_g1_i1	---NA---	782	0
9368	c10349_g1_i1	crustin p	262	20	2.2197e-14	0.5175
871	c1035_g1_i1	---NA---	270	0
9369	c10352_g1_i1	---NA---	248	0
9370	c10353_g1_i1	---NA---	346	0
9371	c10353_g2_i1	---NA---	1376	0
9372	c10354_g1_i1	---NA---	1086	0
9373	c10356_g1_i1	---NA---	1714	0
9374	c10357_g1_i1	---NA---	202	0
872	c1036_g1_i1	---NA---	325	0
9375	c10362_g1_i1	---NA---	291	0
9376	c10362_g2_i1	---NA---	243	0
9377	c10364_g1_i1	secernin-2 isoform x1	1775	20	2.90372e-152	0.652
9378	c10365_g1_i1	---NA---	208	0
9379	c10365_g1_i2	---NA---	244	0
9380	c10366_g1_i1	---NA---	336	0
9381	c10367_g1_i1	---NA---	668	0
9382	c10367_g1_i2	---NA---	213	0
9383	c10369_g1_i1	---NA---	231	0
873	c1037_g1_i1	---NA---	275	0
9384	c10371_g1_i1	alanine aminotransferase	1076	20	5.04435e-169	0.8145
9385	c10372_g1_i1	---NA---	355	0
9386	c10372_g2_i1	---NA---	393	0
9387	c10374_g1_i1	---NA---	254	0
9388	c10377_g1_i1	---NA---	262	0
9389	c10378_g1_i1	---NA---	250	0
9390	c10378_g1_i2	---NA---	230	0
9391	c10379_g1_i1	---NA---	216	0
9392	c10379_g1_i2	---NA---	207	0
874	c1038_g1_i1	---NA---	3094	0
9393	c10382_g1_i1	---NA---	534	0
9394	c10382_g1_i2	---NA---	506	0
9395	c10385_g1_i1	---NA---	453	0
9396	c10386_g1_i1	---NA---	313	0
9397	c10388_g1_i1	protein still isoforms c sif type 2- partial	634	20	1.46417e-76	0.7
9398	c10388_g1_i2	protein still isoforms c sif type 2- partial	486	20	1.80824e-64	0.8865
9399	c10391_g1_i1	---NA---	233	0
9400	c10392_g1_i1	---NA---	354	0
9401	c10394_g1_i1	---NA---	285	0
9402	c10395_g1_i1	---NA---	269	0
9403	c10395_g1_i2	---NA---	314	0
9404	c10395_g1_i3	---NA---	279	0
9405	c10396_g1_i1	hypothetical protein IscW_ISCW001881	1390	1	1.78924e-16	0.62
9406	c10396_g1_i2	hypothetical protein IscW_ISCW001881	1501	1	1.73265e-16	0.62
9407	c10398_g1_i1	---NA---	1354	0
9408	c10399_g1_i1	---NA---	243	0
9409	c10399_g2_i1	inositol hexakisphosphate and diphosphoinositol-pentakisphosphate kinase-like	1074	20	1.51602e-103	0.9305
9410	c10402_g1_i1	---NA---	217	0
9411	c10403_g1_i1	---NA---	1537	0
9412	c10406_g1_i1	---NA---	226	0
9413	c10406_g1_i2	---NA---	205	0
9414	c10407_g1_i1	---NA---	229	0
9415	c10408_g1_i1	---NA---	862	0
9416	c10408_g2_i1	---NA---	314	0
9417	c10409_g1_i1	---NA---	402	0
875	c1041_g1_i1	---NA---	967	0
9418	c10415_g1_i1	---NA---	356	0
9419	c10416_g1_i1	myosin heavy chain	361	20	2.9714e-46	0.9005
9420	c10416_g1_i2	myosin heavy chain type ii	347	20	3.23279e-74	0.9435
9421	c10419_g1_i1	unknown	244	1	2.14584e-09	0.79
9422	c10423_g1_i1	sodium hydrogen exchanger 8	1001	20	1.81912e-40	0.8085
9423	c10424_g1_i1	atp-dependent rna helicase me31b-like	2023	20	0	0.903
9424	c10424_g1_i2	atp-dependent rna helicase me31b-like	2174	20	0	0.903
9425	c10425_g1_i1	---NA---	1059	0
9426	c10425_g2_i1	---NA---	346	0
9427	c10425_g3_i1	---NA---	325	0
9428	c10426_g1_i1	---NA---	881	0
9429	c10428_g1_i1	---NA---	996	0
9430	c10429_g1_i1	glyoxylate reductase hydroxypyruvate reductase	1382	20	1.87761e-122	0.7185
9431	c10431_g1_i1	---NA---	277	0
9432	c10431_g1_i2	---NA---	294	0
9433	c10438_g1_i1	---NA---	629	0
876	c1044_g1_i1	---NA---	243	0
9434	c10440_g1_i1	---NA---	407	0
9435	c10445_g1_i1	---NA---	236	0
9436	c10445_g1_i2	---NA---	209	0
9437	c10448_g1_i1	uroporphyrinogen iii synthase	1178	20	2.6977e-42	0.52
9438	c10448_g1_i2	uroporphyrinogen iii synthase	1049	20	4.34866e-42	0.5205
9439	c10452_g1_i1	ubiquitin carboxyl-terminal hydrolase 32	355	12	1.08619e-14	0.5567
9440	c10452_g1_i2	---NA---	397	0
9441	c10452_g1_i3	PREDICTED: uncharacterized protein LOC101853362 isoform X2	206	3	1.16066e-07	0.6367
9442	c10456_g1_i1	---NA---	201	0
9443	c10457_g1_i1	---NA---	297	0
877	c1046_g1_i1	---NA---	210	0
9444	c10461_g1_i1	---NA---	973	0
9445	c10471_g1_i1	60s ribosomal protein l23a	1047	20	9.64128e-63	0.872
9446	c10476_g1_i1	---NA---	609	0
9447	c10479_g1_i1	rna-directed dna polymerase from mobile element jockey-like	1366	20	1.75247e-20	0.5045
878	c1048_g1_i1	---NA---	915	0
9448	c10480_g1_i1	---NA---	1120	0
9449	c10481_g1_i1	---NA---	249	0
9450	c10482_g1_i1	---NA---	317	0
9451	c10482_g2_i1	---NA---	1564	0
9452	c10483_g1_i1	---NA---	216	0
9453	c10484_g1_i1	---NA---	271	0
9454	c10485_g1_i1	---NA---	453	0
9455	c10486_g1_i1	eukaryotic translation initiation factor 2a	3715	20	1.09748e-114	0.554
9456	c10487_g1_i1	---NA---	955	0
9457	c10488_g1_i1	---NA---	360	0
9458	c10488_g2_i1	---NA---	613	0
9459	c10488_g3_i1	---NA---	798	0
9460	c10490_g1_i1	negative elongation factor b-like	532	20	3.22118e-68	0.8595
9461	c10490_g1_i2	negative elongation factor b-like	622	20	1.70393e-79	0.868
9462	c10491_g1_i1	legumain	1093	20	5.56356e-89	0.589
9463	c10491_g2_i1	legumain	1393	20	1.27623e-82	0.575
9464	c10492_g1_i1	---NA---	1100	0
9465	c10492_g1_i2	---NA---	1524	0
9466	c10493_g1_i1	---NA---	2219	0
9467	c10494_g1_i1	---NA---	1328	0
9468	c10495_g1_i1	retinol dehydrogenase 14-like	1985	20	3.83679e-75	0.6295
9469	c10496_g1_i1	rna-directed dna polymerase from mobile element jockey-like	1277	20	1.83147e-16	0.6205
9470	c10496_g1_i2	rna-directed dna polymerase from mobile element jockey-like	736	20	4.13314e-09	0.546
9471	c10496_g1_i3	rna-directed dna polymerase from mobile element jockey-like	1276	20	9.11879e-18	0.6205
9472	c10497_g1_i1	heat shock protein	1209	20	3.03711e-113	0.832
9473	c10498_g1_i1	semaphorin-1a-like	5148	20	0	0.636
9474	c10498_g1_i2	semaphorin-1a	5379	20	0	0.632
9475	c10499_g1_i1	---NA---	1341	0
99	c105_g1_i1	---NA---	919	0
879	c1050_g1_i1	---NA---	428	0
9476	c10500_g1_i1	splicing factor u2af 38 kda subunit	1017	20	5.41392e-91	0.8255
9477	c10503_g1_i1	coatomer subunit beta	3193	20	0	0.8545
9478	c10503_g1_i2	coatomer subunit beta	3643	20	0	0.8495
9479	c10504_g1_i1	---NA---	239	0
9480	c10505_g1_i1	---NA---	205	0
9481	c10505_g1_i2	---NA---	207	0
9482	c10506_g1_i1	---NA---	395	0
9483	c10508_g1_i1	---NA---	494	0
9484	c10509_g1_i1	dnaj homolog subfamily b member 11-like	2719	20	3.91674e-167	0.828
9485	c10509_g1_i2	dnaj homolog subfamily b member 11-like	2713	20	3.7023e-167	0.828
880	c1051_g1_i1	---NA---	470	0
9486	c10510_g1_i1	---NA---	421	0
9487	c10511_g1_i1	retinol dehydrogenase 13	1568	20	3.796e-80	0.674
9488	c10512_g1_i1	---NA---	470	0
9489	c10513_g1_i1	palmitoyltransferase zdhhc2	2407	20	1.043e-143	0.749
9490	c10513_g1_i2	---NA---	1075	0
9491	c10514_g1_i1	cytohesin-1-like isoform 2	1668	20	0	0.898
9492	c10514_g1_i2	cytohesin-1-like isoform 1	1749	20	0	0.8925
9493	c10514_g1_i3	cytohesin-1-like isoform 1	1979	20	0	0.9
9494	c10515_g1_i1	atp-dependent protease la	1366	20	2.80899e-153	0.8145
9495	c10515_g1_i2	lon protease mitochondrial-like	3060	20	0	0.794
9496	c10515_g1_i3	atp-dependent protease la	1580	20	0	0.836
9497	c10516_g1_i1	---NA---	307	0
9498	c10518_g1_i1	---NA---	397	0
9499	c10518_g1_i2	---NA---	394	0
9500	c10518_g1_i3	---NA---	552	0
9501	c10519_g1_i1	peptidyl-glycine alpha-amidating monooxygenase	2912	20	2.67457e-179	0.519
881	c1052_g1_i1	---NA---	592	0
9502	c10520_g1_i1	---NA---	1121	0
9503	c10520_g1_i2	---NA---	1523	0
9504	c10521_g1_i1	protein asteroid-like	2632	20	2.51299e-12	0.455
9505	c10521_g2_i1	---NA---	214	0
9506	c10522_g1_i1	---NA---	812	0
9507	c10523_g1_i1	---NA---	609	0
9508	c10526_g1_i1	---NA---	407	0
9509	c10527_g1_i1	tata-binding protein-associated factor 2n-like	276	1	2.42064e-07	0.71
9510	c10529_g1_i1	---NA---	363	0
9511	c10529_g1_i2	---NA---	217	0
882	c1053_g1_i1	transcription factor hes-	306	20	4.86903e-25	0.894
9512	c10530_g1_i1	---NA---	246	0
9513	c10531_g1_i1	galactosylceramide sulfotransferase-like	2336	20	6.15131e-60	0.506
9514	c10531_g1_i2	galactosylceramide sulfotransferase-like	2321	20	3.57839e-60	0.508
9515	c10531_g1_i3	galactosylceramide sulfotransferase-like	2351	20	7.23419e-60	0.506
9516	c10532_g1_i1	---NA---	470	0
9517	c10532_g1_i2	---NA---	840	0
9518	c10532_g1_i3	---NA---	267	0
9519	c10532_g1_i4	tigger transposable element-derived protein 1-like	829	1	3.71235e-07	0.61
9520	c10533_g1_i1	peptide methionine sulfoxide	833	20	5.28736e-79	0.6815
9521	c10534_g1_i1	---NA---	298	0
9522	c10535_g1_i1	---NA---	496	0
9523	c10535_g1_i2	---NA---	585	0
9524	c10535_g1_i3	---NA---	608	0
9525	c10536_g1_i1	---NA---	447	0
9526	c10536_g2_i1	---NA---	220	0
9527	c10537_g1_i1	---NA---	560	0
9528	c10537_g1_i2	---NA---	346	0
9529	c10538_g1_i1	39s ribosomal protein mitochondrial-like	733	20	8.22355e-47	0.663
9530	c10539_g1_i1	---NA---	209	0
883	c1054_g1_i1	---NA---	1933	0
9531	c10540_g1_i1	---NA---	393	0
9532	c10541_g1_i1	probable 28s ribosomal protein mitochondrial-like	494	20	9.55597e-17	0.611
9533	c10541_g1_i2	mitochondrial ribosomal protein s26	807	20	2.26097e-36	0.6005
9534	c10542_g1_i1	Uncharacterized protein C1orf131-like protein	2182	12	9.0845e-11	0.6725
9535	c10544_g1_i1	---NA---	550	0
9536	c10545_g1_i1	---NA---	408	0
9537	c10546_g1_i1	---NA---	208	0
9538	c10546_g1_i2	---NA---	254	0
9539	c10547_g1_i1	tigger transposable element-derived protein 1-like	493	20	5.99414e-14	0.6555
9540	c10548_g1_i1	hypothetical protein NEMVEDRAFT_v1g222522	2006	1	4.63767e-08	0.51
9541	c10549_g1_i1	cadherin 88c	1563	20	1.86863e-115	0.7185
9542	c10549_g1_i2	cadherin 88c	1330	20	3.34959e-142	0.6935
884	c1055_g1_i1	---NA---	313	0
885	c1055_g2_i1	---NA---	253	0
9543	c10550_g1_i1	cklf-like marvel transmembrane domain-containing protein 4	940	17	6.84707e-25	0.5388
9544	c10550_g1_i2	synaptophysin synaptoporin family protein	1028	20	8.07196e-29	0.5455
9545	c10551_g1_i1	low quality protein: polycomb protein sfmbt	945	20	4.3526e-41	0.799
9546	c10551_g1_i2	low quality protein: polycomb protein sfmbt	930	20	4.25723e-41	0.8005
9547	c10553_g1_i1	---NA---	323	0
9548	c10554_g1_i1	---NA---	513	0
9549	c10554_g1_i2	---NA---	532	0
9550	c10557_g1_i1	cyclic amp-dependent transcription factor atf-2 isoform x5	2778	20	3.96359e-43	0.5455
9551	c10557_g1_i2	cyclic amp-dependent transcription factor atf-2	2618	20	1.1563e-26	0.6745
9552	c10558_g1_i1	---NA---	1107	0
9553	c10559_g1_i1	teneurin-3-like isoform 1	724	20	1.69761e-26	0.8365
886	c1056_g1_i1	---NA---	258	0
9554	c10561_g1_i1	---NA---	409	0
9555	c10562_g1_i1	---NA---	2346	0
9556	c10563_g1_i1	-cyclic-nucleotide 2-	1568	20	0	0.7545
9557	c10563_g1_i2	-cyclic-nucleotide 2-	1465	20	0	0.7545
9558	c10564_g1_i1	carboxyl-terminal pdz ligand of neuronal nitric oxide synthase protein	1096	20	2.38587e-81	0.6765
9559	c10564_g2_i1	---NA---	435	0
9560	c10565_g1_i1	epidermal retinol dehydrogenase 2-like	1180	20	2.65909e-107	0.676
9561	c10565_g1_i2	epidermal retinol dehydrogenase 2-like	1298	20	6.31426e-106	0.68
9562	c10566_g1_i1	---NA---	1063	0
9563	c10566_g1_i2	---NA---	388	0
9564	c10567_g1_i1	aael011377- partial	431	20	3.21658e-28	0.7795
9565	c10567_g1_i2	zgc:162898 protein	332	20	3.7716e-14	0.722
9566	c10567_g1_i3	isoform b	465	20	3.63346e-49	0.7495
9567	c10568_g1_i1	zinc finger protein 277	476	20	1.45818e-08	0.685
9568	c10568_g1_i2	zinc finger protein	1277	20	4.00835e-82	0.6
9569	c10569_g1_i1	pickel cg14779-pa	2251	20	2.3548e-57	0.649
9570	c10569_g1_i2	pickel cg14779-pa	1958	20	5.46474e-56	0.649
887	c1057_g1_i1	baculoviral iap repeat-containing protein 6	737	20	1.11278e-35	0.527
9571	c10571_g1_i1	---NA---	398	0
9572	c10571_g1_i2	---NA---	378	0
9573	c10572_g1_i1	---NA---	243	0
9574	c10573_g1_i1	rna-binding protein lark	1819	20	8.85374e-43	0.642
9575	c10574_g1_i1	apolipoprotein d-like	797	20	5.76521e-35	0.552
9576	c10575_g1_i1	---NA---	386	0
9577	c10575_g2_i1	---NA---	461	0
9578	c10577_g1_i1	solute carrier family 12 member 9-like	2901	20	0	0.66
9579	c10577_g1_i2	solute carrier family 12 member 9-like	2970	20	0	0.642
9580	c10578_g1_i1	---NA---	1224	0
9581	c10579_g1_i1	---NA---	527	0
888	c1058_g1_i1	---NA---	238	0
9582	c10581_g1_i1	---NA---	374	0
9583	c10582_g1_i1	conserved hypothetical protein	3438	20	2.85764e-119	0.581
9584	c10582_g1_i2	conserved hypothetical protein	3502	20	2.12781e-119	0.5815
9585	c10582_g1_i3	hypothetical protein HELRODRAFT_185164	2856	20	1.31691e-56	0.642
9586	c10583_g1_i1	---NA---	651	0
9587	c10583_g1_i2	---NA---	668	0
9588	c10584_g1_i1	comm domain-containing protein 8	603	20	9.63262e-12	0.4935
9589	c10584_g2_i1	---NA---	1152	0
9590	c10585_g1_i1	carbohydrate sulfotransferase 11-like	2265	20	6.103e-74	0.619
9591	c10586_g1_i1	---NA---	1892	0
9592	c10587_g1_i1	---NA---	2247	0
9593	c10587_g1_i2	---NA---	2317	0
9594	c10588_g1_i1	hypothetical protein EAI_16569	2089	20	7.82348e-92	0.5775
9595	c10589_g1_i1	---NA---	464	0
9596	c10589_g1_i2	---NA---	746	0
9597	c10589_g2_i1	---NA---	1537	0
889	c1059_g1_i1	cg2446	1609	20	1.71314e-89	0.6705
9598	c10591_g1_i1	---NA---	261	0
9599	c10592_g1_i1	---NA---	832	0
9600	c10592_g1_i2	---NA---	890	0
9601	c10593_g1_i1	dual 3 -cyclic-amp and -gmp	638	3	4.61355e-12	0.7233
9602	c10594_g1_i1	---NA---	490	0
9603	c10594_g1_i2	---NA---	525	0
9604	c10594_g1_i3	---NA---	627	0
9605	c10595_g1_i1	phosphatidylcholine:ceramide cholinephosphotransferase 1-like isoform 1	775	20	1.07785e-31	0.5425
9606	c10596_g1_i1	---NA---	585	0
9607	c10597_g1_i1	methyltransferase-like protein 4-like	1753	20	9.29115e-49	0.563
9608	c10597_g1_i2	methyltransferase-like protein 4-like	1508	20	5.85996e-49	0.5645
9609	c10597_g1_i3	methyltransferase-like protein 4-like	1740	20	4.86827e-35	0.639
9610	c10598_g1_i1	---NA---	945	0
9611	c10599_g1_i1	proteasome subunit beta type-7-like	1261	20	1.53638e-129	0.8015
100	c106_g1_i1	retrotransposable element tf2 155 kda protein type 1	249	20	1.07787e-20	0.6365
890	c1060_g1_i1	---NA---	411	0
9612	c10600_g1_i1	ubiquitin-protein ligase e3a	3187	20	0	0.6525
9613	c10601_g1_i1	---NA---	311	0
9614	c10601_g2_i1	---NA---	665	0
9615	c10601_g3_i1	---NA---	390	0
9616	c10602_g1_i1	pol-like protein	2921	20	6.34141e-67	0.4415
9617	c10603_g1_i1	clathrin light chain	915	20	1.05645e-60	0.6475
9618	c10603_g1_i2	clathrin light chain	876	20	1.30445e-64	0.657
9619	c10603_g1_i3	clathrin light chain	870	20	3.51277e-61	0.6465
9620	c10604_g1_i1	transcription factor capicua	2950	20	5.17484e-44	0.6445
9621	c10604_g1_i2	transcription factor capicua	2820	20	5.14051e-44	0.6435
9622	c10605_g1_i1	---NA---	328	0
9623	c10605_g2_i1	ficolin-like protein 2	1343	20	2.94793e-48	0.56
9624	c10605_g3_i1	---NA---	1285	0
9625	c10606_g1_i1	---NA---	248	0
9626	c10606_g2_i1	---NA---	1623	0
9627	c10606_g3_i1	---NA---	567	0
9628	c10607_g1_i1	protein gdap2 homolog	1485	20	3.34025e-159	0.7405
9629	c10607_g1_i2	protein gdap2 homolog	1381	20	2.12579e-102	0.801
9630	c10608_g1_i1	---NA---	238	0
9631	c10609_g1_i1	---NA---	1454	0
891	c1061_g1_i1	---NA---	593	0
9632	c10610_g1_i1	---NA---	769	0
9633	c10610_g2_i1	---NA---	235	0
9634	c10611_g1_i1	myelin proteolipid	2915	20	3.45467e-125	0.7545
9635	c10611_g1_i2	myelin proteolipid	2773	20	1.8344e-50	0.766
9636	c10612_g1_i1	pol-like protein	4784	20	2.42432e-25	0.508
9637	c10615_g1_i1	---NA---	617	0
9638	c10615_g1_i2	---NA---	661	0
9639	c10616_g1_i1	casein kinase ii subunit beta	1219	20	4.80437e-139	0.937
9640	c10616_g1_i2	casein kinase ii subunit beta	1145	20	6.01026e-91	0.937
9641	c10617_g1_i1	---NA---	501	0
9642	c10618_g1_i1	calcium-transporting atpase sarcoplasmic endoplasmic reticulum type-like	3903	20	0	0.9175
9643	c10618_g1_i2	calcium-transporting atpase sarcoplasmic endoplasmic reticulum type-like	4148	20	0	0.918
9644	c10618_g1_i3	calcium-transporting atpase sarcoplasmic endoplasmic reticulum type-like	3588	20	0	0.918
9645	c10619_g1_i1	---NA---	564	0
9646	c10619_g1_i2	---NA---	359	0
9647	c10620_g1_i1	golgin subfamily a member 5	2574	20	2.11825e-114	0.621
9648	c10620_g1_i2	golgin subfamily a member 5	2562	20	1.92638e-114	0.621
9649	c10621_g1_i1	e3 ubiquitin-protein ligase rnf13-like	1960	20	2.92388e-103	0.6755
9650	c10623_g1_i1	hydroxyacylglutathione mitochondrial-like	2008	20	3.38536e-118	0.7445
9651	c10623_g1_i2	hydroxyacylglutathione mitochondrial-like	1881	20	1.02654e-118	0.7445
9652	c10623_g1_i3	hydroxyacylglutathione mitochondrial isoform x1	1915	20	1.90657e-109	0.765
9653	c10624_g1_i1	c-type lectin	2495	15	1.34666e-09	0.4487
9654	c10624_g1_i2	c-type lectin	2567	15	1.40119e-09	0.4487
9655	c10626_g1_i1	rho guanyl-nucleotide exchange factor	5522	20	0	0.544
9656	c10628_g1_i1	---NA---	470	0
9657	c10630_g1_i1	protein fam136a-like	423	20	4.11042e-32	0.73
9658	c10630_g1_i2	protein fam136a-like	392	20	5.71395e-32	0.7265
9659	c10630_g1_i3	protein fam136a-like	1114	20	3.23611e-43	0.7145
9660	c10631_g1_i1	---NA---	2443	0
9661	c10632_g1_i1	poly -specific endoribonuclease homolog	2037	20	2.80678e-64	0.646
9662	c10633_g1_i1	---NA---	1376	0
9663	c10634_g1_i1	eh domain-containing protein 1	3613	20	0	0.8675
9664	c10634_g1_i2	eh domain-containing protein 1-like	3614	20	0	0.885
9665	c10635_g1_i1	scan domain-containing protein 3-like	2090	20	1.38587e-49	0.629
9666	c10636_g1_i1	PREDICTED: uncharacterized protein LOC575262	430	8	1.38617e-08	0.5088
9667	c10637_g1_i1	cg8844	535	20	9.76624e-76	0.7885
9668	c10638_g1_i1	---NA---	264	0
9669	c10639_g1_i1	growth inhibition and differentiation-related protein 88-like protein	3721	20	4.61455e-58	0.728
9670	c10639_g1_i2	growth inhibition and differentiation-related protein 88-like protein	3625	20	4.00004e-58	0.728
892	c1064_g1_i1	complex iii assembly factor lyrm7-like	853	20	9.64002e-24	0.669
9671	c10641_g1_i1	---NA---	398	0
9672	c10641_g2_i1	---NA---	686	0
9673	c10642_g1_i1	bromodomain-containing protein 8	1054	20	7.51416e-34	0.643
9674	c10642_g1_i2	bromodomain-containing protein 8	987	20	3.53075e-33	0.662
9675	c10643_g1_i1	protein mo25	2618	20	0	0.906
9676	c10643_g1_i2	protein mo25	2597	20	0	0.906
9677	c10644_g1_i1	---NA---	1845	0
9678	c10645_g1_i1	---NA---	296	0
9679	c10645_g2_i1	---NA---	590	0
9680	c10646_g1_i1	---NA---	212	0
9681	c10648_g1_i1	---NA---	364	0
9682	c10648_g1_i2	---NA---	299	0
893	c1065_g1_i1	---NA---	216	0
9683	c10650_g1_i1	---NA---	277	0
9684	c10650_g2_i1	---NA---	2124	0
9685	c10651_g1_i1	calmodulin	3630	20	2.12309e-91	0.979
9686	c10651_g1_i2	calmodulin	3725	20	1.56812e-91	0.985
9687	c10653_g1_i1	probable histone-binding protein caf1-like	1721	20	0	0.9755
9688	c10653_g1_i2	cg4236	1694	20	0	0.9755
9689	c10654_g1_i1	signal recognition particle 72 kda	2418	20	1.25976e-173	0.6305
9690	c10654_g2_i1	---NA---	1495	0
9691	c10655_g1_i1	---NA---	2058	0
9692	c10656_g1_i1	---NA---	206	0
9693	c10657_g1_i1	---NA---	284	0
9694	c10658_g1_i1	---NA---	202	0
9695	c10659_g1_i1	ell-associated factor eaf-like	769	20	1.38533e-29	0.6385
9696	c10659_g1_i2	ell-associated factor eaf-like	1037	20	3.00281e-41	0.6305
9697	c10660_g1_i1	methionine aminopeptidase 2 isoform x2	2184	20	0	0.861
9698	c10661_g1_i1	hypothetical protein GLOINDRAFT_4351, partial	765	1	6.77995e-07	0.45
9699	c10662_g1_i1	e3 ubiquitin-protein ligase rnf126-like	2159	20	1.74703e-54	0.5345
9700	c10663_g1_i1	transmembrane gtpase marf-like	2471	20	0	0.7545
9701	c10663_g1_i2	transmembrane gtpase marf-like	2436	20	0	0.7545
9702	c10664_g1_i1	---NA---	1277	0
9703	c10665_g1_i1	---NA---	668	0
9704	c10666_g1_i1	---NA---	748	0
9706	c10666_g1_i2	---NA---	273	0
9705	c10666_g2_i1	---NA---	438	0
9707	c10667_g1_i1	ww domain-containing adapter protein with coiled-coil	3672	20	1.47647e-46	0.6595
9708	c10670_g1_i1	transmembrane protein 115-like	2511	20	1.68736e-129	0.743
9709	c10670_g1_i2	transmembrane protein 115-like	2562	20	2.59656e-129	0.743
9710	c10671_g1_i1	ns1 binding protein	1692	20	2.59622e-147	0.5855
9711	c10671_g1_i2	ns1 binding protein	2211	20	5.17826e-145	0.5845
9712	c10672_g1_i1	zinc finger protein on ecdysone puffs	2820	17	6.48521e-11	0.5194
9713	c10673_g1_i1	y+l amino acid transporter 2-like	1919	20	0	0.8205
9714	c10673_g1_i2	y+l amino acid transporter 2-like	1793	20	1.64451e-174	0.7425
9715	c10676_g1_i1	f-box lrr-repeat protein 2	2618	20	1.0036e-52	0.493
9716	c10677_g1_i1	isoform a	3784	20	4.22233e-166	0.6725
9717	c10677_g1_i2	isoform a	3796	20	8.48971e-167	0.673
9718	c10678_g1_i1	ero1-like protein	2015	20	2.24723e-177	0.7045
9719	c10678_g1_i2	ero1-like protein	2339	20	6.1121e-180	0.698
9720	c10679_g1_i1	isoform b	1563	20	6.81317e-38	0.915
894	c1068_g1_i1	protein unzipped-like	2646	20	3.84011e-24	0.421
9721	c10680_g1_i1	39s ribosomal protein mitochondrial-like	2029	20	7.8284e-20	0.659
9722	c10680_g1_i2	39s ribosomal protein mitochondrial-like	2363	20	1.12471e-19	0.659
9723	c10681_g1_i1	---NA---	252	0
9724	c10681_g1_i2	---NA---	216	0
9725	c10681_g1_i3	---NA---	473	0
9726	c10682_g1_i1	tigger transposable element-derived protein 1-like	690	20	3.89695e-11	0.49
9727	c10683_g1_i1	low-density lipoprotein receptor-related protein 6	2778	20	0	0.7705
9728	c10683_g1_i2	low-density lipoprotein receptor-related protein 6 isoform 2	2795	20	0	0.7595
9729	c10684_g1_i1	---NA---	238	0
9730	c10685_g1_i1	---NA---	332	0
9731	c10685_g2_i1	---NA---	286	0
9732	c10687_g1_i1	39s ribosomal protein mitochondrial-like	788	20	1.03571e-25	0.6775
9733	c10688_g1_i1	---NA---	277	0
895	c1069_g1_i1	---NA---	293	0
9734	c10690_g1_i1	---NA---	363	0
9735	c10690_g1_i2	---NA---	319	0
9736	c10697_g1_i1	nucleoside diphosphate kinase-like protein 5	1460	20	5.64279e-68	0.7225
101	c107_g1_i1	---NA---	217	0
9737	c10701_g1_i1	---NA---	242	0
9738	c10704_g1_i1	---NA---	377	0
9739	c10705_g1_i1	---NA---	411	0
9740	c10706_g1_i1	rna-directed dna polymerase from mobile element jockey-like	280	20	1.42936e-10	0.564
9741	c10710_g1_i1	---NA---	766	0
9742	c10712_g1_i1	---NA---	455	0
9743	c10712_g2_i1	---NA---	482	0
9744	c10715_g1_i1	---NA---	249	0
896	c1072_g1_i1	---NA---	572	0
9745	c10720_g1_i1	polyadenylate-binding protein-interacting protein 1	2727	20	1.0657e-34	0.523
9746	c10724_g1_i1	---NA---	302	0
9747	c10725_g1_i1	---NA---	426	0
9748	c10725_g2_i1	---NA---	352	0
9749	c10727_g1_i1	---NA---	312	0
9750	c10727_g2_i1	---NA---	243	0
9751	c10729_g1_i1	---NA---	504	0
897	c1073_g1_i1	---NA---	210	0
9752	c10730_g1_i1	breast cancer metastasis-	287	3	1.02199e-07	0.71
9753	c10732_g1_i1	---NA---	280	0
9754	c10733_g1_i1	---NA---	378	0
9755	c10733_g1_i2	---NA---	1197	0
9756	c10738_g1_i1	---NA---	435	0
9757	c10740_g1_i1	---NA---	323	0
9758	c10743_g1_i1	---NA---	535	0
9759	c10745_g1_i1	---NA---	398	0
898	c1075_g1_i1	---NA---	251	0
9760	c10751_g1_i1	set and mynd domain-containing protein 3-like	293	20	1.59809e-14	0.6665
9761	c10751_g1_i2	set and mynd domain-containing protein 3	378	20	1.96815e-30	0.641
9762	c10758_g1_i1	---NA---	452	0
899	c1076_g1_i1	---NA---	291	0
9763	c10761_g1_i1	---NA---	218	0
9764	c10761_g1_i2	---NA---	232	0
9765	c10763_g1_i1	---NA---	543	0
9766	c10769_g1_i1	---NA---	301	0
900	c1077_g1_i1	---NA---	993	0
9767	c10772_g1_i1	---NA---	361	0
9768	c10773_g1_i1	---NA---	306	0
9769	c10777_g1_i1	---NA---	457	0
9770	c10777_g1_i2	transforming growth factor-beta receptor-associated protein 1	1251	20	4.66524e-77	0.58
9771	c10777_g1_i3	transforming growth factor-beta receptor-associated protein 1	1386	20	4.90918e-92	0.5805
9772	c10779_g1_i1	---NA---	421	0
901	c1078_g1_i1	acyl- dehydrogenase -like	2407	20	0	0.6975
9773	c10781_g1_i1	---NA---	227	0
9774	c10782_g1_i1	mitochondrial nadh-ubiquinone oxidoreductase 9 kda subunit-like protein	337	14	2.95827e-09	0.6986
9775	c10782_g1_i2	mitochondrial nadh-ubiquinone oxidoreductase 9 kda subunit-like protein	362	14	3.51752e-09	0.6986
9776	c10783_g1_i1	---NA---	703	0
9777	c10783_g1_i2	---NA---	673	0
9778	c10785_g1_i1	---NA---	212	0
9779	c10788_g1_i1	---NA---	350	0
902	c1079_g1_i1	---NA---	681	0
9780	c10790_g1_i1	---NA---	421	0
9781	c10796_g1_i1	---NA---	468	0
9782	c10797_g1_i1	predicted protein	454	4	5.17693e-09	0.4825
9783	c10797_g1_i2	---NA---	320	0
9784	c10798_g1_i1	protein cbg24966	441	4	3.68696e-10	0.58
9785	c10799_g1_i1	ribosomal protein mitochondrial-like	466	20	1.22457e-21	0.6175
9786	c10799_g1_i2	ribosomal protein mitochondrial-like	522	17	1.5073e-13	0.6388
102	c108_g1_i1	---NA---	210	0
903	c1080_g1_i1	protein pdi-3	416	20	2.05172e-14	0.689
9787	c10800_g1_i1	---NA---	232	0
9788	c10801_g1_i1	---NA---	572	0
9789	c10803_g1_i1	---NA---	234	0
9790	c10803_g1_i2	---NA---	208	0
9791	c10806_g1_i1	---NA---	396	0
9792	c10806_g2_i1	---NA---	1291	0
9793	c10809_g1_i1	---NA---	215	0
9794	c10816_g1_i1	---NA---	236	0
9795	c10816_g1_i2	---NA---	545	0
9796	c10816_g2_i1	---NA---	476	0
9797	c10817_g1_i1	---NA---	267	0
9798	c10821_g1_i1	---NA---	237	0
9799	c10822_g1_i1	jmjc domain-containing protein 8-like	861	20	1.05822e-74	0.75
9800	c10822_g1_i2	jmjc domain-containing protein 8-like	762	20	6.30473e-58	0.6965
9801	c10824_g1_i1	---NA---	284	0
9802	c10826_g1_i1	heat shock cognate 71 kda partial	772	20	6.00225e-168	0.961
9803	c10827_g1_i1	---NA---	266	0
904	c1083_g1_i1	---NA---	251	0
9804	c10830_g1_i1	solute carrier family 30 (zinc transporter) member 2	1396	20	4.06345e-101	0.688
9805	c10830_g1_i2	zinc transporter 2-like	1694	20	3.60916e-100	0.685
905	c1084_g1_i1	---NA---	251	0
9806	c10840_g1_i1	40s ribosomal protein s26	455	20	3.4731e-55	0.879
9807	c10840_g1_i2	40s ribosomal protein s26	433	20	3.30579e-55	0.874
9808	c10840_g1_i3	40s ribosomal protein s26	448	20	3.10564e-55	0.879
9809	c10842_g1_i1	---NA---	210	0
9810	c10845_g1_i1	---NA---	239	0
9811	c10846_g1_i1	---NA---	448	0
9812	c10849_g1_i1	inositol -triphosphate kinase isoform a	364	20	1.29899e-14	0.56
9813	c10852_g1_i1	protein translation factor sui1 homolog	1475	20	5.18613e-63	0.9425
9814	c10854_g1_i1	---NA---	449	0
9815	c10855_g1_i1	hypothetical protein HELRODRAFT_182398	214	6	2.02377e-09	0.5433
9816	c10858_g1_i1	---NA---	323	0
9817	c10859_g1_i1	---NA---	326	0
9818	c10862_g1_i1	---NA---	487	0
9819	c10862_g2_i1	---NA---	461	0
9820	c10863_g1_i1	hypothetical protein MDA_GLEAN10011208	285	6	6.8452e-10	0.5067
9821	c10866_g1_i1	---NA---	380	0
9822	c10866_g2_i1	---NA---	387	0
9823	c10868_g1_i1	---NA---	207	0
9824	c10869_g1_i1	---NA---	356	0
906	c1087_g1_i1	---NA---	217	0
907	c1087_g1_i2	---NA---	201	0
9825	c10871_g1_i1	---NA---	383	0
9826	c10872_g1_i1	---NA---	204	0
9827	c10874_g1_i1	---NA---	279	0
9828	c10874_g1_i2	---NA---	226	0
9829	c10877_g1_i1	---NA---	397	0
9830	c10878_g1_i1	---NA---	313	0
9831	c10878_g2_i1	---NA---	865	0
9832	c10879_g1_i1	---NA---	237	0
9833	c10879_g2_i1	---NA---	251	0
9834	c10885_g1_i1	---NA---	215	0
9835	c10888_g1_i1	skeletal muscle actin 2	253	20	2.78766e-52	0.9585
908	c1089_g1_i1	---NA---	226	0
9836	c10890_g1_i1	---NA---	632	0
9837	c10890_g1_i2	---NA---	473	0
9838	c10891_g1_i1	---NA---	643	0
9839	c10891_g1_i2	---NA---	546	0
9840	c10892_g1_i1	---NA---	326	0
9841	c10893_g1_i1	---NA---	322	0
9842	c10893_g1_i2	mothers against decapentaplegic homolog 3-like	1120	20	2.84201e-153	0.9105
9843	c10893_g1_i3	mothers against decapentaplegic homolog 3-like	1250	20	1.37831e-152	0.9105
9844	c10896_g1_i1	---NA---	377	0
9845	c10896_g2_i1	---NA---	430	0
9846	c10898_g1_i1	---NA---	222	0
9847	c10898_g1_i2	---NA---	446	0
9848	c10899_g1_i1	hypothetical protein IscW_ISCW013877	533	1	4.59535e-06	0.64
9849	c10899_g1_i2	---NA---	665	0
103	c109_g1_i1	---NA---	265	0
909	c1090_g1_i1	---NA---	418	0
910	c1090_g1_i2	---NA---	554	0
9850	c10900_g1_i1	---NA---	245	0
9851	c10908_g1_i1	tigger transposable element-derived protein 1-like	211	6	2.19548e-13	0.7133
9852	c10908_g2_i1	---NA---	290	0
9853	c10910_g1_i1	---NA---	388	0
9854	c10912_g1_i1	---NA---	321	0
9855	c10912_g1_i2	---NA---	241	0
9856	c10912_g2_i1	---NA---	515	0
9857	c10913_g1_i1	---NA---	344	0
9858	c10914_g1_i1	---NA---	375	0
911	c1092_g1_i1	isoform b	250	20	8.94571e-25	0.836
912	c1092_g1_i2	isoform b	263	20	9.32644e-25	0.8455
9859	c10921_g1_i1	---NA---	291	0
9860	c10928_g1_i1	---NA---	403	0
913	c1093_g1_i1	hypothetical protein CAPTEDRAFT_214115	564	18	4.14711e-26	0.5678
9861	c10930_g1_i1	---NA---	288	0
9862	c10933_g1_i1	---NA---	1116	0
9863	c10934_g1_i1	---NA---	242	0
9864	c10936_g1_i1	---NA---	255	0
9865	c10938_g1_i1	---NA---	935	0
914	c1094_g1_i1	---NA---	574	0
9866	c10940_g1_i1	---NA---	290	0
9867	c10942_g1_i1	---NA---	419	0
9868	c10943_g1_i1	---NA---	201	0
9869	c10946_g1_i1	---NA---	646	0
9870	c10950_g1_i1	---NA---	285	0
9871	c10952_g1_i1	PREDICTED: uncharacterized protein LOC100905519	322	20	2.07428e-09	0.48
9872	c10954_g1_i1	---NA---	211	0
9873	c10956_g1_i1	---NA---	304	0
9874	c10956_g1_i2	---NA---	653	0
9875	c10956_g1_i3	---NA---	554	0
9876	c10958_g1_i1	---NA---	856	0
9877	c10959_g1_i1	---NA---	207	0
9878	c10959_g1_i2	---NA---	267	0
915	c1096_g1_i1	---NA---	270	0
9879	c10966_g1_i1	---NA---	245	0
9880	c10968_g1_i1	---NA---	220	0
9881	c10969_g1_i1	---NA---	240	0
916	c1097_g1_i1	---NA---	759	0
9882	c10971_g1_i1	---NA---	206	0
9883	c10973_g1_i1	---NA---	780	0
9884	c10974_g1_i1	---NA---	442	0
9885	c10975_g1_i1	---NA---	306	0
9886	c10977_g1_i1	---NA---	212	0
9887	c10978_g1_i1	---NA---	299	0
9888	c10980_g1_i1	polyprotein of retroviral	241	20	1.76719e-19	0.6535
9889	c10981_g1_i1	hypothetical protein BRAFLDRAFT_87261	486	1	1.10474e-09	0.59
9890	c10986_g1_i1	---NA---	243	0
9891	c10986_g2_i1	---NA---	233	0
917	c1099_g1_i1	---NA---	881	0
9892	c10991_g1_i1	---NA---	241	0
9893	c10992_g1_i1	---NA---	272	0
9894	c10994_g1_i1	fas-associated factor 2	2359	20	1.47113e-110	0.608
9895	c10994_g1_i2	fas-associated factor 2	2256	20	2.59899e-117	0.6115
9896	c10995_g1_i1	---NA---	374	0
9897	c10997_g1_i1	---NA---	260	0
9898	c10997_g2_i1	---NA---	712	0
9899	c10998_g1_i1	---NA---	304	0
9900	c10999_g1_i1	---NA---	2071	0
10	c11_g1_i1	---NA---	219	0
104	c110_g1_i1	---NA---	546	0
918	c1100_g1_i1	---NA---	324	0
9901	c11001_g1_i1	fit family protein cg10671-like	993	20	1.39632e-19	0.48
9902	c11001_g1_i2	---NA---	239	0
9903	c11001_g1_i3	isoform b	840	20	4.25766e-11	0.5335
9904	c11003_g1_i1	---NA---	1243	0
9905	c11003_g2_i1	---NA---	380	0
9906	c11004_g1_i1	---NA---	2225	0
9907	c11004_g1_i2	hypothetical protein	2615	1	1.01564e-11	0.77
9908	c11005_g1_i1	---NA---	367	0
9909	c11005_g2_i1	---NA---	214	0
9910	c11006_g1_i1	vesicle-associated membrane protein 4	3157	20	3.9416e-20	0.6965
9911	c11007_g1_i1	---NA---	204	0
9912	c11007_g2_i1	---NA---	334	0
9913	c11007_g3_i1	---NA---	286	0
9914	c11007_g4_i1	---NA---	2004	0
9915	c11009_g1_i1	---NA---	204	0
9916	c11009_g1_i2	---NA---	274	0
919	c1101_g1_i1	guanine nucleotide exchange factor mss4 homolog	596	20	3.49197e-31	0.6725
920	c1101_g1_i2	guanine nucleotide exchange factor mss4 homolog	637	20	5.19878e-31	0.6725
9917	c11010_g1_i1	---NA---	2132	0
9918	c11011_g1_i1	dfp3_antmy ame: full= defense protein 3 short=dfp-3 flags: precursor	796	20	1.47906e-22	0.51
9919	c11011_g1_i2	hypothetical protein DAPPUDRAFT_304086	461	2	1.82886e-07	0.55
9920	c11012_g1_i1	---NA---	376	0
9921	c11012_g1_i2	---NA---	369	0
9922	c11012_g1_i3	---NA---	343	0
9923	c11012_g1_i4	---NA---	542	0
9924	c11013_g1_i1	---NA---	485	0
9925	c11015_g1_i1	---NA---	592	0
9926	c11017_g1_i1	---NA---	581	0
9927	c11018_g1_i1	---NA---	2804	0
9928	c11018_g1_i2	---NA---	2827	0
9929	c11019_g1_i1	---NA---	449	0
9930	c11020_g1_i1	heparin-binding growth factor 1	1422	20	4.88512e-34	0.645
9931	c11020_g1_i2	heparin-binding growth factor 1	679	20	7.01291e-36	0.642
9932	c11020_g1_i3	heparin-binding growth factor 1	951	20	4.71505e-35	0.645
9933	c11020_g1_i4	heparin-binding growth factor 1	1119	20	1.11936e-34	0.646
9934	c11021_g1_i1	---NA---	1717	0
9935	c11022_g1_i1	membrane-associated protein hem-like	3208	20	0	0.8085
9936	c11023_g1_i1	---NA---	222	0
9937	c11024_g1_i1	---NA---	636	0
9938	c11024_g2_i1	---NA---	223	0
9939	c11024_g3_i1	---NA---	407	0
9940	c11025_g1_i1	nuclear protein localization protein 4 homolog	3838	20	0	0.6955
9941	c11026_g1_i1	---NA---	373	0
9942	c11028_g1_i1	fad-dependent oxidoreductase domain-containing protein 1-like	1261	20	1.0369e-159	0.6935
9943	c11028_g1_i2	fad-dependent oxidoreductase domain-containing protein 1-like	1228	20	2.21818e-154	0.6945
9944	c11029_g1_i1	---NA---	866	0
921	c1103_g1_i1	---NA---	213	0
9945	c11030_g1_i1	calcium-transporting atpase type 2c member 1-like	3209	20	0	0.734
9946	c11030_g1_i2	calcium-transporting atpase type 2c member 1-like	3042	20	0	0.735
9947	c11031_g1_i1	---NA---	584	0
9948	c11032_g1_i1	isoform e	8031	20	1.45962e-143	0.7245
9949	c11033_g1_i1	trna-specific adenosine deaminase 2	938	20	5.12172e-60	0.704
9950	c11034_g1_i1	---NA---	483	0
9951	c11034_g1_i2	---NA---	445	0
9952	c11037_g1_i1	gamma-butyrobetaine dioxygenase	1504	20	1.31843e-180	0.53
9953	c11037_g1_i2	gamma-butyrobetaine dioxygenase	1533	20	1.68823e-180	0.5295
9954	c11038_g1_i1	---NA---	1955	0
9955	c11038_g2_i1	---NA---	217	0
9956	c11038_g3_i1	gamma-secretase subunit pen-2	1124	20	1.16192e-40	0.773
9957	c11039_g1_i1	---NA---	711	0
9958	c11040_g1_i1	---NA---	1269	0
9959	c11040_g2_i1	---NA---	1186	0
9960	c11040_g2_i2	---NA---	1243	0
9961	c11040_g2_i3	---NA---	661	0
9962	c11043_g1_i1	---NA---	8066	0
9963	c11044_g1_i1	sprouty- evh1 domain-containing protein 2-like isoform 1	3648	20	3.02252e-57	0.6765
9964	c11044_g1_i2	sprouty- evh1 domain-containing protein 2-like isoform 1	3632	20	7.63705e-60	0.6865
9965	c11045_g1_i1	---NA---	365	0
9966	c11046_g1_i1	btb poz domain-containing adapter for cul3-mediated degradation protein 3-like	2741	20	6.41896e-149	0.8545
9967	c11048_g1_i1	---NA---	518	0
9968	c11048_g2_i1	---NA---	416	0
922	c1105_g1_i1	membrane-anchored androgenic gland specific factor	607	1	1.38258e-87	1
9969	c11050_g1_i1	atp-binding cassette sub-family d member 3	1328	20	2.86241e-168	0.739
9970	c11050_g1_i2	atp-binding cassette sub-family d member 3	1457	20	1.36098e-167	0.739
9971	c11052_g1_i1	PREDICTED: kanadaptin-like	1362	5	4.73563e-08	0.588
9972	c11052_g1_i2	Kanadaptin	2305	4	3.94383e-07	0.625
9973	c11053_g1_i1	PREDICTED: uncharacterized protein LOC101239929	213	6	1.15012e-15	0.5467
9974	c11054_g1_i1	mothers against decapentaplegic homolog 6	2915	20	2.00708e-78	0.579
9975	c11055_g1_i1	rna-directed dna polymerase from mobile element jockey-like	317	3	2.72565e-07	0.53
9976	c11056_g1_i1	---NA---	472	0
9977	c11057_g1_i1	pdgf- and vegf-related factor isoform a	2592	20	1.4671e-31	0.4815
9978	c11057_g1_i2	pdgf- and vegf-related factor isoform a	3004	20	5.95261e-32	0.481
9979	c11058_g1_i1	---NA---	502	0
9980	c11059_g1_i1	---NA---	212	0
9981	c11059_g2_i1	---NA---	249	0
923	c1106_g1_i1	homeobox protein nk-	1055	20	2.33761e-29	0.8945
9982	c11060_g1_i1	---NA---	2512	0
9983	c11061_g1_i1	grpe protein homolog mitochondrial	1592	20	7.48201e-83	0.6665
9984	c11062_g1_i1	28s ribosomal protein mitochondrial-like	688	20	3.45454e-36	0.6525
9985	c11062_g1_i2	28s ribosomal protein mitochondrial-like	675	20	1.48904e-24	0.823
9986	c11062_g1_i3	28s ribosomal protein mitochondrial-like	709	20	7.19417e-44	0.704
9987	c11063_g1_i1	---NA---	1185	0
9988	c11063_g1_i2	---NA---	929	0
9989	c11064_g1_i1	protein tyrosine phosphatase type iva 1-like	2931	20	1.6955e-83	0.8275
9990	c11065_g1_i1	nfx1-type zinc finger-containing protein 1-like	2211	20	1.95835e-138	0.6195
9991	c11066_g1_i1	pleckstrin homology domain-containing family f member 2-like	1408	20	1.21926e-122	0.844
9992	c11066_g1_i2	pleckstrin homology domain-containing family f member 2-like	1447	20	1.75328e-122	0.8395
9993	c11067_g1_i1	---NA---	542	0
9994	c11068_g1_i1	exportin-2 isoform x1	3438	20	0	0.699
9995	c11068_g1_i2	exportin-2 isoform x1	3349	20	0	0.6995
9996	c11068_g1_i3	exportin-2 isoform x1	3456	20	0	0.6995
9997	c11069_g1_i1	krueppel-like factor 6 isoform x1	1917	20	6.71532e-53	0.9125
924	c1107_g1_i1	---NA---	390	0
9998	c11070_g1_i1	nf-kappa-b-repressing factor	894	20	1.25678e-33	0.5765
9999	c11071_g1_i1	atp-citrate synthase	2307	20	0	0.8175
10000	c11072_g1_i1	---NA---	290	0
10001	c11073_g1_i1	---NA---	334	0
10002	c11073_g1_i2	---NA---	528	0
10003	c11076_g1_i1	---NA---	252	0
10004	c11077_g1_i1	upstream activation factor subunit spp27-like	1471	20	4.84896e-33	0.883
10005	c11077_g1_i2	upstream activation factor subunit spp27-like	1449	20	1.34517e-32	0.883
10006	c11077_g1_i3	upstream activation factor subunit spp27-like	1461	20	1.24137e-32	0.868
925	c1108_g1_i1	---NA---	210	0
10007	c11080_g1_i1	nuclear receptor 2c2-associated	628	20	6.17664e-30	0.6135
10008	c11080_g1_i2	nuclear receptor 2c2-associated	649	20	2.60979e-27	0.5865
10009	c11081_g1_i1	---NA---	253	0
10010	c11082_g1_i1	---NA---	1115	0
10011	c11084_g1_i1	---NA---	221	0
10012	c11086_g1_i1	---NA---	1040	0
10013	c11087_g1_i1	---NA---	242	0
10014	c11088_g1_i1	---NA---	1148	0
10015	c11089_g1_i1	---NA---	401	0
10016	c11090_g1_i1	---NA---	203	0
10017	c11091_g1_i1	multiple epidermal growth factor-like domains protein 11-like	4571	20	0	0.595
10018	c11092_g1_i1	---NA---	390	0
10019	c11093_g1_i1	---NA---	379	0
10020	c11094_g1_i1	---NA---	362	0
10021	c11096_g1_i1	---NA---	450	0
10022	c11098_g1_i1	---NA---	993	0
10023	c11099_g1_i1	rna-directed dna polymerase from mobile element jockey-like	801	20	2.82661e-26	0.481
926	c1110_g1_i1	---NA---	210	0
10024	c11100_g1_i1	poly rna mitochondrial-like	1016	20	7.30257e-68	0.68
10025	c11100_g1_i2	poly rna mitochondrial-like	601	20	3.90501e-19	0.618
10026	c11101_g1_i1	---NA---	213	0
10027	c11104_g1_i1	ubiquitin-conjugating enzyme e2 q2-like	1799	20	0	0.7875
10028	c11106_g1_i1	---NA---	545	0
10029	c11109_g1_i1	ubiquitin-associated domain-containing protein 2	1211	20	2.18612e-70	0.5655
10030	c11109_g2_i1	---NA---	290	0
10031	c11110_g1_i1	---NA---	1305	0
10032	c11111_g1_i1	---NA---	779	0
10033	c11111_g1_i2	---NA---	1521	0
10034	c11112_g1_i1	polyadenylate-binding protein 1-like isoform 1	2905	20	0	0.8
10035	c11112_g1_i2	polyadenylate-binding protein 1-like isoform 1	2834	20	0	0.8
10036	c11113_g1_i1	---NA---	278	0
10037	c11114_g1_i1	---NA---	316	0
10038	c11114_g2_i1	---NA---	239	0
10039	c11115_g1_i1	---NA---	664	0
10040	c11118_g1_i1	---NA---	262	0
10041	c11119_g1_i1	---NA---	896	0
10042	c11119_g2_i1	---NA---	669	0
10043	c11120_g1_i1	coiled-coil domain-containing protein 124	1659	20	1.524e-37	0.681
10044	c11122_g1_i1	myosin heavy chain type 1	770	20	1.88903e-90	0.801
10045	c11124_g1_i1	---NA---	1617	0
10046	c11124_g1_i2	---NA---	1248	0
10047	c11125_g1_i1	---NA---	280	0
10048	c11125_g2_i1	---NA---	770	0
10049	c11126_g1_i1	---NA---	208	0
10050	c11127_g1_i1	---NA---	209	0
10051	c11128_g1_i1	glutaryl- mitochondrial-like	1669	20	0	0.8275
10052	c11129_g1_i1	isoform a	4847	20	4.07256e-126	0.7795
10053	c11129_g1_i2	isoform d	5108	20	1.84403e-126	0.7685
10054	c11129_g1_i3	isoform d	5051	20	1.68087e-126	0.7685
10055	c11130_g1_i1	---NA---	445	0
10056	c11131_g1_i1	---NA---	465	0
10057	c11132_g1_i1	---NA---	517	0
10058	c11133_g1_i1	---NA---	225	0
10059	c11134_g1_i1	---NA---	1149	0
10060	c11134_g1_i2	---NA---	676	0
10061	c11135_g1_i1	a disintegrin and metalloproteinase with thrombospondin motifs 3-like	2048	20	1.49004e-21	0.6145
10062	c11135_g1_i2	a disintegrin and metalloproteinase with thrombospondin motifs 3-like	1930	20	7.58419e-17	0.5065
10063	c11135_g1_i3	a disintegrin and metalloproteinase with thrombospondin motifs 3-like	1934	20	7.61415e-17	0.5065
10064	c11136_g1_i1	---NA---	282	0
10065	c11136_g2_i1	---NA---	925	0
10066	c11137_g1_i1	---NA---	202	0
10067	c11138_g1_i1	facilitated trehalose transporter tret1-like	2144	20	1.73534e-68	0.5225
10068	c11139_g1_i1	myosin heavy chain	744	20	1.68429e-117	0.8985
10069	c11139_g2_i1	myosin heavy chain	536	20	4.52427e-85	0.8885
10070	c11141_g1_i1	---NA---	955	0
10071	c11141_g1_i2	---NA---	932	0
10072	c11141_g1_i3	---NA---	977	0
10073	c11142_g1_i1	---NA---	534	0
10074	c11143_g1_i1	prolyl 3-hydroxylase 2-like	1638	20	1.62058e-71	0.578
10075	c11144_g1_i1	---NA---	760	0
10076	c11144_g1_i2	---NA---	783	0
10077	c11145_g1_i1	down syndrome cell adhesion molecule	2313	20	0	0.6635
10078	c11145_g1_i2	down syndrome cell adhesion molecule-like protein dscam2-like	2373	20	0	0.6885
10079	c11145_g1_i3	down syndrome cell adhesion molecule-like protein cg42256-like	2121	20	7.81518e-163	0.648
10080	c11146_g1_i1	isoform c	1866	20	6.27174e-140	0.66
10081	c11146_g1_i2	isoform c	2130	20	9.98144e-129	0.704
10082	c11147_g1_i1	---NA---	1842	0
10083	c11148_g1_i1	---NA---	1686	0
10084	c11149_g1_i1	polyhomeotic-like protein 3 isoform x2	1094	20	5.28534e-41	0.4895
927	c1115_g1_i1	---NA---	441	0
10085	c11150_g1_i1	glutamate synthase	2193	16	3.0916e-83	0.5875
10086	c11152_g1_i1	---NA---	860	0
10087	c11152_g2_i1	zinc finger protein 850-like	2804	20	6.84467e-10	0.4155
10088	c11152_g2_i2	zinc finger protein 850-like	2143	20	4.44298e-10	0.4155
10089	c11154_g1_i1	protein yippee-like 2	1979	20	2.53601e-73	0.961
10090	c11155_g1_i1	protein tssc1	781	16	8.06059e-12	0.565
10091	c11155_g1_i2	protein tssc1	765	16	7.51111e-12	0.565
10092	c11156_g1_i1	---NA---	1052	0
10093	c11157_g1_i1	constitutive coactivator of ppar-gamma-like protein 1 homolog	997	20	1.65974e-78	0.7435
10094	c11157_g1_i2	constitutive coactivator of ppar-gamma-like protein 1 homolog	2177	20	1.68332e-163	0.6855
10095	c11158_g1_i1	---NA---	276	0
10096	c11159_g1_i1	---NA---	367	0
10097	c11159_g1_i2	---NA---	274	0
10098	c11160_g1_i1	---NA---	325	0
10099	c11160_g1_i2	---NA---	273	0
10100	c11161_g1_i1	---NA---	422	0
10101	c11161_g1_i2	---NA---	617	0
10102	c11161_g1_i3	---NA---	429	0
10103	c11161_g1_i4	---NA---	542	0
10104	c11162_g1_i1	---NA---	601	0
10105	c11163_g1_i1	zinc finger protein 135-like	1566	20	2.00261e-13	0.7505
10106	c11163_g1_i2	zinc finger protein 300	1657	20	2.93126e-26	0.774
10107	c11164_g1_i1	phosphatase 1 binding protein	3077	20	9.00775e-65	0.615
10108	c11165_g1_i1	forkhead box l2	3535	20	8.76608e-34	0.728
10109	c11165_g1_i2	forkhead box l2	3395	20	7.9764e-34	0.728
10110	c11166_g1_i1	dynamin-like isoform 2	1709	20	0	0.8905
10111	c11166_g1_i2	dynamin-like isoform 2	1642	20	0	0.8905
10112	c11166_g1_i3	dynamin-like isoform 2	1672	20	0	0.8835
10113	c11167_g1_i1	---NA---	1075	0
10114	c11168_g1_i1	---NA---	507	0
10115	c11168_g2_i1	---NA---	2215	0
10116	c11169_g1_i1	---NA---	344	0
928	c1117_g1_i1	---NA---	768	0
10117	c11171_g1_i1	---NA---	3391	0
10118	c11172_g1_i1	---NA---	367	0
10119	c11172_g2_i1	---NA---	282	0
10120	c11174_g1_i1	isochorismatase domain-containing protein mitochondrial-like	774	20	5.11738e-83	0.7585
10121	c11176_g1_i1	ubiquitin-conjugating enzyme e2 j1-like	2677	20	3.63119e-85	0.7575
10122	c11177_g1_i1	---NA---	466	0
10123	c11177_g2_i1	---NA---	270	0
10124	c11178_g1_i1	upf0729 protein gd16342-like	392	8	7.95509e-12	0.5175
10125	c11178_g2_i1	transaldolase	1779	20	3.18702e-165	0.817
10126	c11179_g1_i1	---NA---	478	0
10127	c11180_g1_i1	mitogen-activated protein kinase kinase kinase 13-like	1529	20	0	0.776
10128	c11180_g1_i2	mitogen-activated protein kinase kinase kinase 13-like	1517	20	0	0.7955
10129	c11181_g1_i1	conserved oligomeric golgi complex subunit 2	2425	20	3.47152e-148	0.553
10130	c11181_g1_i2	conserved oligomeric golgi complex subunit 2-like	742	20	5.76394e-22	0.7745
10131	c11183_g1_i1	---NA---	326	0
10132	c11185_g1_i1	---NA---	295	0
10133	c11186_g1_i1	e3 ubiquitin-protein ligase ubr4	11701	20	0	0.707
10134	c11186_g1_i2	e3 ubiquitin-protein ligase ubr4	11683	20	0	0.7075
10135	c11187_g1_i1	---NA---	263	0
10136	c11187_g1_i2	---NA---	309	0
10137	c11188_g1_i1	gamma-aminobutyric acid receptor subunit theta	3416	20	5.46559e-19	0.422
10138	c11189_g1_i1	casein kinase i isoform delta-like	2389	20	0	0.8325
10139	c11189_g1_i2	casein kinase i isoform epsilon	1741	20	0	0.9525
929	c1119_g1_i1	---NA---	291	0
10140	c11190_g1_i1	fggy carbohydrate kinase domain-containing	604	20	2.03278e-48	0.7115
10141	c11190_g1_i2	fggy carbohydrate kinase domain-containing	752	20	1.35783e-48	0.7135
10142	c11191_g1_i1	---NA---	1438	0
10143	c11192_g1_i1	---NA---	424	0
10144	c11192_g1_i2	---NA---	903	0
10145	c11194_g1_i1	---NA---	217	0
10146	c11195_g1_i1	kynurenine--oxoglutarate transaminase 3-like	2159	20	0	0.7605
10147	c11195_g1_i2	kynurenine--oxoglutarate transaminase 3-like	2210	20	0	0.7605
10148	c11199_g1_i1	---NA---	326	0
10149	c11199_g2_i1	hemk methyltransferase family member 2-like isoform x1	2437	20	1.34381e-69	0.6805
105	c112_g1_i1	---NA---	226	0
10150	c11200_g1_i1	---NA---	887	0
10151	c11200_g2_i1	---NA---	245	0
10152	c11202_g1_i1	---NA---	274	0
10153	c11202_g2_i1	---NA---	452	0
10154	c11203_g1_i1	nhl repeat-containing	3432	20	8.96153e-172	0.8665
10155	c11203_g1_i2	nhl repeat-containing	3586	20	3.33181e-171	0.866
10156	c11204_g1_i1	isoform a	2621	20	6.27562e-18	0.789
10157	c11205_g1_i1	---NA---	257	0
10158	c11207_g1_i1	---NA---	511	0
10159	c11209_g1_i1	fimbrin plastin	4288	20	0	0.866
10160	c11209_g2_i1	---NA---	370	0
10161	c11210_g1_i1	tigger transposable element-derived protein 1-like	309	20	1.98925e-24	0.773
10162	c11210_g1_i2	tigger transposable element-derived protein 1-like	473	20	1.44053e-35	0.7695
10163	c11211_g1_i1	---NA---	405	0
10164	c11212_g1_i1	tay isoform a	1556	20	3.04944e-14	0.5935
10165	c11212_g1_i2	tay isoform a	1526	20	9.07226e-17	0.664
10166	c11213_g1_i1	---NA---	1465	0
10167	c11213_g2_i1	---NA---	218	0
10168	c11214_g1_i1	---NA---	793	0
10169	c11216_g1_i1	grip and coiled-coil domain-containing protein 2	6198	20	3.23149e-62	0.5205
10170	c11216_g1_i2	grip and coiled-coil domain-containing protein 2	6096	20	4.34222e-56	0.518
10171	c11217_g1_i1	---NA---	3470	0
930	c1122_g1_i1	---NA---	225	0
10172	c11221_g1_i1	exonuclease 3 -5 domain-containing protein 1	2706	20	8.0739e-35	0.5055
10173	c11221_g1_i2	exonuclease 3 -5 domain-containing protein 1	2592	20	3.66687e-32	0.498
10174	c11222_g1_i1	hemolymph proteinase 8	1842	20	1.40895e-118	0.5205
10175	c11223_g1_i1	---NA---	1214	0
10176	c11223_g2_i1	---NA---	841	0
10177	c11224_g1_i1	cdk2-associated and cullin domain-containing protein 1	624	20	1.0291e-22	0.6105
10178	c11224_g1_i2	cdk2-associated and cullin domain-containing protein 1	609	20	9.09367e-23	0.6105
10179	c11224_g1_i3	cdk2-associated and cullin domain-containing protein 1	590	20	7.80999e-23	0.6075
10180	c11225_g1_i1	---NA---	709	0
10181	c11226_g1_i1	matrix metalloproteinase-14-like isoform x1	2025	20	0	0.708
10182	c11227_g1_i1	myosin va	2137	20	0	0.675
10183	c11227_g1_i2	myosin va	1952	20	0	0.719
10184	c11228_g1_i1	---NA---	906	0
931	c1123_g1_i1	---NA---	552	0
10185	c11230_g1_i1	---NA---	467	0
10186	c11231_g1_i1	rna-directed dna polymerase from mobile element jockey-like	299	20	7.71559e-18	0.659
10187	c11232_g1_i1	---NA---	1714	0
10188	c11233_g1_i1	glutathione s-transferase	1147	20	3.23018e-70	0.6345
10189	c11233_g1_i2	glutathione s-transferase	1165	20	3.85023e-70	0.6345
10190	c11234_g1_i1	mediator of rna polymerase ii transcription subunit 30-like	844	20	1.09635e-45	0.6885
10191	c11234_g1_i2	mediator of rna polymerase ii transcription subunit 30-like	836	20	1.14113e-45	0.6885
10192	c11235_g1_i1	---NA---	1284	0
10193	c11237_g1_i1	---NA---	1970	0
10194	c11239_g1_i1	serine arginine-rich splicing factor 2-like	2323	20	2.41222e-47	0.9105
10195	c11241_g1_i1	lanc-like protein 3 homolog	2411	20	1.59867e-110	0.693
10196	c11243_g1_i1	cation-independent mannose-6-phosphate receptor	4619	20	0	0.489
10197	c11244_g1_i1	mitogen-activated protein kinase kinase kinase 1	5072	20	1.99201e-111	0.791
10198	c11245_g1_i1	glutamine--fructose-6-phosphate aminotransferase	3467	20	0	0.8555
10199	c11245_g1_i2	glutamine--fructose-6-phosphate aminotransferase	3440	20	0	0.859
10200	c11245_g1_i3	glutamine--fructose-6-phosphate aminotransferase	3479	20	0	0.8535
10201	c11246_g1_i1	heterogeneous nuclear ribonucleoprotein f	1285	20	1.30096e-142	0.651
10202	c11246_g1_i2	heterogeneous nuclear ribonucleoprotein f	1439	20	1.01682e-131	0.647
10203	c11246_g1_i3	heterogeneous nuclear ribonucleoprotein f	1300	20	1.0738e-132	0.647
10204	c11247_g1_i1	---NA---	1149	0
10205	c11249_g1_i1	---NA---	2875	0
10206	c11249_g1_i2	---NA---	2530	0
10207	c11250_g1_i1	---NA---	294	0
10208	c11250_g2_i1	---NA---	757	0
10209	c11254_g1_i1	---NA---	312	0
10210	c11254_g2_i1	---NA---	473	0
10211	c11258_g1_i1	---NA---	620	0
10212	c11258_g2_i1	---NA---	244	0
10213	c11258_g2_i2	---NA---	564	0
10214	c11259_g1_i1	---NA---	4487	0
10215	c11259_g1_i2	---NA---	2196	0
10216	c11261_g1_i1	chloride channel clic-like protein 1	2031	20	4.30845e-16	0.46
10217	c11261_g1_i2	chloride channel clic-like protein 1-like	1876	20	2.90196e-12	0.514
10218	c11264_g1_i1	---NA---	540	0
10219	c11265_g1_i1	---NA---	463	0
10220	c11267_g1_i1	---NA---	945	0
932	c1127_g1_i1	---NA---	210	0
10221	c11273_g1_i1	---NA---	220	0
10222	c11279_g1_i1	nup98	527	20	1.84576e-46	0.6935
10223	c11279_g1_i2	nuclear pore complex protein nup98-nup96	623	20	8.76346e-52	0.7225
933	c1128_g1_i1	calumenin precursor	2121	20	9.88689e-140	0.769
934	c1128_g1_i2	calumenin precursor	2127	20	1.04847e-139	0.769
10224	c11282_g1_i1	---NA---	247	0
10225	c11282_g2_i1	---NA---	555	0
10226	c11285_g1_i1	thap domain-containing protein 5	256	20	2.79176e-15	0.666
10227	c11285_g1_i2	thap domain-containing protein 4	481	20	2.16354e-14	0.598
10228	c11285_g1_i3	thap domain-containing protein 4	574	20	2.04153e-14	0.69
10229	c11289_g1_i1	---NA---	376	0
935	c1129_g1_i1	---NA---	210	0
10230	c11291_g1_i1	---NA---	251	0
10231	c11292_g1_i1	hypothetical protein BRAFLDRAFT_123593	790	1	6.36399e-06	0.68
10232	c11294_g1_i1	---NA---	548	0
10233	c11298_g1_i1	---NA---	703	0
10234	c11298_g1_i2	---NA---	561	0
10235	c11298_g1_i3	---NA---	251	0
10236	c11299_g1_i1	---NA---	205	0
106	c113_g1_i1	---NA---	335	0
936	c1130_g1_i1	---NA---	412	0
10237	c11300_g1_i1	---NA---	759	0
10238	c11302_g1_i1	---NA---	509	0
10239	c11303_g1_i1	---NA---	242	0
10240	c11303_g2_i1	circumsporozoite protein	482	3	1.13661e-13	0.4867
937	c1131_g1_i1	probable acyl- dehydrogenase 6-like	1123	20	3.31533e-155	0.836
938	c1131_g1_i2	probable acyl- dehydrogenase 6-like	1374	20	0	0.824
10241	c11315_g1_i1	---NA---	369	0
10242	c11316_g1_i1	centlein- partial	824	3	7.61944e-09	0.5067
939	c1132_g1_i1	---NA---	252	0
10243	c11320_g1_i1	---NA---	421	0
10244	c11321_g1_i1	---NA---	304	0
10245	c11323_g1_i1	nucleolar protein c7b	435	12	5.30224e-09	0.5292
10246	c11323_g1_i2	nucleolar protein	419	4	2.53136e-07	0.5575
10247	c11324_g1_i1	zinc finger protein 616-like isoform x2	568	3	4.51486e-07	0.5767
10248	c11325_g1_i1	trifunctional enzyme subunit mitochondrial-like	2569	20	0	0.8195
10249	c11326_g1_i1	protease m1 zinc metalloprotease	619	17	2.59225e-12	0.6853
10250	c11326_g2_i1	protease m1 zinc metalloprotease	533	14	1.38494e-08	0.7221
10251	c11328_g1_i1	---NA---	223	0
10252	c11329_g1_i1	---NA---	256	0
10253	c11330_g1_i1	---NA---	2744	0
10254	c11332_g1_i1	---NA---	379	0
10255	c11333_g1_i1	---NA---	385	0
10256	c11336_g1_i1	bcl2 adenovirus e1b 19 kda protein-interacting protein 3-like	3439	20	2.08939e-51	0.721
10257	c11336_g1_i2	bcl2 adenovirus e1b 19 kda protein-interacting protein 3-like	1588	20	8.82984e-53	0.719
10258	c11337_g1_i1	---NA---	211	0
10259	c11339_g1_i1	gamma-interferon-inducible lysosomal thiol reductase	941	20	2.13113e-55	0.5775
10260	c11340_g1_i1	ficolin (collagen fibrinogen domain containing) 1	989	20	7.10529e-43	0.5155
10261	c11340_g1_i2	ficolin (collagen fibrinogen domain containing) 1	1228	20	4.38968e-42	0.5155
10262	c11341_g1_i1	---NA---	373	0
10263	c11343_g1_i1	---NA---	424	0
10264	c11343_g2_i1	---NA---	631	0
10265	c11344_g1_i1	---NA---	541	0
10266	c11344_g1_i2	---NA---	444	0
10267	c11344_g2_i1	---NA---	1122	0
10268	c11345_g1_i1	exportin-7 isoform x1	3627	20	0	0.8255
10269	c11345_g1_i2	exportin-7 isoform x1	3576	20	0	0.837
10270	c11345_g1_i3	exportin-7 isoform x1	3615	20	0	0.828
10271	c11347_g1_i1	trafficking protein particle complex subunit 4-like	1059	20	1.10903e-109	0.82
10272	c11347_g1_i2	trafficking protein particle complex subunit 4-like	1037	20	1.11402e-109	0.82
10273	c11348_g1_i1	serine threonine-protein kinase tricorner-like isoform 2	2356	20	0	0.9125
10274	c11348_g1_i2	serine threonine-protein kinase tricorner-like isoform 2	3026	20	0	0.914
940	c1135_g1_i1	---NA---	460	0
10275	c11351_g1_i1	---NA---	220	0
10276	c11351_g2_i1	mitochondrial ribosomal protein l50	741	20	9.9941e-48	0.656
10277	c11352_g1_i1	protein lin-7 homolog b-like	2343	20	2.07406e-98	0.934
10278	c11352_g1_i2	protein lin-7 homolog b-like	2239	20	3.52029e-98	0.9335
10279	c11353_g1_i1	---NA---	1092	0
10280	c11354_g1_i1	---NA---	588	0
10281	c11354_g1_i2	xk-related protein 5-like	780	20	4.19966e-18	0.546
10282	c11355_g1_i1	reverse transcriptase	3148	1	5.17135e-07	0.49
10283	c11357_g1_i1	apoptosis stimulating of	2669	20	2.28589e-61	0.674
10284	c11357_g1_i2	apoptosis stimulating of	2684	20	2.34209e-59	0.6555
10285	c11357_g1_i3	apoptosis stimulating of	2618	20	2.10499e-61	0.674
10286	c11358_g1_i1	PREDICTED: uncharacterized protein LOC100197678, partial	214	1	3.08412e-09	0.6
10287	c11358_g1_i2	---NA---	218	0
941	c1136_g1_i1	---NA---	377	0
10288	c11360_g1_i1	stam-binding a-like	1581	20	2.15715e-122	0.748
10289	c11360_g1_i2	stam-binding a-like	1593	20	2.88003e-122	0.748
10290	c11361_g1_i1	---NA---	1010	0
10291	c11362_g1_i1	---NA---	418	0
10292	c11363_g1_i1	---NA---	398	0
10293	c11363_g2_i1	---NA---	647	0
10294	c11364_g1_i1	---NA---	628	0
10295	c11365_g1_i1	---NA---	384	0
10296	c11366_g1_i1	motile sperm domain-containing protein 1-like	1780	20	1.53689e-37	0.5665
10297	c11366_g1_i2	motile sperm domain-containing protein 1-like	1795	20	1.58118e-37	0.5665
10298	c11368_g1_i1	---NA---	1090	0
10299	c11369_g1_i1	---NA---	524	0
942	c1137_g1_i1	---NA---	2660	0
10300	c11370_g1_i1	---NA---	526	0
10301	c11371_g1_i1	---NA---	1135	0
10302	c11372_g1_i1	---NA---	267	0
10303	c11372_g1_i2	---NA---	207	0
10304	c11374_g1_i1	methylosome subunit picln	986	20	1.28759e-37	0.661
10305	c11374_g1_i2	---NA---	943	0
10306	c11375_g1_i1	zinc finger protein 324b	332	20	1.28653e-21	0.674
10307	c11375_g2_i1	isoform i	1965	20	1.17351e-49	0.722
10308	c11376_g1_i1	---NA---	285	0
10309	c11377_g1_i1	---NA---	338	0
10310	c11380_g1_i1	hypothetical protein EAI_07362	1374	6	8.35536e-20	0.5083
10311	c11380_g1_i2	hypothetical protein EAI_07362	1463	6	2.10447e-20	0.5117
10312	c11382_g1_i1	---NA---	423	0
10313	c11382_g1_i2	---NA---	480	0
10314	c11385_g1_i1	calcium uptake protein 1 mitochondrial-like	2032	20	0	0.7775
10315	c11385_g1_i2	isoform b	759	20	1.91233e-26	0.7285
10316	c11388_g1_i1	---NA---	817	0
943	c1139_g1_i1	---NA---	303	0
10317	c11390_g1_i1	reverse partial	230	20	9.07928e-12	0.6965
10318	c11394_g1_i1	---NA---	460	0
10319	c11395_g1_i1	e3 ubiquitin-protein ligase chip-like	1815	20	7.145e-134	0.8245
10320	c11396_g1_i1	---NA---	202	0
10321	c11397_g1_i1	---NA---	349	0
10322	c11398_g1_i1	---NA---	252	0
10323	c11398_g2_i1	---NA---	481	0
107	c114_g1_i1	---NA---	228	0
944	c1140_g1_i1	---NA---	385	0
945	c1140_g2_i1	---NA---	487	0
10324	c11400_g1_i1	multiple inositol polyphosphate phosphatase 1-like	1911	20	2.98194e-90	0.5185
10325	c11402_g1_i1	---NA---	457	0
10326	c11403_g1_i1	c-type lectin domain family 4 member m-like	1620	20	2.14388e-16	0.479
10327	c11403_g1_i2	c-type lectin domain family 4 member m-like	1646	20	2.24662e-16	0.479
10328	c11404_g1_i1	---NA---	376	0
10329	c11405_g1_i1	---NA---	203	0
10330	c11407_g1_i1	---NA---	223	0
10331	c11408_g1_i1	tigger transposable element-derived protein 1-like	716	19	1.664e-25	0.6921
946	c1141_g1_i1	neurexin isoform f	606	20	2.22907e-06	0.7315
10332	c11411_g1_i1	zinc finger protein 160-like	301	4	2.85068e-07	0.625
10333	c11412_g1_i1	---NA---	438	0
10334	c11413_g1_i1	---NA---	1148	0
10335	c11415_g1_i1	cytosolic fe-s cluster assembly factor nubp1-like isoform x1	1016	20	1.94554e-122	0.7195
10336	c11415_g1_i2	cytosolic fe-s cluster assembly factor nubp1-like isoform x1	1127	20	4.58986e-153	0.8215
10337	c11418_g1_i1	---NA---	1023	0
10338	c11419_g1_i1	---NA---	396	0
947	c1142_g1_i1	---NA---	584	0
10339	c11421_g1_i1	---NA---	355	0
10340	c11424_g1_i1	---NA---	332	0
10341	c11428_g1_i1	---NA---	372	0
10342	c11429_g1_i1	---NA---	201	0
948	c1143_g1_i1	---NA---	214	0
10343	c11432_g1_i1	---NA---	202	0
10344	c11433_g1_i1	---NA---	948	0
10345	c11436_g1_i1	---NA---	415	0
10346	c11436_g1_i2	---NA---	618	0
10347	c11439_g1_i1	nadh dehydrogenase subunit 4	271	20	1.24247e-13	0.848
949	c1144_g1_i1	---NA---	393	0
10348	c11440_g1_i1	e3 ubiquitin-protein ligase march6	1440	20	1.65813e-60	0.7035
10349	c11445_g1_i1	---NA---	283	0
10350	c11447_g1_i1	---NA---	359	0
10351	c11448_g1_i1	GJ14799	2108	20	1.179e-109	0.579
10352	c11449_g1_i1	rna-directed dna polymerase from mobile element jockey-like	206	20	1.28682e-12	0.6515
10353	c11449_g2_i1	---NA---	336	0
950	c1145_g1_i1	---NA---	205	0
10354	c11451_g1_i1	e3 ubiquitin-protein ligase siah1	389	20	5.71921e-50	0.921
10355	c11451_g1_i2	e3 ubiquitin-protein ligase siah1	393	20	3.72572e-50	0.921
10356	c11451_g1_i3	e3 ubiquitin-protein ligase siah1 isoform x2	361	20	3.23416e-27	0.925
10357	c11457_g1_i1	nucleolar pre-ribosomal-associated protein 1-like	741	20	1.53399e-11	0.4945
10358	c11459_g1_i1	lysosome-associated membrane glycoprotein 1	2062	20	4.64252e-16	0.467
10359	c11459_g1_i2	lysosome-associated membrane glycoprotein 1	2018	20	4.48632e-16	0.467
951	c1146_g1_i1	---NA---	479	0
10360	c11464_g1_i1	---NA---	262	0
10361	c11464_g2_i1	---NA---	210	0
10362	c11466_g1_i1	---NA---	214	0
10363	c11467_g1_i1	---NA---	343	0
10364	c11467_g1_i2	---NA---	616	0
10365	c11467_g1_i3	---NA---	1430	0
10366	c11468_g1_i1	---NA---	2448	0
10367	c11468_g1_i2	---NA---	2468	0
952	c1147_g1_i1	broad-complex core protein isoforms 1 2 3 4 5-like	305	20	1.59131e-07	0.5635
10368	c11472_g1_i1	mog interacting and ectopic p-granules protein 1	3853	20	2.03926e-167	0.613
10369	c11473_g1_i1	sugar transporter	2058	20	3.47792e-121	0.6145
10370	c11477_g1_i1	trafficking kinesin-binding protein milt-like	7284	20	2.27688e-174	0.542
10371	c11477_g1_i2	trafficking kinesin-binding protein milt-like	7266	20	8.33016e-176	0.5455
10372	c11477_g1_i3	trafficking kinesin-binding protein milt-like	7305	20	8.87474e-176	0.5455
10373	c11477_g1_i4	trafficking kinesin-binding protein milt-like	7348	20	9.5076e-176	0.5455
10374	c11477_g1_i5	trafficking kinesin-binding protein milt-like	7288	20	8.66468e-176	0.5455
10375	c11479_g1_i1	---NA---	1095	0
10376	c11479_g2_i1	---NA---	262	0
10377	c11479_g3_i1	---NA---	331	0
953	c1148_g1_i1	---NA---	588	0
10378	c11480_g1_i1	hematopoietic prostaglandin d synthase	1129	20	7.60022e-41	0.5245
10379	c11480_g1_i2	hematopoietic prostaglandin d synthase	1116	20	6.83925e-41	0.5245
10380	c11483_g1_i1	---NA---	388	0
10381	c11484_g1_i1	---NA---	324	0
10382	c11486_g1_i1	---NA---	242	0
10383	c11489_g1_i1	---NA---	479	0
954	c1149_g1_i1	nadh dehydrogenase	562	20	3.73467e-15	0.751
955	c1149_g1_i2	nadh dehydrogenase	335	20	3.79229e-16	0.751
10384	c11492_g1_i1	---NA---	1226	0
10385	c11492_g1_i2	hypothetical protein IscW_ISCW013155	2353	1	3.42326e-07	0.62
10386	c11492_g1_i3	---NA---	2808	0
10387	c11492_g1_i4	hypothetical protein IscW_ISCW013155	2084	1	2.85752e-07	0.62
10388	c11494_g1_i1	---NA---	1141	0
10389	c11496_g1_i1	---NA---	927	0
10390	c11498_g1_i1	---NA---	734	0
10391	c11499_g1_i1	---NA---	466	0
956	c1150_g1_i1	---NA---	213	0
10392	c11501_g1_i1	---NA---	895	0
10393	c11503_g1_i1	---NA---	519	0
10394	c11505_g1_i1	---NA---	997	0
10395	c11509_g1_i1	translation initiation factor-3	428	20	2.37836e-21	0.636
10396	c11509_g1_i2	translation initiation factor-3	758	20	7.75287e-22	0.6125
957	c1151_g1_i1	---NA---	661	0
10397	c11510_g1_i1	---NA---	352	0
10398	c11512_g1_i1	---NA---	237	0
10399	c11513_g1_i1	---NA---	645	0
10400	c11514_g1_i1	---NA---	479	0
10401	c11514_g1_i2	---NA---	662	0
10402	c11515_g1_i1	signal peptidase complex subunit 1	1029	20	7.93309e-23	0.699
10403	c11516_g1_i1	---NA---	408	0
10404	c11516_g1_i2	---NA---	673	0
10405	c11516_g1_i3	---NA---	288	0
958	c1152_g1_i1	---NA---	394	0
10406	c11522_g1_i1	---NA---	232	0
10407	c11522_g2_i1	---NA---	245	0
959	c1153_g1_i1	septin isoform a	1508	20	0	0.863
10408	c11530_g1_i1	---NA---	204	0
10409	c11534_g1_i1	---NA---	893	0
10410	c11535_g1_i1	---NA---	243	0
10411	c11535_g1_i2	---NA---	202	0
10412	c11538_g1_i1	---NA---	283	0
10413	c11538_g1_i2	---NA---	216	0
960	c1154_g1_i1	---NA---	387	0
10414	c11540_g1_i1	glutamate dehydrogenase	2154	20	0	0.8825
10415	c11540_g1_i2	glutamate dehydrogenase	2163	20	0	0.9085
10416	c11541_g1_i1	cg12950 cg12950-pa	1375	20	1.67668e-130	0.6125
10417	c11541_g2_i1	neuronal growth regulator 1	1024	20	2.27998e-67	0.661
10418	c11543_g1_i1	---NA---	366	0
10419	c11544_g1_i1	---NA---	221	0
10420	c11545_g1_i1	---NA---	298	0
10421	c11545_g2_i1	reverse transcriptase	1616	1	1.81165e-10	0.5
10422	c11547_g1_i1	---NA---	1246	0
10423	c11547_g1_i2	---NA---	643	0
961	c1155_g1_i1	secreted frizzled-related protein 3	770	20	1.69822e-12	0.63
962	c1155_g1_i2	---NA---	275	0
10424	c11551_g1_i1	---NA---	235	0
10425	c11553_g1_i1	malignant t-cell-amplified sequence 1-like	681	20	6.97982e-86	0.783
10426	c11553_g1_i2	translation machinery-associated protein 20	735	20	9.86505e-103	0.8705
10427	c11555_g1_i1	---NA---	308	0
10428	c11555_g1_i2	---NA---	264	0
10429	c11558_g1_i1	---NA---	862	0
10430	c11562_g1_i1	---NA---	247	0
10431	c11564_g1_i1	zinc finger protein	606	20	4.70085e-81	0.847
10432	c11564_g1_i2	zinc finger protein	776	20	2.9588e-81	0.8635
10433	c11565_g1_i1	---NA---	750	0
10434	c11565_g2_i1	---NA---	578	0
10435	c11565_g3_i1	---NA---	1105	0
10436	c11565_g3_i2	---NA---	763	0
10437	c11565_g3_i3	---NA---	1704	0
10438	c11566_g1_i1	conserved hypothetical protein	1295	5	2.65282e-08	0.564
10439	c11566_g1_i2	conserved hypothetical protein	1244	5	3.37499e-08	0.564
10440	c11567_g1_i1	succinate dehydrogenase	1159	20	1.64285e-34	0.583
10441	c11567_g1_i2	succinate dehydrogenase	1198	20	1.01905e-34	0.5815
10442	c11569_g1_i1	---NA---	362	0
10443	c11569_g1_i2	---NA---	361	0
963	c1157_g1_i1	---NA---	1162	0
10444	c11570_g1_i1	ribonucleoside-diphosphate reductase subunit m2	1230	20	0	0.833
10445	c11576_g1_i1	---NA---	407	0
10446	c11578_g1_i1	zinc metalloproteinase nas-4-like	1072	20	6.88687e-24	0.519
964	c1158_g1_i1	---NA---	511	0
10447	c11580_g1_i1	---NA---	602	0
10448	c11583_g1_i1	---NA---	1076	0
10450	c11583_g1_i2	---NA---	352	0
10449	c11583_g2_i1	---NA---	680	0
10451	c11586_g1_i1	calnexin	1819	20	4.45671e-89	0.722
10452	c11587_g1_i1	---NA---	709	0
10453	c11589_g1_i1	plasminogen receptor -like	944	20	2.60882e-45	0.7265
10454	c11589_g1_i2	plasminogen receptor -like	756	20	4.3896e-46	0.7275
965	c1159_g1_i1	septin-9 isoform x3	1197	20	8.38532e-88	0.7465
10455	c11590_g1_i1	---NA---	488	0
10456	c11593_g1_i1	---NA---	1091	0
10457	c11594_g1_i1	---NA---	1519	0
10458	c11595_g1_i1	---NA---	434	0
10459	c11596_g1_i1	serine threonine-protein phosphatase 2a 65 kda regulatory subunit a alpha isoform-like	3022	20	0	0.8605
10460	c11596_g1_i2	serine threonine-protein phosphatase 2a 65 kda regulatory subunit a alpha isoform-like	2974	20	0	0.8865
10461	c11599_g1_i1	beta-hexosaminidase subunit alpha-like	2023	20	0	0.657
10462	c11600_g1_i1	vacuolar protein-sorting-associated protein 25-like	1744	20	1.58776e-63	0.7
10463	c11601_g1_i1	atrial natriuretic peptide-converting enzyme	2082	20	1.42205e-28	0.4675
10464	c11602_g1_i1	---NA---	416	0
10465	c11603_g1_i1	glutamic acid-rich protein	5498	20	9.31033e-45	0.65
10466	c11603_g1_i2	glutamic acid-rich protein	5471	20	8.06067e-45	0.65
10467	c11606_g1_i1	---NA---	665	0
10468	c11608_g1_i1	---NA---	443	0
10469	c11609_g1_i1	---NA---	599	0
966	c1161_g1_i1	---NA---	943	0
10470	c11610_g1_i1	coiled-coil domain-containing protein 58-like	1088	20	4.4718e-31	0.643
10471	c11611_g1_i1	protein orai-2-like	486	20	3.29512e-25	0.6905
10472	c11611_g1_i2	protein orai-2	695	20	1.51917e-24	0.6935
10473	c11614_g1_i1	---NA---	540	0
10474	c11615_g1_i1	---NA---	446	0
10475	c11616_g1_i1	apoptosis-linked protein 2	1335	20	5.26561e-67	0.746
10476	c11616_g2_i1	ataxin-2-like protein	1789	20	5.60621e-70	0.627
10477	c11616_g3_i1	protein associated with topo ii related - 1	1164	20	1.11334e-09	0.697
967	c1162_g1_i1	isoform c	2520	20	3.45157e-51	0.681
968	c1162_g1_i2	isoform c	2214	20	3.52027e-52	0.626
10478	c11620_g1_i1	---NA---	1941	0
10479	c11621_g1_i1	transmembrane protein 8a-like	288	8	1.83353e-09	0.5925
10480	c11628_g1_i1	---NA---	274	0
969	c1163_g1_i1	---NA---	1623	0
10481	c11630_g1_i1	ubiquitin-like-conjugating enzyme atg3-like	1199	20	1.8658e-134	0.7795
10482	c11631_g1_i1	---NA---	288	0
10483	c11635_g1_i1	isoform a	2793	20	0	0.755
10484	c11636_g1_i1	---NA---	2710	0
10485	c11639_g1_i1	---NA---	438	0
10486	c11639_g1_i2	---NA---	332	0
970	c1164_g1_i1	calponin transgelin	2070	20	1.37496e-83	0.822
10487	c11640_g1_i1	g-protein coupled	746	20	1.43973e-27	0.8095
10488	c11641_g1_i1	---NA---	315	0
10489	c11641_g2_i1	---NA---	300	0
10490	c11645_g1_i1	---NA---	207	0
10491	c11646_g1_i1	nucleolar gtp-binding protein 2	1063	20	9.38484e-25	0.7085
10492	c11648_g1_i1	relish	1830	20	0	0.6795
10493	c11648_g1_i2	relish	1959	20	0	0.6795
10494	c11649_g1_i1	---NA---	696	0
971	c1165_g1_i1	---NA---	570	0
10495	c11652_g1_i1	trna (5-methylaminomethyl-2-thiouridylate)-methyltransferase	1128	20	5.31329e-110	0.6675
10496	c11652_g1_i2	mitochondrial trna-specific 2-thiouridylase 1-like	1151	20	1.22407e-137	0.676
10497	c11654_g1_i1	serine arginine-rich splicing factor 7-like	1382	20	1.74674e-58	0.842
10498	c11654_g1_i2	splicing arginine serine-rich 7	1067	20	3.84141e-58	0.841
10499	c11656_g1_i1	---NA---	441	0
10500	c11657_g1_i1	---NA---	287	0
10501	c11658_g1_i1	---NA---	330	0
10502	c11658_g1_i2	---NA---	415	0
10503	c11658_g1_i3	---NA---	576	0
972	c1166_g1_i1	acetyl-coenzyme a synthetase 2- mitochondrial	2179	20	0	0.765
10504	c11660_g1_i1	---NA---	939	0
10505	c11663_g1_i1	---NA---	216	0
10506	c11664_g1_i1	---NA---	1476	0
10507	c11667_g1_i1	---NA---	227	0
10508	c11668_g1_i1	---NA---	360	0
973	c1167_g1_i1	protein st7 homolog	1166	20	0	0.8985
10509	c11672_g1_i1	d-aspartate oxidase	307	20	3.52742e-21	0.7065
10510	c11672_g1_i2	d-aspartate oxidase	925	20	2.49914e-66	0.5815
10511	c11673_g1_i1	---NA---	205	0
10512	c11676_g1_i1	---NA---	308	0
10513	c11676_g1_i2	---NA---	324	0
10514	c11678_g1_i1	---NA---	275	0
10515	c11679_g1_i1	---NA---	324	0
10516	c11680_g1_i1	---NA---	682	0
10517	c11681_g1_i1	---NA---	548	0
10518	c11681_g1_i2	---NA---	280	0
10519	c11682_g1_i1	---NA---	483	0
10520	c11686_g1_i1	---NA---	398	0
10521	c11688_g1_i1	---NA---	274	0
10522	c11689_g1_i1	---NA---	435	0
974	c1169_g1_i1	---NA---	211	0
10523	c11692_g1_i1	---NA---	955	0
10524	c11692_g2_i1	---NA---	702	0
10525	c11693_g1_i1	---NA---	511	0
10526	c11695_g1_i1	---NA---	1014	0
10527	c11697_g1_i1	---NA---	250	0
108	c117_g1_i1	---NA---	1004	0
10528	c11704_g1_i1	---NA---	204	0
10529	c11706_g1_i1	cuticle protein 7	1334	20	2.18289e-24	0.665
10530	c11707_g1_i1	---NA---	258	0
10531	c11708_g1_i1	---NA---	1600	0
10532	c11708_g1_i2	---NA---	1080	0
975	c1171_g1_i1	interferon regulatory factor 2-binding protein 2-like	3185	20	6.91506e-40	0.8305
976	c1171_g1_i2	interferon regulatory factor 2-binding protein 2-like	2942	20	6.115e-40	0.829
10533	c11710_g1_i1	---NA---	241	0
10534	c11711_g1_i1	---NA---	328	0
10535	c11712_g1_i1	---NA---	218	0
10536	c11714_g1_i1	---NA---	807	0
10537	c11714_g2_i1	---NA---	698	0
10538	c11716_g1_i1	---NA---	233	0
10539	c11717_g1_i1	---NA---	298	0
10540	c11719_g1_i1	---NA---	1041	0
977	c1172_g1_i1	---NA---	573	0
978	c1172_g1_i2	---NA---	587	0
10541	c11720_g1_i1	---NA---	279	0
10542	c11721_g1_i1	---NA---	220	0
10543	c11721_g2_i1	---NA---	216	0
10544	c11722_g1_i1	---NA---	661	0
10545	c11722_g1_i2	---NA---	707	0
10546	c11724_g1_i1	---NA---	683	0
10547	c11724_g1_i2	---NA---	412	0
10548	c11725_g1_i1	---NA---	207	0
10549	c11726_g1_i1	---NA---	557	0
10550	c11729_g1_i1	---NA---	202	0
979	c1173_g1_i1	isoform cra_a	2259	20	0	0.6595
980	c1173_g1_i2	isoform cra_a	2354	20	0	0.657
10551	c11730_g1_i1	---NA---	251	0
10552	c11731_g1_i1	---NA---	538	0
10553	c11737_g1_i1	---NA---	288	0
10554	c11739_g1_i1	coiled-coil domain-containing protein 134	1173	20	3.63537e-41	0.575
10555	c11739_g1_i2	coiled-coil domain-containing protein 134-like	994	10	6.01572e-12	0.579
981	c1174_g1_i1	---NA---	337	0
10556	c11741_g1_i1	---NA---	349	0
10557	c11741_g1_i2	---NA---	323	0
10558	c11741_g2_i1	---NA---	718	0
10559	c11742_g1_i1	---NA---	387	0
10560	c11743_g1_i1	---NA---	382	0
10561	c11744_g1_i1	organic cation transporter	1893	20	1.54699e-68	0.511
10562	c11747_g1_i1	---NA---	608	0
10563	c11748_g1_i1	---NA---	261	0
982	c1175_g1_i1	protein slit-like	1119	20	3.13367e-97	0.6355
983	c1175_g1_i2	protein slit-like	1038	20	1.89679e-97	0.638
10564	c11750_g1_i1	cytidine deaminase-like	822	20	2.41623e-49	0.741
10565	c11751_g1_i1	---NA---	371	0
10566	c11752_g1_i1	hypothetical protein UY3_10755	310	2	2.22085e-06	0.69
10567	c11753_g1_i1	---NA---	271	0
10568	c11753_g2_i1	---NA---	225	0
10569	c11754_g1_i1	---NA---	377	0
10570	c11756_g1_i1	PC1123hypothetical protein - bloodfluke planorb (fragment)	226	1	4.16652e-06	0.74
10571	c11758_g1_i1	---NA---	211	0
10572	c11759_g1_i1	---NA---	233	0
10573	c11760_g1_i1	reverse transcriptase	1560	1	8.74729e-07	0.7
10574	c11760_g1_i2	---NA---	1420	0
10575	c11760_g1_i3	---NA---	1531	0
10576	c11761_g1_i1	c-type lectin	1528	20	9.11376e-42	0.5095
10577	c11763_g1_i1	---NA---	496	0
10578	c11763_g2_i1	gamma-interferon-inducible lysosomal thiol reductase	745	20	2.19376e-42	0.5445
10579	c11764_g1_i1	---NA---	376	0
10580	c11765_g1_i1	---NA---	203	0
10581	c11766_g1_i1	methionine sulfoxide reductase b	705	20	7.99678e-52	0.735
10582	c11767_g1_i1	---NA---	324	0
10583	c11767_g1_i2	---NA---	219	0
10584	c11768_g1_i1	---NA---	332	0
10585	c11769_g1_i1	---NA---	230	0
10586	c11769_g1_i2	---NA---	208	0
984	c1177_g1_i1	---NA---	280	0
10587	c11771_g1_i1	---NA---	344	0
10588	c11777_g1_i1	---NA---	264	0
10589	c11779_g1_i1	thiopurine s-methyltransferase	969	20	3.30489e-53	0.6155
985	c1178_g1_i1	---NA---	358	0
10590	c11780_g1_i1	---NA---	681	0
10591	c11780_g2_i1	---NA---	719	0
10592	c11783_g1_i1	---NA---	400	0
10593	c11784_g1_i1	---NA---	308	0
10594	c11785_g1_i1	---NA---	1499	0
10595	c11787_g1_i1	---NA---	620	0
10596	c11788_g1_i1	---NA---	247	0
986	c1179_g1_i1	---NA---	460	0
10597	c11795_g1_i1	---NA---	485	0
10598	c11796_g1_i1	---NA---	201	0
10599	c11797_g1_i1	reverse transcriptase	262	1	5.00572e-09	0.55
109	c118_g1_i1	---NA---	340	0
987	c1180_g1_i1	---NA---	770	0
10600	c11803_g1_i1	---NA---	311	0
10601	c11804_g1_i1	---NA---	357	0
10602	c11804_g1_i2	---NA---	302	0
10603	c11806_g1_i1	---NA---	383	0
10604	c11810_g1_i1	---NA---	482	0
10605	c11811_g1_i1	conserved hypothetical protein	396	2	3.63556e-07	0.51
10606	c11815_g1_i1	---NA---	943	0
10607	c11815_g2_i1	---NA---	584	0
10608	c11818_g1_i1	---NA---	201	0
10609	c11820_g1_i1	---NA---	293	0
10610	c11821_g1_i1	---NA---	339	0
10611	c11822_g1_i1	---NA---	599	0
10612	c11822_g1_i2	---NA---	433	0
10613	c11822_g2_i1	---NA---	399	0
10614	c11823_g1_i1	---NA---	823	0
10615	c11824_g1_i1	---NA---	806	0
10616	c11826_g1_i1	latrophilin cirl-like isoform 1	248	20	3.11028e-22	0.846
10617	c11826_g1_i2	latrophilin cirl-like isoform 1	287	20	1.30183e-14	0.917
10618	c11826_g1_i3	---NA---	202	0
10619	c11827_g1_i1	---NA---	558	0
10620	c11827_g1_i2	---NA---	917	0
988	c1183_g1_i1	---NA---	673	0
10621	c11831_g1_i1	---NA---	654	0
10622	c11832_g1_i1	---NA---	212	0
10623	c11832_g1_i2	---NA---	240	0
10624	c11833_g1_i1	---NA---	240	0
10625	c11834_g1_i1	---NA---	367	0
10626	c11836_g1_i1	membrane magnesium transporter 1-like	1043	20	2.28247e-39	0.7945
10627	c11836_g1_i2	membrane magnesium transporter 1-like	990	20	3.41976e-21	0.7745
10628	c11838_g1_i1	---NA---	816	0
10629	c11838_g1_i2	---NA---	399	0
989	c1184_g1_i1	---NA---	609	0
10630	c11840_g1_i1	---NA---	594	0
10631	c11841_g1_i1	alkaline tissue-nonspecific isozyme	728	20	1.32085e-60	0.64
10632	c11842_g1_i1	---NA---	225	0
10633	c11844_g1_i1	PREDICTED: uncharacterized protein LOC101847339	359	20	4.92967e-12	0.5465
10634	c11845_g1_i1	---NA---	487	0
10635	c11845_g1_i2	---NA---	212	0
10636	c11847_g1_i1	---NA---	822	0
10637	c11848_g1_i1	---NA---	235	0
10638	c11855_g1_i1	camp-regulated phosphoprotein 19	1044	20	6.87548e-30	0.7115
10639	c11855_g2_i1	---NA---	589	0
10640	c11856_g1_i1	---NA---	842	0
10641	c11857_g1_i1	---NA---	622	0
10642	c11858_g1_i1	---NA---	502	0
990	c1186_g1_i1	potassium channel subfamily k member 9-like	296	20	1.95007e-40	0.8145
991	c1186_g1_i2	two pore potassium channel protein sup-9-like	306	20	1.46698e-25	0.8085
10643	c11860_g1_i1	ubiquitin-fold modifier 1-like	834	20	3.37988e-46	0.952
10644	c11861_g1_i1	cam snf1	342	12	5.12322e-07	0.5483
10645	c11861_g1_i2	cam snf1	480	9	1.68785e-06	0.5533
10646	c11862_g1_i1	spermine oxidase	1572	20	8.61314e-19	0.554
10647	c11863_g1_i1	nadh-cytochrome b5 reductase-like	1656	20	1.07984e-76	0.616
10648	c11864_g1_i1	organic cation	792	20	2.08929e-11	0.615
10649	c11865_g1_i1	---NA---	463	0
10650	c11867_g1_i1	ribose-phosphate pyrophosphokinase 1-like isoform 1	2319	20	0	0.9495
992	c1187_g1_i1	---NA---	420	0
10651	c11871_g1_i1	---NA---	359	0
10652	c11871_g1_i2	---NA---	2267	0
10653	c11874_g1_i1	probable ribonuclease zc3h12c-like	3731	20	1.48533e-110	0.6705
10654	c11877_g1_i1	zinc finger protein 570-like isoform 2	443	20	2.15164e-20	0.6335
10655	c11877_g1_i2	zinc c2h2 type family protein	427	20	5.67712e-17	0.6335
10656	c11879_g1_i1	---NA---	255	0
10657	c11881_g1_i1	---NA---	725	0
10658	c11883_g1_i1	---NA---	211	0
10659	c11883_g1_i2	---NA---	201	0
10660	c11884_g1_i1	transcription elongation factor b polypeptide 1	1559	20	3.40609e-69	0.9625
10661	c11886_g1_i1	---NA---	1172	0
10662	c11886_g1_i2	---NA---	655	0
10663	c11888_g1_i1	---NA---	456	0
10664	c11889_g1_i1	protein extra bases-like	2051	20	2.69793e-166	0.7585
10666	c11889_g1_i2	protein extra bases-like	2251	20	1.0058e-164	0.758
10667	c11889_g1_i3	protein extra bases-like	2183	20	1.0861e-165	0.7585
10665	c11889_g2_i1	---NA---	834	0
993	c1189_g1_i1	---NA---	228	0
994	c1189_g1_i2	---NA---	235	0
10668	c11890_g1_i1	peroxisomal biogenesis factor 19	1111	20	3.62555e-42	0.5815
10669	c11891_g1_i1	cdgsh iron-sulfur domain-containing protein mitochondrial	947	20	1.13932e-22	0.642
10670	c11891_g1_i2	cdgsh iron-sulfur domain-containing protein mitochondrial	1112	20	1.58836e-22	0.6365
10671	c11891_g1_i3	cdgsh iron-sulfur domain-containing protein mitochondrial	955	20	9.14777e-23	0.6425
10672	c11892_g1_i1	---NA---	263	0
10673	c11893_g1_i1	isoform v	349	20	1.33451e-08	0.6
10674	c11894_g1_i1	---NA---	1138	0
10675	c11894_g1_i2	---NA---	1163	0
10676	c11894_g1_i3	---NA---	2426	0
10677	c11895_g1_i1	---NA---	3032	0
10678	c11896_g1_i1	---NA---	886	0
10679	c11896_g1_i2	---NA---	1081	0
995	c1190_g1_i1	glutathione peroxidase 6	261	20	1.6505e-49	0.718
10680	c11900_g1_i1	c-myc-binding protein	1778	20	6.11916e-13	0.6315
10681	c11901_g1_i1	---NA---	326	0
10682	c11902_g1_i1	---NA---	283	0
10683	c11902_g1_i2	---NA---	351	0
10684	c11904_g1_i1	---NA---	206	0
10685	c11905_g1_i1	---NA---	218	0
10686	c11906_g1_i1	---NA---	586	0
10687	c11906_g1_i2	---NA---	858	0
10688	c11907_g1_i1	---NA---	306	0
10689	c11907_g1_i2	---NA---	327	0
10690	c11908_g1_i1	pol-like protein	215	5	4.70556e-11	0.65
10691	c11911_g1_i1	hypothetical protein LOTGIDRAFT_116457, partial	785	3	3.12146e-08	0.49
10692	c11913_g1_i1	---NA---	223	0
10693	c11914_g1_i1	protein lsm14 homolog b-like	2006	20	4.09413e-29	0.7405
10694	c11914_g2_i1	e1a-binding protein	649	20	2.53093e-58	0.716
10695	c11919_g1_i1	forkhead box subgroup partial	2465	20	3.42451e-88	0.686
10696	c11919_g1_i2	---NA---	908	0
10697	c11919_g1_i3	forkhead box subgroup partial	1968	20	7.5774e-90	0.685
996	c1192_g1_i1	---NA---	956	0
10698	c11921_g1_i1	---NA---	631	0
10699	c11924_g1_i1	---NA---	574	0
10700	c11924_g2_i1	---NA---	1138	0
10701	c11927_g1_i1	---NA---	354	0
10702	c11927_g1_i2	cell growth regulator with ring finger domain protein 1-like	1472	20	4.24761e-46	0.505
10703	c11929_g1_i1	membrane-associated progesterone receptor component 1-like	2587	20	6.88494e-75	0.77
997	c1193_g1_i1	---NA---	430	0
10704	c11930_g1_i1	---NA---	385	0
10705	c11930_g1_i2	---NA---	374	0
10706	c11932_g1_i1	---NA---	684	0
10707	c11932_g2_i1	---NA---	1286	0
10708	c11933_g1_i1	lethal k09913	2329	20	1.20964e-73	0.6095
10709	c11933_g1_i2	lethal k09913	2183	20	5.27292e-74	0.6095
10710	c11935_g1_i1	---NA---	665	0
10711	c11936_g1_i1	protein lethal essential for life-like	1256	20	3.89225e-19	0.5175
10712	c11938_g1_i1	---NA---	862	0
10713	c11938_g1_i2	---NA---	815	0
998	c1194_g1_i1	---NA---	535	0
10714	c11940_g1_i1	---NA---	293	0
10715	c11940_g1_i2	---NA---	300	0
10716	c11941_g1_i1	---NA---	209	0
10717	c11943_g1_i1	nucleolysin tiar-like	2120	20	0	0.7245
10718	c11943_g1_i2	nucleolysin tiar-like	2150	20	0	0.7245
10719	c11944_g1_i1	protein sda1 homolog isoform x1	2288	20	0	0.6795
10720	c11944_g1_i2	protein sda1 homolog isoform x1	2362	20	0	0.6805
10721	c11945_g1_i1	forkhead box protein p4	2108	20	4.53923e-34	0.809
10722	c11946_g1_i1	myosin heavy chain type 2	1048	20	1.06918e-113	0.7985
10723	c11947_g1_i1	---NA---	213	0
10724	c11948_g1_i1	hypothetical protein NEMVEDRAFT_v1g147352	242	2	1.53526e-06	0.545
10725	c11948_g1_i2	uncharacterized threonine-rich gpi-anchored glyco	740	14	7.49791e-13	0.5557
10726	c11948_g1_i3	protein	785	18	5.24641e-14	0.5428
10727	c11948_g2_i1	---NA---	286	0
10728	c11949_g1_i1	cubilin-like	6118	20	0	0.475
10729	c11949_g1_i2	cubilin-like	6105	20	0	0.4845
10730	c11949_g1_i3	cubilin-like	6082	20	0	0.4785
10731	c11949_g1_i4	cubilin	5115	20	0	0.478
999	c1195_g1_i1	---NA---	247	0
1000	c1195_g1_i2	---NA---	223	0
10732	c11950_g1_i1	---NA---	634	0
10733	c11951_g1_i1	---NA---	2207	0
10734	c11952_g1_i1	isoform e	1553	20	1.25203e-83	0.8
10735	c11952_g1_i2	protein outspread-like	2495	20	1.68197e-143	0.778
10736	c11952_g1_i3	protein outspread	1522	20	4.00357e-56	0.579
10737	c11953_g1_i1	---NA---	840	0
10738	c11955_g1_i1	---NA---	517	0
10739	c11956_g1_i1	---NA---	561	0
10740	c11962_g1_i1	inositol-trisphosphate 3-kinase a-like	2194	20	8.77187e-103	0.7095
10741	c11963_g1_i1	trafficking protein particle complex subunit 5-like	1213	20	6.50032e-90	0.8385
10742	c11965_g1_i1	small integral membrane protein 20	315	20	3.70285e-25	0.6825
10743	c11965_g1_i2	small integral membrane protein 20	307	20	2.83327e-25	0.68
10744	c11965_g1_i3	small integral membrane protein 20	462	20	1.92743e-24	0.6755
10745	c11966_g1_i1	hypothetical protein CAPTEDRAFT_199770	548	1	1.15384e-07	0.75
1001	c1197_g1_i1	---NA---	292	0
10746	c11970_g1_i1	---NA---	439	0
10747	c11971_g1_i1	---NA---	388	0
10748	c11971_g2_i1	---NA---	744	0
10749	c11974_g1_i1	---NA---	453	0
10750	c11975_g1_i1	---NA---	427	0
10751	c11975_g1_i2	---NA---	362	0
10752	c11976_g1_i1	hypothetical protein TBLA_0G01210	346	1	3.43539e-07	0.67
10753	c11977_g1_i1	e3 ubiquitin-protein ligase rbbp6-like	3757	20	3.36212e-84	0.606
10754	c11977_g1_i2	e3 ubiquitin-protein ligase rbbp6-like	4108	20	6.68266e-84	0.606
10755	c11977_g1_i3	e3 ubiquitin-protein ligase rbbp6-like	4081	20	6.34123e-84	0.606
10756	c11978_g1_i1	phosphorylase kinase gamma	912	20	5.86493e-90	0.745
10757	c11978_g1_i2	phosphorylase kinase gamma	870	20	1.40173e-93	0.7325
10758	c11979_g1_i1	---NA---	590	0
10759	c11979_g2_i1	---NA---	491	0
10760	c11979_g3_i1	---NA---	320	0
1002	c1198_g1_i1	---NA---	698	0
10761	c11980_g1_i1	---NA---	1139	0
10762	c11981_g1_i1	epididymal secretory glutathione peroxidase	334	20	1.55677e-16	0.621
10763	c11981_g1_i2	selenium-dependent glutathione peroxidase	1135	20	2.38291e-60	0.6245
10764	c11982_g1_i1	---NA---	731	0
10766	c11982_g1_i2	---NA---	760	0
10765	c11982_g2_i1	---NA---	990	0
10767	c11983_g1_i1	---NA---	792	0
10768	c11984_g1_i1	---NA---	1606	0
10769	c11987_g1_i1	hypothetical protein DAPPUDRAFT_250987	1938	3	8.29999e-09	0.4767
10770	c11988_g1_i1	nucleolar and coiled-body phosphoprotein 1-like isoform x2	1488	20	9.75561e-15	0.8195
10771	c11989_g1_i1	tubulin alpha-1b partial	503	20	6.77028e-88	0.95
10772	c11989_g1_i2	alpha partial	280	20	1.12508e-33	0.9365
1003	c1199_g1_i1	intestinal-type alkaline phosphatase-like	513	20	4.52722e-43	0.658
10773	c11990_g1_i1	isoform cra_a	245	20	5.63258e-18	0.6685
10774	c11991_g1_i1	---NA---	219	0
10775	c11991_g2_i1	---NA---	612	0
10776	c11991_g2_i2	---NA---	370	0
10777	c11991_g2_i3	---NA---	306	0
10778	c11991_g3_i1	---NA---	285	0
10779	c11992_g1_i1	---NA---	419	0
10780	c11992_g1_i2	---NA---	483	0
10781	c11994_g1_i1	---NA---	1016	0
10782	c11996_g1_i1	d-beta-hydroxybutyrate mitochondrial	2300	20	1.00904e-76	0.6165
110	c120_g1_i1	---NA---	376	0
1004	c1200_g1_i1	---NA---	672	0
1005	c1200_g2_i1	zinc finger protein 271- partial	1261	20	2.25703e-45	0.7105
10783	c12001_g1_i1	---NA---	589	0
10784	c12002_g1_i1	---NA---	390	0
10785	c12002_g1_i2	sideroflexin 3	987	20	8.87191e-165	0.835
10786	c12002_g1_i3	sideroflexin-1-like isoform x1	1231	20	6.90864e-173	0.825
10787	c12003_g1_i1	PREDICTED: similar to GA10108-PA	1780	20	1.34528e-126	0.664
10788	c12005_g1_i1	dolichyl-diphosphooligosaccharide--protein glycosyltransferase subunit stt3a	2830	20	0	0.897
10789	c12005_g1_i2	dolichyl-diphosphooligosaccharide--protein glycosyltransferase subunit stt3a	2806	20	0	0.8965
10790	c12006_g1_i1	---NA---	566	0
10791	c12007_g1_i1	---NA---	665	0
10792	c12008_g1_i1	---NA---	1527	0
10793	c12008_g2_i1	---NA---	1886	0
10794	c12009_g1_i1	---NA---	219	0
10795	c12009_g1_i2	---NA---	206	0
1006	c1201_g1_i1	---NA---	457	0
10796	c12010_g1_i1	---NA---	1034	0
10797	c12011_g1_i1	---NA---	1967	0
10798	c12012_g1_i1	zinc finger protein 474-like	2028	20	2.01339e-68	0.636
10799	c12012_g1_i2	zinc finger protein 474-like	2194	20	8.69145e-68	0.6395
10800	c12014_g1_i1	---NA---	1603	0
10801	c12014_g2_i1	---NA---	631	0
10802	c12017_g1_i1	poly	2316	20	2.66343e-55	0.506
1007	c1202_g1_i1	band 3 anion transport protein	725	20	2.06432e-69	0.67
10803	c12021_g1_i1	ace-paralogous acetylcholinesterase	928	20	1.48317e-125	0.7965
10804	c12022_g1_i1	---NA---	320	0
10805	c12022_g1_i2	---NA---	236	0
10806	c12024_g1_i1	---NA---	1331	0
10807	c12024_g1_i2	---NA---	1283	0
10808	c12024_g2_i1	---NA---	814	0
10809	c12027_g1_i1	signal recognition particle 19 kda protein	1219	20	1.53086e-34	0.667
1008	c1203_g1_i1	---NA---	231	0
1009	c1203_g2_i1	---NA---	404	0
10810	c12031_g1_i1	---NA---	1934	0
10811	c12034_g1_i1	voltage-dependent calcium channel gamma-2 subunit-like	1564	20	1.07882e-53	0.5665
10812	c12036_g1_i1	---NA---	216	0
10813	c12036_g2_i1	---NA---	395	0
1010	c1204_g1_i1	---NA---	398	0
10814	c12040_g1_i1	---NA---	692	0
10815	c12040_g1_i2	---NA---	585	0
10816	c12041_g1_i1	---NA---	1157	0
10817	c12041_g2_i1	---NA---	1951	0
10818	c12042_g1_i1	---NA---	248	0
10819	c12043_g1_i1	phosphatase and actin regulator	2895	20	7.02657e-85	0.7205
10820	c12044_g1_i1	sterol regulatory element-binding protein 1	4223	20	0	0.5695
10821	c12045_g1_i1	pre-mrna-processing factor 40 homolog a-like	3058	20	0	0.7525
10822	c12045_g1_i2	pre-mrna-processing factor 40 homolog a-like	2984	20	0	0.7525
10823	c12045_g2_i1	---NA---	371	0
10824	c12047_g1_i1	---NA---	696	0
1011	c1205_g1_i1	---NA---	284	0
10825	c12050_g1_i1	---NA---	725	0
10826	c12050_g1_i2	---NA---	315	0
10827	c12051_g1_i1	---NA---	435	0
10828	c12051_g1_i2	---NA---	278	0
10829	c12053_g1_i1	---NA---	1306	0
10830	c12053_g2_i1	lethal k09913 cg3082-pc	1896	20	3.49725e-19	0.479
10831	c12053_g3_i1	---NA---	222	0
10832	c12054_g1_i1	---NA---	384	0
10833	c12056_g1_i1	---NA---	4967	0
10834	c12056_g1_i2	---NA---	6153	0
10835	c12057_g1_i1	---NA---	241	0
10836	c12058_g1_i1	forkhead box protein k2-like	5883	20	4.74423e-157	0.6855
10837	c12058_g1_i2	forkhead box protein k2-like	5868	20	1.75652e-159	0.693
10838	c12059_g1_i1	---NA---	483	0
1012	c1206_g1_i1	---NA---	1266	0
10839	c12060_g1_i1	---NA---	1506	0
10840	c12061_g1_i1	---NA---	362	0
10841	c12062_g1_i1	---NA---	1231	0
10842	c12063_g1_i1	---NA---	588	0
10843	c12063_g2_i1	---NA---	347	0
10844	c12063_g2_i2	---NA---	377	0
10845	c12064_g1_i1	---NA---	2319	0
10846	c12065_g1_i1	cytochrome p450	1324	20	1.23733e-119	0.7565
10847	c12065_g2_i1	cytochrome p450	1181	20	2.49566e-143	0.7365
[truncated: 61,265 more rows]
