# Supplementary material for: Comparative molecular analyses of select pH- and osmoregulatory genes in three freshwater crayfish Cherax quadricarinatus, C. destructor and C. cainii
Source: PeerJ. 2017 Aug 24;5:e3623. doi: 10.7717/peerj.3623 (PMC5572425; doi:10.7717/peerj.3623)
Supplement: File S7 — Annotated information of all the assembled contings obtained from Hepatopancreas of freshwater crayfish Cherax quadricarinatus. Reads which met our quality criteria (Q > 30, N bases <1%) were accepted for assembly. The filtered reads were assembled with the Trinity short read de novo assembler using the stranded option for Illumina data (Version 2014-04-13p1) and the unstranded option for Ion Torrent data. Assembled data were used as BLASTx queries against the NCBI NR protein database using BLAST + (Version 2.2.29) with a stringency of 10 × e−5. First row contains information on: number of original contigs, sequence length (contig length bp), seq. description (gene names), number of HITs and mean e-values (stringency). [file peerj-05-3623-s009.xlsx]

## Sheet: seq_table_Hepato
Contig #	Seq. Name	Seq. Description	Seq. Length	#Hits	min. eValue	mean Similarity
3551	c8243_g1_i1	: flagellar basal body protein	275	20	3.04277e-12	0.796
41603	c44740_g2_i2	10 kda heat shock mitochondrial-like	697	20	1.53837e-24	0.7865
41604	c44740_g2_i3	10 kda heat shock mitochondrial-like	417	20	9.44622e-26	0.781
41605	c44740_g2_i4	10 kda heat shock mitochondrial-like	284	20	1.92531e-24	0.808
41606	c44740_g2_i5	10 kda heat shock mitochondrial-like	615	20	7.98818e-25	0.7865
41607	c44740_g2_i6	10 kda heat shock mitochondrial-like	286	20	6.29778e-24	0.8055
41608	c44740_g2_i7	10 kda heat shock mitochondrial-like	507	20	3.02057e-25	0.7865
41609	c44740_g2_i8	10 kda heat shock mitochondrial-like	348	20	4.73266e-26	0.774
41610	c44740_g2_i9	10 kda heat shock mitochondrial-like	622	20	8.60649e-25	0.7865
41611	c44740_g2_i10	10 kda heat shock mitochondrial-like	608	20	7.59654e-25	0.7865
41612	c44740_g2_i11	10 kda heat shock mitochondrial-like	372	20	8.05426e-25	0.776
48657	c45582_g1_i1	10-formyltetrahydrofolate dehydrogenase	1190	20	3.86968e-97	0.647
48658	c45582_g1_i2	10-formyltetrahydrofolate dehydrogenase	1183	20	6.9599e-98	0.646
4736	c11083_g1_i1	116 kda u5 small nuclear ribonucleoprotein component	216	20	2.8149e-32	0.981
9151	c22044_g1_i1	116 kda u5 small nuclear ribonucleoprotein component	212	20	5.15215e-33	0.993
25359	c40468_g1_i1	116 kda u5 small nuclear ribonucleoprotein component isoform x1	249	20	2.29975e-34	0.9425
25360	c40468_g1_i2	116 kda u5 small nuclear ribonucleoprotein component isoform x1	285	20	7.84439e-47	0.9395
5266	c12306_g1_i1	116 kda u5 small nuclear ribonucleoprotein component isoform x2	224	20	4.26836e-25	0.7395
18623	c36047_g1_i1	116 kda u5 small nuclear ribonucleoprotein component-like	228	20	1.41757e-16	0.8635
18624	c36047_g1_i2	116 kda u5 small nuclear ribonucleoprotein component-like	330	20	9.80202e-32	0.846
66965	c55004_g1_i1	116 kda u5 small nuclear ribonucleoprotein component-like	243	20	1.2481e-19	0.5955
65756	c53445_g1_i1	1200014j11rik partial	230	20	4.58642e-08	0.628
17540	c35106_g1_i2	14 kda phosphohistidine phosphatase	356	20	2.28946e-36	0.727
40208	c44532_g1_i1	14-3-3 protein epsilon	775	20	8.939e-125	0.946
40209	c44532_g1_i2	14-3-3 protein epsilon	1009	20	2.05494e-159	0.9515
40210	c44532_g1_i3	14-3-3 protein epsilon	1008	20	2.05494e-159	0.9515
31726	c42787_g2_i1	14-3-3 zeta	2460	20	2.9193e-172	0.958
1674	c3987_g1_i1	15 kda selenoprotein	639	20	1.00868e-56	0.72
1675	c3987_g1_i2	15 kda selenoprotein	302	6	5.71306e-15	0.7733
35035	c43618_g1_i3	150 kda oxygen-regulated protein	738	10	4.26152e-08	0.719
9612	c23089_g1_i2	15-hydroxyprostaglandin dehydrogenase	274	20	9.06199e-10	0.6845
4905	c11447_g1_i1	18 wheeler	355	20	9.04273e-63	0.778
4906	c11447_g1_i2	18 wheeler	364	20	1.0488e-58	0.774
20355	c37504_g1_i1	1-acylglycerol-3-phosphate acyltransferase	294	20	6.64569e-15	0.737
27782	c41483_g1_i1	1-acylglycerol-3-phosphate acyltransferase	514	20	1.19751e-52	0.765
35874	c43793_g1_i3	1-acylglycerol-3-phosphate o-acyltransferase 4-like protein	222	1	1.09442e-15	0.95
15624	c32911_g1_i1	1-acylglycerol-3-phosphate o-acyltransferase abhd5-like	379	2	1.1394e-08	0.645
35872	c43793_g1_i1	1-acyl-sn-glycerol-3-phosphate acyltransferase delta	500	20	6.63897e-58	0.617
35873	c43793_g1_i2	1-acyl-sn-glycerol-3-phosphate acyltransferase delta	320	20	7.45968e-36	0.6695
14293	c31306_g1_i2	1-acyl-sn-glycerol-3-phosphate acyltransferase epsilon	357	20	4.31252e-11	0.501
17040	c34545_g1_i3	1-acyl-sn-glycerol-3-phosphate acyltransferase epsilon	259	20	9.36648e-16	0.5845
32676	c43046_g1_i1	1-acyl-sn-glycerol-3-phosphate acyltransferase epsilon	220	5	2.07488e-14	0.766
32677	c43046_g2_i1	1-acyl-sn-glycerol-3-phosphate acyltransferase epsilon	416	20	2.33159e-16	0.6735
32678	c43046_g1_i2	1-acyl-sn-glycerol-3-phosphate acyltransferase epsilon	306	20	3.68925e-15	0.688
20356	c37504_g1_i2	1-acyl-sn-glycerol-3-phosphate acyltransferase gamma-like	284	20	1.24306e-09	0.706
63198	c50173_g1_i1	1-aminocyclopropane-1-carboxylate partial	232	20	2.40491e-39	0.936
61277	c47669_g1_i1	1-aminocyclopropane-1-carboxylate synthase-like protein 1	222	20	1.70732e-18	0.7135
17506	c35071_g1_i1	1-associated eps domain-containing	416	20	3.58717e-50	0.7365
1449	c3480_g1_i1	1-phosphatidylinositol- -bisphosphate phosphodiesterase classes i and ii	335	20	7.23261e-25	0.7065
6813	c16448_g1_i1	1-phosphatidylinositol- -bisphosphate phosphodiesterase classes i and ii	315	20	6.04543e-28	0.816
6814	c16448_g1_i2	1-phosphatidylinositol- -bisphosphate phosphodiesterase classes i and ii	325	20	1.38038e-30	0.817
23583	c39520_g1_i1	1-phosphatidylinositol- -bisphosphate phosphodiesterase classes i and ii	358	8	1.69348e-09	0.585
23584	c39520_g1_i2	1-phosphatidylinositol- -bisphosphate phosphodiesterase classes i and ii	430	8	1.12905e-09	0.585
52242	c45941_g2_i1	1-phosphatidylinositol -bisphosphate phosphodiesterase delta-1	340	20	8.60642e-22	0.7375
30337	c42367_g1_i5	1-phosphatidylinositol -bisphosphate phosphodiesterase delta-3	322	20	6.7907e-13	0.5885
34475	c43483_g1_i3	1-phosphatidylinositol -bisphosphate phosphodiesterase eta-2	243	20	3.32832e-16	0.68
22080	c38680_g1_i1	1-phosphatidylinositol -bisphosphate phosphodiesterase gamma-1	274	20	1.30866e-15	0.737
114	c237_g1_i1	1-phosphatidylinositol- -bisphosphate phosphodiesterase gamma-1	205	20	6.82407e-23	0.752
34473	c43483_g1_i1	1-phosphatidylinositol- -bisphosphate phosphodiesterase gamma-1	252	20	1.95245e-19	0.6765
34474	c43483_g1_i2	1-phosphatidylinositol- -bisphosphate phosphodiesterase gamma-1	254	20	2.78986e-19	0.6815
66436	c54345_g1_i1	1-phosphatidylinositol- -bisphosphate phosphodiesterase gamma-1	304	20	3.25259e-21	0.6245
896	c2200_g1_i1	2 -5 rna ligase	379	20	1.8905e-09	0.5655
24330	c39970_g1_i2	20s proteasome subunit alpha 7	212	1	5.63127e-07	0.63
65390	c52992_g1_i1	24-dehydrocholesterol reductase	202	20	3.97116e-14	0.81
41976	c44788_g1_i4	26s protease regulatory subunit 10b	249	20	2.17972e-19	0.9965
24098	c39826_g1_i1	26s protease regulatory subunit 10b-like	349	20	1.26428e-29	0.991
26164	c40811_g1_i2	26s protease regulatory subunit 4	438	20	3.58028e-78	0.945
26166	c40811_g1_i4	26s protease regulatory subunit 4	467	20	6.15685e-91	0.947
54115	c46122_g1_i1	26s protease regulatory subunit 4 isoform 2	1321	20	8.77915e-166	0.97
26165	c40811_g1_i3	26s protease regulatory subunit 4-like	237	20	1.51313e-37	0.946
26167	c40811_g1_i5	26s protease regulatory subunit 4-like	225	20	2.85441e-32	0.8945
26152	c40807_g1_i1	26s protease regulatory subunit 6a	1033	20	8.38193e-162	0.9785
26153	c40807_g1_i2	26s protease regulatory subunit 6a	1295	20	0	0.9405
26155	c40807_g1_i4	26s protease regulatory subunit 6a	943	20	1.47998e-144	0.963
26156	c40807_g1_i5	26s protease regulatory subunit 6a	1188	20	0	0.9675
26157	c40807_g1_i6	26s protease regulatory subunit 6a	300	20	1.07797e-35	0.919
26154	c40807_g1_i3	26s protease regulatory subunit 6a-like	546	20	1.06115e-99	0.938
23174	c39297_g1_i1	26s protease regulatory subunit 6b	268	20	2.75947e-36	0.997
23177	c39297_g2_i1	26s protease regulatory subunit 6b-like	302	20	7.3043e-40	0.9765
17064	c34562_g1_i1	26s protease regulatory subunit 7	208	20	3.98948e-10	0.7875
17065	c34562_g1_i2	26s protease regulatory subunit 7	311	20	9.19661e-11	0.6885
50076	c45731_g1_i1	26s protease regulatory subunit 7	407	20	1.88153e-76	0.982
50077	c45731_g1_i2	26s protease regulatory subunit 7	736	20	1.46794e-161	0.99
50078	c45731_g1_i3	26s protease regulatory subunit 7	1107	20	0	0.9825
50079	c45731_g1_i4	26s protease regulatory subunit 7	988	20	0	0.98
50081	c45731_g1_i6	26s protease regulatory subunit 7	1285	20	0	0.9825
50082	c45731_g1_i7	26s protease regulatory subunit 7	1044	20	3.80696e-156	0.9845
50083	c45731_g1_i8	26s protease regulatory subunit 7	457	20	3.48781e-80	0.959
50084	c45731_g1_i9	26s protease regulatory subunit 7	959	20	0	0.9795
50085	c45731_g1_i10	26s protease regulatory subunit 7	1357	20	0	0.9825
50086	c45731_g1_i11	26s protease regulatory subunit 7	1085	20	0	0.9815
50087	c45731_g1_i12	26s protease regulatory subunit 7	1254	20	0	0.9825
50088	c45731_g1_i13	26s protease regulatory subunit 7	1342	20	0	0.9825
50089	c45731_g1_i14	26s protease regulatory subunit 7	1287	20	0	0.989
50080	c45731_g1_i5	26s protease regulatory subunit 7-like	689	20	6.1867e-87	0.9815
17071	c34570_g1_i1	26s protease regulatory subunit 8	272	20	1.38014e-23	0.952
17073	c34570_g2_i2	26s protease regulatory subunit 8	252	20	1.72603e-39	1
16131	c33523_g1_i3	26s protease regulatory subunit 8-like	207	20	3.48888e-33	0.9645
17072	c34570_g2_i1	26s protease regulatory subunit 8-like	462	20	4.48153e-85	1
56815	c46367_g3_i1	26s protease regulatory subunit s10b	608	20	1.45416e-116	0.964
56817	c46367_g3_i3	26s protease regulatory subunit s10b	656	20	2.72774e-116	0.964
56821	c46367_g3_i7	26s protease regulatory subunit s10b	845	20	3.13179e-84	0.9555
56822	c46367_g3_i8	26s protease regulatory subunit s10b	668	20	1.76278e-38	0.904
56825	c46367_g3_i10	26s protease regulatory subunit s10b	392	20	7.66444e-70	0.9605
11023	c25918_g1_i1	26s proteasome non-atpase regulatory partial	226	3	3.67769e-09	0.7167
20236	c37417_g1_i1	26s proteasome non-atpase regulatory subunit 1	268	20	3.42862e-17	0.7765
20237	c37417_g1_i2	26s proteasome non-atpase regulatory subunit 1	370	20	2.01175e-18	0.7675
34201	c43419_g2_i1	26s proteasome non-atpase regulatory subunit 1	367	20	7.61857e-46	0.8685
34202	c43419_g2_i2	26s proteasome non-atpase regulatory subunit 1	679	20	5.13159e-87	0.863
34203	c43419_g2_i3	26s proteasome non-atpase regulatory subunit 1	253	20	8.48006e-23	0.8305
34204	c43419_g2_i4	26s proteasome non-atpase regulatory subunit 1	343	20	3.0214e-27	0.8755
58413	c46506_g1_i1	26s proteasome non-atpase regulatory subunit 1	425	20	5.17487e-36	0.6535
58416	c46506_g1_i4	26s proteasome non-atpase regulatory subunit 1	375	20	2.21161e-25	0.6465
45111	c45190_g2_i1	26s proteasome non-atpase regulatory subunit 10	210	20	4.01118e-11	0.783
45113	c45190_g1_i4	26s proteasome non-atpase regulatory subunit 10	358	20	2.31531e-20	0.7375
45109	c45190_g1_i1	26s proteasome non-atpase regulatory subunit 10 isoform x1	681	20	1.2463e-30	0.669
45110	c45190_g1_i2	26s proteasome non-atpase regulatory subunit 10 isoform x1	620	20	3.32566e-31	0.6705
45112	c45190_g1_i3	26s proteasome non-atpase regulatory subunit 10 isoform x1	574	20	2.61073e-31	0.6705
25018	c40315_g1_i3	26s proteasome non-atpase regulatory subunit 11	306	20	2.33687e-15	0.916
21773	c38466_g1_i1	26s proteasome non-atpase regulatory subunit 11-like	282	20	5.55879e-16	0.79
25016	c40315_g1_i1	26s proteasome non-atpase regulatory subunit 11-like	323	20	4.2381e-16	0.822
25017	c40315_g1_i2	26s proteasome non-atpase regulatory subunit 11-like	693	20	4.30175e-60	0.9285
25019	c40315_g2_i1	26s proteasome non-atpase regulatory subunit 11-like	216	20	7.0011e-16	0.7715
25020	c40315_g2_i2	26s proteasome non-atpase regulatory subunit 11-like	234	20	1.55239e-23	0.7815
16631	c34047_g1_i1	26s proteasome non-atpase regulatory subunit 12	224	20	1.13815e-22	0.8515
37614	c44124_g1_i2	26s proteasome non-atpase regulatory subunit 12	549	20	6.51254e-60	0.7495
37617	c44124_g1_i5	26s proteasome non-atpase regulatory subunit 12	473	20	7.24387e-47	0.7605
37618	c44124_g1_i6	26s proteasome non-atpase regulatory subunit 12	574	20	5.8398e-61	0.7495
37619	c44124_g1_i7	26s proteasome non-atpase regulatory subunit 12	546	20	4.20081e-61	0.7495
37613	c44124_g1_i1	26s proteasome non-atpase regulatory subunit 12 isoform x2	369	20	2.67379e-37	0.7535
37615	c44124_g1_i3	26s proteasome non-atpase regulatory subunit 12 isoform x2	368	20	8.38947e-37	0.755
29455	c42076_g1_i1	26s proteasome non-atpase regulatory subunit 12-like	394	20	2.04042e-58	0.858
29456	c42076_g1_i2	26s proteasome non-atpase regulatory subunit 12-like	285	20	6.37739e-37	0.8335
29457	c42076_g1_i3	26s proteasome non-atpase regulatory subunit 12-like	417	20	1.4917e-37	0.764
37616	c44124_g1_i4	26s proteasome non-atpase regulatory subunit 12-like	251	20	3.82161e-16	0.7485
1295	c3169_g1_i1	26s proteasome non-atpase regulatory subunit 13	404	20	7.12495e-09	0.607
24151	c39871_g1_i2	26s proteasome non-atpase regulatory subunit 13	395	20	2.18036e-51	0.7785
34809	c43570_g1_i3	26s proteasome non-atpase regulatory subunit 13	248	20	1.11836e-13	0.8635
656	c1584_g1_i1	26s proteasome non-atpase regulatory subunit 13-like	233	20	4.1875e-22	0.7015
24150	c39871_g1_i1	26s proteasome non-atpase regulatory subunit 13-like	444	20	9.60578e-53	0.781
24152	c39871_g1_i3	26s proteasome non-atpase regulatory subunit 13-like	274	20	1.46047e-23	0.774
24153	c39871_g1_i4	26s proteasome non-atpase regulatory subunit 13-like	312	20	1.68296e-36	0.7805
52322	c45949_g4_i1	26s proteasome non-atpase regulatory subunit 14	463	20	1.90168e-52	0.8725
52327	c45949_g4_i2	26s proteasome non-atpase regulatory subunit 14	688	20	3.95983e-87	0.89
58414	c46506_g1_i2	26s proteasome non-atpase regulatory subunit 1-like	348	20	5.05093e-18	0.632
26512	c40959_g1_i1	26s proteasome non-atpase regulatory subunit 2	677	20	1.02913e-65	0.8
26515	c40959_g1_i3	26s proteasome non-atpase regulatory subunit 2	641	20	2.52106e-59	0.79
26516	c40959_g1_i4	26s proteasome non-atpase regulatory subunit 2	226	20	2.73916e-24	0.8205
26517	c40959_g1_i5	26s proteasome non-atpase regulatory subunit 2	650	20	2.86604e-63	0.802
26518	c40959_g1_i6	26s proteasome non-atpase regulatory subunit 2	553	20	3.30915e-63	0.7965
30162	c42309_g1_i2	26s proteasome non-atpase regulatory subunit 2	303	20	4.3464e-21	0.7955
30163	c42309_g1_i3	26s proteasome non-atpase regulatory subunit 2	336	20	3.15912e-25	0.787
45370	c45223_g1_i11	26s proteasome non-atpase regulatory subunit 2	289	20	7.49249e-47	0.95
45372	c45223_g1_i13	26s proteasome non-atpase regulatory subunit 2	375	20	2.37133e-48	0.8765
48661	c45583_g1_i2	26s proteasome non-atpase regulatory subunit 2	679	20	1.48662e-74	0.975
48663	c45583_g1_i4	26s proteasome non-atpase regulatory subunit 2	573	20	5.9446e-67	0.9185
48664	c45583_g1_i5	26s proteasome non-atpase regulatory subunit 2	410	20	5.97744e-48	0.96
48665	c45583_g1_i6	26s proteasome non-atpase regulatory subunit 2	829	20	1.32123e-107	0.975
48666	c45583_g1_i7	26s proteasome non-atpase regulatory subunit 2	708	20	6.42371e-85	0.912
48667	c45583_g1_i8	26s proteasome non-atpase regulatory subunit 2	941	20	4.16482e-138	0.941
30161	c42309_g1_i1	26s proteasome non-atpase regulatory subunit 2 isoform x2	357	20	4.23841e-25	0.7925
26519	c40959_g3_i1	26s proteasome non-atpase regulatory subunit 2-like	265	20	6.62639e-14	0.8715
45362	c45223_g1_i3	26s proteasome non-atpase regulatory subunit 2-like	469	20	3.13966e-70	0.903
45369	c45223_g1_i10	26s proteasome non-atpase regulatory subunit 2-like	379	20	2.75054e-47	0.9
48662	c45583_g1_i3	26s proteasome non-atpase regulatory subunit 2-like	616	20	6.64057e-69	0.918
32554	c43011_g1_i1	26s proteasome non-atpase regulatory subunit 3	585	20	2.03315e-64	0.778
32555	c43011_g1_i2	26s proteasome non-atpase regulatory subunit 3	654	20	1.08484e-63	0.778
32556	c43011_g1_i3	26s proteasome non-atpase regulatory subunit 3	430	20	5.45298e-57	0.785
32569	c43016_g1_i2	26s proteasome non-atpase regulatory subunit 4-like	671	20	2.89317e-18	0.6245
32570	c43016_g1_i3	26s proteasome non-atpase regulatory subunit 4-like	574	20	8.10637e-19	0.6035
32571	c43016_g1_i4	26s proteasome non-atpase regulatory subunit 4-like	483	20	4.26643e-19	0.6245
32573	c43016_g1_i6	26s proteasome non-atpase regulatory subunit 4-like	515	20	2.24941e-13	0.6185
45037	c45181_g1_i3	26s proteasome non-atpase regulatory subunit 4-like	332	20	6.04203e-42	0.828
45038	c45181_g1_i4	26s proteasome non-atpase regulatory subunit 4-like	660	20	5.90943e-65	0.8285
45039	c45181_g1_i5	26s proteasome non-atpase regulatory subunit 4-like	603	20	2.98758e-65	0.8285
45042	c45181_g1_i8	26s proteasome non-atpase regulatory subunit 4-like	589	20	2.58266e-65	0.8285
45048	c45181_g3_i1	26s proteasome non-atpase regulatory subunit 4-like	212	20	6.25536e-22	0.863
11338	c26469_g1_i1	26s proteasome non-atpase regulatory subunit 5	432	20	8.73966e-18	0.5465
11339	c26469_g1_i2	26s proteasome non-atpase regulatory subunit 5-like	264	6	3.44859e-09	0.6467
10797	c25512_g1_i1	26s proteasome non-atpase regulatory subunit 6	201	20	2.24164e-22	0.8405
10798	c25512_g1_i2	26s proteasome non-atpase regulatory subunit 6	247	20	1.34196e-31	0.91
20189	c37374_g1_i1	26s proteasome non-atpase regulatory subunit 6	236	20	2.2881e-21	0.768
20191	c37374_g1_i3	26s proteasome non-atpase regulatory subunit 6	366	20	2.44924e-37	0.774
20190	c37374_g1_i2	26s proteasome non-atpase regulatory subunit 6-like	488	20	1.01319e-62	0.779
30667	c42470_g1_i1	26s proteasome non-atpase regulatory subunit 6-like	335	20	2.91927e-25	0.6805
30668	c42470_g1_i2	26s proteasome non-atpase regulatory subunit 6-like	312	20	2.7495e-35	0.926
30669	c42470_g1_i3	26s proteasome non-atpase regulatory subunit 6-like	272	20	2.06371e-27	0.8885
30670	c42470_g1_i4	26s proteasome non-atpase regulatory subunit 6-like	318	20	2.96583e-35	0.926
57614	c46434_g3_i1	26s proteasome non-atpase regulatory subunit 6-like	296	20	5.59078e-34	0.7705
32137	c42899_g1_i2	26s proteasome non-atpase regulatory subunit 7	930	20	7.74152e-133	0.8775
32139	c42899_g1_i4	26s proteasome non-atpase regulatory subunit 7	928	20	1.53443e-137	0.883
32136	c42899_g1_i1	26s proteasome non-atpase regulatory subunit 7-like	298	20	1.09776e-14	0.8455
32138	c42899_g1_i3	26s proteasome non-atpase regulatory subunit 7-like	585	20	1.62232e-89	0.871
17412	c34925_g1_i1	26s proteasome non-atpase regulatory subunit 8	269	20	1.00735e-15	0.6695
17413	c34925_g1_i2	26s proteasome non-atpase regulatory subunit 8	325	20	1.30847e-23	0.691
25698	c40618_g1_i1	26s proteasome non-atpase regulatory subunit 8	603	20	3.75897e-64	0.7855
25699	c40618_g1_i2	26s proteasome non-atpase regulatory subunit 8	217	20	2.45156e-11	0.901
25701	c40618_g1_i4	26s proteasome non-atpase regulatory subunit 8	490	20	3.40955e-50	0.8205
25702	c40618_g1_i5	26s proteasome non-atpase regulatory subunit 8	631	20	8.71263e-64	0.786
6647	c16023_g1_i1	26s proteasome non-atpase regulatory subunit 9-like	291	20	6.85415e-12	0.7765
25585	c40563_g1_i2	26s proteasome non-atpase regulatory subunit 9-like	388	20	1.63671e-22	0.7775
25584	c40563_g1_i1	26s proteasome non-atpase regulatory subunit 9-like isoform 2	481	20	3.22543e-26	0.789
25915	c40719_g1_i1	26s proteasome non-atpase regulatory subunit partial	263	20	8.59712e-32	0.968
6593	c15878_g1_i1	26s proteasome regulatory	228	20	6.81148e-17	0.8935
24099	c39826_g1_i2	26s proteasome regulatory atpase subunit 10b	273	20	8.66112e-27	0.999
15789	c33093_g1_i1	26s proteasome regulatory subunit	227	20	6.98822e-13	0.791
16132	c33523_g1_i4	26s proteasome regulatory subunit	240	1	6.34631e-06	0.61
22090	c38684_g1_i1	26s proteasome regulatory subunit s3	353	20	2.24486e-23	0.764
22093	c38684_g1_i2	26s proteasome regulatory subunit s3	303	20	1.23701e-23	0.764
22094	c38684_g1_i3	26s proteasome regulatory subunit s3	326	20	1.64344e-23	0.764
34813	c43570_g1_i7	26s proteasome subunit	464	20	5.21136e-12	0.864
29197	c41988_g1_i4	28 kda heat- and acid-stable phosphoprotein	848	19	7.78588e-11	0.7458
3841	c9028_g1_i2	28s ribosomal protein mitochondrial	448	20	2.48507e-42	0.7905
6920	c16751_g1_i1	28s ribosomal protein mitochondrial	219	20	1.22419e-16	0.6885
12693	c28683_g1_i1	28s ribosomal protein mitochondrial	282	20	1.2917e-15	0.6685
12694	c28683_g1_i2	28s ribosomal protein mitochondrial	325	20	1.09002e-14	0.69
14065	c30953_g1_i1	28s ribosomal protein mitochondrial	325	20	8.50373e-10	0.7475
14709	c31863_g1_i1	28s ribosomal protein mitochondrial	357	20	9.18543e-33	0.714
14883	c32061_g1_i1	28s ribosomal protein mitochondrial	295	20	2.62986e-12	0.803
14884	c32061_g1_i2	28s ribosomal protein mitochondrial	224	20	4.93772e-11	0.803
17109	c34614_g1_i1	28s ribosomal protein mitochondrial	314	20	5.4584e-49	0.8065
21969	c38604_g1_i1	28s ribosomal protein mitochondrial	369	20	2.41916e-20	0.6165
32022	c42866_g1_i2	28s ribosomal protein mitochondrial	334	19	2.69891e-17	0.6447
10680	c25298_g1_i1	28s ribosomal protein mitochondrial precursor	225	20	1.67234e-17	0.8365
3403	c7919_g1_i1	28s ribosomal protein mitochondrial-like	229	20	6.82759e-15	0.8555
3840	c9028_g1_i1	28s ribosomal protein mitochondrial-like	330	20	1.05591e-32	0.8095
5304	c12390_g1_i1	28s ribosomal protein mitochondrial-like	370	20	2.38936e-25	0.6615
10999	c25880_g1_i1	28s ribosomal protein mitochondrial-like	304	20	1.05111e-14	0.685
12215	c27786_g1_i1	28s ribosomal protein mitochondrial-like	419	20	3.2713e-19	0.676
14046	c30927_g1_i1	28s ribosomal protein mitochondrial-like	453	20	3.82548e-12	0.597
14710	c31863_g1_i2	28s ribosomal protein mitochondrial-like	421	20	4.45737e-43	0.72
16606	c34024_g1_i1	28s ribosomal protein mitochondrial-like	350	20	7.24643e-49	0.8495
16608	c34024_g1_i3	28s ribosomal protein mitochondrial-like	269	20	3.05487e-23	0.8075
17110	c34614_g1_i2	28s ribosomal protein mitochondrial-like	538	20	4.58731e-57	0.743
20586	c37656_g1_i1	28s ribosomal protein mitochondrial-like	238	20	9.34816e-18	0.8015
20587	c37656_g1_i2	28s ribosomal protein mitochondrial-like	202	5	2.57561e-12	0.772
20589	c37656_g1_i3	28s ribosomal protein mitochondrial-like	253	20	6.38289e-17	0.8
20590	c37656_g1_i4	28s ribosomal protein mitochondrial-like	287	20	1.04145e-18	0.787
20927	c37858_g1_i1	28s ribosomal protein mitochondrial-like	428	20	5.343e-27	0.7855
20928	c37858_g1_i2	28s ribosomal protein mitochondrial-like	334	20	2.14013e-14	0.692
31603	c42748_g1_i1	28s ribosomal protein mitochondrial-like	387	20	8.4105e-13	0.581
31604	c42748_g1_i2	28s ribosomal protein mitochondrial-like	512	20	1.73065e-13	0.5785
32021	c42866_g1_i1	28s ribosomal protein mitochondrial-like	697	20	3.18974e-54	0.7255
32023	c42866_g1_i3	28s ribosomal protein mitochondrial-like	365	20	1.85056e-34	0.78
32561	c43013_g1_i1	28s ribosomal protein mitochondrial-like	319	20	1.26734e-29	0.7955
32562	c43013_g1_i2	28s ribosomal protein mitochondrial-like	433	20	2.12211e-49	0.704
32563	c43013_g1_i3	28s ribosomal protein mitochondrial-like	235	20	9.58125e-24	0.785
35225	c43658_g1_i2	28s ribosomal protein mitochondrial-like	651	20	3.15887e-53	0.6425
35226	c43658_g1_i3	28s ribosomal protein mitochondrial-like	868	20	4.48142e-54	0.64
35227	c43658_g1_i4	28s ribosomal protein mitochondrial-like	353	20	3.87134e-14	0.622
35228	c43658_g1_i5	28s ribosomal protein mitochondrial-like	788	20	3.38772e-54	0.6525
35229	c43658_g1_i6	28s ribosomal protein mitochondrial-like	813	20	2.48237e-54	0.6385
35230	c43658_g1_i7	28s ribosomal protein mitochondrial-like	433	20	1.37231e-24	0.638
38339	c44248_g1_i1	28s ribosomal protein mitochondrial-like	701	20	5.93922e-38	0.676
39344	c44409_g1_i6	28s ribosomal protein mitochondrial-like	274	20	8.06348e-13	0.69
39872	c44480_g1_i2	28s ribosomal protein mitochondrial-like	374	20	1.00179e-21	0.6335
39873	c44480_g1_i3	28s ribosomal protein mitochondrial-like	559	20	6.997e-45	0.668
39874	c44480_g1_i4	28s ribosomal protein mitochondrial-like	841	20	3.65915e-75	0.695
39875	c44480_g1_i5	28s ribosomal protein mitochondrial-like	652	20	5.00469e-60	0.669
39877	c44480_g1_i7	28s ribosomal protein mitochondrial-like	741	20	1.42971e-75	0.6945
39878	c44480_g1_i8	28s ribosomal protein mitochondrial-like	1101	20	1.14385e-73	0.695
53739	c46086_g2_i5	28s ribosomal protein mitochondrial-like	321	20	1.88279e-16	0.8275
63304	c50304_g1_i1	28s ribosomal protein mitochondrial-like	359	20	1.77426e-18	0.526
66007	c53776_g1_i1	28s ribosomal protein mitochondrial-like	292	1	8.48273e-07	0.57
2243	c5274_g1_i1	2-acylglycerol o-acyltransferase 1	211	20	2.65348e-14	0.7535
13655	c30355_g1_i1	2-acylglycerol o-acyltransferase 1	269	20	7.93333e-20	0.7415
13656	c30355_g1_i2	2-acylglycerol o-acyltransferase 1	366	20	1.25934e-28	0.727
13658	c30355_g1_i4	2-acylglycerol o-acyltransferase 1	358	20	6.26683e-22	0.72
9068	c21839_g1_i1	2-acylglycerol o-acyltransferase 2	240	20	9.31736e-12	0.7375
13657	c30355_g1_i3	2-acylglycerol o-acyltransferase 2	331	20	2.87787e-20	0.749
63080	c50026_g1_i1	2-amino-3-ketobutyrate coenzyme a mitochondrial	216	20	3.31338e-18	0.7415
47	c98_g1_i1	2-aminoethanethiol dioxygenase	320	20	2.32664e-13	0.568
13558	c30209_g1_i1	2-hydroxyacid dehydrogenase	567	20	1.68399e-93	0.9745
13560	c30209_g1_i3	2-hydroxyacid dehydrogenase	696	20	8.7244e-93	0.9745
17874	c35389_g1_i1	2-hydroxyacid dehydrogenase	374	20	1.14455e-60	0.952
17876	c35389_g1_i3	2-hydroxyacid dehydrogenase	226	20	9.61724e-33	0.9
17877	c35389_g1_i4	2-hydroxyacid dehydrogenase	430	20	1.99787e-75	0.924
25184	c40390_g1_i2	2-hydroxyacid dehydrogenase	391	20	4.57612e-10	0.5585
55538	c46255_g1_i3	2-hydroxyacyl- lyase 1	392	20	4.29058e-10	0.808
55542	c46255_g1_i5	2-hydroxyacyl- lyase 1	3468	15	1.19248e-07	0.8067
60332	c46670_g1_i2	2-hydroxyacyl- lyase 1	1108	20	1.46268e-107	0.747
60334	c46670_g1_i3	2-hydroxyacyl- lyase 1	323	20	6.08068e-29	0.6885
60335	c46670_g1_i4	2-hydroxyacyl- lyase 1	344	20	7.83986e-29	0.687
60338	c46670_g1_i6	2-hydroxyacyl- lyase 1	1134	20	1.27799e-136	0.747
60339	c46670_g1_i7	2-hydroxyacyl- lyase 1	207	20	2.05876e-12	0.799
60341	c46670_g1_i9	2-hydroxyacyl- lyase 1	312	20	9.29356e-15	0.586
60342	c46670_g1_i10	2-hydroxyacyl- lyase 1	1807	20	0	0.739
60343	c46670_g1_i11	2-hydroxyacyl- lyase 1	1864	20	0	0.745
60345	c46670_g1_i13	2-hydroxyacyl- lyase 1	1753	20	0	0.745
60331	c46670_g1_i1	2-hydroxyacyl- lyase 1-like	1267	20	7.55394e-160	0.734
60336	c46670_g1_i5	2-hydroxyacyl- lyase 1-like	220	20	1.32576e-17	0.709
60340	c46670_g1_i8	2-hydroxyacyl- lyase 1-like	474	20	3.96366e-44	0.723
60344	c46670_g1_i12	2-hydroxyacyl- lyase 1-like	281	20	3.0221e-38	0.8695
57825	c46453_g2_i2	2-hydroxyacylsphingosine 1-beta-galactosyltransferase-like	1750	20	3.88868e-49	0.663
57832	c46453_g2_i7	2-hydroxyacylsphingosine 1-beta-galactosyltransferase-like	1715	20	3.78145e-49	0.667
57833	c46453_g2_i8	2-hydroxyacylsphingosine 1-beta-galactosyltransferase-like	1941	20	1.96992e-56	0.558
50232	c45747_g2_i2	2-hydroxymuconic semialdehyde dehydrogenase	206	3	6.29768e-07	0.84
32334	c42945_g1_i2	2-methoxy-6-polyprenyl- -benzoquinol mitochondrial isoform x2	215	20	3.91511e-07	0.8265
32335	c42945_g1_i3	2-methoxy-6-polyprenyl- -benzoquinol mitochondrial-like	432	20	5.67762e-32	0.6825
3530	c8181_g1_i1	2og-fe oxygenase	274	2	8.20018e-06	0.735
49878	c45710_g4_i1	2og-fe oxygenase	339	20	2.12565e-22	0.565
63987	c51186_g1_i1	2og-fe oxygenase	445	20	1.35217e-22	0.575
9547	c22909_g1_i1	2-oxoglutarate and iron-dependent oxygenase domain-containing protein 1	298	20	6.98522e-36	0.8485
13888	c30685_g1_i1	2-oxoglutarate and iron-dependent oxygenase domain-containing protein 1	391	20	1.07359e-22	0.6145
13937	c30759_g1_i1	2-oxoglutarate and iron-dependent oxygenase domain-containing protein 2	295	20	4.5413e-10	0.568
13938	c30759_g1_i2	2-oxoglutarate and iron-dependent oxygenase domain-containing protein 2	279	20	7.4415e-11	0.575
29020	c41927_g1_i1	2-oxoglutarate and iron-dependent oxygenase domain-containing protein 2-like	213	20	1.49707e-18	0.74
29021	c41927_g2_i1	2-oxoglutarate and iron-dependent oxygenase domain-containing protein 2-like	354	20	4.51257e-40	0.7145
29022	c41927_g2_i2	2-oxoglutarate and iron-dependent oxygenase domain-containing protein 2-like	299	20	3.00747e-28	0.685
3157	c7402_g1_i1	2-oxoglutarate and iron-dependent oxygenase domain-containing protein 3-like	237	20	1.18682e-26	0.8595
3306	c7706_g1_i1	2-oxoglutarate dehydrogenase	240	20	2.56921e-15	0.688
38878	c44339_g4_i1	2-oxoglutarate dehydrogenase	325	20	1.57555e-49	0.9055
23826	c39660_g1_i2	2-oxoglutarate dehydrogenase e1 mitochondrial	302	20	1.14219e-45	0.881
20113	c37328_g1_i1	2-oxoglutarate mitochondrial-like	1085	20	5.27159e-162	0.8835
20114	c37328_g1_i2	2-oxoglutarate mitochondrial-like	656	20	7.75554e-93	0.863
20115	c37328_g1_i3	2-oxoglutarate mitochondrial-like	976	20	1.50067e-148	0.906
20116	c37328_g1_i4	2-oxoglutarate mitochondrial-like	960	20	7.20288e-146	0.903
23825	c39660_g1_i1	2-oxoglutarate mitochondrial-like	396	20	2.70812e-41	0.814
23827	c39660_g1_i3	2-oxoglutarate mitochondrial-like	571	20	3.33941e-86	0.841
6267	c14916_g1_i1	2-oxoisovalerate dehydrogenase subunit beta	204	20	8.32229e-19	0.918
1311	c3204_g1_i1	2-oxoisovalerate dehydrogenase subunit mitochondrial	206	20	3.90851e-19	0.845
7913	c19152_g1_i1	2-oxoisovalerate dehydrogenase subunit mitochondrial	225	20	3.33856e-16	0.7375
25493	c40523_g1_i3	2-oxoisovalerate dehydrogenase subunit mitochondrial	439	20	9.2085e-55	0.9085
60584	c46807_g1_i1	2-oxoisovalerate dehydrogenase subunit mitochondrial	274	20	4.03472e-31	0.8215
17088	c34598_g1_i1	2-oxoisovalerate dehydrogenase subunit mitochondrial-like	219	20	3.19124e-15	0.9105
25491	c40523_g1_i1	2-oxoisovalerate dehydrogenase subunit mitochondrial-like	331	20	6.27562e-48	0.8415
25492	c40523_g1_i2	2-oxoisovalerate dehydrogenase subunit mitochondrial-like	605	20	9.60693e-79	0.8785
55017	c46213_g1_i1	3 beta-hydroxysteroid dehydrogenase delta 5--	1912	20	3.67465e-29	0.4365
55021	c46213_g1_i5	3 beta-hydroxysteroid dehydrogenase delta 5--	1808	20	3.16565e-29	0.4365
19115	c36483_g1_i1	3 -phosphoadenosine 5 -phosphosulfate synthase 1	333	20	4.33053e-52	0.891
7197	c17596_g1_i2	39s ribosomal protein mitochondrial	328	20	1.22713e-22	0.731
22845	c39108_g1_i1	39s ribosomal protein mitochondrial	291	20	4.12252e-10	0.6195
23760	c39626_g1_i1	39s ribosomal protein mitochondrial	419	20	1.27861e-27	0.849
23762	c39626_g1_i3	39s ribosomal protein mitochondrial	368	20	1.01978e-27	0.849
23763	c39626_g1_i4	39s ribosomal protein mitochondrial	324	20	6.00641e-28	0.845
24083	c39817_g1_i3	39s ribosomal protein mitochondrial	428	20	1.47426e-39	0.783
24470	c40036_g1_i1	39s ribosomal protein mitochondrial	511	20	6.64652e-36	0.656
24471	c40036_g1_i2	39s ribosomal protein mitochondrial	608	20	5.5666e-50	0.678
24472	c40036_g1_i3	39s ribosomal protein mitochondrial	828	20	3.78155e-49	0.678
25489	c40522_g1_i1	39s ribosomal protein mitochondrial	217	20	2.45005e-13	0.852
25490	c40522_g1_i2	39s ribosomal protein mitochondrial	267	20	9.51854e-15	0.766
25510	c40537_g1_i1	39s ribosomal protein mitochondrial	380	20	2.89715e-30	0.832
25513	c40537_g1_i3	39s ribosomal protein mitochondrial	651	20	9.65507e-78	0.799
25521	c40540_g1_i2	39s ribosomal protein mitochondrial	463	20	1.39782e-10	0.5515
26398	c40903_g1_i1	39s ribosomal protein mitochondrial	264	20	1.19695e-14	0.781
26399	c40903_g1_i2	39s ribosomal protein mitochondrial	380	20	1.49138e-14	0.7755
27088	c41206_g1_i2	39s ribosomal protein mitochondrial	492	20	4.32365e-16	0.6835
27089	c41206_g1_i3	39s ribosomal protein mitochondrial	733	20	4.44861e-38	0.659
31725	c42787_g1_i1	39s ribosomal protein mitochondrial	1075	20	1.08236e-112	0.767
32214	c42916_g1_i1	39s ribosomal protein mitochondrial	345	20	4.90432e-17	0.72
32636	c43034_g1_i1	39s ribosomal protein mitochondrial	612	20	3.90924e-53	0.728
32637	c43034_g1_i2	39s ribosomal protein mitochondrial	431	20	8.78987e-31	0.7875
32638	c43034_g1_i3	39s ribosomal protein mitochondrial	283	20	8.66041e-22	0.6825
32639	c43034_g1_i4	39s ribosomal protein mitochondrial	641	20	6.0064e-54	0.729
35429	c43703_g2_i1	39s ribosomal protein mitochondrial	204	20	2.17138e-09	0.665
36436	c43902_g1_i1	39s ribosomal protein mitochondrial	461	20	4.51958e-34	0.742
51148	c45832_g2_i3	39s ribosomal protein mitochondrial	439	20	1.18975e-41	0.691
51151	c45832_g2_i5	39s ribosomal protein mitochondrial	580	20	8.99661e-41	0.69
51153	c45832_g2_i7	39s ribosomal protein mitochondrial	480	20	3.02116e-41	0.694
62602	c49396_g1_i1	39s ribosomal protein mitochondrial	246	20	6.23955e-19	0.7795
4705	c11025_g1_i1	39s ribosomal protein mitochondrial-like	344	20	5.31583e-23	0.711
5173	c12042_g1_i1	39s ribosomal protein mitochondrial-like	252	6	8.86472e-10	0.7083
7196	c17596_g1_i1	39s ribosomal protein mitochondrial-like	242	20	1.68862e-21	0.754
9686	c23228_g1_i1	39s ribosomal protein mitochondrial-like	262	20	6.98565e-13	0.693
10807	c25527_g1_i1	39s ribosomal protein mitochondrial-like	330	20	7.46551e-17	0.7905
13134	c29500_g1_i1	39s ribosomal protein mitochondrial-like	281	20	6.05281e-23	0.7305
14233	c31199_g1_i1	39s ribosomal protein mitochondrial-like	432	20	2.59105e-38	0.725
15423	c32653_g1_i1	39s ribosomal protein mitochondrial-like	396	20	3.03194e-25	0.624
15425	c32653_g1_i3	39s ribosomal protein mitochondrial-like	586	20	1.15711e-40	0.608
16879	c34349_g1_i2	39s ribosomal protein mitochondrial-like	444	20	3.7544e-24	0.6795
16880	c34349_g1_i3	39s ribosomal protein mitochondrial-like	388	20	1.09597e-24	0.7155
18015	c35496_g1_i1	39s ribosomal protein mitochondrial-like	547	20	1.08295e-27	0.6175
18947	c36340_g1_i1	39s ribosomal protein mitochondrial-like	334	20	9.34617e-15	0.618
19000	c36391_g1_i1	39s ribosomal protein mitochondrial-like	407	20	1.91162e-57	0.7715
20507	c37606_g1_i1	39s ribosomal protein mitochondrial-like	548	20	1.15004e-30	0.671
20668	c37706_g1_i1	39s ribosomal protein mitochondrial-like	222	20	1.10289e-18	0.7205
20677	c37712_g1_i2	39s ribosomal protein mitochondrial-like	575	20	1.10998e-59	0.7565
20678	c37712_g1_i3	39s ribosomal protein mitochondrial-like	543	20	7.46145e-60	0.7565
20994	c37909_g1_i1	39s ribosomal protein mitochondrial-like	239	20	3.31786e-28	0.7335
24081	c39817_g1_i1	39s ribosomal protein mitochondrial-like	582	20	2.77638e-39	0.7875
24082	c39817_g1_i2	39s ribosomal protein mitochondrial-like	274	20	3.50914e-22	0.847
24084	c39817_g1_i4	39s ribosomal protein mitochondrial-like	290	20	1.44455e-28	0.811
24229	c39914_g1_i1	39s ribosomal protein mitochondrial-like	454	20	6.33875e-17	0.6225
24230	c39914_g1_i2	39s ribosomal protein mitochondrial-like	487	20	4.14555e-17	0.614
24474	c40036_g2_i2	39s ribosomal protein mitochondrial-like	336	20	6.14423e-12	0.6725
25514	c40537_g1_i4	39s ribosomal protein mitochondrial-like	808	20	2.13791e-97	0.8105
25515	c40537_g1_i5	39s ribosomal protein mitochondrial-like	720	20	6.22072e-89	0.8095
25520	c40540_g1_i1	39s ribosomal protein mitochondrial-like	562	20	4.3701e-27	0.624
25522	c40540_g1_i3	39s ribosomal protein mitochondrial-like	744	20	3.27976e-54	0.673
26400	c40903_g1_i3	39s ribosomal protein mitochondrial-like	335	20	9.69183e-15	0.809
27087	c41206_g1_i1	39s ribosomal protein mitochondrial-like	310	20	1.8055e-14	0.636
29523	c42101_g1_i1	39s ribosomal protein mitochondrial-like	386	20	2.7223e-14	0.6435
29525	c42101_g1_i2	39s ribosomal protein mitochondrial-like	548	20	4.8956e-21	0.6705
29526	c42101_g1_i3	39s ribosomal protein mitochondrial-like	405	20	4.67097e-18	0.7155
36437	c43902_g1_i2	39s ribosomal protein mitochondrial-like	266	20	8.79164e-19	0.777
38471	c44267_g2_i1	39s ribosomal protein mitochondrial-like	295	20	6.62645e-23	0.6225
40011	c44501_g1_i2	39s ribosomal protein mitochondrial-like	663	20	2.81972e-26	0.672
45684	c45256_g2_i1	39s ribosomal protein mitochondrial-like	426	20	3.10077e-17	0.7245
51144	c45832_g2_i1	39s ribosomal protein mitochondrial-like	774	20	2.11694e-19	0.718
51154	c45832_g2_i8	39s ribosomal protein mitochondrial-like	876	20	3.16448e-19	0.718
63344	c50358_g1_i1	39s ribosomal protein mitochondrial-like	253	4	1.16526e-11	0.595
53480	c46058_g2_i2	3-hydroxy-2-methylbutyryl- dehydrogenase	381	20	1.27127e-16	0.8205
61858	c48443_g1_i1	3-hydroxy-3-methylglutaryl-coenzyme a reductase	252	20	1.64595e-09	0.7935
66970	c55012_g1_i1	3-hydroxy-3-methylglutaryl-coenzyme a reductase	272	20	1.75479e-09	0.7805
22613	c39001_g1_i1	3-hydroxyacyl- dehydratase-like	251	20	1.4502e-21	0.703
53484	c46058_g1_i2	3-hydroxyacyl- dehydrogenase type-2-like	576	20	6.2984e-70	0.836
56911	c46376_g1_i1	3-hydroxyacyl-coa dehyrogenase	404	20	7.32693e-51	0.7375
57044	c46388_g2_i2	3-hydroxyacyl-coa dehyrogenase	251	20	2.84697e-28	0.8015
39197	c44389_g1_i1	3-hydroxyanthranilate -dioxygenase	893	20	6.93229e-65	0.7575
39198	c44389_g1_i2	3-hydroxyanthranilate -dioxygenase	1402	20	8.07714e-68	0.762
39199	c44389_g1_i3	3-hydroxyanthranilate -dioxygenase	1396	20	8.02673e-68	0.762
27051	c41190_g1_i5	3-hydroxybutyrate dehydrogenase	207	20	3.23701e-12	0.7295
30463	c42407_g1_i1	3-hydroxybutyrate dehydrogenase	208	10	1.02789e-09	0.642
33568	c43270_g1_i1	3-hydroxybutyrate dehydrogenase type 2	1124	20	5.42282e-54	0.694
24608	c40106_g1_i1	3-hydroxyisobutyrate dehydrogenase	417	20	4.38618e-39	0.64
37372	c44087_g1_i2	3-hydroxyisobutyrate dehydrogenase	1138	20	4.6457e-51	0.5845
37373	c44087_g1_i3	3-hydroxyisobutyrate dehydrogenase	1019	20	3.54991e-51	0.5845
2013	c4673_g1_i1	3-hydroxyisobutyryl- mitochondrial	362	20	1.86902e-17	0.7365
2014	c4673_g1_i2	3-hydroxyisobutyryl- mitochondrial	368	20	6.00032e-17	0.731
55854	c46284_g2_i1	3-hydroxyisobutyryl- mitochondrial-like	1491	20	1.79939e-52	0.784
55856	c46284_g2_i3	3-hydroxyisobutyryl- mitochondrial-like	804	20	4.63504e-55	0.784
55861	c46284_g2_i5	3-hydroxyisobutyryl- mitochondrial-like	793	20	4.07932e-55	0.784
55867	c46284_g2_i8	3-hydroxyisobutyryl- mitochondrial-like	1353	20	2.38915e-45	0.881
48643	c45579_g1_i1	3-ketoacyl- mitochondrial	1494	20	0	0.813
48644	c45579_g1_i2	3-ketoacyl- mitochondrial	1514	20	0	0.813
57998	c46468_g2_i11	3-ketoacyl-acp reductase	266	20	6.54477e-15	0.634
1881	c4360_g1_i1	3-ketodihydrosphingosine reductase	201	20	1.11627e-09	0.6685
10570	c25051_g1_i1	3-methyl-2-oxobutanoate dehydrogenase	257	20	3.04722e-24	0.771
9881	c23637_g1_i1	3-oxoacyl-	340	20	1.91499e-45	0.786
9882	c23637_g1_i2	3-oxoacyl-	342	20	2.14196e-16	0.776
57994	c46468_g2_i7	3-oxoacyl-acyl-carrier-protein reductase	365	20	4.37115e-28	0.6305
8922	c21548_g1_i1	3-phosphoinositide-dependent protein kinase 1-like	480	20	7.19799e-33	0.692
8923	c21548_g1_i2	3-phosphoinositide-dependent protein kinase 1-like	602	20	7.75836e-44	0.6895
17028	c34540_g1_i3	3-phosphoinositide-dependent protein kinase 1-like	268	20	1.63952e-28	0.84
17029	c34540_g1_i4	3-phosphoinositide-dependent protein kinase 1-like	528	20	8.35562e-68	0.7555
62010	c48630_g1_i1	3-phosphoinositide-dependent protein kinase 1-like	241	20	1.6051e-20	0.74
4296	c10059_g1_i1	40s ribosomal protein	267	20	3.18894e-28	0.8155
41	c89_g1_i1	40s ribosomal protein mitochondrial-like isoform x2	530	20	2.79144e-29	0.9285
15209	c32414_g1_i1	40s ribosomal protein s10	469	20	2.64013e-41	0.7715
19039	c36419_g1_i1	40s ribosomal protein s11	542	20	9.95476e-96	0.868
4297	c10059_g1_i2	40s ribosomal protein s12	212	20	5.67356e-28	0.8135
9935	c23726_g1_i1	40s ribosomal protein s12	217	1	2.97461e-06	0.66
14596	c31724_g2_i1	40s ribosomal protein s15	473	20	7.2358e-59	0.8965
66229	c54098_g1_i1	40s ribosomal protein s15a	484	20	1.91512e-83	0.952
21000	c37915_g1_i1	40s ribosomal protein s16-like protein	495	20	1.32827e-84	0.9165
20948	c37873_g1_i1	40s ribosomal protein s17-like	507	20	2.19369e-45	0.9085
10500	c24920_g1_i1	40s ribosomal protein s19a	537	20	6.89353e-85	0.857
16143	c33541_g1_i1	40s ribosomal protein s20	556	20	4.96722e-63	0.951
12654	c28620_g1_i1	40s ribosomal protein s21-like protein	422	20	5.94515e-49	0.8965
29850	c42209_g1_i1	40s ribosomal protein s23-like	535	20	6.59558e-95	0.972
31161	c42629_g1_i1	40s ribosomal protein s24-like isoform x1	517	20	1.64898e-48	0.889
37991	c44184_g2_i1	40s ribosomal protein s26	421	20	4.18005e-55	0.881
62838	c49729_g1_i1	40s ribosomal protein s27-like	405	20	9.02688e-53	0.9435
15038	c32235_g1_i1	40s ribosomal protein s28	344	20	1.07406e-26	0.9445
16554	c33974_g1_i1	40s ribosomal protein s29-like	379	20	2.55429e-25	0.878
28216	c41637_g1_i1	40s ribosomal protein s3-like protein	1441	20	2.70497e-91	0.885
7934	c19197_g1_i1	40s ribosomal protein s7	681	20	8.75262e-130	0.844
19040	c36421_g1_i1	40s ribosomal protein s9-like	487	20	2.68449e-61	0.8535
15864	c33166_g1_i1	40s ribosomal protein sa	218	20	1.78131e-25	0.7295
12716	c28725_g1_i1	40s ribosomal protein sa-like	755	20	5.86846e-77	0.865
65033	c52537_g1_i1	43 kda receptor-associated protein of the synapse isoform x2	226	8	1.46211e-06	0.7025
63064	c50006_g1_i1	45 kda immunophilin fkbp45	208	3	5.20148e-07	0.7767
38472	c44268_g1_i1	4-aminobutyrate mitochondrial-like	1651	20	0	0.759
46567	c45354_g2_i2	4-coumarate: ligase	206	20	5.81757e-15	0.792
25330	c40457_g1_i1	4-coumarate:coenzyme a ligase 2	481	20	6.42523e-41	0.668
25331	c40457_g1_i2	4-coumarate:coenzyme a ligase 2	790	20	4.14177e-46	0.663
8635	c20911_g1_i1	4-hydroxybenzoate mitochondrial-like	552	20	4.7909e-62	0.7885
8636	c20911_g1_i2	4-hydroxybenzoate mitochondrial-like	427	20	1.5502e-35	0.7405
14033	c30910_g1_i1	4-hydroxybenzoate mitochondrial-like isoform x1	445	20	1.49309e-46	0.7805
36238	c43863_g1_i1	4-hydroxyphenylpyruvate dioxygenase	751	20	1.13321e-80	0.833
36239	c43863_g1_i2	4-hydroxyphenylpyruvate dioxygenase	954	20	3.70554e-107	0.802
36240	c43863_g1_i3	4-hydroxyphenylpyruvate dioxygenase	1292	20	4.09298e-145	0.816
3040	c7185_g1_i1	4-hydroxyphenylpyruvate dioxygenase-like	323	15	1.21622e-08	0.6413
4828	c11275_g1_i1	4-hydroxyphenylpyruvate dioxygenase-like	431	20	2.13022e-34	0.644
48623	c45577_g3_i1	4-trimethylaminobutyraldehyde dehydrogenase	274	20	1.91201e-17	0.7405
48632	c45577_g3_i2	4-trimethylaminobutyraldehyde dehydrogenase	345	20	5.94105e-32	0.79
66615	c54569_g1_i1	4-trimethylaminobutyraldehyde dehydrogenase	448	20	2.15634e-34	0.638
18831	c36239_g1_i1	5 -3 exoribonuclease 2	425	20	8.95838e-64	0.858
18832	c36239_g1_i2	5 -3 exoribonuclease 2	369	20	7.20865e-49	0.8155
20980	c37895_g1_i1	5 -3 exoribonuclease 2 homolog	251	20	1.60589e-13	0.6365
20981	c37895_g1_i2	5 -3 exoribonuclease 2 homolog	261	15	5.1708e-12	0.6387
33627	c43283_g3_i1	5 -3 exoribonuclease 2 homolog	291	20	3.26506e-35	0.9115
33631	c43283_g3_i2	5 -3 exoribonuclease 2 homolog	359	20	2.93172e-47	0.8965
45711	c45261_g1_i1	5 -3 exoribonuclease 2 homolog	602	20	8.03855e-69	0.6945
45714	c45261_g1_i2	5 -3 exoribonuclease 2 homolog	602	20	2.31788e-68	0.705
45724	c45261_g1_i3	5 -3 exoribonuclease 2 homolog	493	20	4.14722e-54	0.71
35947	c43804_g2_i6	5 -amp-activated protein kinase catalytic subunit alpha-2	517	20	1.10868e-50	0.8385
66125	c53947_g1_i1	5 -amp-activated protein kinase catalytic subunit alpha-2	201	20	1.70517e-26	0.919
43203	c44954_g2_i1	5 -amp-activated protein kinase catalytic subunit alpha-2-like	384	20	2.10685e-74	0.8815
43205	c44954_g2_i2	5 -amp-activated protein kinase catalytic subunit alpha-2-like	473	20	1.90627e-56	0.932
55763	c46275_g1_i6	5 -amp-activated protein kinase subunit gamma-2	1763	20	5.39709e-152	0.849
55765	c46275_g1_i8	5 -amp-activated protein kinase subunit gamma-2	329	20	2.89384e-44	0.886
63074	c50018_g1_i1	5 -nucleotidase	244	20	6.51663e-11	0.716
28139	c41616_g1_i1	5' nucleotidase, putative	227	3	4.22933e-07	0.76
25793	c40660_g1_i3	52k active chromatin boundary protein	335	20	1.02281e-25	0.8765
51819	c45902_g1_i3	52k active chromatin boundary protein	596	20	3.17252e-13	0.8335
51823	c45902_g1_i7	52k active chromatin boundary protein	626	20	2.72824e-17	0.908
51825	c45902_g1_i9	52k active chromatin boundary protein	805	20	7.13469e-22	0.919
58881	c46546_g1_i15	5-aminoimidazole-4-carboxamide ribonucleotide formyltransferase imp cyclohydrolase	370	20	2.10889e-52	0.84
54791	c46190_g2_i3	5-aminolevulinate erythroid- mitochondrial-like	864	20	1.06012e-32	0.715
54792	c46190_g2_i4	5-aminolevulinate erythroid- mitochondrial-like	965	20	1.71704e-31	0.715
54794	c46190_g4_i1	5-aminolevulinate erythroid- mitochondrial-like	202	20	1.64364e-28	0.845
54907	c46203_g1_i2	5-aminolevulinate erythroid- mitochondrial-like	1047	20	3.17797e-131	0.867
54910	c46203_g1_i5	5-aminolevulinate erythroid- mitochondrial-like	1232	20	4.07554e-131	0.867
54906	c46203_g1_i1	5-aminolevulinate mitochondrial	681	20	1.50706e-44	0.706
54908	c46203_g1_i3	5-aminolevulinate mitochondrial	487	20	5.25119e-23	0.664
54909	c46203_g1_i4	5-aminolevulinate mitochondrial	1044	20	3.97328e-95	0.8635
54914	c46203_g1_i8	5-aminolevulinate mitochondrial	678	20	1.45945e-44	0.706
54911	c46203_g1_i6	5-aminolevulinic acid synthase	908	20	1.85875e-70	0.7235
54913	c46203_g1_i7	5-aminolevulinic acid synthase	950	20	2.1044e-78	0.761
49325	c45653_g2_i1	5-oxoprolinase	340	20	1.35589e-37	0.8335
60893	c47186_g1_i1	5-oxoprolinase- partial	245	20	5.64904e-17	0.8505
17916	c35426_g1_i2	6- muscle type	398	20	1.1557e-44	0.7775
21374	c38184_g1_i1	60s acidic ribosomal protein p0	951	20	1.25539e-137	0.8415
10956	c25821_g1_i1	60s acidic ribosomal protein p1	507	20	9.16738e-25	0.8375
10768	c25475_g1_i1	60s acidic ribosomal protein p2	393	20	6.61461e-20	0.7825
60493	c46700_g1_i1	60s acidic ribosomal protein p2	379	20	1.76167e-21	0.754
66851	c54861_g1_i1	60s ribosomal export protein nmd3	324	20	6.5361e-19	0.662
24697	c40155_g1_i1	60s ribosomal protein l14-like	700	20	1.06584e-25	0.6615
14602	c31731_g1_i1	60s ribosomal protein l18a-like	617	20	5.0225e-74	0.7765
6817	c16460_g1_i1	60s ribosomal protein l21	362	20	2.62295e-31	0.7915
14675	c31825_g1_i1	60s ribosomal protein l21	256	20	2.97289e-22	0.813
9025	c21759_g1_i1	60s ribosomal protein l22	699	20	8.52462e-27	0.797
10962	c25830_g1_i1	60s ribosomal protein l23	517	20	2.43389e-86	0.9495
23513	c39470_g1_i1	60s ribosomal protein l23a	957	20	9.46147e-61	0.8695
66233	c54102_g1_i1	60s ribosomal protein l27	558	20	1.87847e-58	0.797
10985	c25852_g1_i1	60s ribosomal protein l27a-like	596	20	4.79286e-41	0.8515
10630	c25159_g1_i1	60s ribosomal protein l31	442	20	3.38219e-58	0.8615
45074	c45184_g2_i1	60s ribosomal protein l34-like	448	20	2.33683e-40	0.8005
50110	c45734_g3_i1	60s ribosomal protein l36	420	20	2.32837e-62	0.871
30845	c42525_g2_i1	60s ribosomal protein l37a-like	353	20	2.66927e-42	0.857
9027	c21764_g1_i1	60s ribosomal protein l38	359	20	2.86045e-33	0.94
24980	c40300_g1_i1	60s ribosomal protein l5	1550	20	7.47939e-132	0.8175
15211	c32417_g1_i1	60s ribosomal protein l6	815	20	6.23732e-66	0.7395
33155	c43171_g2_i1	60s ribosomal protein l7a	978	20	9.91354e-98	0.844
51059	c45824_g1_i1	60s ribosomal protein l8	948	20	2.62174e-132	0.9205
14928	c32102_g1_i1	60s ribosomal protein l9-like	654	20	2.70581e-122	0.8175
4137	c9725_g1_i1	60s ribosome subunit biogenesis protein nip7 homolog	241	20	7.8252e-52	0.8695
37421	c44094_g1_i1	60s ribosome subunit biogenesis protein nip7 homolog	324	20	1.21404e-16	0.6975
8510	c20650_g1_i1	6-phosphofructo-2-kinase fructose -	215	20	3.94587e-18	0.7495
8511	c20650_g1_i2	6-phosphofructo-2-kinase fructose -	216	20	1.69821e-18	0.752
66067	c53862_g1_i1	6-phosphofructo-2-kinase fructose- -biphosphatase 1	226	20	4.68535e-15	0.751
8621	c20880_g1_i2	6-phosphofructo-2-kinase fructose- -bisphosphatase short	360	20	1.21396e-42	0.7845
51448	c45861_g1_i4	6-phosphofructo-2-kinase fructose- -bisphosphatase-like	437	1	4.28329e-06	0.58
49294	c45650_g1_i1	6-phosphofructokinase	533	20	1.47699e-34	0.623
49299	c45650_g4_i1	6-phosphofructokinase-like isoform 1	506	20	1.09862e-67	0.872
49300	c45650_g4_i2	6-phosphofructokinase-like isoform 1	466	20	6.47494e-66	0.835
12671	c28645_g1_i1	6-phosphofructokinase-like isoform 2	324	20	9.24182e-42	0.8975
17915	c35426_g1_i1	6-phosphofructokinase-like isoform x1	488	20	1.26528e-47	0.746
26020	c40759_g1_i1	6-phosphofructokinase-like isoform x1	233	20	2.05509e-27	0.8925
26021	c40759_g1_i2	6-phosphofructokinase-like isoform x1	483	20	8.28611e-76	0.8525
52762	c45991_g1_i1	6-phosphogluconate decarboxylating	1616	20	0	0.8745
52763	c45991_g1_i2	6-phosphogluconate decarboxylating	1545	20	0	0.8755
52765	c45991_g1_i4	6-phosphogluconate decarboxylating	1397	20	0	0.891
52768	c45991_g1_i7	6-phosphogluconate decarboxylating	1707	20	0	0.8745
52770	c45991_g1_i9	6-phosphogluconate decarboxylating	1570	20	0	0.8745
52771	c45991_g1_i10	6-phosphogluconate decarboxylating	1100	20	2.01486e-172	0.863
52774	c45991_g1_i13	6-phosphogluconate decarboxylating	511	20	1.48034e-46	0.896
20097	c37319_g1_i1	6-phosphogluconolactonase-like	315	20	2.37881e-18	0.7425
36506	c43916_g1_i2	6-phosphogluconolactonase-like	328	20	2.65373e-24	0.7415
36508	c43916_g1_i4	6-phosphogluconolactonase-like	382	20	4.89468e-24	0.7415
36509	c43916_g1_i5	6-phosphogluconolactonase-like	353	20	3.49792e-24	0.7415
31922	c42840_g1_i1	70 kda heat shock partial	243	20	1.64417e-43	0.9495
31341	c42678_g1_i1	71 kda protein	357	20	1.01833e-12	0.548
66894	c54910_g1_i1	71 kda protein	282	20	2.37137e-15	0.5615
28463	c41728_g1_i2	78 kda glucose-regulated partial	651	20	4.60845e-93	0.9725
28464	c41728_g1_i3	78 kda glucose-regulated partial	247	20	2.06761e-30	0.9815
14362	c31414_g1_i1	85 88 kda calcium-independent phospholipase a2-like	203	20	8.51818e-14	0.758
14363	c31414_g1_i2	85 88 kda calcium-independent phospholipase a2-like	258	20	2.21653e-13	0.738
57706	c46443_g2_i1	a chain crystal spectroscopic and catalytic properties of cobalt copper nickel and mercury derivatives of the zinc endopeptidase a correlation of structure and proteolytic activity	908	20	1.11467e-139	0.659
57707	c46443_g2_i2	a chain crystal spectroscopic and catalytic properties of cobalt copper nickel and mercury derivatives of the zinc endopeptidase a correlation of structure and proteolytic activity	779	20	4.83492e-140	0.6605
61712	c48262_g1_i1	a chain crystal structure of hck complexed with a pyrrolo-pyrimidine inhibitor 1-	261	20	1.96412e-30	0.7675
56846	c46369_g2_i2	a chain hsp90 inhibitors and drugs from fragment and virtual screening	353	20	6.53893e-63	0.93
42276	c44833_g1_i1	a chain human cyclophilin d complexed with a fragment	867	20	9.02945e-08	0.5345
42281	c44833_g1_i3	a chain human cyclophilin d complexed with a fragment	1179	20	1.5177e-09	0.498
42286	c44833_g1_i4	a chain human cyclophilin d complexed with a fragment	994	20	1.15704e-09	0.4975
42287	c44833_g1_i5	a chain human cyclophilin d complexed with a fragment	963	20	1.03612e-09	0.4975
42288	c44833_g1_i6	a chain human cyclophilin d complexed with a fragment	686	18	8.32956e-08	0.5744
42290	c44833_g1_i7	a chain human cyclophilin d complexed with a fragment	1217	20	2.00515e-09	0.4975
65312	c52893_g1_i1	a chain human gar tfase complex structure with polyglutamated 10- - -dideazaacyclic- - tetrahydrofolic acid	240	20	4.9695e-22	0.75
48971	c45613_g2_i1	a chain structures of actin-bound wh2 domains of spire and the implication for filament nucleation	1977	20	0	0.9605
56843	c46369_g1_i1	a chain tricyclic series of hsp90 inhibitors	373	20	7.07967e-53	0.8805
56844	c46369_g2_i1	a chain tricyclic series of hsp90 inhibitors	381	20	1.21533e-56	0.9365
56845	c46369_g1_i2	a chain tricyclic series of hsp90 inhibitors	273	20	5.5533e-26	0.841
5694	c13382_g1_i1	a disintegrin and metalloproteinase with thrombospondin motifs 12	212	20	2.73576e-12	0.769
25074	c40343_g1_i1	a disintegrin and metalloproteinase with thrombospondin motifs 14	1163	20	2.97599e-111	0.6555
25076	c40343_g1_i3	a disintegrin and metalloproteinase with thrombospondin motifs 14	1268	20	6.65919e-119	0.6505
25077	c40343_g1_i4	a disintegrin and metalloproteinase with thrombospondin motifs 14	762	20	5.25979e-47	0.5945
25078	c40343_g1_i5	a disintegrin and metalloproteinase with thrombospondin motifs 14	1139	20	1.78067e-110	0.6555
29117	c41960_g1_i2	a disintegrin and metalloproteinase with thrombospondin motifs 3	1024	20	6.54233e-18	0.5055
18934	c36330_g1_i1	a disintegrin and metalloproteinase with thrombospondin motifs 3-like	267	15	3.61871e-12	0.564
18935	c36330_g1_i2	a disintegrin and metalloproteinase with thrombospondin motifs 3-like	396	20	1.01327e-19	0.4935
18936	c36330_g1_i3	a disintegrin and metalloproteinase with thrombospondin motifs 3-like	449	20	7.75557e-23	0.504
25075	c40343_g1_i2	a disintegrin and metalloproteinase with thrombospondin motifs 3-like	291	20	4.52725e-29	0.7605
25079	c40343_g1_i6	a disintegrin and metalloproteinase with thrombospondin motifs 3-like	717	20	4.63164e-71	0.6755
25080	c40343_g1_i7	a disintegrin and metalloproteinase with thrombospondin motifs 3-like	634	20	1.93695e-70	0.68
29118	c41960_g1_i3	a disintegrin and metalloproteinase with thrombospondin motifs 3-like	1092	20	8.83523e-18	0.506
733	c1777_g1_i1	a disintegrin and metalloproteinase with thrombospondin motifs 7-like	281	20	1.57173e-11	0.5515
780	c1894_g1_i1	a disintegrin and metalloproteinase with thrombospondin motifs 7-like	237	20	1.6053e-25	0.6635
5637	c13263_g1_i1	a disintegrin and metalloproteinase with thrombospondin motifs 7-like	216	6	1.98838e-11	0.5967
66882	c54896_g1_i1	a g-specific adenine dna glycosylase	215	20	1.12135e-24	0.798
29031	c41931_g1_i2	a subunit of nadh dehydrogenase	344	20	6.29885e-09	0.5725
27998	c41563_g1_i2	a2 collagen	466	18	4.40173e-07	0.6483
51928	c45911_g2_i2	aaa atpase domain-containing protein	336	20	1.52277e-24	0.7805
51929	c45911_g2_i3	aaa atpase domain-containing protein	291	20	6.78656e-25	0.7575
19475	c36776_g1_i1	aael001060- partial	226	10	1.41464e-06	0.606
24759	c40189_g1_i2	aael001527- partial	235	20	9.30974e-09	0.622
48826	c45599_g2_i1	aael002829- partial	462	20	5.64528e-67	0.851
17145	c34651_g1_i1	aael005285- partial	221	20	2.05318e-16	0.6225
60807	c47082_g1_i1	aael005685- partial	257	20	1.39604e-19	0.8025
6194	c14707_g1_i1	aael006433- partial	274	9	2.4452e-07	0.5978
6778	c16357_g1_i1	aael006472- partial	336	9	1.20926e-08	0.7011
63988	c51187_g1_i1	aael006472- partial	380	20	2.20637e-28	0.6675
65539	c53171_g1_i1	aael006472- partial	303	20	1.39821e-27	0.8825
51174	c45834_g1_i2	aael007804- partial	746	20	8.72263e-63	0.6405
51177	c45834_g1_i5	aael007804- partial	528	20	2.97711e-51	0.609
51178	c45834_g1_i6	aael007804- partial	795	20	4.95546e-64	0.636
51179	c45834_g1_i7	aael007804- partial	1096	20	8.63229e-52	0.646
51180	c45834_g1_i8	aael007804- partial	646	20	1.1015e-53	0.62
54900	c46201_g1_i11	aael007804- partial	224	20	2.34659e-12	0.7735
21355	c38172_g1_i1	aael010198- partial	349	20	2.87661e-40	0.808
21356	c38172_g1_i2	aael010198- partial	708	20	1.50665e-38	0.808
21357	c38172_g1_i3	aael010198- partial	262	20	4.25446e-33	0.811
27574	c41403_g1_i3	aael010215- partial	1176	20	1.87592e-89	0.6945
27576	c41403_g1_i5	aael010215- partial	1030	20	9.00281e-77	0.6945
24518	c40059_g1_i2	aael010828- partial	319	20	7.26224e-18	0.776
45288	c45213_g3_i1	aael010828- partial	234	20	3.00779e-10	0.654
24380	c39992_g1_i2	aael012165- partial	312	20	7.1729e-35	0.7845
2596	c6179_g1_i1	aael012182- partial	302	13	5.34375e-08	0.7715
67199	c55311_g1_i1	aael013398- partial	379	20	5.5542e-40	0.761
37824	c44159_g1_i1	aael014436- partial	408	20	1.79115e-10	0.586
37825	c44159_g1_i2	aael014436- partial	445	19	1.38938e-10	0.6089
37829	c44159_g1_i3	aael014436- partial	443	20	2.08217e-10	0.583
45580	c45242_g3_i1	aael014436- partial	695	20	7.60366e-18	0.6205
60448	c46683_g1_i6	aael014436- partial	459	20	2.05299e-09	0.561
60450	c46683_g1_i8	aael014436- partial	392	20	7.60048e-09	0.5885
64397	c51686_g1_i1	abc subfamily abcb mdr	430	20	1.07107e-35	0.6375
47540	c45465_g1_i2	abc subfamily abcg	224	20	5.71704e-16	0.769
47541	c45465_g1_i3	abc subfamily abcg	439	20	4.61431e-65	0.8245
47542	c45465_g1_i4	abc subfamily abcg	326	20	2.0983e-45	0.8465
47544	c45465_g1_i5	abc subfamily abcg	266	20	1.96602e-16	0.7765
47546	c45465_g1_i6	abc subfamily abcg	431	20	4.77693e-64	0.835
48012	c45512_g1_i1	abc subfamily abcg	2273	20	0	0.683
26598	c40999_g1_i2	abc subfamily abch	344	20	1.81632e-12	0.7275
26599	c40999_g1_i3	abc subfamily abch	420	20	6.07588e-21	0.633
5794	c13638_g1_i1	abc transporter	343	20	2.0358e-45	0.8155
5795	c13638_g1_i2	abc transporter	215	20	6.64105e-21	0.726
8009	c19374_g1_i1	abc transporter	248	20	1.59977e-14	0.6725
14239	c31214_g1_i1	abc transporter	241	20	1.42162e-14	0.7465
14240	c31214_g1_i2	abc transporter	371	20	1.94376e-32	0.7565
14241	c31214_g1_i3	abc transporter	413	20	1.88174e-34	0.7305
14242	c31214_g1_i4	abc transporter	332	20	5.47922e-28	0.7345
19465	c36768_g1_i1	abc transporter	427	20	4.57263e-16	0.9075
21072	c37963_g1_i1	abc transporter	222	20	1.3466e-21	0.842
32717	c43060_g1_i1	abc transporter	537	20	1.44599e-43	0.7575
16022	c33352_g1_i1	abc transporter a family member 4	656	10	7.2845e-11	0.511
15591	c32877_g1_i2	abc transporter g family member 20	326	20	2.60394e-24	0.7835
5393	c12620_g1_i1	abc transporter g family member 20-like	289	20	6.22927e-14	0.7465
15592	c32877_g1_i3	abc transporter g family member 20-like	252	20	2.28692e-26	0.797
32718	c43060_g1_i2	abc transporter g family member 20-like isoform 1	663	20	9.17361e-36	0.5505
32720	c43060_g1_i4	abc transporter g family member 20-like isoform 1	806	20	1.02224e-50	0.5435
15359	c32592_g1_i1	abc-type transport system atp-binding protein	259	20	1.26308e-16	0.7695
9368	c22529_g1_i1	abhydrolase domain-containing protein 14a	267	20	2.69448e-12	0.626
47879	c45499_g1_i1	abhydrolase domain-containing protein 16a	1364	20	3.44611e-76	0.681
47880	c45499_g1_i2	abhydrolase domain-containing protein 16a	468	20	1.74876e-63	0.762
47881	c45499_g1_i3	abhydrolase domain-containing protein 16a	1060	20	1.5691e-77	0.681
47882	c45499_g1_i4	abhydrolase domain-containing protein 16a	783	20	4.95553e-79	0.681
47886	c45499_g1_i8	abhydrolase domain-containing protein 16a	1074	20	1.842e-77	0.681
47887	c45499_g1_i9	abhydrolase domain-containing protein 16a	664	20	3.99471e-80	0.6935
47890	c45499_g1_i12	abhydrolase domain-containing protein 16a	670	20	4.38032e-77	0.699
38711	c44311_g1_i1	abhydrolase domain-containing protein 16a-like	524	20	6.79016e-39	0.599
38712	c44311_g1_i2	abhydrolase domain-containing protein 16a-like	475	20	4.32338e-32	0.5915
47884	c45499_g1_i6	abhydrolase domain-containing protein 16a-like	880	20	2.13226e-78	0.681
47885	c45499_g1_i7	abhydrolase domain-containing protein 16a-like	338	20	6.79296e-45	0.795
47888	c45499_g1_i10	abhydrolase domain-containing protein 16a-like	623	20	7.98569e-74	0.7065
47889	c45499_g1_i11	abhydrolase domain-containing protein 16a-like	861	20	1.7338e-78	0.681
47892	c45499_g1_i14	abhydrolase domain-containing protein 16a-like	891	20	2.44577e-78	0.681
54258	c46136_g4_i1	abhydrolase domain-containing protein 3-like	383	20	7.31634e-45	0.7405
54259	c46136_g4_i2	abhydrolase domain-containing protein 3-like	1368	20	2.01354e-95	0.709
54260	c46136_g4_i3	abhydrolase domain-containing protein 3-like	1057	20	7.48958e-72	0.5845
54261	c46136_g4_i4	abhydrolase domain-containing protein 3-like	1405	20	2.55714e-95	0.709
54262	c46136_g4_i5	abhydrolase domain-containing protein 3-like	1462	20	7.6646e-96	0.709
54263	c46136_g4_i6	abhydrolase domain-containing protein 3-like	1387	20	2.50169e-95	0.709
17433	c34959_g1_i1	abhydrolase domain-containing protein 4	380	20	2.77503e-31	0.779
6867	c16570_g1_i1	abhydrolase domain-containing protein 4-like	345	20	2.88568e-12	0.647
6868	c16570_g1_i2	abhydrolase domain-containing protein 4-like isoform 2	236	3	4.08987e-06	0.7333
7600	c18536_g1_i1	abhydrolase domain-containing protein 4-like isoform x2	253	20	5.13679e-17	0.777
15118	c32335_g1_i1	abl interactor 2	405	20	5.08403e-54	0.9045
15119	c32335_g1_i2	abl interactor 2	203	20	1.39151e-23	0.9305
66665	c54640_g1_i1	abl interactor 2	236	20	2.61705e-26	0.951
2235	c5261_g1_i1	ac transposable element-derived protein 4	202	20	1.19617e-15	0.6595
9235	c22225_g1_i1	ac transposable element-derived protein 4	299	9	1.6123e-12	0.5756
15549	c32807_g1_i1	ac transposable element-derived protein 4	227	20	3.48436e-11	0.573
27279	c41291_g1_i1	ac transposable element-derived protein 4	213	20	1.65026e-18	0.8035
34751	c43555_g1_i5	ac transposable element-derived protein 4	292	20	2.87513e-11	0.5645
34755	c43555_g1_i9	ac transposable element-derived protein 4	342	20	5.53144e-09	0.561
46277	c45324_g1_i4	ac transposable element-derived protein 4	231	8	1.54395e-09	0.7288
46282	c45324_g1_i9	ac transposable element-derived protein 4	288	13	2.62261e-09	0.5915
47698	c45480_g1_i8	ac transposable element-derived protein 4	230	3	2.49215e-06	0.6067
49308	c45651_g2_i1	ac transposable element-derived protein 4	330	20	6.70699e-30	0.6505
49310	c45651_g2_i3	ac transposable element-derived protein 4	376	20	9.11132e-32	0.624
49313	c45651_g2_i4	ac transposable element-derived protein 4	331	20	5.15902e-30	0.6515
49314	c45651_g2_i5	ac transposable element-derived protein 4	340	20	4.57683e-26	0.622
49316	c45651_g2_i6	ac transposable element-derived protein 4	295	20	2.84483e-23	0.632
53987	c46111_g2_i2	ac transposable element-derived protein 4	681	5	4.03854e-09	0.548
53993	c46111_g2_i3	ac transposable element-derived protein 4	746	5	5.77162e-09	0.548
59605	c46606_g2_i1	ac transposable element-derived protein 4	246	20	2.19315e-23	0.754
59609	c46606_g1_i3	ac transposable element-derived protein 4	683	3	3.2384e-07	0.5733
22015	c38637_g1_i1	ac1147-like partial	2024	20	4.52595e-58	0.7705
30671	c42470_g1_i5	accessory gland protein	275	20	1.46241e-24	0.8255
31181	c42634_g1_i2	accessory gland protein	495	20	9.13185e-88	0.915
31182	c42634_g1_i3	accessory gland protein	564	20	8.94032e-110	0.916
50687	c45787_g1_i2	accessory gland protein	356	8	1.64426e-06	0.6475
57615	c46434_g3_i2	accessory gland protein	221	20	9.24792e-20	0.763
30367	c42377_g1_i1	acetolactate synthase-like	662	20	1.19548e-88	0.8095
30371	c42377_g1_i2	acetolactate synthase-like	444	20	1.02118e-54	0.7675
58386	c46503_g2_i2	acetolactate synthase-like	395	20	4.97797e-43	0.8295
58388	c46503_g2_i4	acetolactate synthase-like	894	20	1.92351e-135	0.83
58392	c46503_g2_i8	acetolactate synthase-like	1016	20	6.64678e-125	0.811
58393	c46503_g2_i9	acetolactate synthase-like	866	20	1.01696e-134	0.8365
58394	c46503_g2_i10	acetolactate synthase-like	1064	20	3.52422e-135	0.816
28778	c41853_g1_i1	acetolactate synthase-like protein	410	20	5.77153e-40	0.7705
28779	c41853_g1_i2	acetolactate synthase-like protein	406	20	6.70294e-17	0.7165
28780	c41853_g1_i3	acetolactate synthase-like protein	520	20	2.06226e-39	0.7705
58385	c46503_g2_i1	acetolactate synthase-like protein	426	20	4.23009e-26	0.722
1852	c4316_g1_i1	acetyl- carboxylase 1-like isoform x5	323	20	1.03784e-26	0.7765
1853	c4316_g1_i2	acetyl- carboxylase 1-like isoform x5	228	20	7.28907e-13	0.7745
5121	c11926_g1_i2	acetyl- carboxylase 1-like isoform x5	257	20	2.43607e-24	0.8565
5120	c11926_g1_i1	acetyl- carboxylase alpha	207	20	7.8942e-15	0.775
10380	c24648_g1_i1	acetyl- carboxylase-like	223	20	6.63867e-13	0.88
62535	c49308_g1_i1	acetyl- carboxylase-like isoform x2	301	20	5.10716e-38	0.94
31266	c42656_g1_i3	acetyl- mitochondrial	745	20	3.92282e-80	0.8045
31268	c42656_g1_i5	acetyl- mitochondrial	607	20	1.65416e-68	0.8155
46096	c45301_g1_i1	acetyl- mitochondrial	334	20	7.53144e-30	0.868
31264	c42656_g1_i1	acetyl- mitochondrial-like	739	20	3.0303e-73	0.819
31265	c42656_g1_i2	acetyl- mitochondrial-like	329	20	7.13784e-28	0.778
31267	c42656_g1_i4	acetyl- mitochondrial-like	310	20	4.93128e-26	0.7595
31269	c42656_g1_i6	acetyl- mitochondrial-like	540	20	1.14813e-47	0.7775
67098	c55178_g1_i1	acetyl- synthetase	250	20	2.36138e-15	0.697
62801	c49681_g1_i1	acetylcholine receptor subunit alpha-type deg-3	323	1	2.25789e-06	0.56
5367	c12554_g1_i1	acetyl-coa carboxylase	366	20	4.68994e-35	0.861
65397	c53000_g1_i1	acetyl-coa carboxylase	265	5	3.6786e-08	0.75
3249	c7590_g1_i1	acetyl-coenzyme a cytoplasmic-like	366	20	1.42066e-42	0.858
4981	c11616_g1_i1	acetyl-coenzyme a synthetase 2- mitochondrial	201	20	8.12942e-25	0.7315
35139	c43641_g2_i2	acetyl-coenzyme a synthetase 2- mitochondrial	313	20	8.01776e-25	0.751
35137	c43641_g2_i1	acetyl-coenzyme a synthetase 2- mitochondrial-like	395	20	8.37659e-54	0.788
61243	c47632_g1_i1	acetyl-coenzyme a synthetase 2- mitochondrial-like	235	8	9.47711e-13	0.6663
1243	c3086_g1_i1	acetyl-coenzyme a transporter 1-like	251	20	2.13725e-23	0.7455
13160	c29539_g1_i2	acetyl-coenzyme a transporter 1-like	503	6	1.83071e-10	0.725
42966	c44918_g1_i1	acetylglucosaminyl-transferase	203	20	2.84575e-29	0.987
42968	c44918_g2_i1	acetylglucosaminyl-transferase	343	20	1.76177e-54	0.984
4191	c9829_g1_i1	acetyltransferase	366	20	1.51221e-46	0.9815
36926	c43997_g1_i2	achain 3ank: a designed ankyrin repeat protein with three identical consensus repeats	213	3	4.08679e-06	0.58
30415	c42390_g1_i3	achain crystal structure of engineered northeast structural genomics consortium target	202	20	2.42821e-15	0.697
36925	c43997_g1_i1	achain crystal structure of engineered northeast structural genomics consortium target	413	20	1.90132e-21	0.5545
38523	c44277_g1_i1	achain crystal structure of engineered northeast structural genomics consortium target	825	20	4.09737e-32	0.5885
40962	c44647_g2_i2	achain crystal structure of engineered northeast structural genomics consortium target	2086	20	3.55228e-24	0.586
45639	c45251_g2_i1	achain crystal structure of engineered northeast structural genomics consortium target	1071	20	5.17775e-19	0.5835
57632	c46436_g1_i1	achain crystal structure of engineered northeast structural genomics consortium target	237	20	2.00067e-10	0.5765
17027	c34540_g1_i2	achain crystal structure of pdk1 in complex with a pyrazoloquinazoline inhibitor	519	20	9.96515e-69	0.763
10841	c25596_g1_i1	achain crystal structure of the second sh3 domain of itsn1 bound with a synthetic peptide	202	4	2.18628e-07	0.6975
43895	c45041_g1_i1	achain esterase domain of the zfl2-1 orf1 protein from the zebrafish zfl2-1 retrotransposon	282	4	3.64867e-08	0.51
51402	c45857_g2_i4	achain esterase domain of the zfl2-1 orf1 protein from the zebrafish zfl2-1 retrotransposon	354	6	2.61518e-08	0.6117
51403	c45857_g2_i5	achain esterase domain of the zfl2-1 orf1 protein from the zebrafish zfl2-1 retrotransposon	326	6	2.13001e-08	0.6117
51406	c45857_g2_i8	achain esterase domain of the zfl2-1 orf1 protein from the zebrafish zfl2-1 retrotransposon	331	6	2.23268e-08	0.6117
51408	c45857_g2_i10	achain esterase domain of the zfl2-1 orf1 protein from the zebrafish zfl2-1 retrotransposon	310	6	1.88637e-08	0.6117
46106	c45302_g2_i1	achain solution structure of par-3 pdz3	377	6	5.06332e-08	0.7817
49906	c45714_g1_i11	achain solution structure of rna binding domain 2 in rna-binding protein 14	214	1	4.20118e-06	0.74
43131	c44946_g1_i5	achain solution structure of the second fn3 domain of eph receptor a8 protein	507	1	1.8139e-06	0.51
52574	c45970_g2_i6	achain structural determinants for improved thermal stability of designed ankyrin repeat proteins with a redesigned c- capping	1698	20	3.38137e-12	0.5765
53924	c46102_g1_i11	achain structure of n-terminal kinase domain of rsk2 with afzelin	810	20	7.73783e-83	0.9455
31276	c42660_g1_i1	achain structure of the core asap complex	415	6	5.37138e-06	0.8
31585	c42745_g1_i3	achain structures and chemical shift assignments for the add domain of the atrx protein	307	20	3.02293e-07	0.586
21888	c38546_g1_i1	acid ceramidase	372	20	2.69706e-23	0.668
21889	c38546_g1_i2	acid ceramidase	412	20	9.17352e-19	0.6
21890	c38546_g1_i3	acid ceramidase	456	20	3.36446e-31	0.6485
23672	c39575_g1_i1	acid ceramidase	311	20	7.28525e-24	0.7325
23673	c39575_g1_i2	acid ceramidase	218	20	1.11399e-12	0.775
32243	c42922_g1_i3	acid ceramidase	253	19	7.37638e-09	0.7505
37535	c44113_g2_i1	acid ceramidase	231	20	3.09634e-15	0.736
37536	c44113_g2_i2	acid ceramidase	496	20	9.34975e-21	0.7535
37537	c44113_g2_i3	acid ceramidase	439	20	1.47396e-08	0.539
46477	c45345_g2_i1	acid ceramidase	279	20	1.06521e-20	0.779
46480	c45345_g2_i2	acid ceramidase	223	20	4.60649e-08	0.7895
32241	c42922_g1_i1	acid ceramidase-like	625	20	6.74355e-32	0.7305
32242	c42922_g1_i2	acid ceramidase-like	588	20	9.10084e-32	0.73
32244	c42922_g1_i4	acid ceramidase-like	625	20	1.07072e-31	0.73
50757	c45794_g1_i1	acid sphingomyelinase	254	20	2.0309e-21	0.682
57209	c46399_g3_i2	acid sphingomyelinase-like phosphodiesterase 3b	625	20	5.82724e-13	0.4985
57210	c46399_g3_i3	acid sphingomyelinase-like phosphodiesterase 3b	237	20	1.08236e-11	0.639
57211	c46399_g3_i4	acid sphingomyelinase-like phosphodiesterase 3b	2144	20	1.3263e-58	0.572
57212	c46399_g3_i5	acid sphingomyelinase-like phosphodiesterase 3b	310	20	6.33173e-12	0.6055
57215	c46399_g3_i8	acid sphingomyelinase-like phosphodiesterase 3b	1321	20	2.32629e-47	0.6165
57218	c46399_g3_i11	acid sphingomyelinase-like phosphodiesterase 3b	583	20	6.91474e-22	0.536
57219	c46399_g3_i12	acid sphingomyelinase-like phosphodiesterase 3b	1916	20	7.52636e-58	0.569
57220	c46399_g3_i13	acid sphingomyelinase-like phosphodiesterase 3b	389	20	2.15903e-12	0.58
57208	c46399_g3_i1	acid sphingomyelinase-like phosphodiesterase 3b-like	283	20	9.0678e-24	0.681
57213	c46399_g3_i6	acid sphingomyelinase-like phosphodiesterase 3b-like	269	3	4.79716e-06	0.5267
64692	c52073_g1_i1	acid sphingomyelinase-like phosphodiesterase 3b-like	203	20	1.34473e-10	0.6155
30037	c42271_g1_i2	acidic leucine-rich nuclear phosphoprotein 32 family member a-like	328	20	5.99629e-24	0.7725
30039	c42271_g1_i4	acidic leucine-rich nuclear phosphoprotein 32 family member a-like	466	20	5.63363e-38	0.829
61369	c47797_g1_i1	acidic mammalian chitinase	213	3	2.31606e-06	0.6267
3710	c8682_g1_i1	acid-sensing ion channel 3	225	20	5.70156e-11	0.72
54077	c46118_g2_i2	acireductone dioxygenase	618	20	3.23862e-75	0.8245
54076	c46118_g2_i1	acireductone dioxygenase 4	530	20	2.10759e-42	0.8195
36859	c43985_g2_i3	aconitate hydratase 1	276	20	5.98477e-12	0.805
11050	c25950_g1_i1	aconitate mitochondrial	332	20	2.04017e-46	0.9225
14954	c32124_g1_i1	aconitate mitochondrial	498	20	9.32967e-93	0.871
1253	c3102_g1_i1	aconitate mitochondrial-like	367	20	4.3774e-34	0.9235
3256	c7606_g1_i1	aconitate mitochondrial-like	265	20	6.06112e-44	0.9215
11051	c25950_g1_i2	aconitate mitochondrial-like	448	20	9.90725e-74	0.946
60595	c46818_g1_i1	aconitate mitochondrial-like	361	20	2.00853e-61	0.8955
42103	c44805_g1_i1	acrosomal process isoform	266	20	4.775e-29	0.741
42106	c44805_g1_i2	acrosomal process isoform	241	20	2.12801e-18	0.7565
1718	c4082_g1_i1	Actin	214	4	4.95961e-08	0.655
2793	c6641_g1_i1	actin	244	20	4.68848e-24	0.8935
18945	c36336_g1_i1	actin	820	20	0	0.994
27802	c41489_g1_i1	actin	659	20	2.68912e-78	0.907
27805	c41489_g1_i2	actin	759	20	8.71741e-90	0.8105
27806	c41489_g1_i3	actin	608	20	3.27409e-68	0.906
27807	c41489_g1_i4	actin	218	20	3.40783e-15	0.824
31363	c42686_g1_i1	actin	394	20	6.56596e-64	0.961
58253	c46491_g1_i2	actin	312	20	1.21647e-27	0.975
991	c2453_g1_i1	actin binding	479	20	1.58961e-31	0.6525
992	c2453_g1_i2	actin binding	340	20	1.87617e-27	0.6765
50472	c45768_g1_i4	actin binding protein	271	19	1.79858e-12	0.5995
24275	c39934_g1_i3	actin e2	353	20	8.68992e-53	0.9605
63449	c50483_g1_i1	actin family protein	244	20	2.66e-19	0.625
58255	c46491_g1_i4	actin- muscle-specific	318	20	1.2253e-45	0.9025
19211	c36552_g1_i1	actin-binding lim protein 1-like	219	20	7.72756e-12	0.694
64210	c51451_g1_i1	actin-binding lim protein 1-like	255	20	4.7292e-32	0.8575
67105	c55188_g1_i1	actin-binding lim protein 1-like	237	20	1.68862e-12	0.7505
46334	c45330_g2_i1	actin-binding lim protein 3 isoform x2	366	20	2.79015e-54	0.721
48942	c45609_g3_i1	actin-binding protein ipp	620	20	3.99991e-26	0.4245
21071	c37962_g1_i1	actin-depolymerizing factor 1	1293	20	1.0542e-60	0.796
39980	c44498_g1_i4	actin-depolymerizing factor 1	547	20	1.19296e-47	0.7715
39981	c44498_g1_i5	actin-depolymerizing factor 1	662	20	4.38474e-47	0.7715
39982	c44498_g1_i6	actin-depolymerizing factor 1	558	20	1.3691e-47	0.7715
27558	c41396_g1_i2	actin-interacting protein 1	366	20	1.14812e-43	0.794
27559	c41396_g1_i3	actin-interacting protein 1	632	20	5.67281e-96	0.819
27561	c41396_g1_i5	actin-interacting protein 1	471	20	2.97484e-62	0.811
27562	c41396_g1_i6	actin-interacting protein 1	514	20	3.03424e-70	0.8115
32577	c43018_g1_i3	actin-interacting protein 1-like	304	20	8.99734e-25	0.8645
41447	c44715_g1_i3	actin-interacting protein 1-like	786	20	1.90128e-51	0.7615
41449	c44715_g2_i2	actin-interacting protein 1-like	210	20	7.22233e-10	0.7675
9544	c22903_g1_i1	actin-like protein 6a-like	201	20	2.63149e-19	0.73
64918	c52385_g1_i1	actin-like protein 6a-like isoform x1	239	20	2.81289e-29	0.885
62073	c48712_g1_i1	actin-like protein 87c-like	292	20	1.27916e-35	0.9395
10137	c24164_g1_i1	actin-related protein 10	278	20	8.21788e-12	0.568
11800	c27182_g1_i1	actin-related protein 10	534	20	6.2516e-53	0.703
17706	c35243_g1_i1	actin-related protein 10	346	20	1.72449e-25	0.664
7940	c19212_g1_i1	actin-related protein 2	229	20	1.94998e-21	0.961
51799	c45901_g1_i2	actin-related protein 2 3 complex subunit 1a	391	20	6.88717e-48	0.79
51801	c45901_g2_i2	actin-related protein 2 3 complex subunit 1a	638	20	2.36696e-50	0.757
51802	c45901_g2_i3	actin-related protein 2 3 complex subunit 1a	450	20	1.69135e-36	0.7585
51800	c45901_g2_i1	actin-related protein 2 3 complex subunit 1a-like	784	20	7.36779e-54	0.663
51804	c45901_g2_i4	actin-related protein 2 3 complex subunit 1a-like	614	20	2.54191e-58	0.7195
13619	c30300_g1_i1	actin-related protein 2 3 complex subunit 2	418	20	1.1861e-46	0.9165
25780	c40655_g1_i1	actin-related protein 2 3 complex subunit 3	288	20	7.60055e-39	0.808
25781	c40655_g1_i2	actin-related protein 2 3 complex subunit 3-like	241	20	2.63333e-28	0.821
25996	c40749_g1_i1	actin-related protein 2 3 complex subunit 3-like	246	16	1.66465e-07	0.6463
16766	c34217_g1_i1	actin-related protein 2 3 complex subunit 5-like	320	20	2.63335e-12	0.726
24268	c39930_g1_i1	actin-related protein 2 3 subunit isoform c	383	20	4.01809e-21	0.813
24269	c39930_g1_i2	actin-related protein 2 3 subunit isoform c	241	20	7.97583e-22	0.813
13735	c30485_g1_i1	actin-related protein 2 isoform x3	355	20	4.43395e-50	0.8905
28550	c41766_g1_i2	actin-related protein 2 isoform x3	321	20	8.10296e-37	0.8755
7941	c19212_g1_i2	actin-related protein 2-like isoform 1	365	20	2.18995e-54	0.9195
63272	c50268_g1_i1	actin-related protein 3	260	20	4.39035e-26	0.891
61484	c47952_g1_i1	actin-related protein 3-like	275	20	4.8277e-33	0.9335
5506	c12907_g1_i1	actin-related protein 5-like	248	20	1.73637e-28	0.8065
60745	c47012_g1_i1	actin-related protein 6	280	20	1.31221e-37	0.85
66177	c54022_g1_i1	actin-related protein 6	226	20	8.09805e-18	0.7775
3439	c7986_g1_i1	actin-related protein 8-like	310	17	8.73873e-12	0.6682
3440	c7986_g1_i2	actin-related protein 8-like	259	20	1.91772e-18	0.685
11821	c27209_g1_i1	actin-related protein 8-like	327	20	9.4267e-35	0.777
47631	c45474_g1_i5	actin-related protein 8-like	892	20	2.67166e-69	0.6545
47634	c45474_g1_i8	actin-related protein 8-like	660	20	2.80672e-28	0.5845
47635	c45474_g1_i9	actin-related protein 8-like	933	20	2.14656e-69	0.6565
21172	c38042_g1_i1	activating signal cointegrator 1	303	20	7.30804e-33	0.806
2644	c6267_g1_i1	activating signal cointegrator 1 complex subunit 1	216	20	8.57558e-10	0.659
3300	c7693_g1_i1	activating signal cointegrator 1 complex subunit 2	350	20	1.52827e-18	0.6125
7310	c17824_g1_i1	activating signal cointegrator 1 complex subunit 3	294	20	2.59863e-30	0.799
13300	c29762_g1_i1	activating signal cointegrator 1 complex subunit 3	291	20	4.23868e-19	0.8255
14089	c30980_g1_i1	activating signal cointegrator 1 complex subunit 3	212	20	6.40676e-27	0.818
14090	c30980_g1_i2	activating signal cointegrator 1 complex subunit 3	205	20	2.34205e-15	0.7295
19060	c36435_g1_i1	activating signal cointegrator 1 complex subunit 3	229	20	6.76962e-15	0.692
48040	c45515_g1_i1	activating signal cointegrator 1 complex subunit 3	214	20	6.82283e-14	0.7295
48041	c45515_g1_i2	activating signal cointegrator 1 complex subunit 3	218	20	7.56328e-09	0.7365
48042	c45515_g1_i3	activating signal cointegrator 1 complex subunit 3	211	20	1.48011e-11	0.7655
51320	c45849_g2_i1	activating signal cointegrator 1 complex subunit 3	576	20	4.30792e-46	0.671
51322	c45849_g2_i2	activating signal cointegrator 1 complex subunit 3	300	20	8.01261e-14	0.7855
26395	c40902_g1_i1	activating signal cointegrator 1 complex subunit 3-like	332	20	3.30276e-52	0.863
26397	c40902_g1_i2	activating signal cointegrator 1 complex subunit 3-like	313	20	9.18243e-52	0.9195
62774	c49643_g1_i1	activating signal cointegrator 1 complex subunit 3-like	244	20	2.26387e-25	0.889
37430	c44095_g1_i1	activating transcription factor 7-interacting protein 2	246	1	7.88626e-07	0.81
54276	c46138_g4_i2	activating transcription factor 7-interacting protein 2	250	3	1.16335e-06	0.8
54279	c46138_g4_i5	activating transcription factor 7-interacting protein 2	253	1	8.15567e-06	0.8
42517	c44860_g1_i1	activating transcription factor of chaperone-like	1872	20	8.58533e-33	0.736
51886	c45908_g1_i3	active breakpoint cluster region-related	438	2	3.44811e-06	0.715
51887	c45908_g1_i4	active breakpoint cluster region-related	492	1	5.75888e-06	0.73
66256	c54128_g1_i1	active breakpoint cluster region-related	479	20	3.34925e-34	0.664
36903	c43993_g1_i1	acyl- -binding domain-containing protein 6	407	20	5.1407e-30	0.6405
36904	c43993_g1_i2	acyl- -binding domain-containing protein 6	442	20	3.36638e-38	0.6195
36905	c43993_g1_i3	acyl- -binding domain-containing protein 6	328	20	4.19464e-17	0.591
36907	c43993_g1_i4	acyl- -binding domain-containing protein 6	550	20	5.64562e-48	0.6025
38201	c44220_g1_i1	acyl- -binding domain-containing protein 6	335	20	7.19003e-12	0.7255
38202	c44220_g1_i2	acyl- -binding domain-containing protein 6	433	20	1.68286e-11	0.7255
38203	c44220_g1_i3	acyl- -binding domain-containing protein 6	350	20	8.26982e-12	0.7255
38204	c44220_g1_i4	acyl- -binding domain-containing protein 6	323	20	6.40961e-12	0.7255
38205	c44220_g1_i5	acyl- -binding domain-containing protein 6	312	20	5.69877e-12	0.7255
12294	c27901_g1_i1	acyl- -binding protein	585	20	4.45475e-40	0.835
4093	c9652_g1_i1	acyl- dehydrogenase	223	20	2.01617e-29	0.814
7361	c17927_g1_i2	acyl- dehydrogenase	287	5	2.74047e-21	0.776
11991	c27468_g1_i1	acyl- dehydrogenase	291	17	2.79316e-33	0.6435
11992	c27468_g1_i2	acyl- dehydrogenase	385	19	1.01966e-46	0.5916
23471	c39454_g1_i1	acyl- dehydrogenase	294	7	9.43953e-22	0.7057
35013	c43612_g1_i2	acyl- dehydrogenase	769	20	1.15029e-102	0.8185
35014	c43612_g1_i3	acyl- dehydrogenase	348	20	1.55551e-46	0.848
52925	c46005_g1_i4	acyl- dehydrogenase	1467	20	3.03998e-152	0.815
52926	c46005_g1_i5	acyl- dehydrogenase	1455	20	2.64459e-152	0.815
67102	c55182_g1_i1	acyl- dehydrogenase	203	20	2.64956e-14	0.758
38670	c44307_g1_i1	acyl- dehydrogenase family member mitochondrial	537	20	6.0205e-62	0.748
38672	c44307_g1_i3	acyl- dehydrogenase family member mitochondrial	622	20	2.45968e-64	0.7385
38676	c44307_g1_i7	acyl- dehydrogenase family member mitochondrial	937	20	8.62007e-63	0.7385
38677	c44307_g1_i8	acyl- dehydrogenase family member mitochondrial	468	20	1.57792e-69	0.791
48117	c45523_g1_i3	acyl- dehydrogenase family member mitochondrial isoform 2	780	20	1.12288e-19	0.8485
48121	c45523_g1_i7	acyl- dehydrogenase family member mitochondrial isoform 2	806	20	3.44079e-22	0.8385
9408	c22626_g1_i1	acyl- dehydrogenase family member mitochondrial-like	312	20	8.06887e-25	0.7085
37609	c44123_g3_i1	acyl- dehydrogenase family member mitochondrial-like	1034	20	1.52911e-89	0.851
37610	c44123_g3_i2	acyl- dehydrogenase family member mitochondrial-like	1063	20	1.15195e-89	0.851
38671	c44307_g1_i2	acyl- dehydrogenase family member mitochondrial-like	575	20	5.36182e-19	0.68
38674	c44307_g1_i5	acyl- dehydrogenase family member mitochondrial-like	652	20	1.69255e-83	0.714
38675	c44307_g1_i6	acyl- dehydrogenase family member mitochondrial-like	594	20	1.66664e-83	0.7215
9410	c22626_g1_i3	acyl- dehydrogenase -like	236	20	1.65829e-21	0.771
59422	c46589_g3_i1	acyl- dehydrogenase -like	766	20	3.17019e-64	0.7405
59429	c46589_g3_i2	acyl- dehydrogenase -like	867	20	9.93767e-78	0.772
59430	c46589_g3_i3	acyl- dehydrogenase -like	239	20	7.29498e-21	0.8525
30843	c42524_g1_i1	acyl- delta desaturase-like	529	20	2.43043e-45	0.75
25928	c40723_g1_i2	acyl- delta-11 desaturase	429	20	3.48945e-22	0.731
25929	c40723_g1_i3	acyl- delta-11 desaturase	493	20	6.53122e-22	0.731
25930	c40723_g1_i4	acyl- delta-11 desaturase	484	20	5.98959e-22	0.731
32817	c43084_g1_i1	acyl- delta-9 desaturase	303	1	1.65303e-24	0.77
32818	c43084_g1_i2	acyl- delta-9 desaturase	370	1	3.68486e-24	0.77
32819	c43084_g1_i3	acyl- delta-9 desaturase	336	1	2.44155e-24	0.77
32820	c43084_g1_i4	acyl- delta-9 desaturase	360	1	3.21763e-24	0.77
23182	c39303_g1_i1	acyl- desaturase-like	331	20	1.75991e-39	0.8575
25569	c40557_g1_i1	acyl- oxidase	604	20	5.65239e-75	0.7055
25570	c40557_g1_i2	acyl- oxidase	542	20	1.64237e-59	0.782
30131	c42298_g1_i1	acyl- oxidase	516	20	2.20768e-44	0.5895
30132	c42298_g1_i2	acyl- oxidase	1105	20	3.64855e-117	0.6115
30133	c42298_g1_i3	acyl- oxidase	427	20	4.71166e-47	0.807
30135	c42298_g1_i5	acyl- oxidase	990	20	1.27293e-105	0.602
30136	c42298_g1_i6	acyl- oxidase	717	20	1.06751e-81	0.6155
3382	c7870_g1_i1	acyl- synthetase family member mitochondrial	292	20	1.56954e-30	0.752
3495	c8102_g1_i1	acyl- synthetase family member mitochondrial	237	20	3.04258e-24	0.8545
3496	c8102_g1_i2	acyl- synthetase family member mitochondrial	307	20	1.86798e-34	0.8025
47310	c45438_g1_i1	acyl- synthetase family member mitochondrial	287	20	3.18713e-21	0.811
47311	c45438_g1_i2	acyl- synthetase family member mitochondrial-like	390	20	5.56906e-43	0.741
30211	c42323_g1_i2	acyl- synthetase long- isoform c	370	20	1.32706e-25	0.707
25472	c40513_g2_i1	acyl- synthetase long- isoform d	369	20	8.94389e-12	0.685
56157	c46308_g3_i1	acyl- thioesterase 1	1941	20	1.12186e-19	0.4325
10652	c25218_g1_i1	acylamino-acid-releasing enzyme	427	20	3.66652e-20	0.6325
63251	c50240_g1_i1	acylamino-acid-releasing enzyme	202	20	1.13739e-15	0.6685
46965	c45398_g1_i3	acyl-coa dehydrogenase	243	20	8.94079e-30	0.887
30134	c42298_g1_i4	acyl-coenzyme a oxidase peroxisomal	208	20	1.62351e-25	0.8255
35360	c43689_g1_i1	acyl-coenzyme a oxidase peroxisomal	285	20	4.45119e-29	0.8255
35361	c43689_g1_i2	acyl-coenzyme a oxidase peroxisomal	427	20	7.38766e-60	0.846
35362	c43689_g1_i3	acyl-coenzyme a oxidase peroxisomal	237	20	1.48682e-32	0.815
35363	c43689_g2_i1	acyl-coenzyme a oxidase peroxisomal	217	10	1.87951e-14	0.806
35364	c43689_g1_i4	acyl-coenzyme a oxidase peroxisomal	270	20	3.68187e-29	0.8255
35365	c43689_g1_i5	acyl-coenzyme a oxidase peroxisomal	228	20	4.5065e-27	0.8985
31792	c42806_g1_i3	acyl-coenzyme a short branched chain	843	20	5.19459e-104	0.817
5882	c13899_g1_i1	acyl-coenzyme a synthetase mitochondrial-like	231	20	1.16523e-10	0.734
15543	c32796_g1_i1	acyl-coenzyme a thioesterase 4-like isoform x1	236	15	1.93821e-13	0.5693
17289	c34808_g1_i1	acyl-coenzyme a thioesterase 4-like isoform x1	246	11	2.03529e-10	0.5918
54882	c46200_g1_i6	acyl-coenzyme a thioesterase 4-like isoform x1	392	20	5.17917e-16	0.5535
17604	c35151_g1_i1	acyl-coenzyme a thioesterase 9	404	20	6.99586e-24	0.7125
17605	c35151_g1_i2	acyl-coenzyme a thioesterase 9	270	20	5.62892e-13	0.713
67022	c55072_g1_i1	acylglycerol mitochondrial-like	308	17	6.73557e-14	0.5782
15762	c33070_g1_i1	acylphosphatase-1-like	302	20	1.57525e-19	0.7635
61811	c48383_g1_i1	acylphosphatase-2-like isoform x1	223	8	2.20645e-07	0.6938
16209	c33637_g1_i2	acyl-protein thioesterase 1-like	238	20	2.88405e-31	0.8795
36188	c43848_g1_i1	acyl-protein thioesterase 1-like	211	20	2.24811e-21	0.7665
53648	c46078_g3_i2	acyltransferase family protein	534	20	1.85423e-12	0.481
17226	c34753_g1_i1	ACYPI002474	374	4	3.18798e-07	0.69
13060	c29370_g1_i2	ada regulatory protein methylated-dna--protein-cysteine methyltransferase	437	20	2.29986e-15	0.638
5915	c14016_g1_i1	adam 17	526	20	8.41619e-52	0.8665
61291	c47687_g1_i1	additional sex isoform d	337	20	2.51202e-07	0.6915
61403	c47837_g1_i1	adenomatous polyposis coli protein	284	20	4.69172e-34	0.8325
3792	c8926_g1_i1	adenosine deaminase	322	13	1.9315e-06	0.7038
3793	c8926_g1_i2	adenosine deaminase	401	20	2.92939e-23	0.715
15820	c33136_g1_i2	adenosine deaminase	350	8	8.06453e-13	0.6425
66039	c53824_g1_i1	adenosine deaminase	205	20	7.19925e-12	0.7095
45922	c45285_g2_i1	adenosine deaminase cecr1 isoform 1	2583	20	1.80441e-166	0.647
45923	c45285_g2_i2	adenosine deaminase cecr1 isoform 1	2066	20	3.86883e-163	0.6465
45925	c45285_g2_i4	adenosine deaminase cecr1 isoform 1	2526	20	7.82505e-167	0.6465
12657	c28623_g1_i1	adenosine deaminase cecr1-like	227	20	7.02137e-20	0.794
13946	c30773_g1_i1	adenosine deaminase cecr1-like	359	20	1.29986e-16	0.5975
13947	c30773_g1_i2	adenosine deaminase cecr1-like	263	20	9.06762e-12	0.642
13948	c30773_g1_i3	adenosine deaminase cecr1-like	397	20	2.76164e-18	0.6065
19230	c36565_g1_i1	adenosine deaminase-like protein isoform x1	445	20	2.19057e-30	0.6725
51732	c45895_g1_i1	adenosine kinase	316	19	4.51157e-10	0.8042
55209	c46229_g1_i1	adenosine kinase	519	20	5.57712e-38	0.789
55210	c46229_g1_i2	adenosine kinase	1050	20	1.10686e-41	0.6475
55211	c46229_g1_i3	adenosine kinase	499	20	1.81e-27	0.6865
55212	c46229_g1_i4	adenosine kinase	1019	20	8.43548e-41	0.72
55213	c46229_g1_i5	adenosine kinase	224	20	9.40414e-08	0.6935
55214	c46229_g1_i6	adenosine kinase	501	20	8.33226e-36	0.656
55215	c46229_g1_i7	adenosine kinase	619	20	7.51098e-39	0.719
51733	c45895_g1_i2	adenosine kinase 2	645	20	2.43283e-60	0.758
51736	c45895_g1_i5	adenosine kinase 2	783	20	2.43975e-81	0.7665
51737	c45895_g1_i6	adenosine kinase 2	674	20	6.38911e-82	0.7665
51738	c45895_g1_i7	adenosine kinase 2	397	20	1.04448e-24	0.832
51735	c45895_g1_i4	adenosine kinase 2-like	442	20	1.33515e-48	0.7345
51734	c45895_g1_i3	adenosine kinase-like isoform x2	262	20	1.57516e-26	0.7665
26240	c40842_g1_i2	adenosine receptor a1-like	605	20	8.85566e-19	0.5425
26241	c40842_g1_i3	adenosine receptor a1-like	825	20	2.19548e-18	0.5425
50763	c45795_g1_i2	adenosine rna- b1	462	20	2.24145e-08	0.548
40360	c44554_g6_i1	adenosylhomocysteinase	855	20	1.99877e-77	0.876
40362	c44554_g6_i2	adenosylhomocysteinase	716	20	7.77471e-81	0.8715
40363	c44554_g6_i3	adenosylhomocysteinase	857	20	1.1121e-80	0.8715
18188	c35646_g1_i2	adenosylhomocysteinase 3	458	20	1.27817e-80	0.919
18187	c35646_g1_i1	adenosylhomocysteinase 3-like	546	20	9.2101e-84	0.911
18189	c35646_g1_i3	adenosylhomocysteinase 3-like	637	20	6.84535e-83	0.9085
25412	c40495_g1_i3	adenosylhomocysteinase 3-like	358	20	7.45812e-26	0.964
52201	c45937_g1_i1	adenosylhomocysteinase 3-like	1256	20	1.50247e-72	0.9485
52202	c45937_g1_i2	adenosylhomocysteinase 3-like	1272	20	9.17096e-82	0.944
49158	c45634_g2_i1	adenosylhomocysteinase 3-like isoform 2	205	20	4.13814e-28	0.9275
49159	c45634_g2_i2	adenosylhomocysteinase 3-like isoform 2	210	20	1.57212e-30	0.932
49160	c45634_g2_i3	adenosylhomocysteinase 3-like isoform 2	248	20	5.31498e-37	0.9475
48346	c45546_g1_i2	adenylate cyclase	1157	20	1.14079e-42	0.5455
48350	c45546_g1_i6	adenylate cyclase	1076	20	6.08402e-43	0.5455
59300	c46578_g2_i6	adenylate cyclase	1672	20	9.68424e-23	0.5205
64271	c51528_g1_i1	adenylate cyclase	352	20	1.56065e-35	0.695
55992	c46294_g1_i6	adenylate cyclase type 2	229	20	1.27517e-08	0.6195
39985	c44499_g3_i1	adenylate cyclase type 2-like	274	20	9.53557e-18	0.7095
39988	c44499_g3_i3	adenylate cyclase type 2-like	359	20	4.26802e-21	0.675
39991	c44499_g3_i5	adenylate cyclase type 2-like	282	20	2.53454e-13	0.674
39995	c44499_g3_i7	adenylate cyclase type 2-like	335	20	4.57637e-21	0.678
40001	c44499_g3_i8	adenylate cyclase type 2-like	257	17	1.03091e-09	0.6647
40002	c44499_g3_i9	adenylate cyclase type 2-like	439	20	5.07145e-12	0.6805
40003	c44499_g3_i10	adenylate cyclase type 2-like	362	20	4.8952e-18	0.683
43698	c45019_g1_i1	adenylate cyclase type 2-like	532	20	9.96601e-36	0.6975
43701	c45019_g1_i3	adenylate cyclase type 2-like	460	20	3.86665e-46	0.694
43703	c45019_g1_i4	adenylate cyclase type 2-like	300	20	1.29734e-24	0.7205
43704	c45019_g1_i5	adenylate cyclase type 2-like	400	20	8.36573e-31	0.645
43706	c45019_g1_i6	adenylate cyclase type 2-like	399	20	6.55523e-28	0.724
43708	c45019_g1_i8	adenylate cyclase type 2-like	252	20	8.99293e-21	0.6805
55983	c46294_g1_i2	adenylate cyclase type 2-like	695	20	1.03032e-15	0.6215
55986	c46294_g1_i4	adenylate cyclase type 2-like	813	20	3.57748e-19	0.605
55996	c46294_g2_i3	adenylate cyclase type 6	330	20	3.97692e-29	0.7545
43705	c45019_g3_i1	adenylate cyclase type 7	260	19	4.04525e-06	0.71
4231	c9917_g1_i1	adenylate kinase	206	20	2.49051e-13	0.892
15269	c32498_g1_i1	adenylate kinase 2	346	20	7.95199e-45	0.827
57513	c46426_g3_i3	adenylate kinase isoenzyme	255	20	1.19015e-15	0.8165
57512	c46426_g3_i2	adenylate kinase isoenzyme 1	606	20	8.92033e-46	0.8045
57515	c46426_g3_i5	adenylate kinase isoenzyme 1	537	20	1.41252e-31	0.745
57516	c46426_g3_i6	adenylate kinase isoenzyme 1	757	20	4.03008e-58	0.8015
57519	c46426_g3_i9	adenylate kinase isoenzyme 1	593	20	1.62389e-41	0.789
26670	c41029_g1_i2	adenylate kinase isoenzyme 6	377	20	8.45748e-42	0.804
26669	c41029_g1_i1	adenylate kinase isoenzyme 6-like	443	20	2.34365e-43	0.803
55959	c46293_g2_i1	adenylosuccinate synthetase isozyme 1	504	20	2.57333e-57	0.912
55965	c46293_g2_i3	adenylosuccinate synthetase isozyme 1 c-like	210	20	1.06106e-15	0.7775
433	c1030_g1_i1	adenylosuccinate synthetase isozyme 2	244	20	1.7634e-37	0.8525
17961	c35453_g1_i1	adenylosuccinate synthetase isozyme 2-like	309	20	3.81082e-18	0.786
20325	c37475_g1_i1	adenylosuccinate synthetase-like	427	20	1.17286e-29	0.9135
20326	c37475_g1_i2	adenylosuccinate synthetase-like	429	20	9.82961e-30	0.92
55964	c46293_g2_i2	adenylosuccinate synthetase-like	251	20	3.2907e-37	0.8925
55981	c46294_g2_i1	adenylyl cyclase 76e	203	20	3.87602e-11	0.791
55989	c46294_g2_i2	adenylyl cyclase isoform b	558	20	1.45085e-56	0.783
56332	c46323_g1_i4	adenylyl cyclase-associated protein	615	20	2.25155e-44	0.616
56334	c46323_g1_i6	adenylyl cyclase-associated protein	514	20	4.62703e-38	0.6065
47609	c45473_g1_i1	adenylyl cyclase-associated protein 1	442	20	8.34347e-21	0.5545
47610	c45473_g1_i2	adenylyl cyclase-associated protein 1	485	20	6.9341e-34	0.582
47616	c45473_g1_i3	adenylyl cyclase-associated protein 1	387	20	3.51228e-31	0.635
47619	c45473_g1_i4	adenylyl cyclase-associated protein 1	533	20	2.05195e-35	0.575
56329	c46323_g1_i1	adenylyl cyclase-associated protein 1	894	20	2.89259e-76	0.7205
56331	c46323_g1_i3	adenylyl cyclase-associated protein 2	278	10	2.57128e-07	0.581
56333	c46323_g1_i5	adenylyl cyclase-associated protein 2	935	20	8.74863e-74	0.708
25123	c40365_g2_i1	adhesion regulating molecule 1	205	20	6.38748e-28	0.7235
25124	c40365_g1_i2	adhesion regulating molecule 1	265	20	1.5178e-32	0.897
25122	c40365_g1_i1	adhesion-regulating molecule 1	215	20	2.03482e-30	0.916
25125	c40365_g1_i3	adhesion-regulating molecule 1	234	20	1.02346e-25	0.8475
59043	c46559_g4_i1	adipocyte plasma membrane-associated	647	20	1.50283e-56	0.685
59051	c46559_g4_i4	adipocyte plasma membrane-associated	637	20	4.10677e-46	0.677
59044	c46559_g4_i2	adipocyte plasma membrane-associated protein	394	20	3.76915e-11	0.625
38082	c44202_g3_i5	adiponectin receptor 2	247	19	2.5312e-09	0.6305
38081	c44202_g3_i4	adiponectin receptor protein 1-like	271	20	8.80161e-12	0.628
18146	c35613_g1_i1	adipor-like receptor cg5315-like	415	20	6.45006e-25	0.8985
18147	c35613_g1_i2	adipor-like receptor cg5315-like	396	20	2.4501e-24	0.9245
38080	c44202_g3_i3	adipor-like receptor cg5315-like	1218	20	5.51931e-102	0.712
23836	c39663_g1_i1	adp atp translocase	681	20	3.42572e-124	0.9275
38024	c44192_g2_i2	adp atp translocase	672	20	1.6426e-61	0.875
38023	c44192_g2_i1	adp atp translocase 1	604	20	2.75963e-44	0.9085
11840	c27241_g1_i1	adp-dependent glucokinase-like	324	20	8.26564e-12	0.6665
42055	c44799_g2_i1	adp-ribose mitochondrial	329	20	1.04137e-10	0.7375
42056	c44799_g2_i2	adp-ribose mitochondrial	452	20	5.49906e-43	0.6985
42057	c44799_g2_i3	adp-ribose mitochondrial	504	20	2.74025e-24	0.7655
42058	c44799_g2_i4	adp-ribose mitochondrial	387	20	2.8435e-12	0.7085
42059	c44799_g2_i5	adp-ribose mitochondrial	905	20	3.46399e-73	0.704
45585	c45243_g1_i1	adp-ribosylation factor 1	823	20	2.89069e-110	0.996
45586	c45243_g1_i2	adp-ribosylation factor 1	1019	20	5.07636e-126	0.978
45587	c45243_g1_i3	adp-ribosylation factor 1	1126	20	1.78578e-125	0.978
45589	c45243_g1_i5	adp-ribosylation factor 1	1173	20	3.14107e-125	0.978
53388	c46048_g1_i1	adp-ribosylation factor 2-like	204	20	4.35683e-34	0.9245
53390	c46048_g1_i3	adp-ribosylation factor 2-like	490	20	5.47158e-53	0.8535
53392	c46048_g1_i4	adp-ribosylation factor 2-like	703	20	2.97485e-71	0.9165
53396	c46048_g1_i7	adp-ribosylation factor 2-like	528	20	1.38387e-63	0.912
53389	c46048_g1_i2	adp-ribosylation factor 4	910	20	2.41385e-123	0.9365
53394	c46048_g1_i5	adp-ribosylation factor 4	706	20	1.70889e-81	0.9195
53395	c46048_g1_i6	adp-ribosylation factor 4	980	20	5.6296e-123	0.9375
37391	c44089_g3_i1	adp-ribosylation factor gtpase-activating	810	20	5.63685e-28	0.7115
37400	c44089_g3_i5	adp-ribosylation factor gtpase-activating	822	20	2.38646e-28	0.723
36627	c43940_g1_i3	adp-ribosylation factor gtpase-activating protein	336	1	7.47384e-07	0.84
36628	c43940_g2_i1	adp-ribosylation factor gtpase-activating protein	506	1	5.28207e-30	0.75
36629	c43940_g2_i2	adp-ribosylation factor gtpase-activating protein	236	1	2.01084e-06	0.7
36630	c43940_g2_i3	adp-ribosylation factor gtpase-activating protein	275	1	1.17843e-07	0.65
14279	c31288_g1_i1	adp-ribosylation factor gtpase-activating protein 2-like	355	20	8.88729e-59	0.908
21268	c38119_g1_i1	adp-ribosylation factor-like protein 1-like	259	20	4.89351e-28	0.883
21269	c38119_g1_i2	adp-ribosylation factor-like protein 1-like	556	20	1.18109e-108	0.9295
21270	c38119_g1_i3	adp-ribosylation factor-like protein 1-like	404	20	2.67008e-65	0.8905
65207	c52770_g1_i1	adp-ribosylation factor-like protein 2	242	20	2.06958e-31	0.851
9976	c23827_g1_i1	adp-ribosylation factor-like protein 4d	244	20	2.06364e-22	0.7005
9977	c23827_g1_i2	adp-ribosylation factor-like protein 4d	206	20	7.47501e-09	0.8315
22568	c38975_g2_i1	adp-ribosylation factor-like protein 8b	490	20	9.71626e-59	0.9425
37646	c44129_g1_i1	adp-ribosylation factor-related protein 1-like	695	20	1.43308e-101	0.86
37648	c44129_g1_i3	adp-ribosylation factor-related protein 1-like	860	20	2.12718e-88	0.844
37649	c44129_g1_i4	adp-ribosylation factor-related protein 1-like	805	20	1.12334e-88	0.844
37650	c44129_g1_i5	adp-ribosylation factor-related protein 1-like	809	20	1.16424e-88	0.844
45758	c45265_g1_i5	af091117_1cytochrome p450	227	5	3.25282e-10	0.636
24301	c39953_g1_i2	af104400_1spt6 protein	218	2	9.91491e-06	0.73
31357	c42684_g1_i1	af109924_1sulfatase 1 precursor	286	2	7.65695e-06	0.54
9030	c21774_g1_i1	af148497_1beta -endoglucanase	237	1	1.5826e-13	1
5646	c13275_g1_i1	af185643_1toll-related protein	213	20	1.00938e-12	0.68
6030	c14317_g1_i3	af318285_1 rhomboid-4	366	16	1.74813e-08	0.7425
44760	c45148_g1_i1	af318285_1 rhomboid-4	275	5	7.15541e-06	0.692
20856	c37810_g1_i1	af355375_1 reverse transcriptase	239	20	1.03608e-08	0.629
46936	c45395_g2_i7	af355375_1 reverse transcriptase	264	1	4.73993e-07	0.85
24443	c40020_g1_i1	af357226_1cub-serine protease	514	5	5.48116e-08	0.592
10942	c25790_g1_i1	AF391295_5unknown	264	4	7.22771e-10	0.625
18462	c35895_g1_i1	af4 fmr2 family member 3	406	20	1.9792e-14	0.6415
45199	c45201_g3_i1	af4 fmr2 family member 4-like isoform x1	403	20	2.22108e-14	0.661
23275	c39357_g1_i1	af445309_1hemolectin-like protein	366	20	3.55897e-36	0.5075
23276	c39357_g1_i2	af445309_1hemolectin-like protein	229	2	2.86525e-21	0.745
17554	c35117_g1_i2	af445314_1scylla-like protein	517	1	7.62029e-29	0.86
12131	c27658_g1_i2	af520716_1 mical-like protein	379	20	7.43487e-13	0.694
9263	c22269_g1_i1	afadin	428	20	8.49723e-59	0.7755
12483	c28344_g1_i1	afadin (af-6 protein)	338	20	1.91206e-37	0.74
2240	c5267_g1_i1	afadin-like isoform x1	231	20	8.73704e-17	0.864
3061	c7223_g1_i1	afadin-like isoform x1	245	20	4.54491e-14	0.8885
24055	c39798_g1_i1	afadin-like isoform x1	381	20	2.21031e-23	0.8265
11316	c26426_g1_i2	afg3-like protein 2	476	20	2.7748e-69	0.9415
9169	c22094_g1_i1	afg3-like protein 2-like	211	20	1.94624e-30	0.965
11315	c26426_g1_i1	afg3-like protein 2-like	321	20	1.01952e-55	0.975
28093	c41601_g1_i5	AGAP002028-PA	525	1	2.23915e-06	0.57
65198	c52760_g1_i1	AGAP003445-PA	265	3	4.46872e-07	0.5533
64152	c51391_g1_i1	AGAP004936-PA	204	2	1.62183e-06	0.695
3154	c7399_g1_i1	agap007489- partial	326	2	5.66959e-06	0.66
44380	c45104_g1_i3	AGAP007584-PA	206	7	3.13567e-10	0.7843
59551	c46600_g3_i1	AGAP007696-PA	583	1	3.75948e-06	0.68
2647	c6275_g1_i1	AGAP009539-PA	205	1	7.56357e-07	0.66
6693	c16119_g1_i1	agap010322 protein	376	20	1.20977e-57	0.951
64574	c51918_g1_i1	AGAP010710-PA	264	2	1.91892e-06	0.715
33445	c43245_g2_i1	AGAP012165-PA	714	20	5.7976e-45	0.7145
18414	c35851_g1_i1	agc family protein kinase	337	20	1.49855e-14	0.564
17026	c34540_g1_i1	agc pdk1 protein kinase	306	20	1.76315e-35	0.787
48668	c45584_g1_i1	agmatinase	1080	20	6.35292e-102	0.7975
48672	c45584_g1_i5	agmatinase	1313	20	3.74993e-102	0.797
48673	c45584_g1_i6	agmat-prov protein	679	20	2.16993e-67	0.789
18780	c36192_g1_i1	a-kinase anchor protein 13	258	20	4.22463e-20	0.6565
18781	c36192_g1_i2	a-kinase anchor protein 13 isoform x1	209	20	4.53925e-14	0.776
19774	c37034_g1_i1	a-kinase anchor protein 13-like	351	20	4.36391e-27	0.719
65709	c53383_g1_i1	a-kinase anchor protein 17a	223	11	1.26091e-07	0.7536
46820	c45381_g1_i2	a-kinase anchor protein 6	800	14	5.11862e-18	0.505
46822	c45381_g1_i4	a-kinase anchor protein 6	752	15	2.1553e-18	0.5053
15117	c32334_g1_i1	akt-interacting protein isoform x1	461	20	2.31047e-10	0.629
61718	c48269_g1_i1	aladin-like isoform x2	309	20	5.75434e-09	0.5255
53489	c46060_g1_i2	alanine aminotransferase	1562	20	0	0.8045
53490	c46060_g1_i3	alanine aminotransferase	1374	20	7.85129e-161	0.7965
53491	c46060_g1_i4	alanine aminotransferase	995	20	3.39409e-107	0.837
53492	c46060_g1_i5	alanine aminotransferase	1617	20	0	0.8045
53493	c46060_g1_i6	alanine aminotransferase	355	20	4.38281e-38	0.7775
53494	c46060_g1_i7	alanine aminotransferase	1091	20	1.20143e-125	0.8105
53495	c46060_g1_i8	alanine aminotransferase	1056	20	6.23203e-122	0.814
53497	c46060_g1_i10	alanine aminotransferase	1451	20	2.78143e-165	0.8085
53488	c46060_g1_i1	alanine aminotransferase 2	240	20	2.47069e-26	0.7835
53496	c46060_g1_i9	alanine aminotransferase 2-like	936	20	4.51765e-101	0.7775
15763	c33071_g1_i1	alanine racemase	454	20	1.90573e-66	0.5245
16667	c34090_g1_i1	alanine racemase	322	1	6.75875e-12	0.68
47644	c45474_g2_i1	alanine--glyoxylate aminotransferase 2-like	685	20	2.15856e-70	0.7515
47645	c45474_g2_i2	alanine--glyoxylate aminotransferase 2-like	812	20	1.86001e-95	0.822
47646	c45474_g2_i3	alanine--glyoxylate aminotransferase 2-like	597	20	1.03203e-64	0.7545
47647	c45474_g2_i4	alanine--glyoxylate aminotransferase 2-like	553	20	2.42727e-59	0.758
47648	c45474_g2_i5	alanine--glyoxylate aminotransferase 2-like	851	20	2.46334e-89	0.774
33506	c43260_g1_i2	alanine-glyoxylate aminotransferase 2-like 2	648	20	2.17732e-44	0.761
35497	c43718_g1_i1	alanine--trna cytoplasmic-like	448	20	4.99157e-64	0.7925
35500	c43718_g1_i4	alanine--trna cytoplasmic-like	610	20	5.31016e-72	0.785
35501	c43718_g1_i5	alanine--trna cytoplasmic-like	607	20	1.00532e-71	0.786
66	c134_g1_i1	alanine--trna mitochondrial	316	20	2.43955e-44	0.783
10949	c25808_g1_i1	alanyl-trna editing protein aarsd1	244	20	1.57771e-30	0.778
15248	c32472_g1_i1	alanyl-trna editing protein aarsd1	453	20	5.73208e-42	0.7235
578	c1397_g1_i1	alanyl-trna partial	239	20	3.42625e-25	0.7955
22108	c38691_g1_i1	alanyl-trna partial	480	20	1.35191e-60	0.95
22109	c38691_g1_i2	alanyl-trna partial	443	20	3.10372e-44	0.94
22110	c38691_g1_i3	alanyl-trna partial	290	20	1.64394e-21	0.934
22111	c38691_g1_i4	alanyl-trna partial	510	20	2.15267e-57	0.95
10664	c25245_g1_i1	alanyl-trna synthetase	262	20	3.06099e-35	0.9085
35499	c43718_g1_i3	alanyl-trna synthetase	233	20	8.00327e-29	0.816
35502	c43718_g1_i6	alanyl-trna synthetase	915	20	6.17573e-72	0.787
35503	c43718_g1_i7	alanyl-trna synthetase	768	20	4.41176e-72	0.787
20125	c37336_g1_i1	alcohol dehydrogenase	341	20	6.18038e-18	0.685
37787	c44152_g2_i2	alcohol dehydrogenase	920	20	4.60471e-13	0.5345
43955	c45050_g1_i2	alcohol dehydrogenase	537	20	8.9735e-62	0.91
43956	c45050_g1_i3	alcohol dehydrogenase	736	20	1.08177e-92	0.873
43958	c45050_g1_i5	alcohol dehydrogenase	634	20	4.95745e-80	0.8735
49803	c45702_g1_i1	alcohol dehydrogenase	513	20	1.88575e-25	0.5465
56947	c46380_g1_i1	alcohol dehydrogenase	1067	20	1.87571e-76	0.646
56949	c46380_g1_i3	alcohol dehydrogenase	1035	20	2.1267e-81	0.6455
56953	c46380_g1_i5	alcohol dehydrogenase	1033	20	1.69604e-77	0.648
27674	c41442_g1_i1	alcohol dehydrogenase class-3	535	20	6.72727e-25	0.815
43957	c45050_g1_i4	alcohol dehydrogenase class-3	659	20	5.21496e-85	0.8585
18644	c36068_g1_i1	alcohol dehydrogenase class-3-like	301	20	5.0112e-32	0.857
20001	c37234_g1_i1	aldehyde dehydrogenase	291	20	5.7365e-25	0.6965
20002	c37234_g1_i2	aldehyde dehydrogenase	278	20	2.693e-26	0.6945
20004	c37234_g1_i4	aldehyde dehydrogenase	286	20	3.10108e-26	0.6955
26406	c40906_g1_i4	aldehyde dehydrogenase	377	20	2.72593e-32	0.8265
27698	c41454_g1_i1	aldehyde dehydrogenase	244	20	2.3994e-13	0.623
28834	c41876_g1_i1	aldehyde dehydrogenase	616	20	2.90363e-81	0.8555
28835	c41876_g1_i2	aldehyde dehydrogenase	624	20	1.98961e-83	0.8605
28911	c41894_g3_i1	aldehyde dehydrogenase	849	20	1.53125e-121	0.832
28912	c41894_g3_i2	aldehyde dehydrogenase	848	20	1.71438e-115	0.832
43825	c45035_g3_i1	aldehyde dehydrogenase	585	20	1.95349e-30	0.702
43826	c45035_g3_i2	aldehyde dehydrogenase	545	20	6.46895e-31	0.7045
44283	c45093_g2_i1	aldehyde dehydrogenase	237	20	1.39899e-09	0.8285
44284	c45093_g2_i2	aldehyde dehydrogenase	228	20	3.29509e-17	0.6925
44287	c45093_g3_i2	aldehyde dehydrogenase	210	20	8.70188e-14	0.798
44310	c45095_g1_i7	aldehyde dehydrogenase	223	4	2.98136e-08	0.7675
49110	c45630_g1_i2	aldehyde dehydrogenase 1 member b1	474	20	3.16004e-47	0.8235
26403	c40906_g1_i1	aldehyde dehydrogenase 16 member a1	564	20	8.20889e-57	0.753
26404	c40906_g1_i2	aldehyde dehydrogenase 16 member a1	592	20	1.0187e-60	0.753
26405	c40906_g1_i3	aldehyde dehydrogenase 16 member a1	497	20	1.47343e-45	0.752
27699	c41454_g1_i2	aldehyde dehydrogenase 16 member a1	417	20	9.53381e-36	0.625
27700	c41454_g1_i3	aldehyde dehydrogenase 16 member a1	201	17	1.01186e-09	0.6312
27701	c41454_g1_i4	aldehyde dehydrogenase 16 member a1	337	20	3.68507e-31	0.673
49109	c45630_g1_i1	aldehyde dehydrogenase 2 family	462	20	1.81255e-60	0.8055
43292	c44963_g1_i4	aldehyde dehydrogenase 7 member a1	500	20	3.18638e-59	0.797
10351	c24579_g1_i1	aldehyde dehydrogenase family 16 member a1	278	20	7.14515e-33	0.7785
20003	c37234_g1_i3	aldehyde dehydrogenase family 16 member a1-like	374	20	2.14762e-42	0.712
61844	c48426_g1_i1	aldehyde dehydrogenase family 16 member a1-like	283	20	7.42862e-37	0.8575
24379	c39992_g1_i1	aldehyde dehydrogenase family 3 member b1-like	321	3	1.7203e-07	0.7333
43296	c44963_g1_i7	aldehyde dehydrogenase family 7 member a1 homolog	336	20	5.24262e-42	0.788
50242	c45747_g2_i12	aldehyde dehydrogenase family 8 member a1	547	20	1.62905e-16	0.8215
54146	c46126_g1_i2	aldehyde dehydrogenase family 8 member a1 isoform 1	1159	20	8.99274e-117	0.7575
54147	c46126_g1_i3	aldehyde dehydrogenase family 8 member a1 isoform 1	1163	20	9.64911e-117	0.7575
54152	c46126_g1_i4	aldehyde dehydrogenase family 8 member a1 isoform 1	1145	20	2.50195e-116	0.7575
54145	c46126_g1_i1	aldehyde dehydrogenase family 8 member a1 isoform x1	1023	20	2.82716e-111	0.761
50233	c45747_g2_i3	aldehyde dehydrogenase family 8 member a1 isoform x3	667	20	7.9196e-23	0.791
50243	c45747_g2_i13	aldehyde dehydrogenase family 8 member a1 isoform x3	752	20	2.29001e-53	0.804
50236	c45747_g2_i6	aldehyde dehydrogenase family 8 member a1-like	278	20	1.46452e-30	0.7195
50239	c45747_g2_i9	aldehyde dehydrogenase family 8 member a1-like	780	20	2.43483e-56	0.794
50241	c45747_g2_i11	aldehyde dehydrogenase family 8 member a1-like	214	20	8.78532e-21	0.83
50245	c45747_g2_i15	aldehyde dehydrogenase family 8 member a1-like	277	20	1.95802e-24	0.766
49111	c45630_g1_i3	aldehyde dehydrogenase mitochondrial	563	20	8.73508e-61	0.787
41392	c44707_g1_i1	aldehyde dimeric nadp-preferring	620	20	6.42269e-77	0.8455
41393	c44707_g1_i2	aldehyde dimeric nadp-preferring	282	20	1.75893e-39	0.8765
41394	c44707_g1_i3	aldehyde dimeric nadp-preferring	384	20	2.32769e-60	0.884
41395	c44707_g1_i4	aldehyde dimeric nadp-preferring	349	20	1.74237e-52	0.8815
41396	c44707_g1_i5	aldehyde dimeric nadp-preferring-like isoform 1	695	20	1.56274e-103	0.8125
49112	c45630_g2_i1	aldehyde mitochondrial isoform x1	894	20	1.65268e-36	0.919
20340	c37490_g1_i1	aldehyde oxidase	242	20	1.29578e-14	0.642
23602	c39535_g1_i1	aldehyde oxidase	545	20	7.8545e-27	0.5375
29348	c42040_g1_i4	aldehyde oxidase	340	20	1.17851e-20	0.6715
45307	c45217_g2_i1	aldehyde oxidase	730	20	4.44266e-42	0.617
46397	c45336_g1_i2	aldehyde oxidase	1603	20	7.07256e-114	0.562
46398	c45336_g1_i3	aldehyde oxidase	458	20	9.5232e-33	0.674
46401	c45336_g1_i4	aldehyde oxidase	1556	20	5.94191e-114	0.5615
46402	c45336_g1_i5	aldehyde oxidase	1025	20	3.55971e-80	0.559
48240	c45534_g1_i2	aldehyde oxidase 2	308	6	4.42281e-08	0.5717
52989	c46012_g1_i2	aldehyde oxidase 2-like	474	20	9.30497e-39	0.659
29346	c42040_g1_i2	aldehyde oxidase and xanthine molybdopterin binding domain containing protein	201	2	5.53885e-07	0.675
20593	c37660_g1_i1	aldo-keto reductase	402	20	1.29307e-30	0.75
20594	c37660_g1_i2	aldo-keto reductase	269	20	2.59368e-31	0.75
33859	c43337_g1_i1	aldo-keto reductase	473	20	3.37442e-35	0.804
33860	c43337_g2_i1	aldo-keto reductase	391	20	2.81468e-53	0.8015
33861	c43337_g2_i2	aldo-keto reductase	542	20	4.72054e-84	0.792
37337	c44079_g3_i1	aldo-keto reductase	272	20	3.77754e-26	0.771
37338	c44079_g3_i2	aldo-keto reductase	1401	20	6.42947e-105	0.7885
56948	c46380_g1_i2	aldo-keto reductase	209	20	1.64329e-09	0.8555
56950	c46380_g1_i4	aldo-keto reductase	1024	20	9.03689e-78	0.641
27491	c41367_g2_i1	aldo-keto reductase family 4 member c9-like	242	20	3.25331e-15	0.6665
27493	c41367_g2_i2	aldo-keto reductase family 4 member c9-like	271	20	4.5765e-15	0.6665
30457	c42404_g1_i2	aldose 1-epimerase	201	20	1.13372e-22	0.8965
56627	c46350_g1_i1	aldose 1-epimerase	916	20	2.1688e-32	0.652
56628	c46350_g1_i2	aldose 1-epimerase	1028	20	4.76893e-45	0.656
56629	c46350_g1_i3	aldose 1-epimerase	702	20	4.99155e-17	0.66
56630	c46350_g1_i4	aldose 1-epimerase	683	20	6.95632e-42	0.6445
56631	c46350_g1_i5	aldose 1-epimerase	766	20	2.56664e-43	0.634
56632	c46350_g1_i6	aldose 1-epimerase	889	20	5.82373e-29	0.641
56634	c46350_g2_i1	aldose 1-epimerase	519	20	1.02733e-27	0.6455
18265	c35704_g1_i1	aldose reductase	278	20	6.52024e-12	0.681
20126	c37336_g1_i2	aldose reductase	237	20	1.88554e-13	0.756
40053	c44507_g3_i1	alg- partial	278	20	1.46555e-26	0.7195
40054	c44507_g3_i2	alg- partial	404	20	1.70824e-36	0.708
38955	c44347_g3_i1	alg-2 interacting protein x	279	1	1.75214e-19	0.75
38956	c44347_g3_i2	alg-2 interacting protein x	523	1	3.39649e-18	0.89
38957	c44347_g3_i3	alg-2 interacting protein x	375	1	7.21495e-19	0.89
54254	c46136_g2_i2	aliphatic nitrilase	1277	20	0	0.801
31756	c42796_g1_i2	alkaline ceramidase	257	20	5.18007e-14	0.7385
31757	c42796_g1_i3	alkaline ceramidase	337	20	3.53499e-24	0.743
31758	c42796_g1_i4	alkaline ceramidase	336	20	3.39918e-20	0.711
42823	c44896_g1_i1	alkaline ceramidase	451	20	1.51178e-16	0.5665
42827	c44896_g1_i3	alkaline ceramidase-like	716	20	9.83874e-18	0.68
31755	c42796_g1_i1	alkaline ceramidase-like isoform 1	318	20	1.3264e-20	0.706
42826	c44896_g1_i2	alkaline ceramidase-like isoform 1	688	20	1.52658e-30	0.581
11543	c26795_g1_i1	alkaline phosphatase	213	20	1.03663e-12	0.734
13649	c30344_g1_i1	alkaline phosphatase	1643	20	2.40524e-121	0.63
42979	c44921_g1_i1	alkaline phosphatase	2079	20	9.73679e-155	0.6295
32626	c43032_g2_i1	alkylated dna repair protein alkb homolog 1-like	236	20	1.01162e-17	0.7235
63573	c50636_g1_i1	alkylated dna repair protein alkb homolog 8	259	20	1.09218e-20	0.7575
12001	c27491_g1_i1	alkylated dna repair protein alkb-like protein 4	220	20	1.6341e-15	0.79
2705	c6402_g1_i1	alkyldihydroxyacetonephosphate peroxisomal	222	20	3.17907e-15	0.7795
62032	c48658_g1_i1	alkyldihydroxyacetonephosphate peroxisomal	231	20	1.02412e-13	0.635
65050	c52562_g1_i1	alkyldihydroxyacetonephosphate peroxisomal	237	20	6.85293e-26	0.8935
67249	c55375_g1_i1	alkyldihydroxyacetonephosphate peroxisomal	204	20	1.79005e-21	0.7675
12306	c27919_g1_i1	alkylglycerol monooxygenase	381	20	2.94324e-10	0.6815
44847	c45158_g1_i3	alkylglycerol monooxygenase	1704	20	4.63834e-81	0.75
44848	c45158_g1_i4	alkylglycerol monooxygenase	1367	20	3.46522e-81	0.75
49638	c45685_g3_i2	alkylglycerol monooxygenase-like	303	20	4.98458e-15	0.699
49639	c45685_g3_i3	alkylglycerol monooxygenase-like	527	20	2.256e-41	0.7365
5910	c14006_g1_i1	allantoicase	293	20	7.78903e-14	0.6095
7020	c17062_g1_i1	allantoicase	292	20	2.26266e-43	0.8325
7021	c17062_g1_i2	allantoicase	256	20	3.18586e-31	0.824
60513	c46721_g1_i1	allantoinase	278	20	7.98105e-12	0.802
31351	c42682_g1_i2	allene oxide synthase-lipoxygenase	490	20	7.6845e-51	0.673
31352	c42682_g1_i3	allene oxide synthase-lipoxygenase	291	20	1.60911e-31	0.7375
34924	c43597_g1_i1	allene oxide synthase-lipoxygenase	459	20	5.98739e-39	0.706
34925	c43597_g1_i2	allene oxide synthase-lipoxygenase	286	20	4.42232e-21	0.7345
34927	c43597_g1_i4	allene oxide synthase-lipoxygenase	514	20	6.05227e-46	0.7125
34928	c43597_g1_i5	allene oxide synthase-lipoxygenase	506	20	5.50159e-46	0.7125
31350	c42682_g1_i1	allene oxide synthase-lipoxygenase protein	444	20	9.40166e-37	0.6395
44502	c45118_g1_i2	allene oxide synthase-lipoxygenase protein	1139	20	3.22689e-29	0.489
11456	c26658_g1_i1	all-trans-retinol -reductase-like	230	20	1.00698e-17	0.6875
34758	c43556_g1_i1	all-trans-retinol -reductase-like	841	20	4.22105e-58	0.676
34759	c43556_g1_i2	all-trans-retinol -reductase-like	501	20	4.81961e-29	0.7125
34760	c43556_g1_i3	all-trans-retinol -reductase-like	446	20	5.13925e-19	0.6375
34761	c43556_g1_i4	all-trans-retinol -reductase-like	802	20	1.49715e-52	0.676
43073	c44938_g1_i1	all-trans-retinol -reductase-like	794	20	1.18089e-21	0.6745
43074	c44938_g1_i2	all-trans-retinol -reductase-like	678	20	2.55316e-22	0.6745
45693	c45259_g1_i1	all-trans-retinol -reductase-like	980	20	4.50794e-43	0.7045
45694	c45259_g1_i2	all-trans-retinol -reductase-like	879	20	1.78818e-43	0.7045
45696	c45259_g1_i3	all-trans-retinol -reductase-like	897	20	2.11567e-43	0.7045
45697	c45259_g1_i4	all-trans-retinol -reductase-like	641	20	1.60151e-44	0.7045
45698	c45259_g1_i5	all-trans-retinol -reductase-like	552	20	1.19789e-44	0.734
45699	c45259_g1_i6	all-trans-retinol -reductase-like	556	20	7.74723e-45	0.7055
45700	c45259_g1_i7	all-trans-retinol -reductase-like	622	20	1.31345e-44	0.7045
4616	c10843_g1_i1	alpha 2 macroglobulin	404	14	8.66175e-45	0.615
7573	c18467_g1_i1	alpha 2 macroglobulin	328	12	7.36096e-09	0.7142
7635	c18610_g1_i1	alpha 2 macroglobulin	239	20	1.17267e-14	0.707
10539	c24989_g1_i1	alpha 2 macroglobulin	495	13	1.30816e-24	0.5438
10608	c25129_g1_i1	alpha 2 macroglobulin	229	20	9.05629e-09	0.685
61986	c48604_g1_i1	alpha 2 macroglobulin	269	18	8.02224e-16	0.6783
66596	c54539_g1_i1	alpha 2 macroglobulin	228	20	3.78661e-26	0.802
659	c1589_g1_i1	alpha 2-macroglobulin	235	10	2.54415e-12	0.596
809	c1982_g1_i1	alpha 2-macroglobulin	241	17	6.50041e-22	0.6929
9052	c21817_g1_i1	alpha 2-macroglobulin	526	20	8.31507e-40	0.625
9054	c21817_g1_i3	alpha 2-macroglobulin	461	20	5.7443e-26	0.6435
11350	c26486_g1_i1	alpha 2-macroglobulin	244	20	1.981e-21	0.7085
13303	c29766_g1_i1	alpha 2-macroglobulin	248	20	6.31447e-26	0.7435
16135	c33528_g1_i1	alpha 2-macroglobulin	409	20	2.57873e-31	0.7805
16136	c33528_g1_i2	alpha 2-macroglobulin	297	20	1.31759e-21	0.835
21949	c38588_g1_i5	alpha 2-macroglobulin	423	20	1.37623e-36	0.6135
24029	c39786_g1_i1	alpha 2-macroglobulin	678	20	7.50202e-73	0.7775
24030	c39786_g1_i2	alpha 2-macroglobulin	301	20	6.9814e-46	0.7655
24742	c40179_g1_i1	alpha 2-macroglobulin	364	20	6.79479e-59	0.695
24743	c40179_g1_i2	alpha 2-macroglobulin	303	20	4.96979e-30	0.806
24744	c40179_g1_i3	alpha 2-macroglobulin	628	20	2.17601e-81	0.7475
53879	c46097_g2_i1	alpha 2-macroglobulin	379	20	1.35899e-36	0.659
66253	c54125_g1_i1	alpha 2-macroglobulin	210	11	1.37363e-16	0.6991
25907	c40715_g2_i1	alpha beta hydrolase domain-containing protein 14b	331	20	1.05476e-14	0.5935
25909	c40715_g2_i2	alpha beta hydrolase domain-containing protein 14b	235	11	1.63289e-06	0.5836
58252	c46491_g1_i1	alpha cardiac muscle 1	839	20	3.26993e-110	0.9235
26362	c40891_g1_i1	alpha catenin	505	20	1.20316e-45	0.8805
26363	c40891_g1_i2	alpha catenin	654	20	6.81906e-25	0.847
26364	c40891_g1_i3	alpha catenin	762	20	1.20582e-46	0.896
26365	c40891_g1_i4	alpha catenin	761	20	1.20582e-46	0.896
4721	c11060_g1_i2	alpha gamma epsilon	230	20	1.71908e-26	0.905
59094	c46561_g4_i7	alpha isoform a	332	20	5.14613e-30	0.742
4720	c11060_g1_i1	alpha- isoform a	297	20	2.71822e-42	0.9195
46601	c45358_g1_i6	alpha isoform c	394	20	1.20543e-65	0.928
46604	c45358_g1_i9	alpha isoform c	524	20	2.83302e-79	0.947
1320	c3217_g1_i1	alpha- -mannosyl-glycoprotein 2-beta-n-acetylglucosaminyltransferase-like	259	20	3.85997e-28	0.8795
54172	c46128_g1_i1	alpha- -mannosyl-glycoprotein 2-beta-n-acetylglucosaminyltransferase-like	252	8	3.58499e-07	0.7638
54174	c46128_g1_i3	alpha- -mannosyl-glycoprotein 2-beta-n-acetylglucosaminyltransferase-like	245	20	2.34129e-13	0.5895
54176	c46128_g1_i5	alpha- -mannosyl-glycoprotein 2-beta-n-acetylglucosaminyltransferase-like	333	20	5.82088e-24	0.645
63410	c50437_g1_i1	alpha- -mannosyl-glycoprotein 2-beta-n-acetylglucosaminyltransferase-like	201	20	1.85755e-21	0.783
43178	c44951_g1_i10	alpha methylacyl-	275	20	6.62126e-26	0.8345
20418	c37539_g1_i2	alpha- partial	238	20	6.30829e-45	0.984
21427	c38233_g1_i1	alpha- partial	210	20	9.02056e-26	0.901
21428	c38233_g1_i2	alpha- partial	340	20	3.11753e-49	0.87
50120	c45736_g1_i2	alpha- partial	223	20	5.24322e-16	0.944
57503	c46425_g1_i7	alpha- sarcomeric	288	20	2.45437e-25	0.958
57504	c46425_g1_i8	alpha- sarcomeric	261	20	3.21186e-35	0.9435
57505	c46425_g1_i9	alpha- sarcomeric	2770	20	0	0.848
57497	c46425_g1_i1	alpha- sarcomeric-like	511	20	1.9561e-69	0.8
57500	c46425_g1_i4	alpha- sarcomeric-like	1243	20	9.98638e-117	0.782
57501	c46425_g1_i5	alpha- sarcomeric-like	364	20	5.75397e-34	0.7255
57502	c46425_g1_i6	alpha- sarcomeric-like	691	20	1.27469e-100	0.809
57499	c46425_g1_i3	alpha- sarcomeric-like isoform x2	1121	20	5.36459e-147	0.8495
33446	c43245_g2_i2	alpha tocopherol transfer protein	1165	20	1.41019e-75	0.6925
1766	c4168_g1_i1	alpha tubulin	251	20	7.05283e-36	0.9225
42231	c44826_g1_i1	alpha tubulin	227	20	3.04703e-28	0.997
56713	c46358_g1_i3	alpha tubulin	1275	20	0	0.9265
43083	c44940_g2_i2	alpha-( )-fucosyltransferase	418	20	5.74557e-10	0.483
50809	c45800_g1_i1	alpha-( )-fucosyltransferase	563	8	1.11939e-06	0.55
57650	c46438_g1_i2	alpha-( )-fucosyltransferase	1233	20	2.49532e-76	0.636
57651	c46438_g1_i3	alpha-( )-fucosyltransferase	233	20	8.81477e-11	0.7255
57654	c46438_g1_i5	alpha-( )-fucosyltransferase	692	20	1.77643e-78	0.699
57655	c46438_g1_i6	alpha-( )-fucosyltransferase	228	20	1.36893e-16	0.6055
57658	c46438_g1_i9	alpha-( )-fucosyltransferase	243	20	2.10196e-18	0.605
53569	c46068_g3_i3	alpha-( )-fucosyltransferase c	443	20	1.17349e-13	0.5845
45744	c45263_g4_i1	alpha-( )-fucosyltransferase c-like	280	18	2.33343e-11	0.6361
50499	c45771_g1_i2	alpha-( )-fucosyltransferase c-like	608	20	6.49493e-30	0.6505
50503	c45771_g1_i6	alpha-( )-fucosyltransferase c-like	597	20	7.47924e-20	0.6185
50504	c45771_g1_i7	alpha-( )-fucosyltransferase c-like	515	20	2.54148e-30	0.6505
50505	c45771_g1_i8	alpha-( )-fucosyltransferase c-like	266	20	1.50929e-19	0.726
53567	c46068_g3_i1	alpha-( )-fucosyltransferase c-like	745	20	2.1842e-55	0.6465
878	c2151_g1_i1	alpha-( )-fucosyltransferase isoform x2	234	20	3.02945e-27	0.7905
57649	c46438_g1_i1	alpha-( )-fucosyltransferase isoform x2	614	20	3.50712e-77	0.726
57656	c46438_g1_i7	alpha-( )-fucosyltransferase- partial	232	20	2.54638e-18	0.7425
57657	c46438_g1_i8	alpha-( )-fucosyltransferase- partial	279	20	4.13948e-17	0.7245
57659	c46438_g1_i10	alpha-( )-fucosyltransferase- partial	232	20	2.3989e-19	0.715
25934	c40725_g1_i1	alpha-( )-fucosyltransferase-like	204	20	4.64334e-08	0.6605
57653	c46438_g1_i4	alpha-( )-fucosyltransferase-like isoform x1	1066	20	7.07124e-88	0.66
26239	c40842_g1_i1	alpha-1b- receptor-like	257	1	3.56968e-06	0.55
33423	c43238_g1_i1	alpha2 macroglobulin isoform 2	282	20	4.08593e-14	0.706
33425	c43238_g1_i2	alpha2 macroglobulin isoform 2	452	20	4.83918e-37	0.753
8082	c19527_g1_i1	alpha-2-macroglobulin 2 isoform 1	293	7	2.63363e-16	0.6486
8083	c19527_g1_i2	alpha-2-macroglobulin 2 isoform 1	227	4	9.06806e-14	0.7975
2888	c6859_g1_i1	alpha-2-macroglobulin 2 isoform 2	284	7	1.11098e-23	0.6786
19061	c36439_g1_i1	alpha-2-macroglobulin 2 isoform 2	405	5	4.92185e-34	0.708
42845	c44899_g1_i1	alpha-2-macroglobulin receptor-associated	450	20	1.38815e-14	0.692
42848	c44899_g1_i4	alpha-2-macroglobulin receptor-associated	889	20	1.03611e-52	0.655
14635	c31782_g1_i2	alpha-2-macroglobulin receptor-associated protein	512	8	1.42767e-09	0.61
42846	c44899_g1_i2	alpha-2-macroglobulin receptor-associated protein	543	20	1.56844e-42	0.6585
42847	c44899_g1_i3	alpha-2-macroglobulin receptor-associated protein	624	20	2.16305e-43	0.6555
42849	c44899_g1_i5	alpha-2-macroglobulin receptor-associated protein	346	20	8.1567e-23	0.6145
4073	c9583_g1_i1	alpha-adaptin	325	20	3.15306e-27	0.969
5460	c12803_g1_i1	alpha-adaptin	244	20	4.72967e-41	0.959
43288	c44963_g1_i1	alpha-aminoadipic semialdehyde dehydrogenase	217	20	1.17417e-25	0.938
43291	c44963_g1_i3	alpha-aminoadipic semialdehyde dehydrogenase	396	20	2.21876e-40	0.7995
43293	c44963_g1_i5	alpha-aminoadipic semialdehyde dehydrogenase	271	20	3.91347e-25	0.938
43294	c44963_g1_i6	alpha-aminoadipic semialdehyde dehydrogenase	315	20	1.27874e-38	0.7935
45770	c45269_g2_i1	alpha-aminoadipic semialdehyde dehydrogenase	353	20	1.21548e-55	0.9655
45771	c45269_g2_i2	alpha-aminoadipic semialdehyde dehydrogenase	211	20	2.53178e-17	0.991
45773	c45269_g2_i3	alpha-aminoadipic semialdehyde dehydrogenase	323	20	8.17675e-56	0.9655
45774	c45269_g2_i4	alpha-aminoadipic semialdehyde dehydrogenase	328	20	1.58239e-44	0.9695
45775	c45269_g1_i2	alpha-aminoadipic semialdehyde dehydrogenase	294	20	1.42929e-28	0.786
45776	c45269_g1_i3	alpha-aminoadipic semialdehyde dehydrogenase	426	20	4.70862e-55	0.785
43299	c44963_g1_i8	alpha-aminoadipic semialdehyde dehydrogenase isoform x1	369	20	2.51321e-38	0.7985
43289	c44963_g1_i2	alpha-aminoadipic semialdehyde dehydrogenase-like	349	20	5.37029e-36	0.926
45769	c45269_g1_i1	alpha-aminoadipic semialdehyde dehydrogenase-like	217	20	9.83077e-24	0.8095
2341	c5516_g1_i1	alpha-aminoadipic semialdehyde mitochondrial-like	218	20	2.62011e-25	0.889
2459	c5780_g1_i1	alpha-aminoadipic semialdehyde mitochondrial-like	203	20	2.02349e-09	0.636
10269	c24423_g1_i1	alpha-aminoadipic semialdehyde mitochondrial-like	354	20	5.64784e-41	0.817
17019	c34528_g1_i1	alpha-aminoadipic semialdehyde mitochondrial-like	347	20	3.80375e-22	0.815
19123	c36488_g1_i1	alpha-aminoadipic semialdehyde mitochondrial-like	201	20	6.56659e-08	0.8375
47308	c45437_g1_i1	alpha-amylase	352	20	8.23505e-19	0.7745
45418	c45226_g3_i1	alpha-amylase 1 precursor	2010	20	0	0.769
17091	c34600_g1_i2	alpha-aspartyl dipeptidase	387	20	1.02559e-28	0.8395
17092	c34600_g1_i3	alpha-aspartyl dipeptidase	489	20	5.05724e-43	0.881
17090	c34600_g1_i1	alpha-aspartyl dipeptidase-like	494	20	1.28947e-39	0.8805
41016	c44658_g1_i2	alpha-carbonic anhydrase	679	20	4.75311e-125	0.657
23909	c39707_g1_i2	alpha-enolase isoform x3	283	20	1.13303e-21	0.931
28922	c41897_g1_i1	alpha-galactosidase alpha-n-acetylgalactosaminidase	281	20	3.0665e-32	0.871
28923	c41897_g1_i2	alpha-galactosidase alpha-n-acetylgalactosaminidase	309	20	1.7751e-49	0.8945
28924	c41897_g1_i3	alpha-galactosidase alpha-n-acetylgalactosaminidase	449	20	1.49515e-79	0.86
36993	c44008_g1_i1	alpha-galactosidase alpha-n-acetylgalactosaminidase	1390	20	3.00614e-135	0.836
38207	c44221_g1_i2	alpha-galactosidase alpha-n-acetylgalactosaminidase	251	20	7.78002e-19	0.7465
38209	c44221_g1_i4	alpha-galactosidase alpha-n-acetylgalactosaminidase	470	20	4.66842e-17	0.7365
37146	c44038_g1_i3	alpha-glucosidase	220	20	2.28926e-20	0.8295
44064	c45066_g2_i1	alpha-glucosidase	1449	20	2.58918e-84	0.669
44066	c45066_g2_i3	alpha-glucosidase	1406	20	2.48082e-84	0.669
44067	c45066_g2_i4	alpha-glucosidase	812	20	3.90979e-69	0.669
44069	c45066_g2_i5	alpha-glucosidase	1333	20	2.29501e-84	0.669
44070	c45066_g2_i6	alpha-glucosidase	1191	20	1.95776e-84	0.669
56343	c46325_g1_i1	alpha-glucosidase	1128	20	2.37548e-43	0.5715
56347	c46325_g1_i3	alpha-glucosidase	463	20	3.63909e-12	0.7795
56348	c46325_g1_i4	alpha-glucosidase	912	20	1.57739e-22	0.591
56349	c46325_g1_i5	alpha-glucosidase	1175	20	5.88892e-40	0.581
56351	c46325_g1_i7	alpha-glucosidase	678	20	7.16158e-14	0.7655
60329	c46669_g1_i7	alpha-glucosidase	2826	20	2.63471e-40	0.5195
157	c338_g1_i1	alpha-glucosidase ii	236	3	3.97227e-06	0.7333
56344	c46325_g1_i2	alpha-glucosidase yihq	1069	20	1.86192e-40	0.551
20417	c37539_g1_i1	alpha-i tubulin	386	20	6.17798e-57	0.988
40927	c44640_g1_i2	alpha-i tubulin	969	20	0	0.977
60792	c47065_g1_i1	alpha-ketoglutarate-dependent dioxygenase alkb homolog 6	324	20	3.09418e-17	0.7625
9145	c22029_g1_i2	alpha-mannosidase 2	345	20	3.29638e-32	0.777
17103	c34608_g1_i3	alpha-mannosidase 2	304	20	9.69302e-27	0.7335
37654	c44130_g2_i1	alpha-mannosidase 2	257	20	4.04942e-17	0.6215
59832	c46624_g2_i1	alpha-mannosidase 2c1	1000	20	4.84374e-100	0.769
59833	c46624_g3_i1	alpha-mannosidase 2c1	395	20	1.32475e-30	0.588
59834	c46624_g3_i2	alpha-mannosidase 2c1	823	20	7.1265e-49	0.5825
59835	c46624_g2_i2	alpha-mannosidase 2c1	557	20	4.90654e-73	0.7665
59836	c46624_g2_i3	alpha-mannosidase 2c1	1041	20	2.08647e-105	0.7695
59837	c46624_g2_i4	alpha-mannosidase 2c1	1169	20	6.92993e-106	0.773
60852	c47136_g1_i1	alpha-mannosidase 2c1	291	20	5.22703e-15	0.595
62624	c49430_g1_i1	alpha-mannosidase 2c1 isoform x1	242	20	5.94765e-11	0.6145
2508	c5903_g1_i1	alpha-mannosidase 2c1-like	207	20	1.56751e-20	0.819
3563	c8274_g1_i1	alpha-mannosidase 2c1-like	230	5	3.77602e-09	0.618
49735	c45697_g2_i1	alpha-mannosidase 2c1-like	232	20	1.12409e-26	0.8295
49739	c45697_g2_i3	alpha-mannosidase 2c1-like	1955	20	2.7103e-100	0.591
62732	c49586_g1_i1	alpha-mannosidase 2c1-like	206	6	3.41936e-09	0.77
21853	c38514_g1_i1	alpha-mannosidase 2-like	448	20	1.32775e-34	0.8625
21855	c38514_g1_i3	alpha-mannosidase 2-like	377	20	5.63424e-35	0.8625
61516	c47998_g1_i1	alpha-mannosidase 2-like	284	20	4.50722e-15	0.76
9144	c22029_g1_i1	alpha-mannosidase 2x	230	20	3.70104e-12	0.756
17101	c34608_g1_i1	alpha-mannosidase 2x	419	20	2.23219e-31	0.759
17102	c34608_g1_i2	alpha-mannosidase 2x	452	20	1.3603e-42	0.765
20913	c37845_g1_i1	alpha-mannosidase 2x isoform x4	529	20	2.01543e-51	0.7515
20914	c37845_g1_i2	alpha-mannosidase 2x isoform x4	577	20	6.8631e-51	0.7525
47653	c45475_g2_i2	alpha-mannosidase 2x-like	370	20	1.42512e-16	0.545
34684	c43536_g2_i1	alpha-methylacyl- racemase	409	20	2.23916e-18	0.681
34688	c43536_g2_i5	alpha-methylacyl- racemase	519	20	3.92952e-15	0.6255
37931	c44175_g1_i1	alpha-methylacyl- racemase	497	20	1.70771e-60	0.8275
37932	c44175_g1_i2	alpha-methylacyl- racemase	432	20	6.30299e-46	0.852
37933	c44175_g1_i3	alpha-methylacyl- racemase	648	20	6.19629e-61	0.813
37934	c44175_g1_i4	alpha-methylacyl- racemase	856	20	2.61186e-89	0.8165
37935	c44175_g1_i5	alpha-methylacyl- racemase-like	322	20	7.43681e-40	0.8525
37936	c44175_g1_i6	alpha-methylacyl- racemase-like	793	20	1.32412e-89	0.813
34687	c43536_g2_i4	alpha-methylacyl- racemase-like isoform 1	248	2	5.9914e-06	0.69
34689	c43536_g2_i6	alpha-methylacyl- racemase-like isoform 2	283	2	7.89039e-06	0.69
28925	c41897_g1_i4	alpha-n-acetylgalactosaminidase-like	536	20	1.56668e-94	0.833
32461	c42985_g1_i1	alpha-n-acetylglucosaminidase	247	20	4.17773e-17	0.783
32462	c42985_g1_i2	alpha-n-acetylglucosaminidase	285	20	1.72179e-32	0.7615
42657	c44879_g2_i1	alpha-n-acetylglucosaminidase	328	20	1.46385e-26	0.64
42658	c44879_g2_i2	alpha-n-acetylglucosaminidase	294	20	2.87894e-23	0.65
42659	c44879_g2_i3	alpha-n-acetylglucosaminidase	409	20	3.17984e-29	0.63
42661	c44879_g2_i4	alpha-n-acetylglucosaminidase	476	20	6.39874e-29	0.635
52117	c45930_g3_i2	alpha-n-acetylglucosaminidase	311	20	5.2125e-17	0.759
52120	c45930_g3_i3	alpha-n-acetylglucosaminidase	340	20	2.8534e-28	0.7515
36003	c43811_g3_i1	alpha-n-acetylglucosaminidase- partial	468	20	5.81e-48	0.707
36013	c43811_g3_i2	alpha-n-acetylglucosaminidase-like	719	20	2.00155e-47	0.6765
52019	c45921_g1_i1	alpha-n-acetylglucosaminidase-like	847	20	1.76544e-17	0.6115
52021	c45921_g1_i2	alpha-n-acetylglucosaminidase-like	773	20	8.51463e-18	0.6065
52024	c45921_g1_i5	alpha-n-acetylglucosaminidase-like	945	20	6.65641e-32	0.591
52122	c45930_g3_i4	alpha-n-acetylglucosaminidase-like	287	20	2.54297e-27	0.737
58239	c46489_g1_i7	alpha-spectrin	217	20	4.15012e-19	0.9405
59087	c46561_g4_i2	alpha-spectrin	292	20	7.56341e-41	0.921
59093	c46561_g4_i6	alpha-spectrin	302	20	2.16158e-50	0.8975
13467	c30035_g1_i1	alpha-tocopherol transfer	297	18	7.43369e-11	0.58
15244	c32459_g1_i1	alpha-tocopherol transfer	298	20	1.7481e-10	0.556
37788	c44153_g1_i1	alpha-tocopherol transfer	450	20	1.77001e-19	0.6885
37790	c44153_g1_i3	alpha-tocopherol transfer	752	20	5.34067e-21	0.5655
37791	c44153_g1_i4	alpha-tocopherol transfer	625	20	3.45745e-20	0.6715
37793	c44153_g1_i6	alpha-tocopherol transfer	777	20	2.74518e-29	0.681
60486	c46692_g1_i1	alpha-tocopherol transfer	303	20	1.10179e-11	0.536
57587	c46432_g1_i1	alpha-tocopherol transfer isoform x1	1774	20	7.1984e-53	0.5765
57588	c46432_g1_i2	alpha-tocopherol transfer isoform x1	1502	20	5.7846e-53	0.5765
57589	c46432_g1_i3	alpha-tocopherol transfer isoform x1	1853	20	1.43229e-51	0.577
57592	c46432_g1_i6	alpha-tocopherol transfer isoform x1	622	20	1.66985e-23	0.6995
57595	c46432_g1_i8	alpha-tocopherol transfer isoform x1	670	20	3.31792e-28	0.7005
56719	c46358_g1_i9	alpha-tubulin	362	20	1.92539e-69	0.9415
29320	c42031_g1_i3	alternative splicing factor srp55 b52	611	20	4.94483e-22	0.9025
7751	c18828_g1_i1	amidohydrolase 2	551	20	3.15203e-37	0.6395
1216	c3021_g1_i1	amidophosphoribosyltransferase	293	20	2.51931e-29	0.7195
64808	c52232_g1_i1	amidophosphoribosyltransferase-like isoform x1	204	20	2.29311e-16	0.9295
21596	c38345_g1_i1	amine oxidase	604	20	1.84364e-12	0.698
21599	c38345_g1_i4	amine oxidase	622	20	1.08918e-14	0.6845
21600	c38345_g1_i5	amine oxidase	343	20	6.5691e-16	0.701
28941	c41904_g2_i1	amine oxidase	526	20	1.87767e-43	0.6595
28943	c41904_g2_i3	amine oxidase	446	20	1.45951e-28	0.6735
29668	c42151_g1_i2	amine oxidase	667	20	1.98283e-29	0.578
29670	c42151_g1_i4	amine oxidase	663	20	2.14501e-29	0.578
65952	c53697_g1_i1	amine oxidase	216	20	1.63786e-18	0.6955
52732	c45986_g1_i4	amino acid transporter	241	20	3.37337e-12	0.71
52728	c45986_g2_i1	amino acid transporter domain containing protein	459	20	1.73486e-23	0.5775
52731	c45986_g2_i2	amino acid transporter domain containing protein	534	20	4.36563e-28	0.616
32436	c42976_g1_i1	aminoacyl trna synthase complex-interacting multifunctional protein 1-like	465	20	1.32021e-60	0.8315
32437	c42976_g1_i2	aminoacyl trna synthase complex-interacting multifunctional protein 1-like	275	20	2.51822e-40	0.858
32438	c42976_g1_i3	aminoacyl trna synthase complex-interacting multifunctional protein 1-like	504	20	1.05789e-71	0.846
32439	c42976_g1_i4	aminoacyl trna synthase complex-interacting multifunctional protein 1-like	297	20	1.62623e-36	0.817
32440	c42976_g1_i5	aminoacyl trna synthase complex-interacting multifunctional protein 1-like	305	20	2.61017e-46	0.86
47159	c45421_g1_i1	aminoacyl trna synthase complex-interacting multifunctional protein 2	1301	20	7.94676e-29	0.502
56797	c46365_g1_i1	aminoacylase-1	1306	20	1.5608e-129	0.745
6133	c14534_g1_i1	aminoacylase-1 isoform 5	330	20	3.71858e-12	0.791
16548	c33965_g1_i1	aminoacylase-1 isoform x1	436	20	2.52119e-40	0.7645
56798	c46365_g1_i2	aminoacylase-1 isoform x1	569	20	8.22282e-50	0.765
61735	c48288_g1_i1	aminoacylase-1 isoform x1	209	20	5.18776e-22	0.7675
56799	c46365_g1_i3	aminoacylase-1 isoform x2	1170	20	6.47793e-129	0.7445
56801	c46365_g2_i2	aminoacylase-1 isoform x4	1086	20	4.31645e-86	0.722
56802	c46365_g2_i3	aminoacylase-1 isoform x4	1227	20	1.92695e-85	0.722
12367	c28047_g1_i1	aminoacylase-1a-like	268	20	2.1371e-22	0.716
35539	c43726_g1_i1	aminoacylase-1a-like	547	20	3.20582e-22	0.7945
35541	c43726_g1_i3	aminoacylase-1a-like	446	20	1.19683e-22	0.7945
35542	c43726_g1_i4	aminoacylase-1a-like	334	20	1.30956e-22	0.789
34571	c43505_g1_i1	aminoacylase-1a-like isoform x4	246	20	2.94047e-11	0.7435
40716	c44607_g1_i1	aminoacylase-1a-like isoform x4	243	20	3.25078e-26	0.756
40717	c44607_g1_i2	aminoacylase-1a-like isoform x4	220	20	2.2564e-22	0.7465
66077	c53883_g1_i1	aminoglycoside phosphotransferase domain-containing protein 1	233	20	8.8082e-15	0.6455
52871	c46000_g1_i1	aminopeptidase -like	1861	20	3.3035e-161	0.8075
52872	c46000_g1_i2	aminopeptidase -like	376	20	9.71828e-59	0.842
52873	c46000_g1_i3	aminopeptidase -like	664	20	3.21317e-86	0.816
28135	c41615_g1_i1	aminopeptidase n	249	20	1.69893e-07	0.8095
28136	c41615_g1_i2	aminopeptidase n	321	20	2.03543e-36	0.7605
28138	c41615_g1_i4	aminopeptidase n	343	20	3.95613e-34	0.787
47702	c45481_g1_i1	aminopeptidase n	461	20	1.01113e-15	0.5775
47703	c45481_g1_i2	aminopeptidase n	452	20	3.76789e-15	0.5585
47708	c45481_g1_i7	aminopeptidase n	493	20	6.2454e-19	0.6045
47709	c45481_g1_i8	aminopeptidase n	513	20	4.34966e-23	0.62
55810	c46280_g1_i1	aminopeptidase n	520	20	3.07362e-41	0.629
55811	c46280_g1_i2	aminopeptidase n	521	20	1.32603e-31	0.626
55812	c46280_g1_i3	aminopeptidase n	2851	20	0	0.629
55813	c46280_g1_i4	aminopeptidase n	703	20	2.53565e-70	0.6415
47705	c45481_g1_i4	aminopeptidase n-like	241	20	5.90456e-14	0.7275
47706	c45481_g1_i5	aminopeptidase n-like	304	20	5.45127e-16	0.711
47707	c45481_g1_i6	aminopeptidase n-like	213	20	4.28061e-14	0.6955
30294	c42352_g2_i1	amoeboid myosin i	252	20	9.09632e-31	0.743
30295	c42352_g2_i2	amoeboid myosin i	226	20	2.35211e-25	0.745
46565	c45354_g2_i1	amp dependent	398	20	1.9571e-21	0.662
46569	c45354_g2_i3	amp dependent	473	20	1.528e-21	0.657
16995	c34499_g1_i1	amp dependent coa ligase	354	20	2.13555e-18	0.57
21535	c38301_g1_i1	amp dependent coa ligase	440	20	3.12384e-20	0.563
40884	c44634_g2_i1	amp dependent coa ligase	738	20	1.475e-53	0.741
40885	c44634_g2_i2	amp dependent coa ligase	731	20	2.12161e-50	0.7355
40886	c44634_g2_i3	amp dependent coa ligase	731	20	1.46145e-50	0.7355
56047	c46298_g1_i2	amp dependent coa ligase	225	3	7.16802e-07	0.62
56049	c46298_g1_i4	amp dependent coa ligase	1765	20	1.80581e-96	0.6165
56050	c46298_g1_i5	amp dependent coa ligase	1195	20	1.19283e-43	0.5455
56051	c46298_g1_i6	amp dependent coa ligase	695	20	3.08787e-33	0.521
56053	c46298_g1_i7	amp dependent coa ligase	1704	20	5.1382e-94	0.627
56054	c46298_g1_i8	amp dependent coa ligase	278	12	2.62213e-10	0.5475
3288	c7675_g1_i1	amp dependent ligase	339	20	1.0477e-18	0.684
34919	c43595_g1_i2	amp dependent ligase	541	2	1.49565e-06	0.495
65577	c53217_g1_i1	amp dependent ligase	283	20	1.77766e-39	0.7985
55762	c46275_g1_i5	amp-activated protein kinase gamma subunit	326	20	1.409e-51	0.8755
44464	c45113_g3_i1	amp-binding enzyme family protein	243	20	2.54932e-15	0.687
31774	c42802_g1_i1	amp-binding protein	644	20	4.82248e-23	0.614
31777	c42802_g1_i4	amp-binding protein	400	20	1.94956e-07	0.598
31779	c42802_g1_i6	amp-binding protein	688	20	4.93911e-23	0.615
31782	c42802_g1_i9	amp-binding protein	790	20	1.02686e-22	0.615
44465	c45113_g3_i2	amp-binding protein	224	20	2.11087e-17	0.6925
44466	c45113_g3_i3	amp-binding protein	222	20	1.43468e-13	0.697
44469	c45113_g3_i4	amp-binding protein	269	20	7.53436e-23	0.6915
47312	c45438_g2_i1	amp-binding protein	206	20	6.14387e-17	0.786
47313	c45438_g1_i3	amp-binding protein	231	20	8.84668e-12	0.6685
54365	c46146_g1_i7	amp-dependent synthetase	971	20	5.92639e-15	0.4615
56045	c46298_g1_i1	amp-dependent synthetase	550	20	9.68947e-14	0.514
53008	c46014_g1_i5	amphicasp-3 7-like	679	20	1.5929e-15	0.497
50366	c45759_g2_i2	amphiphysin-like isoform 2	223	20	3.92551e-22	0.732
2664	c6313_g1_i1	amphoterin-induced protein 1-like	513	11	6.58438e-09	0.5
2665	c6313_g1_i2	amphoterin-induced protein 1-like	385	12	4.31024e-09	0.5317
55764	c46275_g1_i7	ampk-gamma subunit	426	20	5.20017e-12	0.6915
10086	c24026_g1_i1	amsh-like protease	224	20	4.41429e-11	0.642
46663	c45365_g1_i1	amylo- 6- 4-alpha-glucanotransferase isoform 1	673	20	5.45934e-48	0.6165
46665	c45365_g1_i3	amylo- 6- 4-alpha-glucanotransferase isoform 1	701	20	5.94693e-48	0.6165
23425	c39426_g1_i1	amyloid beta a4 precursor protein -binding	451	20	1.11293e-83	0.897
23426	c39426_g1_i2	amyloid beta a4 precursor protein -binding	297	20	7.87321e-46	0.904
23427	c39426_g1_i3	amyloid beta a4 precursor protein -binding	447	20	1.6664e-83	0.9165
21164	c38038_g1_i2	amyrel	298	20	5.52848e-39	0.7995
6547	c15772_g1_i1	an1-type zinc finger protein 1	323	20	5.6592e-19	0.576
60247	c46664_g1_i2	an1-type zinc finger protein 5-like	439	20	4.24026e-24	0.909
60248	c46664_g1_i3	an1-type zinc finger protein 5-like	290	20	6.92602e-28	0.902
33889	c43344_g1_i4	anamorsin	294	20	1.24703e-14	0.6285
33891	c43344_g1_i6	anamorsin	301	20	3.19889e-12	0.6525
28615	c41794_g1_i1	anamorsin homolog	362	20	4.17723e-15	0.662
28616	c41794_g1_i2	anamorsin homolog	341	20	7.3288e-15	0.658
33885	c43344_g1_i1	anamorsin isoform x2	278	20	2.91086e-12	0.676
63862	c51017_g1_i1	anaphase-promoting complex subunit 1	226	20	9.38923e-22	0.8395
5707	c13409_g1_i1	anaphase-promoting complex subunit 11-like	333	20	2.40019e-47	0.913
6255	c14886_g1_i1	anaphase-promoting complex subunit 13	302	20	4.45182e-12	0.7215
6256	c14886_g1_i2	anaphase-promoting complex subunit 13	284	20	3.7371e-12	0.7215
65154	c52706_g1_i1	anaphase-promoting complex subunit 4-like	203	20	3.01587e-16	0.7575
2706	c6406_g1_i1	anaphase-promoting complex subunit 5 isoform 2	243	20	9.00899e-20	0.7325
17003	c34510_g1_i1	anaphase-promoting complex subunit 5 isoform 2	222	20	1.11467e-08	0.644
2707	c6406_g1_i2	anaphase-promoting complex subunit 5-like	229	20	4.27743e-17	0.7585
11370	c26523_g1_i1	anaphase-promoting complex subunit 5-like	340	20	1.51978e-16	0.5225
66732	c54717_g1_i1	anaphase-promoting complex subunit 7-like	228	20	6.24006e-27	0.7635
7223	c17657_g1_i2	ancient ubiquitous	315	5	3.85795e-11	0.71
39141	c44378_g1_i1	ancient ubiquitous protein 1	330	20	2.50615e-25	0.6395
39143	c44378_g1_i3	ancient ubiquitous protein 1	347	20	3.58242e-28	0.592
39144	c44378_g1_i4	ancient ubiquitous protein 1	286	20	4.6324e-22	0.6075
39145	c44378_g1_i5	ancient ubiquitous protein 1	270	20	9.69141e-20	0.587
46369	c45334_g3_i1	ancient ubiquitous protein 1	341	8	4.78069e-09	0.5513
46377	c45334_g3_i2	ancient ubiquitous protein 1	462	20	5.26265e-15	0.533
39142	c44378_g1_i2	ancient ubiquitous protein 1-like	459	20	1.48437e-40	0.606
12437	c28247_g1_i1	and ph domain-containing protein 6	414	20	1.36723e-39	0.6915
31166	c42630_g1_i1	and ph domain-containing protein 6	466	20	1.09689e-23	0.594
31167	c42630_g1_i2	and ph domain-containing protein 6	444	20	1.89588e-26	0.6185
31168	c42630_g1_i3	and ph domain-containing protein 6	381	20	6.38034e-17	0.613
31169	c42630_g1_i4	and ph domain-containing protein 6	469	20	2.12666e-24	0.6045
14249	c31223_g1_i1	and ph domain-containing protein 6-like	351	20	6.58081e-22	0.6485
14250	c31223_g1_i2	and ph domain-containing protein 6-like	331	20	1.87551e-19	0.6435
15917	c33225_g1_i1	and ph domain-containing protein 6-like	303	20	1.76488e-17	0.6745
15918	c33225_g1_i2	and ph domain-containing protein 6-like	272	20	1.0021e-18	0.6815
61595	c48109_g1_i1	and pleckstrin domain-containing	206	20	5.16813e-32	0.935
64378	c51660_g1_i1	and pleckstrin domain-containing	421	20	6.29913e-64	0.7865
3295	c7689_g1_i1	and pleckstrin domain-containing protein 1 isoform x2	212	20	1.48852e-23	0.8335
353	c842_g1_i1	and pleckstrin domain-containing protein 2	203	20	9.37738e-37	0.927
3296	c7689_g1_i2	and pleckstrin domain-containing protein 2	207	20	3.63556e-22	0.8255
11402	c26564_g1_i2	androgen induced inhibitor of proliferation pds5	536	20	9.54693e-54	0.711
16042	c33382_g1_i1	androgen induced inhibitor of proliferation pds5	643	20	2.06822e-108	0.914
16043	c33382_g1_i2	androgen induced inhibitor of proliferation pds5	444	20	3.85599e-74	0.9115
16044	c33382_g1_i3	androgen induced inhibitor of proliferation pds5	669	20	3.47608e-108	0.914
16045	c33382_g1_i4	androgen induced inhibitor of proliferation pds5	378	20	4.90481e-54	0.6855
59527	c46598_g2_i7	androgen induced inhibitor of proliferation pds5	251	20	3.87549e-23	0.925
59531	c46598_g2_i11	androgen induced inhibitor of proliferation pds5	1660	20	6.56187e-21	0.641
60815	c47089_g2_i1	androgen induced inhibitor of proliferation pds5	338	20	1.33334e-33	0.7825
64769	c52179_g1_i1	androgen-dependent tfpi-regulating protein	242	20	2.48082e-11	0.592
6342	c15161_g1_i1	androgen-induced inhibitor of proliferation-like protein	259	20	6.23052e-25	0.8395
6343	c15161_g1_i2	androgen-induced inhibitor of proliferation-like protein	312	20	3.40742e-46	0.8475
8820	c21298_g1_i1	angio-associated migratory cell	528	20	1.63547e-53	0.6685
21881	c38542_g1_i1	angio-associated migratory cell	273	20	3.9148e-14	0.5855
1896	c4412_g1_i2	angiogenic factor with g patch and fha domains 1-like	412	20	1.31431e-18	0.556
60585	c46808_g1_i1	angiopoietin-related protein 2	296	20	2.6471e-17	0.717
12300	c27915_g1_i1	angiopoietin-related protein 4	598	20	5.04108e-18	0.555
53360	c46045_g1_i2	angiopoietin-related protein 4 isoform 1	258	20	1.37356e-30	0.6475
48741	c45590_g1_i4	angiotensin converting partial	258	20	2.2358e-07	0.641
39738	c44468_g1_i1	angiotensin-converting enzyme	500	20	3.58936e-28	0.63
39740	c44468_g1_i3	angiotensin-converting enzyme	460	20	1.58649e-28	0.63
39741	c44468_g1_i4	angiotensin-converting enzyme	463	20	1.31688e-28	0.632
39739	c44468_g1_i2	angiotensin-converting enzyme-like	352	20	9.77893e-31	0.6415
46333	c45330_g1_i1	angiotensin-converting enzyme-like	1195	20	7.20299e-77	0.553
46335	c45330_g3_i1	angiotensin-converting enzyme-like	1645	20	3.86887e-103	0.7195
21215	c38077_g1_i1	anion exchange	313	20	1.0812e-28	0.7965
36827	c43979_g1_i1	anion exchange	726	20	4.46164e-75	0.726
36828	c43979_g1_i2	anion exchange	637	20	9.12231e-71	0.74
36829	c43979_g1_i3	anion exchange	779	20	2.95088e-75	0.729
36831	c43979_g1_i5	anion exchange	201	20	9.47372e-17	0.785
36832	c43979_g1_i6	anion exchange	685	20	2.66613e-75	0.734
8850	c21367_g1_i1	anion exchange protein	204	1	1.70911e-06	0.67
43751	c45025_g1_i3	anion exchange protein 2	865	20	1.73752e-54	0.728
43752	c45025_g1_i4	anion exchange protein 2	983	20	3.11219e-54	0.7205
43755	c45025_g1_i7	anion exchange protein 2	760	20	2.70906e-54	0.777
43757	c45025_g1_i9	anion exchange protein 2	731	20	3.26625e-54	0.781
43758	c45025_g1_i10	anion exchange protein 2	519	20	3.00455e-20	0.6635
43753	c45025_g1_i5	anion exchange protein slc4a2	630	20	1.08078e-45	0.804
8857	c21397_g1_i1	anion exchange transporter	447	20	1.41925e-18	0.645
51647	c45886_g2_i1	ankyrin domain protein ank2	303	20	3.01277e-11	0.579
51650	c45886_g2_i2	ankyrin domain protein ank2	377	20	1.45113e-11	0.542
51657	c45886_g2_i3	ankyrin domain protein ank2	358	20	1.25515e-10	0.583
43350	c44970_g3_i1	ankyrin homolog le1	213	20	1.65476e-25	0.896
43351	c44970_g3_i2	ankyrin homolog le1	214	20	4.16265e-29	0.881
40044	c44506_g1_i2	ankyrin isoform g	514	20	5.31883e-71	0.7355
36840	c43981_g1_i1	ankyrin isoform n	250	20	2.44386e-14	0.927
21588	c38340_g1_i2	ankyrin repeat	561	20	4.16742e-21	0.548
29844	c42207_g1_i1	ankyrin repeat	907	20	4.83886e-14	0.595
29845	c42207_g1_i2	ankyrin repeat	998	20	1.06546e-17	0.57
44943	c45172_g4_i1	ankyrin repeat	1372	20	1.68667e-23	0.5235
65743	c53427_g1_i1	ankyrin repeat and btb poz domain-containing protein 1	217	20	2.49143e-21	0.7925
63699	c50796_g1_i1	ankyrin repeat and fyve domain-containing protein 1	304	20	7.14746e-13	0.5015
35840	c43785_g1_i2	ankyrin repeat and kh domain-containing protein 1-like isoform x4	316	20	1.72077e-30	0.95
6843	c16521_g1_i1	ankyrin repeat and mynd domain-containing protein 2	244	20	2.01287e-09	0.729
25496	c40527_g1_i1	ankyrin repeat and mynd domain-containing protein 2	360	20	1.78104e-28	0.6675
27113	c41217_g2_i1	ankyrin repeat and mynd domain-containing protein 2-like	240	20	1.36704e-15	0.6475
7102	c17370_g1_i2	ankyrin repeat and sam domain-containing protein 1a-like	253	14	1.03176e-09	0.7429
1693	c4021_g1_i1	ankyrin repeat and sam domain-containing protein 1a-like isoform x1	295	20	8.02474e-27	0.776
1694	c4021_g1_i2	ankyrin repeat and sam domain-containing protein 1a-like isoform x1	334	20	9.82543e-31	0.781
64710	c52094_g1_i1	ankyrin repeat and sam domain-containing protein 3	218	20	1.90777e-09	0.583
4707	c11032_g1_i1	ankyrin repeat and socs box protein 13	260	20	7.05611e-10	0.5345
7101	c17370_g1_i1	ankyrin repeat and sterile alpha motif domain-containing protein 1b	215	20	2.24373e-17	0.7675
60740	c47005_g1_i1	ankyrin repeat and sterile alpha motif domain-containing protein 1b	301	20	1.29678e-15	0.692
17332	c34846_g1_i1	ankyrin repeat and zinc finger domain-containing protein 1	668	20	4.73472e-14	0.5265
17334	c34846_g1_i3	ankyrin repeat and zinc finger domain-containing protein 1	618	20	2.42246e-14	0.526
62753	c49614_g1_i1	ankyrin repeat and zinc finger domain-containing protein 1-like	257	20	2.94997e-25	0.758
63105	c50057_g1_i1	ankyrin repeat and zinc finger domain-containing protein 1-like	241	9	1.5786e-08	0.6122
358	c855_g1_i1	ankyrin repeat containing protein	231	13	7.48065e-15	0.6162
2117	c4919_g1_i1	ankyrin repeat domain protein	287	20	3.17763e-12	0.655
4045	c9517_g1_i1	ankyrin repeat domain protein	499	20	3.05443e-08	0.5295
20502	c37600_g1_i1	ankyrin repeat domain protein	535	20	8.97378e-10	0.5575
20503	c37600_g1_i2	ankyrin repeat domain protein	299	20	1.30513e-10	0.5695
59235	c46573_g1_i7	ankyrin repeat domain protein	1814	20	7.95297e-25	0.54
59237	c46573_g1_i8	ankyrin repeat domain protein	1864	20	2.76089e-23	0.5335
21265	c38116_g1_i1	ankyrin repeat domain-containing	306	20	6.61393e-14	0.794
5928	c14058_g1_i1	ankyrin repeat domain-containing protein 11-like	238	16	6.7906e-09	0.6063
6215	c14766_g1_i1	ankyrin repeat domain-containing protein 12	241	20	1.54157e-19	0.8885
32779	c43073_g1_i2	ankyrin repeat domain-containing protein 13b-like	689	20	3.22778e-70	0.6875
32780	c43073_g1_i3	ankyrin repeat domain-containing protein 13b-like	578	20	3.44428e-62	0.7735
35965	c43806_g2_i4	ankyrin repeat domain-containing protein 13b-like	216	20	1.57936e-22	0.8225
35968	c43806_g2_i7	ankyrin repeat domain-containing protein 13b-like	205	20	9.0952e-14	0.7965
35969	c43806_g3_i1	ankyrin repeat domain-containing protein 13b-like	234	20	1.99873e-32	0.864
35970	c43806_g3_i2	ankyrin repeat domain-containing protein 13b-like	232	20	3.20542e-25	0.866
15729	c33031_g1_i1	ankyrin repeat domain-containing protein 13c	274	20	4.97144e-10	0.761
4452	c10453_g1_i1	ankyrin repeat domain-containing protein 13d-like	210	20	3.69272e-09	0.709
29980	c42256_g1_i1	ankyrin repeat domain-containing protein 17	965	20	4.83843e-128	0.9125
29981	c42256_g1_i2	ankyrin repeat domain-containing protein 17	733	20	1.83261e-98	0.9145
29983	c42256_g1_i4	ankyrin repeat domain-containing protein 17	560	20	1.80754e-69	0.8925
29984	c42256_g1_i5	ankyrin repeat domain-containing protein 17	926	20	1.03585e-127	0.9125
35839	c43785_g1_i1	ankyrin repeat domain-containing protein 17	370	20	3.85018e-37	0.9445
35841	c43785_g1_i3	ankyrin repeat domain-containing protein 17	477	20	1.62222e-61	0.943
35842	c43785_g1_i4	ankyrin repeat domain-containing protein 17	470	20	1.24846e-57	0.941
38200	c44219_g1_i7	ankyrin repeat domain-containing protein 17	999	20	1.2642e-14	0.7545
45614	c45247_g2_i2	ankyrin repeat domain-containing protein 17	432	20	6.21867e-15	0.6595
45616	c45247_g2_i4	ankyrin repeat domain-containing protein 17	308	20	1.10969e-15	0.7
45617	c45247_g2_i5	ankyrin repeat domain-containing protein 17	380	20	6.82369e-15	0.697
51204	c45837_g1_i1	ankyrin repeat domain-containing protein 17	1006	20	1.04697e-42	0.845
51205	c45837_g1_i2	ankyrin repeat domain-containing protein 17	1200	20	2.27733e-87	0.9635
51206	c45837_g1_i3	ankyrin repeat domain-containing protein 17	949	20	6.40045e-43	0.6845
51207	c45837_g1_i4	ankyrin repeat domain-containing protein 17	1259	20	4.90621e-88	0.9565
51208	c45837_g1_i5	ankyrin repeat domain-containing protein 17	317	20	2.95241e-32	0.9375
51209	c45837_g1_i6	ankyrin repeat domain-containing protein 17	359	20	3.05528e-48	0.8335
51210	c45837_g1_i7	ankyrin repeat domain-containing protein 17	1449	20	4.10918e-129	0.937
51211	c45837_g1_i8	ankyrin repeat domain-containing protein 17	770	20	1.17172e-43	0.6845
51212	c45837_g1_i9	ankyrin repeat domain-containing protein 17	486	20	9.64005e-74	0.8635
51213	c45837_g1_i10	ankyrin repeat domain-containing protein 17	1332	20	2.3484e-101	0.9575
51215	c45837_g1_i12	ankyrin repeat domain-containing protein 17	1379	20	2.57419e-117	0.947
51216	c45837_g1_i13	ankyrin repeat domain-containing protein 17	1562	20	8.5851e-143	0.903
51217	c45837_g1_i14	ankyrin repeat domain-containing protein 17	471	20	1.3211e-69	0.855
38198	c44219_g1_i5	ankyrin repeat domain-containing protein 17 isoform x3	1005	20	2.60312e-24	0.765
45615	c45247_g2_i3	ankyrin repeat domain-containing protein 17 isoform x3	296	20	2.18186e-11	0.875
25731	c40633_g1_i2	ankyrin repeat domain-containing protein 50	1532	20	1.55778e-36	0.492
42378	c44845_g2_i1	ankyrin repeat domain-containing protein 50	441	20	2.57485e-14	0.567
42379	c44845_g2_i2	ankyrin repeat domain-containing protein 50	693	20	8.10341e-20	0.525
42380	c44845_g2_i3	ankyrin repeat domain-containing protein 50	742	20	3.24202e-19	0.5235
62141	c48796_g1_i1	ankyrin repeat domain-containing protein 50	246	20	6.6666e-20	0.6775
65221	c52786_g1_i1	ankyrin repeat domain-containing protein 50	206	16	1.02817e-08	0.6281
62044	c48674_g1_i1	ankyrin repeat domain-containing protein 50-like	220	20	3.39156e-23	0.8375
28282	c41660_g1_i2	ankyrin repeat family a protein 2	305	20	1.97732e-08	0.58
30414	c42390_g1_i2	ankyrin repeat family a protein 2 isoform x2	204	20	1.83675e-11	0.687
10173	c24223_g1_i1	ankyrin repeat family a protein 2-like	317	16	2.64719e-11	0.6263
10174	c24223_g1_i2	ankyrin repeat family a protein 2-like	345	15	3.76817e-11	0.62
17885	c35397_g1_i1	ankyrin repeat protein	205	20	7.16005e-08	0.6175
25730	c40633_g1_i1	ankyrin repeat protein	373	20	7.4924e-19	0.5645
25732	c40633_g1_i3	ankyrin repeat protein	1177	20	1.13746e-29	0.5
25733	c40633_g1_i4	ankyrin repeat protein	1682	20	5.244e-43	0.4915
25734	c40633_g1_i5	ankyrin repeat protein	773	20	1.13075e-18	0.5435
32330	c42944_g1_i2	ankyrin repeat protein	413	1	2.84025e-07	0.43
40961	c44647_g2_i1	ankyrin repeat protein	2198	20	8.24564e-24	0.5855
51423	c45859_g1_i1	ankyrin repeat protein	1131	20	4.8998e-15	0.4755
51426	c45859_g1_i2	ankyrin repeat protein	1150	20	6.26205e-15	0.4745
51429	c45859_g1_i4	ankyrin repeat protein	1213	20	1.29791e-14	0.4785
51430	c45859_g1_i5	ankyrin repeat protein	993	20	1.02978e-15	0.4775
52568	c45970_g2_i1	ankyrin repeat protein	1907	20	4.06603e-12	0.574
52571	c45970_g2_i3	ankyrin repeat protein	1873	20	3.96712e-12	0.574
52572	c45970_g2_i4	ankyrin repeat protein	1899	20	4.04955e-12	0.5785
57635	c46436_g1_i2	ankyrin repeat protein	1501	20	1.87176e-52	0.5045
29846	c42207_g1_i3	ankyrin repeat protein partial	983	20	4.33632e-19	0.5675
38524	c44277_g1_i2	ankyrin repeat protein partial	1066	20	3.20179e-31	0.5855
38998	c44353_g1_i3	ankyrin repeat protein partial	265	20	1.11002e-07	0.5295
26789	c41085_g1_i1	ankyrin repeat-containing	250	20	8.87387e-09	0.643
26790	c41085_g1_i2	ankyrin repeat-containing	261	20	6.40201e-09	0.643
1838	c4295_g1_i1	ankyrin repeat-containing protein	242	20	7.56886e-14	0.617
18435	c35869_g1_i2	ankyrin repeat-containing protein	617	20	1.31231e-12	0.5745
38996	c44353_g1_i1	ankyrin repeat-containing protein	268	20	7.08608e-07	0.54
10515	c24945_g1_i1	ankyrin sam and basic leucine zipper domain-containing protein 1-like	428	20	1.10521e-26	0.506
36841	c43981_g1_i2	ankyrin unc44	538	20	3.04846e-24	0.7335
36843	c43981_g1_i4	ankyrin unc44	476	20	1.09663e-28	0.742
36844	c43981_g1_i5	ankyrin unc44	501	20	1.09645e-31	0.7385
40046	c44506_g1_i4	ankyrin unc44	247	20	8.10142e-18	0.669
40049	c44506_g3_i1	ankyrin unc44	586	20	9.05638e-90	0.9215
40621	c44596_g1_i1	ankyrin unc44	245	20	8.43944e-28	0.801
40623	c44596_g1_i3	ankyrin unc44	216	20	1.81531e-22	0.7935
46932	c45395_g2_i3	ankyrin unc44	673	20	1.05024e-41	0.5655
46935	c45395_g2_i6	ankyrin unc44	245	20	1.08431e-16	0.6115
46939	c45395_g2_i9	ankyrin unc44	585	20	1.30577e-42	0.5905
47430	c45452_g4_i1	ankyrin unc44	1211	20	6.30407e-29	0.4905
55688	c46269_g1_i1	ankyrin unc44	663	20	5.49941e-48	0.5595
55692	c46269_g1_i5	ankyrin unc44	640	20	1.84204e-48	0.556
55700	c46269_g1_i13	ankyrin unc44	534	20	2.03402e-71	0.5965
40045	c44506_g1_i3	ankyrin-2-like isoform 1	469	20	2.44405e-63	0.723
40622	c44596_g1_i2	ankyrin-2-like isoform 1	323	20	9.68356e-40	0.775
41522	c44725_g1_i1	ankyrin-3-like isoform x1	392	20	1.26554e-27	0.7215
55644	c46265_g1_i2	ankyrin-3-like isoform x1	318	20	8.6234e-28	0.669
55649	c46265_g1_i3	ankyrin-3-like isoform x1	499	20	1.88799e-31	0.6925
55650	c46265_g1_i4	ankyrin-3-like isoform x1	302	20	3.5718e-17	0.7115
41523	c44725_g1_i2	ankyrin-3-like isoform x3	326	19	3.88699e-18	0.7442
25622	c40584_g1_i2	annexin a1	385	20	6.13596e-21	0.692
25623	c40584_g1_i3	annexin a11	327	20	3.28218e-21	0.695
30488	c42415_g1_i1	annexin a11	356	20	1.16727e-14	0.817
25205	c40399_g2_i2	annexin a11 isoform	310	20	8.00135e-23	0.7455
25206	c40399_g1_i2	annexin a11-like	220	20	3.85085e-15	0.71
25203	c40399_g1_i1	annexin a7	251	20	1.81461e-19	0.677
60253	c46665_g2_i1	annexin isoform 2	545	20	5.62726e-33	0.611
30489	c42415_g2_i1	annexin isoform b	206	20	1.32778e-11	0.76
60254	c46665_g2_i2	annexin ix cg5730-pc	317	20	1.40214e-20	0.6305
25204	c40399_g2_i1	annexin x	242	20	3.86453e-12	0.782
39288	c44402_g1_i1	annexin x	1380	20	4.1848e-69	0.5835
5966	c14170_g1_i1	annotation was added to scaffolds in november 2011~long-chain-fatty-acid- ligase	247	20	8.85965e-13	0.7245
2183	c5107_g1_i1	annulin-like isoform 1	233	20	3.71997e-35	0.837
21563	c38326_g1_i1	annulin-like isoform 1	694	20	4.42412e-37	0.6
21564	c38326_g1_i2	annulin-like isoform 1	509	20	7.79135e-38	0.6085
21565	c38326_g1_i3	annulin-like isoform 1	463	20	6.01931e-09	0.5765
21566	c38326_g1_i4	annulin-like isoform 1	651	20	3.00827e-35	0.597
61930	c48530_g1_i1	annulin-like isoform 2	231	20	5.35781e-27	0.755
63111	c50063_g1_i1	annulin-like isoform 2	301	20	6.72295e-33	0.7735
54757	c46186_g5_i1	anoctamin- partial	214	20	4.217e-16	0.808
7364	c17938_g1_i1	anoctamin-8-like isoform 1	335	20	1.19097e-16	0.696
7366	c17938_g1_i3	anoctamin-8-like isoform 1	334	20	1.98905e-17	0.693
51740	c45896_g1_i2	anoctamin-8-like isoform 1	652	20	5.16821e-20	0.7085
51752	c45896_g1_i14	anoctamin-8-like isoform 1	646	20	7.09179e-36	0.7125
51758	c45896_g1_i20	anoctamin-8-like isoform 1	552	20	2.26259e-20	0.7065
51760	c45896_g1_i22	anoctamin-8-like isoform 1	782	20	1.71775e-19	0.7085
54750	c46186_g4_i1	anoctamin-8-like isoform 1	318	20	1.65351e-31	0.809
7365	c17938_g1_i2	anoctamin-8-like isoform 2	248	20	1.14394e-13	0.7125
51743	c45896_g1_i5	anoctamin-8-like isoform 2	1334	20	3.16569e-18	0.7085
51748	c45896_g1_i10	anoctamin-8-like isoform 2	686	20	1.96331e-38	0.8265
54755	c46186_g4_i2	anoctamin-8-like isoform 2	299	20	1.82341e-24	0.7905
56563	c46345_g2_i1	anoctamin-8-like isoform 2	257	20	1.26844e-18	0.696
51746	c45896_g1_i8	anoctamin-8-like isoform 3	406	20	8.20618e-14	0.714
51754	c45896_g1_i16	anoctamin-8-like isoform 3	389	20	9.10545e-14	0.705
56562	c46345_g1_i1	anoctamin-8-like isoform x2	391	20	5.50284e-25	0.6115
9687	c23233_g1_i1	anopheles gambiae pest agap012902-pa	238	20	6.06831e-18	0.709
9688	c23233_g1_i2	anopheles gambiae pest agap012902-pa	219	20	1.29288e-14	0.6985
16893	c34366_g1_i1	anopheles stephensi ubiquitin	529	20	3.76449e-81	0.9895
29037	c41936_g1_i1	antennal esterase cxe18	656	20	8.05748e-24	0.521
32685	c43050_g1_i1	antennal esterase cxe18	448	20	4.48476e-38	0.546
32686	c43050_g2_i1	antennal esterase cxe18	351	20	5.63609e-30	0.537
57106	c46393_g1_i2	antennal esterase cxe18	383	20	1.56125e-18	0.6105
12911	c29103_g1_i2	antigen 1	330	1	3.19291e-06	0.49
57891	c46459_g2_i3	antigen b membrane protein	996	6	5.81081e-11	0.4383
57894	c46459_g2_i5	antigen b membrane protein	1071	6	6.51439e-12	0.435
57897	c46459_g2_i8	antigen b membrane protein	878	6	3.23562e-09	0.43
57901	c46459_g2_i12	antigen b membrane protein	992	6	4.63728e-11	0.4383
58802	c46540_g2_i2	antigen b membrane protein	1005	14	1.80001e-13	0.4129
58805	c46540_g2_i5	antigen b membrane protein	1002	14	1.87321e-12	0.4107
58808	c46540_g2_i8	antigen b membrane protein	1374	14	5.81093e-12	0.41
15993	c33318_g1_i1	anti-lipopolysaccharide factor	238	20	3.42418e-16	0.665
17818	c35346_g1_i2	anti-lipopolysaccharide factor	402	20	6.36909e-13	0.6495
33015	c43129_g1_i2	anti-lipopolysaccharide factor	302	20	4.56746e-17	0.7115
33016	c43129_g1_i3	anti-lipopolysaccharide factor	549	20	1.38924e-11	0.813
33017	c43129_g1_i4	anti-lipopolysaccharide factor	655	20	2.82153e-37	0.78
33018	c43129_g1_i5	anti-lipopolysaccharide factor	598	20	3.26705e-44	0.754
33019	c43129_g1_i6	anti-lipopolysaccharide factor	791	20	2.33128e-43	0.754
33020	c43129_g1_i7	anti-lipopolysaccharide factor	425	20	3.64436e-40	0.744
33388	c43230_g1_i2	anti-lipopolysaccharide factor	624	20	3.49106e-43	0.759
52973	c46009_g1_i1	anti-lipopolysaccharide factor	843	20	7.33387e-15	0.618
52974	c46009_g1_i2	anti-lipopolysaccharide factor	818	20	6.91824e-15	0.618
17817	c35346_g1_i1	anti-lipopolysaccharide factor isoform 5	251	2	1.40827e-12	0.585
2483	c5831_g1_i1	anti-lipopolysaccharide factor isoform partial	237	2	3.75511e-07	0.82
52975	c46009_g1_i3	anti-lipopolysaccharide factor-like protein	601	4	1.20455e-11	0.6825
36002	c43811_g2_i1	antimicrobial peptide type 2 precursor iic	370	4	6.21063e-08	0.5925
36004	c43811_g2_i2	antimicrobial peptide type 2 precursor iic	550	4	2.94232e-08	0.5825
36005	c43811_g2_i3	antimicrobial peptide type 2 precursor iic	410	3	7.72693e-08	0.6
36006	c43811_g2_i4	antimicrobial peptide type 2 precursor iic	480	2	1.05684e-07	0.62
36009	c43811_g2_i7	antimicrobial peptide type 2 precursor iic	519	3	1.23694e-07	0.6
36010	c43811_g2_i8	antimicrobial peptide type 2 precursor iic	275	2	5.92399e-07	0.57
36011	c43811_g2_i9	antimicrobial peptide type 2 precursor iic	671	4	9.74705e-08	0.575
36012	c43811_g2_i10	antimicrobial peptide type 2 precursor iic	234	3	5.01432e-07	0.5967
36014	c43811_g2_i11	antimicrobial peptide type 2 precursor iic	322	4	4.49687e-08	0.5925
50826	c45801_g1_i11	antioxidant enzyme	457	7	8.51324e-09	0.7714
3573	c8300_g1_i1	antiviral protein	252	4	1.23948e-06	0.6575
14753	c31912_g1_i1	antiviral protein	342	17	1.377e-13	0.6235
23083	c39248_g1_i3	antiviral protein	255	20	3.05529e-19	0.6005
36112	c43832_g4_i2	antiviral protein	680	20	1.11494e-34	0.5665
40877	c44633_g2_i1	antiviral protein	1554	20	2.16827e-21	0.47
40882	c44633_g2_i2	antiviral protein	1503	20	1.81737e-21	0.47
38775	c44322_g1_i2	ap endonuclease	535	20	4.70461e-68	0.748
31036	c42587_g1_i5	ap-1 complex subunit beta-1	202	6	1.50241e-09	0.8583
34180	c43411_g1_i1	ap-1 complex subunit beta-1	214	20	7.69071e-10	0.8025
41512	c44724_g1_i1	ap-1 complex subunit beta-1	321	20	4.57247e-23	1
41520	c44724_g1_i2	ap-1 complex subunit beta-1	374	20	1.3151e-12	0.997
56955	c46381_g1_i1	ap-1 complex subunit beta-1	396	20	3.77988e-65	0.9725
56956	c46381_g1_i2	ap-1 complex subunit beta-1	1036	20	0	0.9605
56957	c46381_g1_i3	ap-1 complex subunit beta-1	340	20	3.09782e-62	0.978
56958	c46381_g1_i4	ap-1 complex subunit beta-1	1145	20	0	0.9605
56959	c46381_g1_i5	ap-1 complex subunit beta-1	1042	20	4.48882e-172	0.951
56960	c46381_g1_i6	ap-1 complex subunit beta-1	263	20	1.82289e-42	0.9695
56961	c46381_g1_i7	ap-1 complex subunit beta-1	1135	20	0	0.959
56963	c46381_g1_i9	ap-1 complex subunit beta-1	233	20	4.02066e-31	0.9095
56964	c46381_g1_i10	ap-1 complex subunit beta-1	346	20	2.78555e-63	0.979
56965	c46381_g1_i11	ap-1 complex subunit beta-1	995	20	4.89125e-160	0.949
56966	c46381_g1_i12	ap-1 complex subunit beta-1	1102	20	2.00715e-179	0.9565
56967	c46381_g1_i13	ap-1 complex subunit beta-1	520	20	2.67061e-81	0.9795
56968	c46381_g1_i14	ap-1 complex subunit beta-1	843	20	1.2109e-133	0.9565
1830	c4283_g1_i1	ap-1 complex subunit gamma-1	294	20	1.30289e-25	0.6945
24875	c40247_g1_i3	ap-1 complex subunit gamma-1	415	20	1.69344e-15	0.7735
24876	c40247_g1_i4	ap-1 complex subunit gamma-1	499	20	2.05488e-16	0.7515
61157	c47515_g1_i1	ap-1 complex subunit gamma-1	342	20	2.22648e-63	0.962
62651	c49472_g1_i1	ap-1 complex subunit gamma-1	254	20	9.76245e-11	0.6455
32791	c43076_g2_i1	ap-1 complex subunit mu-1-i	222	20	2.06608e-38	0.954
39409	c44419_g2_i1	ap-1 complex subunit mu-1-like	384	20	8.48283e-81	0.9955
60696	c46947_g1_i1	ap-1 complex subunit mu-1-like	292	20	3.45327e-32	0.869
38566	c44284_g2_i1	ap-1 complex subunit sigma-2-like	440	20	4.09366e-44	0.8855
38567	c44284_g2_i2	ap-1 complex subunit sigma-2-like	480	20	1.71323e-70	0.906
38571	c44284_g2_i3	ap-1 complex subunit sigma-2-like	525	20	4.46227e-72	0.8935
38573	c44284_g2_i4	ap-1 complex subunit sigma-2-like	322	20	3.51052e-43	0.888
38574	c44284_g2_i5	ap-1 complex subunit sigma-2-like	430	20	4.14221e-44	0.8855
493	c1175_g1_i1	ap-2 complex subunit alpha-like	271	20	2.96223e-40	0.8565
5189	c12089_g1_i1	ap-2 complex subunit alpha-like	215	20	1.7048e-22	0.938
15051	c32249_g1_i1	ap-2 complex subunit alpha-like	344	20	2.75049e-39	0.7545
56962	c46381_g1_i8	ap-2 complex subunit beta-	271	20	7.26663e-21	0.8435
16864	c34338_g1_i1	ap-2 complex subunit beta-like	213	20	1.06459e-19	0.85
31032	c42587_g1_i1	ap-2 complex subunit beta-like	547	20	9.65566e-25	0.6865
31033	c42587_g1_i2	ap-2 complex subunit beta-like	385	20	3.73845e-30	0.798
31034	c42587_g1_i3	ap-2 complex subunit beta-like	563	20	4.46391e-33	0.7075
31035	c42587_g1_i4	ap-2 complex subunit beta-like	444	20	4.20343e-36	0.753
31037	c42587_g1_i6	ap-2 complex subunit beta-like	792	20	5.12025e-55	0.718
34181	c43411_g1_i2	ap-2 complex subunit beta-like	275	20	1.12218e-27	0.8685
44553	c45125_g3_i2	ap-2 complex subunit mu-like	429	20	1.00138e-72	0.9705
44558	c45125_g3_i6	ap-2 complex subunit mu-like	593	20	6.53988e-98	0.953
23784	c39641_g1_i1	ap-2 complex subunit sigma	257	20	2.44046e-10	0.8995
23785	c39641_g1_i2	ap-2 complex subunit sigma-like	362	20	4.94352e-22	0.965
23786	c39641_g1_i3	ap-2 complex subunit sigma-like	330	20	3.54454e-22	0.965
23787	c39641_g1_i4	ap-2 complex subunit sigma-like	293	20	2.26116e-22	0.965
19140	c36505_g1_i1	ap2-associated protein kinase 1	220	20	1.46332e-19	0.7645
25756	c40646_g2_i1	ap2-associated protein kinase 1	470	20	2.82187e-26	0.8035
29671	c42152_g1_i1	ap2-associated protein kinase 1	860	20	3.95992e-37	0.715
29673	c42152_g1_i3	ap2-associated protein kinase 1	281	20	1.90179e-33	0.817
61112	c47446_g1_i1	ap2-associated protein kinase 1	308	16	1.24369e-08	0.7388
62232	c48914_g1_i1	ap-3 complex subunit beta-1-like	218	20	8.69522e-15	0.7015
[truncated: 65,402 more rows]
